# Supplementary material
Source: publisher figshare collection journal article supplement (https://acs.figshare.com/ndownloader/files/3720520)
Supplement: Supplementary file 1 [file 3720520]

 
data_d625 
  
_audit_creation_method            SHELXL-2013 
_chemical_name_systematic 
; 
 ? 
; 
_chemical_name_common             ? 
_chemical_melting_point           ? 
_chemical_formula_moiety          ? 
_chemical_formula_sum 
 'C19 H16 Br2 N2 O3 S' 
_chemical_formula_weight          512.22 
  
loop_ 
 _atom_type_symbol 
 _atom_type_description 
 _atom_type_scat_dispersion_real 
 _atom_type_scat_dispersion_imag 
 _atom_type_scat_source 
 'C'  'C'   0.0033   0.0016 
 'International Tables Vol C Tables 4.2.6.8 and 6.1.1.4' 
 'H'  'H'   0.0000   0.0000 
 'International Tables Vol C Tables 4.2.6.8 and 6.1.1.4' 
 'N'  'N'   0.0061   0.0033 
 'International Tables Vol C Tables 4.2.6.8 and 6.1.1.4' 
 'O'  'O'   0.0106   0.0060 
 'International Tables Vol C Tables 4.2.6.8 and 6.1.1.4' 
 'Br'  'Br'  -0.2901   2.4595 
 'International Tables Vol C Tables 4.2.6.8 and 6.1.1.4' 
 'S'  'S'   0.1246   0.1234 
 'International Tables Vol C Tables 4.2.6.8 and 6.1.1.4' 
  
_space_group_crystal_system       monoclinic 
_space_group_IT_number            4 
_space_group_name_H-M_alt         'P 21' 
_space_group_name_Hall            'P 2yb' 
  
_shelx_space_group_comment 
; 
The symmetry employed for this shelxl refinement is uniquely defined 
by the following loop, which should always be used as a source of 
symmetry information in preference to the above space-group names. 
They are only intended as comments. 
; 
  
loop_ 
 _space_group_symop_operation_xyz 
 'x, y, z' 
 '-x, y+1/2, -z' 
  
_cell_length_a                    8.9120(8) 
_cell_length_b                    5.8904(6) 
_cell_length_c                    18.4113(16) 
_cell_angle_alpha                 90 
_cell_angle_beta                  102.422(3) 
_cell_angle_gamma                 90 
_cell_volume                      943.88(15) 
_cell_formula_units_Z             2 
_cell_measurement_temperature     100(2) 
_cell_measurement_reflns_used     9925 
_cell_measurement_theta_min       2.81 
_cell_measurement_theta_max       28.26 
  
_exptl_crystal_description        BLOCK 
_exptl_crystal_colour             Colourless 
_exptl_crystal_density_meas       'Not Measured' 
_exptl_crystal_density_method     'Not Measured' 
_exptl_crystal_density_diffrn     1.802 
_exptl_crystal_F_000              508 
_exptl_transmission_factor_min    ? 
_exptl_transmission_factor_max    ? 
_exptl_crystal_size_max           0.245 
_exptl_crystal_size_mid           0.128 
_exptl_crystal_size_min           0.036 
_exptl_absorpt_coefficient_mu     4.428 
_shelx_estimated_absorpt_T_min    0.410 
_shelx_estimated_absorpt_T_max    0.857 
_exptl_absorpt_correction_type    Multi-scan 
_exptl_absorpt_correction_T_min   0.5914 
_exptl_absorpt_correction_T_max   0.7457 
_exptl_absorpt_process_details    'Sadabs, (Sheldrick 2008)'
  
_exptl_special_details 
; 
 ? 
; 
  
_diffrn_ambient_temperature       100(2) 
_diffrn_radiation_wavelength      0.71073 
_diffrn_radiation_type            MoK\a 
_diffrn_source                    ? 
_diffrn_measurement_device_type   'Bruker D8 Venture' 
_diffrn_measurement_method        '\f and \w scans' 
_diffrn_detector_area_resol_mean  ? 
_diffrn_reflns_number             26356 
_diffrn_reflns_av_unetI/netI      0.0367 
_diffrn_reflns_av_R_equivalents   0.0400 
_diffrn_reflns_limit_h_min        -11 
_diffrn_reflns_limit_h_max        11 
_diffrn_reflns_limit_k_min        -7 
_diffrn_reflns_limit_k_max        7 
_diffrn_reflns_limit_l_min        -23 
_diffrn_reflns_limit_l_max        23 
_diffrn_reflns_theta_min          2.340 
_diffrn_reflns_theta_max          27.500 
_diffrn_reflns_theta_full         25.242 
_diffrn_measured_fraction_theta_max   1.000 
_diffrn_measured_fraction_theta_full  0.998 
_diffrn_reflns_Laue_measured_fraction_max    1.000 
_diffrn_reflns_Laue_measured_fraction_full   0.998 
_diffrn_reflns_point_group_measured_fraction_max   0.999 
_diffrn_reflns_point_group_measured_fraction_full  0.998 
_reflns_number_total              4339 
_reflns_number_gt                 4083 
_reflns_threshold_expression      'I > 2\s(I)' 
_reflns_Friedel_coverage          0.821 
_reflns_Friedel_fraction_max      0.998 
_reflns_Friedel_fraction_full     0.997 
  
_reflns_special_details 
; 
 Reflections were merged by SHELXL according to the crystal 
 class for the calculation of statistics and refinement. 
  
 _reflns_Friedel_fraction is defined as the number of unique 
 Friedel pairs measured divided by the number that would be 
 possible theoretically, ignoring centric projections and 
 systematic absences. 
; 
  
_computing_data_collection        'Bruker APEX2' 
_computing_cell_refinement        'Bruker SAINT' 
_computing_data_reduction         'Bruker SAINT' 
_computing_structure_solution     'SHELXS-97 (Sheldrick 2008)' 
_computing_structure_refinement   'SHELXL-2013 (Sheldrick, 2013)' 
_computing_molecular_graphics     'Bruker SHELXTL' 
_computing_publication_material   'Bruker SHELXTL' 
  
_refine_special_details 
; 
 ? 
; 
_refine_ls_structure_factor_coef  Fsqd 
_refine_ls_matrix_type            full 
_refine_ls_weighting_scheme       calc 
_refine_ls_weighting_details 
'w=1/[\s^2^(Fo^2^)+(0.0108P)^2^] where P=(Fo^2^+2Fc^2^)/3' 
_atom_sites_solution_primary      ? 
_atom_sites_solution_secondary    ? 
_atom_sites_solution_hydrogens    geom 
_refine_ls_hydrogen_treatment     constr 
_refine_ls_extinction_method      none 
_refine_ls_extinction_coef        . 
_refine_ls_abs_structure_details 
; 
 Flack x determined using 1767 quotients [(I+)-(I-)]/[(I+)+(I-)] 
 (Parsons and Flack (2004), Acta Cryst. A60, s61). 
; 
_refine_ls_abs_structure_Flack    0.010(4) 
_chemical_absolute_configuration  ? 
_refine_ls_number_reflns          4339 
_refine_ls_number_parameters      245 
_refine_ls_number_restraints      1 
_refine_ls_R_factor_all           0.0240 
_refine_ls_R_factor_gt            0.0203 
_refine_ls_wR_factor_ref          0.0393 
_refine_ls_wR_factor_gt           0.0385 
_refine_ls_goodness_of_fit_ref    1.035 
_refine_ls_restrained_S_all       1.035 
_refine_ls_shift/su_max           0.001 
_refine_ls_shift/su_mean          0.000 
  
loop_ 
 _atom_site_label 
 _atom_site_type_symbol 
 _atom_site_fract_x 
 _atom_site_fract_y 
 _atom_site_fract_z 
 _atom_site_U_iso_or_equiv 
 _atom_site_adp_type 
 _atom_site_occupancy 
 _atom_site_site_symmetry_order 
 _atom_site_calc_flag 
 _atom_site_refinement_flags_posn 
 _atom_site_refinement_flags_adp 
 _atom_site_refinement_flags_occupancy 
 _atom_site_disorder_assembly 
 _atom_site_disorder_group 
Br1 Br 0.94127(3) -0.01943(5) 0.66847(2) 0.01494(7) Uani 1 1 d . . . . . 
Br2 Br 0.17809(3) 0.52870(5) 0.65849(2) 0.01986(8) Uani 1 1 d . . . . . 
S1 S 0.52052(9) 0.14289(12) 0.87339(4) 0.01339(16) Uani 1 1 d . . . . . 
O1 O 0.7736(2) 0.0402(3) 0.80521(10) 0.0150(4) Uani 1 1 d . . . . . 
O2 O 0.4852(2) -0.0834(3) 0.84708(11) 0.0183(5) Uani 1 1 d . . . . . 
O3 O 0.4014(2) 0.2814(4) 0.89112(11) 0.0181(5) Uani 1 1 d . . . . . 
N1 N 0.6284(2) 0.4790(4) 0.67321(11) 0.0114(5) Uani 1 1 d . . . . . 
N2 N 0.5775(3) 0.2901(4) 0.80430(13) 0.0119(5) Uani 1 1 d . . . . . 
C1 C 0.6640(3) 0.5312(5) 0.60597(14) 0.0118(6) Uani 1 1 d . . . . . 
C2 C 0.6109(3) 0.7081(5) 0.55669(16) 0.0154(6) Uani 1 1 d . . . . . 
H2 H 0.5376 0.8149 0.5663 0.018 Uiso 1 1 calc R U . . . 
C3 C 0.6698(3) 0.7205(6) 0.49340(16) 0.0181(7) Uani 1 1 d . . . . . 
H3 H 0.6379 0.8403 0.4590 0.022 Uiso 1 1 calc R U . . . 
C4 C 0.7763(3) 0.5591(6) 0.47866(16) 0.0178(7) Uani 1 1 d . . . . . 
H4 H 0.8139 0.5723 0.4343 0.021 Uiso 1 1 calc R U . . . 
C5 C 0.8271(3) 0.3837(5) 0.52653(16) 0.0152(6) Uani 1 1 d . . . . . 
H5 H 0.8977 0.2750 0.5155 0.018 Uiso 1 1 calc R U . . . 
C6 C 0.7717(3) 0.3688(5) 0.59270(15) 0.0123(6) Uani 1 1 d . . . . . 
C7 C 0.8019(3) 0.2215(5) 0.65466(16) 0.0115(6) Uani 1 1 d . . . . . 
C8 C 0.7129(3) 0.2920(5) 0.70320(16) 0.0122(6) Uani 1 1 d . . . . . 
C9 C 0.6941(3) 0.1943(5) 0.77409(15) 0.0116(6) Uani 1 1 d . . . . . 
C10 C 0.4646(3) 0.4568(5) 0.76231(14) 0.0117(6) Uani 1 1 d . . . . . 
H10 H 0.4210 0.5482 0.7986 0.014 Uiso 1 1 calc R U . . . 
C11 C 0.5490(3) 0.6155(5) 0.71947(16) 0.0134(6) Uani 1 1 d . . . . . 
H11A H 0.4749 0.7190 0.6879 0.016 Uiso 1 1 calc R U . . . 
H11B H 0.6241 0.7085 0.7546 0.016 Uiso 1 1 calc R U . . . 
C12 C 0.3341(3) 0.3236(5) 0.71248(16) 0.0140(6) Uani 1 1 d . . . . . 
H12A H 0.2870 0.2195 0.7434 0.017 Uiso 1 1 calc R U . . . 
H12B H 0.3762 0.2309 0.6767 0.017 Uiso 1 1 calc R U . . . 
C13 C 0.6755(3) 0.1357(5) 0.95009(16) 0.0134(6) Uani 1 1 d . . . . . 
C14 C 0.7667(3) -0.0578(5) 0.96297(16) 0.0161(7) Uani 1 1 d . . . . . 
H14 H 0.7535 -0.1771 0.9274 0.019 Uiso 1 1 calc R U . . . 
C15 C 0.8773(3) -0.0739(5) 1.02865(17) 0.0164(7) Uani 1 1 d . . . . . 
H15 H 0.9403 -0.2053 1.0379 0.020 Uiso 1 1 calc R U . . . 
C16 C 0.8972(3) 0.0999(5) 1.08115(16) 0.0158(6) Uani 1 1 d . . . . . 
C17 C 0.8060(4) 0.2947(5) 1.06638(17) 0.0168(7) Uani 1 1 d . . . . . 
H17 H 0.8200 0.4151 1.1015 0.020 Uiso 1 1 calc R U . . . 
C18 C 0.6952(4) 0.3140(5) 1.00095(16) 0.0158(7) Uani 1 1 d . . . . . 
H18 H 0.6337 0.4468 0.9910 0.019 Uiso 1 1 calc R U . . . 
C19 C 1.0125(4) 0.0733(6) 1.15374(17) 0.0233(7) Uani 1 1 d . . . . . 
H19A H 0.9753 -0.0402 1.1846 0.035 Uiso 1 1 calc R U . . . 
H19B H 1.0260 0.2191 1.1800 0.035 Uiso 1 1 calc R U . . . 
H19C H 1.1111 0.0237 1.1438 0.035 Uiso 1 1 calc R U . . . 
  
loop_ 
 _atom_site_aniso_label 
 _atom_site_aniso_U_11 
 _atom_site_aniso_U_22 
 _atom_site_aniso_U_33 
 _atom_site_aniso_U_23 
 _atom_site_aniso_U_13 
 _atom_site_aniso_U_12 
Br1 0.01410(14) 0.01552(15) 0.01642(14) 0.00184(12) 0.00595(11) 0.00470(13) 
Br2 0.01418(14) 0.02140(19) 0.02223(16) -0.00160(13) -0.00002(12) 0.00526(13) 
S1 0.0147(4) 0.0144(4) 0.0126(4) -0.0017(3) 0.0066(3) -0.0014(3) 
O1 0.0160(10) 0.0151(11) 0.0140(10) 0.0008(9) 0.0036(8) 0.0020(9) 
O2 0.0215(12) 0.0164(12) 0.0186(11) -0.0039(9) 0.0080(10) -0.0058(9) 
O3 0.0170(11) 0.0232(12) 0.0161(11) -0.0010(9) 0.0083(9) 0.0015(10) 
N1 0.0131(11) 0.0115(12) 0.0107(11) 0.0006(11) 0.0050(9) 0.0028(11) 
N2 0.0125(12) 0.0130(13) 0.0106(12) 0.0008(10) 0.0031(10) 0.0010(10) 
C1 0.0088(12) 0.0140(15) 0.0125(13) -0.0015(13) 0.0023(11) -0.0026(13) 
C2 0.0118(15) 0.0162(16) 0.0172(16) 0.0024(13) 0.0008(13) 0.0015(12) 
C3 0.0144(15) 0.0234(17) 0.0157(16) 0.0088(14) 0.0014(13) 0.0010(14) 
C4 0.0137(14) 0.0275(18) 0.0128(14) 0.0028(14) 0.0044(12) -0.0010(13) 
C5 0.0103(15) 0.0209(16) 0.0144(15) -0.0008(13) 0.0027(13) 0.0009(13) 
C6 0.0076(14) 0.0159(15) 0.0122(15) -0.0012(12) -0.0002(12) -0.0017(12) 
C7 0.0085(14) 0.0111(14) 0.0145(15) -0.0002(12) 0.0013(12) -0.0013(12) 
C8 0.0116(14) 0.0120(15) 0.0121(15) -0.0014(12) 0.0005(12) -0.0004(12) 
C9 0.0115(14) 0.0130(15) 0.0109(14) -0.0036(12) 0.0034(12) -0.0035(12) 
C10 0.0113(13) 0.0110(14) 0.0132(13) -0.0027(12) 0.0037(11) 0.0002(12) 
C11 0.0144(15) 0.0105(14) 0.0164(15) -0.0014(12) 0.0054(13) 0.0018(12) 
C12 0.0139(15) 0.0121(14) 0.0153(16) -0.0003(12) 0.0015(13) 0.0013(12) 
C13 0.0170(15) 0.0143(15) 0.0104(14) 0.0004(12) 0.0063(13) -0.0010(13) 
C14 0.0258(16) 0.0120(16) 0.0132(14) 0.0006(12) 0.0099(13) -0.0011(13) 
C15 0.0184(15) 0.0157(16) 0.0177(15) 0.0026(12) 0.0096(13) 0.0014(12) 
C16 0.0151(15) 0.0180(16) 0.0155(15) 0.0049(13) 0.0060(13) -0.0027(13) 
C17 0.0197(16) 0.0171(16) 0.0144(16) -0.0036(13) 0.0054(13) -0.0036(13) 
C18 0.0178(16) 0.0128(15) 0.0187(16) -0.0018(13) 0.0083(14) 0.0009(13) 
C19 0.0223(16) 0.0268(19) 0.0192(16) 0.0012(14) 0.0008(14) -0.0020(15) 
  
_geom_special_details 
; 
 All esds (except the esd in the dihedral angle between two l.s. planes) 
 are estimated using the full covariance matrix.  The cell esds are taken 
 into account individually in the estimation of esds in distances, angles 
 and torsion angles; correlations between esds in cell parameters are only 
 used when they are defined by crystal symmetry.  An approximate (isotropic) 
 treatment of cell esds is used for estimating esds involving l.s. planes. 
; 
  
loop_ 
 _geom_bond_atom_site_label_1 
 _geom_bond_atom_site_label_2 
 _geom_bond_distance 
 _geom_bond_site_symmetry_2 
 _geom_bond_publ_flag 
Br1 C7 1.867(3) . ? 
Br2 C12 1.946(3) . ? 
S1 O2 1.430(2) . ? 
S1 O3 1.432(2) . ? 
S1 N2 1.705(2) . ? 
S1 C13 1.750(3) . ? 
O1 C9 1.216(3) . ? 
N1 C1 1.377(3) . ? 
N1 C8 1.381(4) . ? 
N1 C11 1.460(3) . ? 
N2 C9 1.399(4) . ? 
N2 C10 1.497(4) . ? 
C1 C2 1.396(4) . ? 
C1 C6 1.414(4) . ? 
C2 C3 1.379(4) . ? 
C2 H2 0.9500 . ? 
C3 C4 1.411(4) . ? 
C3 H3 0.9500 . ? 
C4 C5 1.370(4) . ? 
C4 H4 0.9500 . ? 
C5 C6 1.412(4) . ? 
C5 H5 0.9500 . ? 
C6 C7 1.412(4) . ? 
C7 C8 1.380(4) . ? 
C8 C9 1.468(4) . ? 
C10 C11 1.522(4) . ? 
C10 C12 1.533(4) . ? 
C10 H10 1.0000 . ? 
C11 H11A 0.9900 . ? 
C11 H11B 0.9900 . ? 
C12 H12A 0.9900 . ? 
C12 H12B 0.9900 . ? 
C13 C14 1.390(4) . ? 
C13 C18 1.393(4) . ? 
C14 C15 1.389(4) . ? 
C14 H14 0.9500 . ? 
C15 C16 1.393(4) . ? 
C15 H15 0.9500 . ? 
C16 C17 1.399(4) . ? 
C16 C19 1.509(4) . ? 
C17 C18 1.388(4) . ? 
C17 H17 0.9500 . ? 
C18 H18 0.9500 . ? 
C19 H19A 0.9800 . ? 
C19 H19B 0.9800 . ? 
C19 H19C 0.9800 . ? 
  
loop_ 
 _geom_angle_atom_site_label_1 
 _geom_angle_atom_site_label_2 
 _geom_angle_atom_site_label_3 
 _geom_angle 
 _geom_angle_site_symmetry_1 
 _geom_angle_site_symmetry_3 
 _geom_angle_publ_flag 
O2 S1 O3 119.24(14) . . ? 
O2 S1 N2 107.51(12) . . ? 
O3 S1 N2 103.58(13) . . ? 
O2 S1 C13 109.19(14) . . ? 
O3 S1 C13 108.96(13) . . ? 
N2 S1 C13 107.72(13) . . ? 
C1 N1 C8 109.0(2) . . ? 
C1 N1 C11 129.5(2) . . ? 
C8 N1 C11 119.8(2) . . ? 
C9 N2 C10 122.3(2) . . ? 
C9 N2 S1 117.2(2) . . ? 
C10 N2 S1 116.36(18) . . ? 
N1 C1 C2 129.8(2) . . ? 
N1 C1 C6 107.5(2) . . ? 
C2 C1 C6 122.7(2) . . ? 
C3 C2 C1 116.8(3) . . ? 
C3 C2 H2 121.6 . . ? 
C1 C2 H2 121.6 . . ? 
C2 C3 C4 121.4(3) . . ? 
C2 C3 H3 119.3 . . ? 
C4 C3 H3 119.3 . . ? 
C5 C4 C3 121.8(3) . . ? 
C5 C4 H4 119.1 . . ? 
C3 C4 H4 119.1 . . ? 
C4 C5 C6 118.3(3) . . ? 
C4 C5 H5 120.9 . . ? 
C6 C5 H5 120.9 . . ? 
C5 C6 C7 134.0(3) . . ? 
C5 C6 C1 118.9(3) . . ? 
C7 C6 C1 107.1(2) . . ? 
C8 C7 C6 107.6(3) . . ? 
C8 C7 Br1 126.8(2) . . ? 
C6 C7 Br1 125.6(2) . . ? 
C7 C8 N1 108.7(2) . . ? 
C7 C8 C9 130.4(3) . . ? 
N1 C8 C9 120.8(2) . . ? 
O1 C9 N2 121.4(3) . . ? 
O1 C9 C8 123.0(3) . . ? 
N2 C9 C8 115.6(2) . . ? 
N2 C10 C11 108.6(2) . . ? 
N2 C10 C12 108.2(2) . . ? 
C11 C10 C12 113.6(2) . . ? 
N2 C10 H10 108.8 . . ? 
C11 C10 H10 108.8 . . ? 
C12 C10 H10 108.8 . . ? 
N1 C11 C10 108.6(2) . . ? 
N1 C11 H11A 110.0 . . ? 
C10 C11 H11A 110.0 . . ? 
N1 C11 H11B 110.0 . . ? 
C10 C11 H11B 110.0 . . ? 
H11A C11 H11B 108.3 . . ? 
C10 C12 Br2 110.8(2) . . ? 
C10 C12 H12A 109.5 . . ? 
Br2 C12 H12A 109.5 . . ? 
C10 C12 H12B 109.5 . . ? 
Br2 C12 H12B 109.5 . . ? 
H12A C12 H12B 108.1 . . ? 
C14 C13 C18 121.2(3) . . ? 
C14 C13 S1 119.2(2) . . ? 
C18 C13 S1 119.2(2) . . ? 
C15 C14 C13 118.9(3) . . ? 
C15 C14 H14 120.5 . . ? 
C13 C14 H14 120.5 . . ? 
C14 C15 C16 121.0(3) . . ? 
C14 C15 H15 119.5 . . ? 
C16 C15 H15 119.5 . . ? 
C15 C16 C17 119.1(3) . . ? 
C15 C16 C19 120.0(3) . . ? 
C17 C16 C19 120.9(3) . . ? 
C18 C17 C16 120.7(3) . . ? 
C18 C17 H17 119.6 . . ? 
C16 C17 H17 119.6 . . ? 
C17 C18 C13 119.0(3) . . ? 
C17 C18 H18 120.5 . . ? 
C13 C18 H18 120.5 . . ? 
C16 C19 H19A 109.5 . . ? 
C16 C19 H19B 109.5 . . ? 
H19A C19 H19B 109.5 . . ? 
C16 C19 H19C 109.5 . . ? 
H19A C19 H19C 109.5 . . ? 
H19B C19 H19C 109.5 . . ? 
  
_refine_diff_density_max    0.371 
_refine_diff_density_min   -0.244 
_refine_diff_density_rms    0.062 
  
_shelxl_version_number 2013-3 
  
_shelx_res_file 
; 
TITL d625 in P2(1) 
CELL 0.71073 8.9120 5.8904 18.4113 90.000 102.422 90.000 
ZERR 2.00 0.0008 0.0006 0.0016 0.000 0.003 0.000 
LATT -1 
SYMM -x, y+1/2, -z 
SFAC C  H  N  O  Br S 
UNIT 38 32 4 6 4 2 
OMIT 0 0 2 
OMIT  -1.00  55.00 
L.S. 4 
ACTA 
BOND $H 
FMAP 2 
PLAN 20 
SIZE 0.036 0.128 0.245 
HTAB 
TEMP -173.150 
WGHT    0.010800 
FVAR       0.21643 
BR1   5    0.941270   -0.019428    0.668469    11.00000    0.01410    0.01552 = 
         0.01642    0.00184    0.00595    0.00470 
BR2   5    0.178092    0.528697    0.658487    11.00000    0.01418    0.02140 = 
         0.02223   -0.00160   -0.00002    0.00526 
S1    6    0.520524    0.142893    0.873386    11.00000    0.01475    0.01442 = 
         0.01264   -0.00172    0.00659   -0.00145 
O1    4    0.773607    0.040193    0.805210    11.00000    0.01597    0.01513 = 
         0.01399    0.00077    0.00359    0.00198 
O2    4    0.485162   -0.083444    0.847082    11.00000    0.02154    0.01639 = 
         0.01856   -0.00386    0.00797   -0.00582 
O3    4    0.401368    0.281449    0.891124    11.00000    0.01705    0.02321 = 
         0.01613   -0.00103    0.00830    0.00149 
N1    3    0.628366    0.479044    0.673205    11.00000    0.01313    0.01146 = 
         0.01067    0.00064    0.00502    0.00277 
N2    3    0.577518    0.290125    0.804298    11.00000    0.01247    0.01302 = 
         0.01060    0.00081    0.00307    0.00102 
C1    1    0.663974    0.531226    0.605972    11.00000    0.00884    0.01398 = 
         0.01246   -0.00152    0.00234   -0.00261 
C2    1    0.610884    0.708079    0.556694    11.00000    0.01179    0.01621 = 
         0.01719    0.00244    0.00079    0.00153 
AFIX  43 
H2    2    0.537646    0.814863    0.566292    11.00000   -1.20000 
AFIX   0 
C3    1    0.669785    0.720474    0.493401    11.00000    0.01437    0.02345 = 
         0.01568    0.00879    0.00144    0.00099 
AFIX  43 
H3    2    0.637922    0.840269    0.458992    11.00000   -1.20000 
AFIX   0 
C4    1    0.776347    0.559062    0.478656    11.00000    0.01365    0.02755 = 
         0.01281    0.00285    0.00443   -0.00100 
AFIX  43 
H4    2    0.813939    0.572330    0.434314    11.00000   -1.20000 
AFIX   0 
C5    1    0.827097    0.383708    0.526535    11.00000    0.01031    0.02093 = 
         0.01445   -0.00085    0.00266    0.00091 
AFIX  43 
H5    2    0.897708    0.274964    0.515505    11.00000   -1.20000 
AFIX   0 
C6    1    0.771731    0.368808    0.592696    11.00000    0.00764    0.01592 = 
         0.01221   -0.00118   -0.00017   -0.00170 
C7    1    0.801861    0.221533    0.654656    11.00000    0.00848    0.01107 = 
         0.01445   -0.00015    0.00133   -0.00127 
C8    1    0.712866    0.291985    0.703203    11.00000    0.01159    0.01195 = 
         0.01209   -0.00135    0.00053   -0.00038 
C9    1    0.694139    0.194298    0.774090    11.00000    0.01147    0.01295 = 
         0.01092   -0.00364    0.00336   -0.00352 
C10   1    0.464604    0.456799    0.762305    11.00000    0.01126    0.01102 = 
         0.01316   -0.00270    0.00366    0.00020 
AFIX  13 
H10   2    0.421046    0.548198    0.798648    11.00000   -1.20000 
AFIX   0 
C11   1    0.548980    0.615500    0.719473    11.00000    0.01437    0.01047 = 
         0.01637   -0.00135    0.00540    0.00183 
AFIX  23 
H11A  2    0.474936    0.718954    0.687875    11.00000   -1.20000 
H11B  2    0.624083    0.708507    0.754597    11.00000   -1.20000 
AFIX   0 
C12   1    0.334120    0.323644    0.712479    11.00000    0.01389    0.01208 = 
         0.01533   -0.00034    0.00150    0.00126 
AFIX  23 
H12A  2    0.286999    0.219534    0.743430    11.00000   -1.20000 
H12B  2    0.376197    0.230934    0.676661    11.00000   -1.20000 
AFIX   0 
C13   1    0.675467    0.135673    0.950090    11.00000    0.01696    0.01427 = 
         0.01042    0.00041    0.00626   -0.00102 
C14   1    0.766658   -0.057777    0.962975    11.00000    0.02581    0.01203 = 
         0.01317    0.00058    0.00987   -0.00108 
AFIX  43 
H14   2    0.753547   -0.177068    0.927442    11.00000   -1.20000 
AFIX   0 
C15   1    0.877279   -0.073873    1.028649    11.00000    0.01841    0.01568 = 
         0.01766    0.00260    0.00965    0.00142 
AFIX  43 
H15   2    0.940283   -0.205309    1.037876    11.00000   -1.20000 
AFIX   0 
C16   1    0.897155    0.099856    1.081153    11.00000    0.01506    0.01802 = 
         0.01547    0.00494    0.00603   -0.00266 
C17   1    0.805961    0.294664    1.066376    11.00000    0.01975    0.01705 = 
         0.01443   -0.00357    0.00537   -0.00359 
AFIX  43 
H17   2    0.819986    0.415111    1.101504    11.00000   -1.20000 
AFIX   0 
C18   1    0.695191    0.313969    1.000953    11.00000    0.01777    0.01278 = 
         0.01866   -0.00185    0.00826    0.00087 
AFIX  43 
H18   2    0.633748    0.446811    0.991017    11.00000   -1.20000 
AFIX   0 
C19   1    1.012487    0.073278    1.153736    11.00000    0.02230    0.02681 = 
         0.01920    0.00117    0.00079   -0.00196 
AFIX 137 
H19A  2    0.975295   -0.040201    1.184592    11.00000   -1.50000 
H19B  2    1.025975    0.219115    1.179952    11.00000   -1.50000 
H19C  2    1.111111    0.023655    1.143816    11.00000   -1.50000 
  
AFIX   0 
HKLF 4 
  
REM  d625 in P2(1) 
REM R1 =  0.0203 for    4083 Fo > 4sig(Fo)  and  0.0240 for all    4339 data 
REM    245 parameters refined using      1 restraints 
  
END 
  
WGHT      0.0108      0.0000 
  
REM Instructions for potential hydrogen bonds 
EQIV $1 x, y+1, z 
HTAB C10 O2_$1 
HTAB C11 Br2 
HTAB C11 O1_$1 
  
REM Highest difference peak  0.371,  deepest hole -0.244,  1-sigma level  0.062 
Q1    1   0.1661  0.3569  0.6593  11.00000  0.05    0.32 
Q2    1   0.7058  0.0251  0.9784  11.00000  0.05    0.31 
Q3    1   0.1373  0.5023  0.6978  11.00000  0.05    0.30 
Q4    1   0.6400  0.5280  0.6375  11.00000  0.05    0.30 
Q5    1   0.5699  0.2265  0.8391  11.00000  0.05    0.29 
Q6    1   1.0071 -0.1011  0.6402  11.00000  0.05    0.28 
Q7    1   0.7022  0.2281  0.7319  11.00000  0.05    0.28 
Q8    1   0.7162  0.2171  0.6736  11.00000  0.05    0.28 
Q9    1   0.5772  0.5332  0.6943  11.00000  0.05    0.27 
Q10   1   0.7334  0.4868  0.6093  11.00000  0.05    0.26 
Q11   1   0.8876  0.1210  0.6734  11.00000  0.05    0.26 
Q12   1   0.2436  0.6167  0.6332  11.00000  0.05    0.26 
Q13   1   0.8358  0.1602  1.0828  11.00000  0.05    0.25 
Q14   1   0.4730  0.0092  0.8804  11.00000  0.05    0.25 
Q15   1   0.8445 -0.0203  0.9929  11.00000  0.05    0.25 
Q16   1   0.8210 -0.2365  1.0646  11.00000  0.05    0.25 
Q17   1   0.8845 -0.1367  0.6770  11.00000  0.05    0.25 
Q18   1   0.9272  0.0326  1.0412  11.00000  0.05    0.24 
Q19   1   0.1030  0.6189  0.6835  11.00000  0.05    0.24 
Q20   1   0.1785  0.6940  0.6561  11.00000  0.05    0.24 
; 
_shelx_res_checksum   93364 
  
_shelx_hkl_file 
; 
   1   0   0    2.19    0.27 
   1   0   0    2.52    0.30 
  -2   0   0   10.15    0.77 
  -2   0   0    9.05    0.73 
   2   0   0    9.53    0.80 
   2   0   0    9.69    0.74 
   2   0   0    9.20    0.74 
   2   0   0    8.87    0.81 
  -2   0   0    8.14    0.78 
   3   0   0   90.32    4.75 
  -3   0   0   88.79    4.71 
  -3   0   0   91.43    4.73 
  -3   0   0   93.59    4.73 
   3   0   0   91.24    4.71 
   3   0   0   87.33    4.68 
   3   0   0   93.47    4.73 
   4   0   0    8.18    1.08 
  -4   0   0    6.08    1.03 
  -4   0   0    7.09    0.98 
   4   0   0    7.03    0.97 
   4   0   0    6.12    0.93 
   4   0   0    6.97    0.90 
  -4   0   0    7.81    0.99 
  -5   0   0   19.21    1.71 
   5   0   0   18.93    2.04 
   5   0   0   18.13    1.78 
   5   0   0   16.50    1.78 
   5   0   0   19.88    1.61 
  -5   0   0   19.15    1.64 
   5   0   0   17.73    1.79 
  -5   0   0   19.71    1.92 
   6   0   0   45.99    3.24 
  -6   0   0   45.20    2.96 
   6   0   0   42.68    2.94 
   6   0   0   40.50    3.32 
  -6   0   0   46.58    3.05 
   6   0   0   43.53    3.12 
  -6   0   0   43.07    3.28 
   6   0   0   42.62    3.17 
   7   0   0   97.39    6.36 
   7   0   0  104.64    6.16 
  -7   0   0  104.87    6.24 
  -7   0   0  106.06    6.06 
   7   0   0  107.93    6.00 
   7   0   0  100.58    6.15 
  -7   0   0  110.42    6.03 
   7   0   0  103.09    6.07 
  -8   0   0  131.88    8.11 
  -8   0   0  144.45    8.50 
   8   0   0  152.42    8.30 
   8   0   0  152.78    8.38 
  -8   0   0  149.53    8.04 
   8   0   0  152.02    8.16 
   8   0   0  130.20    8.58 
   9   0   0   53.01    4.89 
  -9   0   0   61.17    5.39 
   9   0   0   58.75    4.58 
  -9   0   0   57.01    4.49 
   9   0   0   54.63    4.44 
  -9   0   0   60.17    4.29 
   9   0   0   56.07    4.70 
   9   0   0   53.28    5.23 
  10   0   0    0.59    2.49 
  10   0   0   -0.63    2.95 
  10   0   0    2.02    2.60 
 -10   0   0   -1.12    1.76 
  10   0   0    1.96    2.32 
 -10   0   0   -0.39    2.00 
 -10   0   0   -2.17    2.76 
  11   0   0   -3.35    3.11 
 -11   0   0    0.90    2.50 
  11   0   0    3.06    2.60 
 -11   0   0    5.94    3.89 
  11   0   0    7.84    4.24 
   0  -1   0    0.10    0.20 
   0  -1   0    0.17    0.24 
   0  -1   0   -0.07    0.20 
   0  -1   0    0.18    0.27 
   0  -1   0   -0.15    0.18 
   0   1   0   -0.13    0.29 
   0   1   0   -0.10    0.16 
   0   1   0    0.01    0.20 
   0   1   0    0.13    0.19 
   0   1   0    0.21    0.28 
   1  -1   0  317.42   15.89 
  -1  -1   0  316.80   15.75 
   1  -1   0  315.49   15.58 
  -1  -1   0  315.15   15.40 
   1  -1   0  297.81   15.82 
  -1  -1   0  311.48   15.36 
   1  -1   0  301.51   15.38 
  -1  -1   0  315.65   15.74 
   1  -1   0  324.57   15.51 
  -1   1   0  343.91   15.89 
  -1   1   0  337.29   15.54 
   1   1   0  333.04   15.74 
   1   1   0  345.56   15.35 
   1   1   0  343.96   15.45 
  -1   1   0  357.06   15.89 
  -1   1   0  326.95   15.38 
   1   1   0  342.20   15.78 
  -1   1   0  339.39   15.59 
   2  -1   0  521.23   26.00 
   2  -1   0  531.18   26.81 
   2  -1   0  547.88   26.27 
  -2  -1   0  547.78   25.88 
  -2  -1   0  535.41   26.59 
   2  -1   0  548.47   26.12 
   2  -1   0  532.98   26.75 
  -2  -1   0  528.86   26.59 
  -2  -1   0  543.29   25.90 
  -2   1   0  573.64   26.01 
  -2   1   0  540.67   26.16 
  -2   1   0  594.41   26.25 
  -2   1   0  553.73   26.78 
   2   1   0  586.18   25.98 
   2   1   0  588.24   26.65 
  -2   1   0  572.77   26.79 
   2   1   0  575.89   26.59 
   3  -1   0  131.27    6.20 
  -3  -1   0  127.73    6.14 
   3  -1   0  126.83    6.33 
   3  -1   0  128.68    6.46 
   3  -1   0  133.38    6.59 
   3  -1   0  133.97    6.35 
  -3  -1   0  130.98    6.01 
  -3  -1   0  132.82    6.16 
   3   1   0  109.02    6.09 
  -3   1   0  112.35    6.32 
  -3   1   0  114.78    6.35 
   3   1   0  114.70    6.16 
   3   1   0  116.38    6.09 
  -3   1   0  114.42    6.08 
  -3   1   0  110.21    6.34 
  -3   1   0  114.10    6.32 
   4  -1   0   30.01    2.13 
   4  -1   0   32.07    2.18 
  -4  -1   0   31.12    1.97 
   4  -1   0   30.51    2.33 
   4  -1   0   30.27    2.26 
   4  -1   0   32.00    2.60 
  -4  -1   0   30.62    1.97 
  -4  -1   0   31.43    2.08 
  -4   1   0   30.35    2.10 
   4   1   0   31.19    1.98 
   4   1   0   30.95    2.02 
   4   1   0   31.34    2.13 
  -4   1   0   31.30    2.45 
  -4   1   0   28.03    2.20 
  -4   1   0   28.79    2.14 
   5  -1   0   33.45    2.48 
  -5  -1   0   30.30    2.36 
   5  -1   0   34.58    2.71 
  -5  -1   0   30.06    2.28 
   5  -1   0   30.94    2.53 
   5  -1   0   34.04    2.63 
  -5  -1   0   32.16    2.28 
   5  -1   0   34.63    3.03 
   5   1   0   37.14    2.38 
  -5   1   0   37.97    2.65 
   5   1   0   38.38    2.58 
  -5   1   0   38.65    2.58 
   5   1   0   36.09    2.40 
  -5   1   0   37.36    2.92 
   6  -1   0   61.67    4.32 
   6  -1   0   58.58    3.69 
  -6  -1   0   59.57    3.41 
  -6  -1   0   55.75    3.55 
   6  -1   0   64.35    3.77 
   6  -1   0   61.09    3.59 
   6  -1   0   62.27    3.91 
  -6  -1   0   52.64    3.37 
  -6   1   0   46.29    3.58 
  -6   1   0   41.90    3.79 
   6   1   0   44.08    3.36 
   6   1   0   45.85    3.47 
  -6   1   0   47.01    3.44 
   6   1   0   44.14    3.51 
   7  -1   0  126.38    7.41 
  -7  -1   0  120.31    7.26 
   7  -1   0  124.71    7.70 
  -7  -1   0  127.83    7.25 
   7  -1   0  126.37    7.48 
  -7  -1   0  127.96    7.39 
   7  -1   0  121.21    7.96 
   7  -1   0  128.92    7.53 
   7   1   0  144.91    7.47 
  -7   1   0  147.62    7.99 
  -7   1   0  136.79    7.62 
   7   1   0  143.62    7.45 
   7   1   0  144.63    7.51 
  -7   1   0  143.79    7.49 
   7   1   0  142.91    7.57 
   8  -1   0    3.39    2.29 
   8  -1   0    4.25    1.85 
   8  -1   0    4.15    1.83 
  -8  -1   0    5.46    1.77 
  -8  -1   0    6.11    1.45 
   8  -1   0    5.50    1.83 
  -8  -1   0    3.87    1.39 
  -8   1   0    2.65    1.32 
  -8   1   0    3.81    2.08 
   8   1   0    2.32    1.36 
   8   1   0    4.51    1.47 
  -8   1   0    3.30    1.52 
   8   1   0    3.41    1.74 
   8   1   0    4.10    1.73 
   8   1   0    4.09    1.53 
   9  -1   0   10.42    2.65 
   9  -1   0   16.63    3.57 
   9  -1   0   10.55    2.02 
  -9  -1   0   13.00    2.16 
  -9  -1   0   14.32    2.17 
  -9  -1   0   16.30    2.76 
   9  -1   0   11.97    2.45 
   9  -1   0   13.43    2.63 
   9   1   0   14.24    2.75 
   9   1   0   19.46    2.71 
   9   1   0   17.01    2.40 
   9   1   0   19.12    2.64 
   9   1   0   16.31    3.01 
  -9   1   0   19.11    3.41 
  -9   1   0   21.19    2.80 
  10  -1   0   55.62    6.15 
  10  -1   0   58.39    5.30 
  10  -1   0   49.93    5.97 
 -10  -1   0   52.01    4.77 
 -10  -1   0   46.57    4.75 
  10  -1   0   46.86    5.86 
 -10  -1   0   53.85    6.11 
  10   1   0   66.41    5.66 
  10   1   0   58.57    5.90 
 -10   1   0   65.74    5.27 
  10   1   0   66.96    5.53 
 -10   1   0   59.99    5.40 
  10   1   0   56.95    6.07 
 -10   1   0   56.58    6.94 
  11  -1   0   16.66    5.22 
  11  -1   0   24.70    4.69 
  11  -1   0   20.77    3.85 
 -11  -1   0   21.47    3.27 
  11   1   0   10.70    3.30 
 -11   1   0   14.75    3.44 
  11   1   0   14.14    4.21 
   0  -2   0  375.98   18.37 
   0  -2   0  370.14   18.12 
   0  -2   0  369.48   18.32 
   0  -2   0  390.95   17.88 
   0  -2   0  367.51   17.98 
   0   2   0  355.52   17.94 
   0   2   0  386.17   18.33 
   0   2   0  368.20   17.84 
   0   2   0  388.30   18.38 
   0   2   0  383.22   18.10 
   1  -2   0  442.42   22.04 
  -1  -2   0  453.84   21.50 
  -1  -2   0  458.01   21.99 
   1  -2   0  428.11   21.74 
   1  -2   0  466.21   22.15 
  -1  -2   0  467.51   21.97 
   1  -2   0  441.54   21.61 
  -1  -2   0  459.50   21.61 
   1  -2   0  454.13   21.46 
   1   2   0  463.92   21.47 
  -1   2   0  464.71   22.13 
  -1   2   0  467.23   21.70 
   1   2   0  448.93   21.64 
  -1   2   0  434.14   21.70 
   1   2   0  448.31   21.93 
  -1   2   0  460.78   21.44 
   1   2   0  450.94   22.01 
  -1   2   0  440.14   22.06 
  -2  -2   0   11.14    1.02 
   2  -2   0   11.12    1.36 
   2  -2   0   11.65    1.32 
   2  -2   0   10.48    1.14 
  -2  -2   0    9.95    1.17 
  -2  -2   0    9.55    0.98 
   2  -2   0   10.78    1.19 
  -2  -2   0   10.30    1.23 
   2  -2   0   11.76    1.62 
  -3  -2   0   94.17    4.69 
   3  -2   0   99.64    4.99 
  -3  -2   0   93.31    4.73 
   3  -2   0   92.69    5.06 
  -3  -2   0   92.58    4.68 
   3  -2   0   88.73    5.36 
   3  -2   0   94.76    5.13 
  -3  -2   0   95.59    4.68 
   3  -2   0   94.17    4.78 
   3   2   0   78.55    4.61 
   3   2   0   88.72    4.74 
  -3   2   0   81.93    5.12 
  -3   2   0   83.18    4.62 
   3   2   0   81.45    4.46 
  -3   2   0   82.50    5.12 
  -3   2   0   79.57    4.91 
  -3   2   0   83.13    4.96 
   3   2   0   84.36    4.82 
   4  -2   0    6.03    1.57 
  -4  -2   0    6.56    0.85 
  -4  -2   0    7.41    1.03 
   4  -2   0    6.44    1.29 
  -4  -2   0    7.68    1.05 
   4  -2   0    5.96    1.24 
   4  -2   0    6.75    1.10 
  -4  -2   0    6.73    0.97 
   4  -2   0    7.51    1.20 
   4   2   0    5.90    1.10 
  -4   2   0    3.86    0.95 
   4   2   0    6.66    0.97 
  -4   2   0    5.94    1.35 
  -4   2   0    4.99    0.86 
  -4   2   0    4.40    1.27 
  -4   2   0    4.21    1.02 
   4   2   0    5.41    0.80 
  -5  -2   0   19.74    1.84 
  -5  -2   0   17.69    1.76 
   5  -2   0   16.32    2.27 
  -5  -2   0   20.79    1.67 
   5  -2   0   18.07    2.63 
  -5  -2   0   17.95    1.57 
   5  -2   0   18.56    1.95 
   5  -2   0   19.10    2.01 
   5  -2   0   19.97    2.27 
  -5   2   0   16.37    1.97 
  -5   2   0   12.96    2.16 
  -5   2   0   14.97    1.66 
   5   2   0   14.89    2.00 
  -5   2   0   14.79    2.03 
   5   2   0   13.47    1.50 
   6  -2   0   29.00    3.17 
  -6  -2   0   32.46    2.40 
  -6  -2   0   32.34    2.52 
   6  -2   0   28.31    3.82 
  -6  -2   0   31.44    2.59 
   6  -2   0   31.37    2.77 
   6  -2   0   30.38    3.03 
  -6  -2   0   33.40    2.69 
   6  -2   0   30.10    2.93 
   6   2   0   30.62    3.00 
   6   2   0   32.78    2.50 
  -6   2   0   33.41    2.72 
   6   2   0   37.63    2.77 
  -6   2   0   34.03    3.70 
  -6   2   0   32.62    2.98 
  -6   2   0   33.95    2.91 
   7  -2   0   53.96    4.35 
  -7  -2   0   57.05    3.87 
   7  -2   0   57.93    4.78 
  -7  -2   0   58.99    4.05 
   7  -2   0   57.04    5.43 
  -7  -2   0   57.12    4.12 
  -7  -2   0   57.27    3.93 
   7  -2   0   62.04    4.58 
  -7   2   0   67.05    4.41 
  -7   2   0   61.74    5.37 
  -7   2   0   60.14    4.47 
   7   2   0   55.90    4.44 
   7   2   0   63.91    3.94 
   7   2   0   62.72    4.28 
   8  -2   0   54.72    4.60 
   8  -2   0   53.93    4.95 
  -8  -2   0   45.22    4.10 
   8  -2   0   51.50    4.51 
  -8  -2   0   49.93    3.85 
   8  -2   0   52.61    5.73 
  -8  -2   0   52.71    4.09 
  -8   2   0   53.53    4.21 
   8   2   0   52.39    4.21 
   8   2   0   41.77    4.56 
  -8   2   0   58.73    5.52 
  -8   2   0   47.07    4.37 
   8   2   0   46.02    4.20 
  -9  -2   0   52.84    4.01 
   9  -2   0   52.22    6.82 
   9  -2   0   41.06    5.32 
   9  -2   0   52.70    5.32 
  -9  -2   0   55.53    4.93 
  -9  -2   0   47.44    4.19 
  -9  -2   0   53.36    4.75 
   9  -2   0   48.51    4.95 
   9   2   0   42.69    4.36 
   9   2   0   48.81    4.39 
   9   2   0   43.55    5.24 
  -9   2   0   50.02    5.87 
  -9   2   0   43.68    4.48 
   9   2   0   47.14    4.86 
  -9   2   0   42.23    4.53 
  10  -2   0   36.56    4.81 
  10  -2   0   42.96    5.41 
  10  -2   0   49.12    6.52 
 -10  -2   0   39.39    4.19 
 -10  -2   0   39.92    4.59 
  10  -2   0   37.86    5.63 
  10   2   0   38.96    4.54 
  10   2   0   42.14    5.05 
 -10   2   0   43.77    5.06 
 -10   2   0   39.77    4.91 
  10   2   0   34.11    4.46 
 -10   2   0   56.67    7.25 
  11  -2   0    9.49    5.07 
 -11  -2   0    5.47    2.62 
  11  -2   0    4.77    3.41 
  11  -2   0    9.42    4.36 
 -11   2   0    5.75    5.20 
  11   2   0    7.18    3.04 
  11   2   0    2.47    3.96 
 -11   2   0    8.39    3.46 
   0  -3   0   -0.25    0.53 
   0  -3   0    0.14    0.57 
   0  -3   0    0.66    0.98 
   0  -3   0   -0.49    0.72 
   0   3   0   -0.07    0.56 
   0   3   0    0.20    0.45 
   0   3   0   -0.17    0.66 
   0   3   0   -0.40    0.79 
   0   3   0   -0.32    0.65 
   1  -3   0  145.17    7.59 
  -1  -3   0  141.49    7.72 
   1  -3   0  137.20    7.88 
  -1  -3   0  142.30    7.47 
  -1  -3   0  147.47    7.57 
   1  -3   0  145.80    7.41 
   1  -3   0  145.76    7.69 
   1  -3   0  150.04    7.75 
  -1  -3   0  145.73    7.54 
  -1   3   0  143.00    7.66 
  -1   3   0  135.21    7.64 
   1   3   0  139.18    7.43 
   1   3   0  141.03    7.35 
  -1   3   0  144.95    7.61 
  -1   3   0  135.46    7.27 
   1   3   0  144.96    7.77 
   1   3   0  152.56    7.62 
   1   3   0  140.53    7.47 
  -1   3   0  137.32    7.76 
   2  -3   0  260.77   13.25 
  -2  -3   0  267.54   12.93 
   2  -3   0  265.88   13.10 
   2  -3   0  259.02   13.41 
  -2  -3   0  267.33   12.89 
   2  -3   0  269.84   12.74 
  -2  -3   0  262.53   12.90 
   2  -3   0  262.38   13.03 
  -2  -3   0  269.05   12.84 
  -2   3   0  249.58   13.16 
   2   3   0  255.00   12.83 
  -2   3   0  251.99   12.59 
   2   3   0  257.93   13.01 
   2   3   0  262.21   12.99 
  -2   3   0  239.28   13.09 
   2   3   0  243.13   12.62 
  -2   3   0  238.78   13.09 
  -2   3   0  251.35   13.13 
  -3  -3   0   11.74    1.51 
   3  -3   0   10.11    1.39 
  -3  -3   0   12.17    1.38 
   3  -3   0   10.18    1.66 
   3  -3   0   10.93    2.07 
  -3  -3   0   13.53    1.75 
   3  -3   0    7.78    1.28 
   3  -3   0   10.74    1.71 
  -3  -3   0    9.61    1.36 
   3   3   0   13.13    1.37 
  -3   3   0    7.87    1.55 
   3   3   0   12.40    1.72 
  -3   3   0   12.73    1.75 
  -3   3   0   12.63    1.41 
  -3   3   0   10.60    1.58 
   3   3   0   11.33    1.47 
  -3   3   0    9.79    1.64 
   3   3   0   11.01    1.22 
   4  -3   0   53.76    3.94 
  -4  -3   0   55.77    3.35 
  -4  -3   0   55.20    3.16 
  -4  -3   0   52.56    3.21 
   4  -3   0   55.29    3.90 
   4  -3   0   54.32    3.51 
   4  -3   0   57.81    3.64 
   4  -3   0   53.84    4.26 
  -4   3   0   45.06    3.62 
  -4   3   0   45.35    3.97 
  -4   3   0   46.67    3.40 
   4   3   0   46.34    3.03 
   4   3   0   48.33    3.78 
   4   3   0   44.67    3.24 
  -4   3   0   46.65    3.99 
   5  -3   0   64.84    4.62 
   5  -3   0   64.79    4.25 
   5  -3   0   60.94    5.26 
  -5  -3   0   58.64    4.00 
   5  -3   0   60.23    4.14 
  -5  -3   0   58.61    3.81 
  -5  -3   0   61.04    3.71 
   5  -3   0   64.56    4.76 
  -5  -3   0   62.80    3.90 
   5   3   0   61.07    3.94 
  -5   3   0   59.58    4.29 
  -5   3   0   59.52    4.87 
   5   3   0   63.22    3.69 
  -5   3   0   61.09    4.46 
  -5   3   0   66.31    4.78 
  -5   3   0   65.07    3.93 
   5   3   0   62.27    4.40 
   6  -3   0   70.34    6.14 
  -6  -3   0   65.69    4.44 
   6  -3   0   70.87    5.12 
  -6  -3   0   71.87    4.31 
   6  -3   0   73.52    4.95 
   6  -3   0   70.36    5.46 
   6  -3   0   67.74    4.79 
  -6  -3   0   69.38    4.46 
  -6  -3   0   70.43    4.78 
  -6   3   0   80.25    5.88 
   6   3   0   76.41    4.75 
  -6   3   0   77.81    5.29 
  -6   3   0   78.25    5.07 
   6   3   0   72.17    4.30 
  -6   3   0   74.29    4.69 
   6   3   0   77.64    5.18 
  -7  -3   0   46.01    3.57 
  -7  -3   0   45.09    3.24 
   7  -3   0   47.65    4.48 
   7  -3   0   40.08    5.43 
  -7  -3   0   41.51    3.87 
  -7  -3   0   43.60    3.48 
   7  -3   0   46.30    4.76 
   7   3   0   39.17    3.27 
  -7   3   0   44.16    4.23 
  -7   3   0   44.53    4.11 
   7   3   0   43.51    4.32 
  -7   3   0   40.94    3.68 
   7   3   0   41.40    3.82 
  -7   3   0   47.41    5.09 
  -8  -3   0   32.56    3.19 
   8  -3   0   36.26    5.04 
   8  -3   0   43.87    5.93 
   8  -3   0   37.21    4.38 
   8  -3   0   35.87    4.16 
  -8  -3   0   36.44    3.52 
   8  -3   0   31.85    4.27 
  -8  -3   0   34.28    3.67 
   8   3   0   31.09    4.03 
  -8   3   0   33.60    4.28 
  -8   3   0   33.37    4.61 
   8   3   0   35.06    3.34 
   8   3   0   31.01    4.08 
  -8   3   0   41.73    4.27 
   9  -3   0   19.55    3.47 
  -9  -3   0   26.80    3.75 
   9  -3   0   31.78    4.56 
   9  -3   0   25.14    3.84 
  -9  -3   0   22.43    2.58 
   9  -3   0   25.60    5.06 
  -9  -3   0   23.34    3.13 
  -9   3   0   22.09    4.67 
  -9   3   0   19.03    2.90 
   9   3   0   17.36    3.99 
   9   3   0   18.19    3.17 
  -9   3   0   16.36    2.96 
  10  -3   0   25.68    5.78 
  10  -3   0   22.77    4.28 
  10  -3   0   21.05    5.07 
 -10  -3   0   25.17    3.13 
 -10   3   0   26.30    5.80 
 -10   3   0   32.75    4.50 
  10   3   0   35.44    4.66 
   0  -4   0  159.99    8.73 
   0  -4   0  158.60    8.61 
   0  -4   0  155.77    8.69 
   0  -4   0  159.64    9.14 
   0   4   0  158.63    8.59 
   0   4   0  168.80    9.06 
   0   4   0  165.29    8.72 
   0   4   0  161.67    8.39 
   0   4   0  152.79    8.71 
   1  -4   0  103.87    5.89 
  -1  -4   0   98.45    5.95 
   1  -4   0   99.58    6.14 
   1  -4   0   99.85    6.78 
  -1  -4   0   98.19    5.90 
   1  -4   0   99.16    6.22 
  -1  -4   0   96.21    6.16 
  -1  -4   0   93.05    6.40 
   1  -4   0   94.91    5.95 
  -1   4   0  113.99    6.59 
  -1   4   0  108.62    5.86 
   1   4   0  108.92    5.92 
  -1   4   0  109.49    6.40 
   1   4   0  109.76    6.15 
   1   4   0  111.42    6.08 
  -1   4   0  109.42    6.12 
   1   4   0  108.07    6.48 
  -1   4   0  110.22    6.22 
   2  -4   0   94.38    5.79 
  -2  -4   0   92.69    5.72 
   2  -4   0  100.72    5.61 
   2  -4   0   93.41    5.35 
   2  -4   0   98.04    5.87 
  -2  -4   0   98.32    5.70 
   2  -4   0  103.92    6.56 
  -2  -4   0   95.14    5.33 
  -2  -4   0   98.37    5.36 
   2   4   0   81.64    5.29 
  -2   4   0   83.44    5.81 
   2   4   0   85.44    5.38 
   2   4   0   87.69    5.81 
  -2   4   0   92.28    6.12 
   2   4   0   83.85    5.15 
   2   4   0   84.23    5.27 
  -2   4   0   86.04    5.53 
  -2   4   0   86.79    5.52 
  -2   4   0   87.12    5.14 
   3  -4   0   10.80    2.71 
  -3  -4   0   10.17    1.82 
  -3  -4   0   10.00    1.49 
   3  -4   0    6.57    1.68 
  -3  -4   0   10.23    1.85 
   3  -4   0    9.03    1.56 
   3  -4   0    8.20    1.70 
  -3  -4   0   11.35    1.48 
   3  -4   0   13.96    2.00 
  -3   4   0   18.95    2.63 
  -3   4   0   18.55    2.43 
  -4  -4   0   19.58    2.10 
   4  -4   0   20.23    2.67 
  -4  -4   0   20.29    2.21 
  -4  -4   0   21.43    2.69 
   4  -4   0   15.25    3.23 
  -4  -4   0   21.03    2.50 
   4  -4   0   16.61    2.40 
   4  -4   0   17.90    2.46 
   4  -4   0   17.47    2.45 
  -4   4   0   19.19    3.07 
  -4   4   0   19.20    2.74 
   4   4   0   17.21    2.05 
   4   4   0   19.79    2.30 
   4   4   0   18.57    1.95 
  -4   4   0   18.59    2.95 
  -4   4   0   16.68    2.20 
  -4   4   0   18.69    2.57 
   4   4   0   20.49    2.61 
  -5  -4   0   95.93    5.57 
   5  -4   0   98.90    5.96 
  -5  -4   0   97.24    5.98 
   5  -4   0   91.98    7.07 
  -5  -4   0   98.35    5.38 
   5  -4   0   94.38    6.08 
   5  -4   0   93.63    6.50 
  -5  -4   0   99.35    5.65 
   5  -4   0  100.26    6.50 
   5   4   0   90.15    6.27 
  -5   4   0   87.44    6.07 
  -5   4   0   89.20    6.80 
  -5   4   0   96.38    6.32 
  -5   4   0   84.35    6.66 
  -5   4   0   85.79    5.51 
   5   4   0   89.29    5.34 
   5   4   0   90.86    5.73 
  -6  -4   0    9.72    1.93 
   6  -4   0    7.11    2.43 
  -6  -4   0   11.74    1.89 
   6  -4   0   12.34    2.42 
   6  -4   0   13.18    3.60 
  -6  -4   0   10.66    1.62 
   6  -4   0   13.03    2.80 
  -6  -4   0    9.61    2.25 
  -6   4   0   16.75    2.65 
  -6   4   0   15.94    2.61 
   6   4   0   18.80    3.00 
   6   4   0   14.10    1.76 
   6   4   0   15.74    2.28 
  -6   4   0   15.62    3.05 
  -6   4   0   20.89    2.79 
  -6   4   0   12.39    3.07 
   7  -4   0   20.55    3.35 
  -7  -4   0   22.36    2.70 
   7  -4   0   23.10    3.23 
  -7  -4   0   19.86    2.58 
   7  -4   0   20.87    3.13 
   7  -4   0   23.09    4.45 
   7  -4   0   19.43    3.25 
  -7  -4   0   19.56    2.43 
  -7   4   0   19.33    3.36 
  -7   4   0   17.74    3.77 
   7   4   0   18.42    2.57 
  -7   4   0   15.20    2.70 
   7   4   0   21.19    2.84 
  -7   4   0   18.21    2.61 
   7   4   0   18.03    3.37 
   8  -4   0   66.39    7.20 
  -8  -4   0   65.63    6.59 
  -8  -4   0   75.84    5.43 
   8  -4   0   73.30    6.37 
  -8  -4   0   71.29    4.82 
   8  -4   0   76.31    6.97 
   8  -4   0   63.03    8.31 
  -8  -4   0   60.80    5.15 
   8   4   0   77.70    7.31 
  -8   4   0   79.88    7.45 
   8   4   0   74.11    5.12 
  -8   4   0   78.63    6.46 
   9  -4   0   44.60    5.77 
  -9  -4   0   57.38    4.59 
   9  -4   0   46.86    6.96 
   9  -4   0   48.02    6.50 
  -9   4   0   45.83    6.02 
  -9   4   0   46.94    6.65 
   0  -5   0    1.28    1.19 
   0  -5   0    0.55    1.59 
   0  -5   0   -0.94    1.31 
   0  -5   0   -2.04    1.92 
   0   5   0   -1.30    1.10 
   0   5   0    0.91    1.47 
   0   5   0   -0.07    1.20 
   0   5   0    2.83    2.04 
   0   5   0   -0.37    1.46 
  -1  -5   0   17.99    3.00 
  -1  -5   0   17.56    2.68 
   1  -5   0   17.70    3.27 
  -1  -5   0   21.77    2.72 
  -1  -5   0   19.13    2.57 
   1  -5   0   19.95    2.56 
   1  -5   0   21.21    2.57 
   1   5   0   18.84    3.04 
   1   5   0   14.90    2.05 
  -1   5   0   15.04    2.21 
  -1   5   0   14.91    2.11 
   1   5   0   16.79    2.46 
   1   5   0   20.48    2.61 
  -1   5   0   16.83    3.09 
   1   5   0   16.21    2.33 
  -1   5   0   15.78    2.52 
  -2  -5   0   63.36    5.37 
  -2  -5   0   62.81    4.48 
   2  -5   0   58.59    5.99 
   2  -5   0   62.94    4.56 
   2  -5   0   66.84    4.85 
  -2  -5   0   59.88    4.48 
  -2  -5   0   58.13    4.97 
   2  -5   0   60.07    4.90 
   2   5   0   70.10    5.48 
   2   5   0   70.80    4.71 
  -2   5   0   63.67    4.84 
  -2   5   0   71.66    5.77 
  -2   5   0   69.38    4.44 
  -2   5   0   62.29    4.87 
   2   5   0   68.15    4.41 
  -2   5   0   73.26    5.36 
   2   5   0   71.83    4.73 
   2   5   0   61.54    4.66 
   3  -5   0   30.67    4.39 
  -3  -5   0   33.47    3.34 
   3  -5   0   39.14    4.22 
   3  -5   0   38.57    3.60 
  -3  -5   0   40.71    3.27 
  -3  -5   0   38.23    4.00 
  -3  -5   0   43.45    4.14 
   3  -5   0   41.20    3.86 
  -3   5   0   34.31    3.80 
   3   5   0   34.21    3.46 
  -3   5   0   26.69    3.72 
   3   5   0   34.36    3.45 
   3   5   0   32.80    3.08 
   3   5   0   32.00    3.25 
  -3   5   0   35.66    3.35 
  -3   5   0   35.68    4.87 
   3   5   0   35.45    4.15 
   4  -5   0   64.22    5.39 
   4  -5   0   63.91    4.71 
  -4  -5   0   64.14    4.41 
   4  -5   0   62.99    4.92 
   4  -5   0   64.36    6.85 
  -4  -5   0   66.83    4.83 
   4  -5   0   67.87    5.58 
  -4  -5   0   64.69    5.04 
  -4   5   0   53.05    4.82 
  -4   5   0   52.97    5.91 
   4   5   0   52.65    3.93 
   4   5   0   52.42    5.34 
   4   5   0   47.75    4.54 
   4   5   0   57.44    4.07 
  -4   5   0   55.40    4.28 
  -4   5   0   43.89    5.03 
   4   5   0   54.32    4.48 
   5  -5   0   52.91    5.55 
   5  -5   0   50.82    5.53 
  -5  -5   0   49.31    4.42 
  -5  -5   0   53.61    3.89 
   5  -5   0   50.55    4.68 
   5  -5   0   44.33    6.23 
  -5  -5   0   55.62    4.35 
  -5   5   0   52.09    4.16 
   5   5   0   51.75    4.48 
  -5   5   0   45.37    4.90 
   5   5   0   59.82    3.94 
  -5   5   0   54.43    6.40 
   5   5   0   51.00    3.61 
  -5   5   0   48.69    5.80 
   5   5   0   52.99    5.66 
   6  -5   0   28.98    4.27 
  -6  -5   0   24.61    3.50 
  -6  -5   0   27.44    3.92 
   6  -5   0   29.45    4.05 
  -6  -5   0   25.49    3.05 
   6  -5   0   26.94    3.65 
  -6  -5   0   26.74    3.26 
   6  -5   0   32.85    5.73 
  -6   5   0   23.42    3.59 
  -6   5   0   32.63    5.05 
   6   5   0   30.95    4.19 
   6   5   0   26.12    4.13 
   6   5   0   30.92    3.22 
  -6   5   0   32.09    3.96 
  -6   5   0   23.47    3.49 
   7  -5   0   44.48    5.58 
   7  -5   0   44.36    6.64 
  -7  -5   0   40.78    4.28 
   7  -5   0   36.99    5.04 
  -7  -5   0   43.91    3.67 
  -7  -5   0   49.72    4.70 
  -7   5   0   36.63    5.76 
   7   5   0   44.66    5.41 
  -7   5   0   39.06    5.57 
   7   5   0   28.61    3.73 
   8  -5   0   16.68    3.82 
   8  -5   0   21.03    5.94 
   8  -5   0   14.68    4.58 
  -8  -5   0   13.10    2.25 
  -8   5   0   20.59    4.28 
  -8   5   0   19.10    5.21 
   0  -6   0   54.35    4.77 
   0  -6   0   51.23    5.15 
   0  -6   0   60.60    6.29 
   0  -6   0   48.49    4.56 
   0   6   0   41.89    4.49 
   0   6   0   49.41    4.89 
   0   6   0   50.90    6.16 
   0   6   0   38.42    4.32 
   1  -6   0    9.21    3.65 
  -1  -6   0    6.91    3.30 
  -1  -6   0    9.34    2.50 
   1   6   0   14.61    2.49 
  -1   6   0   17.87    3.24 
   1   6   0   18.71    2.86 
  -1   6   0   16.96    2.64 
   1   6   0   18.05    3.68 
   1   6   0   18.91    2.72 
   1   6   0   17.50    3.04 
  -1   6   0   17.10    4.00 
  -1   6   0   15.15    2.80 
   2  -6   0   88.60    8.35 
  -2  -6   0   91.65    6.08 
  -2  -6   0   87.88    6.70 
  -2  -6   0   92.48    6.24 
  -2  -6   0   89.65    7.31 
   2  -6   0   92.10    6.53 
   2  -6   0   85.65    6.60 
  -2   6   0   81.23    6.68 
   2   6   0   86.60    6.11 
  -2   6   0   85.46    6.48 
   2   6   0   78.65    6.22 
  -2   6   0   79.23    5.80 
   2   6   0   85.25    6.13 
  -2   6   0   83.19    6.34 
   2   6   0   86.75    5.85 
  -2   6   0   80.43    7.85 
   3  -6   0   15.93    3.02 
  -3  -6   0   15.13    2.48 
   3  -6   0   15.99    2.72 
  -3  -6   0   17.89    3.41 
  -3  -6   0   13.47    3.22 
   3  -6   0   15.37    4.53 
   3  -6   0   12.37    2.77 
  -3  -6   0   12.01    2.49 
   3   6   0   16.65    2.52 
   3   6   0   21.03    3.90 
   3   6   0   18.59    2.76 
   3   6   0   19.05    2.68 
  -3   6   0   21.55    2.84 
  -3   6   0   19.60    3.73 
  -3   6   0   20.80    4.56 
  -4  -6   0    0.81    1.68 
   4  -6   0   -1.92    3.95 
   4  -6   0    2.58    2.47 
  -4  -6   0    1.52    2.14 
  -4  -6   0    1.28    2.69 
   4  -6   0    1.68    2.29 
   4   6   0    3.73    3.36 
   4   6   0    3.39    1.76 
  -4   6   0    3.65    2.21 
  -4   6   0    1.81    2.45 
   4   6   0    1.69    1.77 
  -4   6   0    1.94    3.14 
  -4   6   0   -1.56    4.17 
  -5  -6   0   47.06    5.01 
   5  -6   0   42.32    5.29 
  -5  -6   0   35.38    4.70 
   5  -6   0   43.74    6.91 
  -5  -6   0   42.99    4.17 
   5  -6   0   43.74    6.26 
  -5   6   0   47.18    5.97 
   5   6   0   45.33    3.91 
   5   6   0   48.46    5.74 
  -5   6   0   46.75    5.89 
   5   6   0   48.62    4.36 
  -6  -6   0   32.66    3.94 
   6  -6   0   21.95    4.66 
  -6  -6   0   35.61    4.03 
   6  -6   0   41.66    7.15 
   6  -6   0   31.95    4.23 
  -6   6   0   36.62    5.98 
   6   6   0   28.34    4.03 
  -6   6   0   24.09    4.76 
   7  -6   0    7.49    6.85 
   7  -6   0   12.07    4.76 
  -7  -6   0    6.44    2.23 
   7  -6   0    4.92    3.78 
  -7   6   0    6.11    3.94 
  -7   6   0    2.11    4.85 
   0  -7   0   -1.55    4.22 
   0  -7   0   -1.10    3.12 
   0  -7   0    0.28    2.48 
   0   7   0    3.25    4.84 
   0   7   0    0.90    3.04 
   0   7   0    1.22    2.54 
   1  -7   0    3.75    2.52 
  -1  -7   0    9.29    2.65 
  -1  -7   0    4.20    3.35 
   1  -7   0   10.14    3.62 
   1  -7   0    3.43    5.07 
  -1  -7   0    5.89    4.51 
  -1   7   0    7.82    3.64 
  -1   7   0    1.23    4.84 
   1   7   0    4.77    4.85 
   1   7   0   10.99    2.98 
   1   7   0    9.42    3.29 
  -1   7   0    6.82    2.93 
   2  -7   0   -3.40    4.96 
  -2  -7   0    0.21    4.12 
   2  -7   0   -0.99    2.81 
  -2  -7   0    3.95    2.57 
  -2   7   0    1.87    3.17 
  -2   7   0   -3.39    5.13 
   2   7   0    2.80    4.77 
   2   7   0   -1.11    2.37 
  -2   7   0   -0.86    3.08 
   2   7   0    0.60    2.55 
   3  -7   0   31.53    5.05 
   3  -7   0   21.26    3.92 
  -3  -7   0   20.44    4.71 
  -3  -7   0   26.57    3.56 
   3  -7   0   17.96    6.04 
   3   7   0   26.90    3.65 
  -3   7   0   32.72    5.19 
  -3   7   0   27.69    4.65 
   3   7   0   25.17    3.51 
   4  -7   0   31.36    5.20 
  -4  -7   0   37.89    5.02 
   4  -7   0   36.18    4.84 
   4  -7   0   32.37    7.26 
  -4   7   0   40.95    5.15 
   4   7   0   40.19    4.77 
  -4   7   0   27.26    5.37 
  -5  -7   0   21.44    3.26 
   5  -7   0   21.05    5.06 
   5  -7   0   20.48    4.13 
   5  -7   0   19.47    7.44 
   5   7   0   23.80    3.23 
  -5   7   0   22.69    5.39 
  -5   7   0   20.80    5.58 
  11   0  -1   13.45    3.63 
  11   0  -1    7.85    4.25 
 -11   0   1   11.23    2.84 
  11   0  -1    5.67    2.91 
 -11   0   1    9.52    4.01 
  10   0  -1   36.65    4.72 
  10   0  -1   33.60    4.06 
 -10   0   1   34.47    4.38 
  10   0  -1   26.88    3.70 
 -10   0   1   29.71    4.01 
 -10   0   1   33.64    3.76 
   9   0  -1   57.30    4.73 
  -9   0   1   56.53    4.11 
   9   0  -1   55.18    4.46 
   9   0  -1   52.73    5.35 
   9   0  -1   55.28    4.34 
   9   0  -1   54.28    4.52 
  -9   0   1   51.75    5.12 
  -9   0   1   54.38    4.32 
   8   0  -1   32.08    3.20 
  -8   0   1   31.94    2.89 
  -8   0   1   31.53    2.97 
  -8   0   1   31.60    3.62 
   8   0  -1   33.08    3.42 
   8   0  -1   32.58    2.92 
   8   0  -1   32.97    3.64 
   7   0  -1    6.22    1.17 
   7   0  -1    8.18    1.87 
  -7   0   1    8.07    1.33 
   7   0  -1    7.08    1.42 
   7   0  -1    6.88    1.45 
   7   0  -1    6.23    1.47 
  -7   0   1    7.36    1.38 
  -7   0   1    7.66    1.75 
  -6   0   1    1.93    0.78 
   6   0  -1    2.43    1.00 
   6   0  -1    2.48    1.01 
  -6   0   1    2.18    1.12 
   6   0  -1    2.19    1.25 
  -6   0   1    2.79    0.90 
   6   0  -1    3.22    0.80 
   6   0  -1    2.63    1.01 
   5   0  -1   75.50    4.22 
   5   0  -1   73.44    4.15 
  -5   0   1   73.29    4.16 
   5   0  -1   74.86    4.11 
   5   0  -1   70.41    4.34 
  -5   0   1   70.24    4.23 
   5   0  -1   71.50    4.19 
  -5   0   1   72.55    4.07 
   4   0  -1  473.33   22.10 
   4   0  -1  464.23   22.21 
   4   0  -1  478.86   22.67 
   4   0  -1  469.61   22.59 
  -4   0   1  474.39   22.62 
   4   0  -1  446.67   22.15 
  -4   0   1  456.61   22.58 
  -4   0   1  457.83   22.12 
   3   0  -1   51.71    3.04 
   3   0  -1   52.29    2.99 
   3   0  -1   54.04    2.91 
   3   0  -1   56.33    2.99 
   3   0  -1   52.86    2.91 
  -3   0   1   54.60    2.93 
  -3   0   1   53.97    2.92 
   2   0  -1    8.45    0.69 
  -2   0   1    8.58    0.78 
   2   0  -1    8.68    0.75 
   2   0  -1    8.45    0.77 
   2   0  -1    8.82    0.71 
  -2   0   1    8.86    0.74 
   2   0  -1    8.72    0.68 
  -2   0   1    8.78    0.70 
   1   0  -1   34.35    1.68 
   1   0  -1   32.59    1.67 
   1   0  -1   32.29    1.65 
   1   0   1  279.37   13.41 
   1   0   1  287.15   13.08 
  -1   0  -1  278.03   13.41 
   1   0   1  268.27   13.40 
   2   0   1  200.49    9.88 
   2   0   1  191.20    9.86 
  -2   0  -1  208.09    9.88 
  -2   0  -1  204.96    9.68 
   2   0   1  195.34    9.67 
  -2   0  -1  208.42    9.89 
   2   0   1  200.21    9.68 
   3   0   1   82.23    4.30 
   3   0   1   79.79    4.32 
  -3   0  -1   82.65    4.34 
  -3   0  -1   80.14    4.31 
  -3   0  -1   81.76    4.35 
   3   0   1   83.48    4.35 
  -4   0  -1  124.50    6.93 
  -4   0  -1  135.83    6.95 
   4   0   1  136.11    6.94 
   4   0   1  135.32    7.01 
   4   0   1  133.23    6.87 
   4   0   1  132.45    6.94 
  -4   0  -1  141.28    6.98 
  -5   0  -1  557.90   27.18 
   5   0   1  571.47   27.13 
  -5   0  -1  567.50   27.72 
   5   0   1  571.37   27.79 
   5   0   1  571.42   27.74 
   5   0   1  571.81   27.15 
  -5   0  -1  567.04   27.74 
   6   0   1   22.99    2.32 
  -6   0  -1   23.43    2.12 
   6   0   1   22.97    2.08 
   6   0   1   23.00    2.22 
  -6   0  -1   22.77    2.15 
   6   0   1   22.92    2.30 
  -6   0  -1   21.74    2.46 
   6   0   1   20.11    2.50 
   7   0   1   31.77    2.97 
   7   0   1   33.25    2.92 
  -7   0  -1   32.18    2.76 
  -7   0  -1   31.65    2.83 
  -7   0  -1   33.08    3.30 
   7   0   1   31.45    3.03 
   7   0   1   29.31    3.29 
   7   0   1   27.70    2.63 
   8   0   1   99.07    6.16 
   8   0   1   91.61    6.02 
   8   0   1   96.23    5.96 
  -8   0  -1   90.60    6.19 
  -8   0  -1   90.26    6.20 
  -8   0  -1   99.36    5.77 
   8   0   1   92.97    5.80 
  -9   0  -1    4.47    1.76 
   9   0   1    5.07    2.64 
   9   0   1    5.76    2.29 
   9   0   1    7.99    2.22 
   9   0   1    3.08    1.88 
   9   0   1    6.81    1.78 
  -9   0  -1    4.85    2.60 
  -9   0  -1    9.86    1.99 
  10   0   1    6.90    2.94 
  10   0   1    5.59    3.11 
  10   0   1    3.09    2.17 
 -10   0  -1    0.14    3.09 
 -10   0  -1    2.61    2.17 
  10   0   1    4.95    2.72 
 -10   0  -1    4.29    2.00 
  11   0   1   -1.31    3.17 
  11   0   1   -2.31    3.84 
 -11   0  -1    0.07    2.61 
  11   0   1    7.39    3.00 
 -11   0  -1   -2.20    4.02 
 -11  -1   1   89.76    6.95 
  11  -1  -1   93.88    8.59 
  11  -1  -1   92.52    9.68 
  11  -1  -1   97.18    7.84 
  11   1  -1  101.57    7.44 
 -11   1   1  107.92    9.57 
  11   1  -1  101.42    8.81 
 -11   1   1  107.37    7.58 
 -10  -1   1   72.63    5.02 
  10  -1  -1   68.50    6.21 
 -10  -1   1   68.17    4.97 
  10  -1  -1   58.25    7.25 
  10  -1  -1   74.99    5.94 
  10  -1  -1   65.70    5.58 
 -10  -1   1   61.97    5.97 
  10   1  -1   66.92    6.03 
 -10   1   1   60.79    6.99 
  10   1  -1   54.87    5.21 
  10   1  -1   59.90    5.42 
 -10   1   1   58.64    5.21 
 -10   1   1   54.08    5.42 
  10   1  -1   57.59    5.96 
   9  -1  -1   29.87    4.14 
   9  -1  -1   37.08    3.46 
   9  -1  -1   37.04    4.46 
  -9  -1   1   33.81    3.30 
   9  -1  -1   32.60    3.82 
  -9  -1   1   33.44    3.35 
   9  -1  -1   33.10    4.45 
  -9  -1   1   33.83    4.01 
   9   1  -1   30.17    3.66 
   9   1  -1   37.98    3.72 
  -9   1   1   32.67    3.45 
   9   1  -1   33.58    3.77 
   9   1  -1   33.26    4.09 
  -9   1   1   29.82    3.99 
  -9   1   1   34.43    3.84 
   9   1  -1   36.93    3.69 
   8  -1  -1   31.37    3.41 
   8  -1  -1   38.28    3.76 
   8  -1  -1   31.56    3.06 
  -8  -1   1   34.57    2.95 
  -8  -1   1   35.11    3.44 
   8  -1  -1   28.55    3.41 
  -8  -1   1   34.76    2.96 
   8   1  -1   31.59    3.55 
   8   1  -1   34.88    3.38 
   8   1  -1   33.61    3.20 
  -8   1   1   33.02    3.07 
   8   1  -1   32.44    3.23 
  -8   1   1   33.25    3.91 
   8   1  -1   32.05    3.09 
  -7  -1   1    2.58    0.99 
  -7  -1   1    4.34    1.43 
   7  -1  -1    3.57    1.41 
   7  -1  -1    5.41    1.51 
   7  -1  -1    5.10    1.89 
   7  -1  -1    3.19    1.06 
   7  -1  -1    3.91    1.26 
  -7  -1   1    4.16    1.09 
   7   1  -1    5.65    1.33 
   7   1  -1    5.49    1.27 
  -7   1   1    5.33    1.47 
   7   1  -1    3.77    1.25 
   7   1  -1    4.72    1.44 
  -7   1   1    3.65    1.07 
  -7   1   1    5.39    1.75 
  -6  -1   1   36.63    2.42 
   6  -1  -1   36.94    2.81 
  -6  -1   1   32.78    2.37 
  -6  -1   1   38.29    2.63 
   6  -1  -1   38.05    2.62 
   6  -1  -1   30.73    2.69 
   6  -1  -1   36.59    2.99 
   6  -1  -1   33.58    3.37 
   6   1  -1   29.61    2.41 
   6   1  -1   30.74    2.43 
  -6   1   1   30.38    3.13 
   6   1  -1   27.62    2.60 
  -6   1   1   32.27    2.69 
  -6   1   1   28.90    2.66 
   6   1  -1   30.36    2.61 
   5  -1  -1   81.60    4.73 
   5  -1  -1   87.99    4.84 
  -5  -1   1   86.22    4.53 
   5  -1  -1   85.48    4.94 
   5  -1  -1   84.72    4.72 
  -5  -1   1   80.06    4.52 
   5  -1  -1   82.13    5.21 
  -5  -1   1   86.77    4.59 
   5   1  -1   78.64    4.60 
   5   1  -1   82.01    4.58 
  -5   1   1   85.05    4.68 
   5   1  -1   81.70    4.74 
  -5   1   1   78.65    4.79 
  -5   1   1   82.98    4.73 
  -5   1   1   83.66    5.02 
   4  -1  -1  108.28    5.80 
  -4  -1   1  109.98    5.60 
   4  -1  -1  108.14    5.74 
   4  -1  -1  104.25    6.11 
   4  -1  -1  112.42    5.85 
  -4  -1   1  107.87    5.59 
   4  -1  -1  105.51    5.94 
   4   1  -1  107.61    5.59 
  -4   1   1  110.92    5.68 
  -4   1   1  113.85    5.85 
  -4   1   1  107.60    5.97 
   4   1  -1  111.02    5.66 
  -4   1   1  106.77    5.87 
   4   1  -1  113.93    5.63 
   3  -1  -1  138.06    7.08 
   3  -1  -1  135.13    6.96 
   3  -1  -1  146.02    7.16 
   3  -1  -1  128.76    7.25 
  -3  -1   1  139.83    6.91 
   3  -1  -1  139.26    7.23 
  -3  -1   1  139.13    6.91 
  -3  -1   1  139.26    6.79 
  -3   1   1  142.29    6.93 
   3   1  -1  146.91    6.86 
  -3   1   1  138.05    7.15 
  -3   1   1  133.10    7.15 
   3   1  -1  137.57    6.89 
  -3   1   1  137.99    7.17 
   3   1  -1  145.71    6.96 
  -3   1   1  143.27    7.19 
  -2  -1   1  396.71   19.77 
   2  -1  -1  397.85   19.97 
   2  -1  -1  388.67   19.65 
   2  -1  -1  400.21   19.44 
   2  -1  -1  415.08   20.05 
  -2  -1   1  403.83   19.25 
   2  -1  -1  404.16   19.54 
   2   1  -1  429.44   19.33 
  -2   1   1  416.61   19.44 
  -2   1   1  404.28   19.59 
  -2   1   1  426.00   19.66 
  -2   1   1  425.98   20.03 
   2   1  -1  422.19   19.80 
   2   1  -1  414.19   19.76 
  -2   1   1  434.49   20.03 
   1  -1  -1  191.78    7.70 
  -1   1   1  155.86    7.38 
  -1   1   1  150.58    7.55 
   1   1  -1  147.72    7.27 
  -1   1   1  141.17    7.59 
  -1   1   1  144.64    7.49 
  -1   1   1  153.96    7.60 
   1   1  -1  150.26    7.46 
   1   1  -1  145.79    7.42 
   1   1  -1  149.97    7.34 
   0  -1   1   97.16    4.94 
   0  -1   1   99.03    4.77 
   0  -1   1  104.52    4.94 
   0  -1  -1   99.74    4.85 
   0  -1  -1   96.48    4.91 
   0  -1   1  100.34    4.87 
   0  -1   1  100.33    4.92 
   0  -1  -1   97.81    4.96 
   0  -1  -1  103.22    5.00 
   0   1  -1   96.70    4.76 
   0   1  -1   98.83    4.91 
   0   1  -1  100.14    4.92 
   0   1   1   96.97    4.85 
   0   1  -1   95.30    4.94 
   0   1  -1   99.93    4.87 
   0   1   1   95.77    4.90 
   0   1   1   97.02    4.99 
   0   1   1  102.17    5.02 
  -1  -1  -1  121.92    6.23 
   1  -1   1  119.78    6.20 
   1  -1   1  118.92    6.31 
   1  -1   1  117.44    6.26 
  -1  -1  -1  113.91    6.20 
   1  -1   1  118.68    6.30 
  -1  -1  -1  115.65    6.10 
   1  -1   1  115.22    6.02 
  -1   1  -1  126.71    6.24 
  -1   1  -1  132.17    6.30 
  -1   1  -1  135.38    6.33 
   1   1   1  129.75    6.21 
  -1   1  -1  138.39    6.05 
   1   1   1  134.70    6.23 
  -1   1  -1  133.22    6.31 
   1   1   1  136.93    6.28 
   1   1   1  125.76    6.10 
   2  -1   1  146.14    7.19 
  -2  -1  -1  149.81    6.86 
   2  -1   1  144.44    7.07 
   2  -1   1  140.62    7.00 
  -2  -1  -1  142.57    6.95 
  -2  -1  -1  144.97    6.95 
   2  -1   1  150.50    6.84 
  -2  -1  -1  150.66    6.83 
   2  -1   1  142.62    7.14 
  -2   1  -1  131.82    7.07 
  -2   1  -1  129.07    6.76 
   2   1   1  131.77    6.96 
  -2   1  -1  129.66    7.03 
  -2   1  -1  133.25    7.08 
   2   1   1  135.07    6.89 
  -2   1  -1  129.97    7.03 
   3  -1   1   28.22    2.21 
   3  -1   1   29.28    1.91 
   3  -1   1   26.87    1.97 
   3  -1   1   27.62    2.06 
  -3  -1  -1   26.83    1.74 
  -3  -1  -1   28.56    1.82 
  -3  -1  -1   27.61    1.73 
  -3  -1  -1   26.03    1.74 
   3  -1   1   29.42    1.86 
   4  -1   1   75.97    4.32 
  -4  -1  -1   75.99    4.17 
  -4  -1  -1   76.01    4.13 
   4  -1   1   73.08    4.36 
  -4  -1  -1   75.39    4.16 
   4  -1   1   76.33    4.23 
   4  -1   1   71.64    4.59 
   4  -1   1   77.16    4.47 
  -4   1  -1   78.73    4.55 
  -4   1  -1   76.25    4.38 
   4   1   1   78.01    4.22 
  -4   1  -1   75.87    4.20 
   4   1   1   78.02    4.29 
   4   1   1   73.12    4.12 
   5  -1   1  112.82    6.46 
   5  -1   1  110.78    6.20 
  -5  -1  -1  108.32    6.12 
  -5  -1  -1  109.47    6.12 
   5  -1   1  106.79    6.61 
   5  -1   1  110.09    6.26 
  -5  -1  -1  112.79    6.09 
   5   1   1  122.74    6.23 
   5   1   1  118.16    6.28 
  -5   1  -1  112.53    6.34 
  -5   1  -1  122.45    6.31 
  -5   1  -1  119.65    6.57 
  -5   1  -1  119.01    6.24 
   5   1   1  118.52    6.13 
   6  -1   1  202.15   11.14 
  -6  -1  -1  197.10   10.78 
   6  -1   1  206.72   10.79 
  -6  -1  -1  207.38   10.78 
   6  -1   1  208.98   10.92 
  -6  -1  -1  203.41   10.69 
   6  -1   1  216.69   10.93 
   6  -1   1  201.80   11.28 
  -6   1  -1  224.61   10.96 
   6   1   1  208.23   10.82 
  -6   1  -1  210.28   11.05 
  -6   1  -1  217.18   11.17 
   6   1   1  220.50   10.91 
   6   1   1  212.29   10.83 
   7  -1   1  224.80   10.78 
   7  -1   1  214.74   11.12 
   7  -1   1  216.33   10.80 
  -7  -1  -1  211.00   10.67 
   7  -1   1  201.22   11.30 
  -7  -1  -1  213.25   10.64 
   7  -1   1  214.68   10.84 
  -7  -1  -1  197.73   10.63 
   7   1   1  185.35   10.54 
  -7   1  -1  205.59   10.76 
   7   1   1  190.50   10.65 
   7   1   1  196.72   10.71 
   7   1   1  188.79   10.65 
  -7   1  -1  189.05   11.05 
  -7   1  -1  191.00   10.85 
  -8  -1  -1   29.13    3.04 
   8  -1   1   27.77    3.48 
   8  -1   1   26.80    3.79 
   8  -1   1   28.14    3.41 
  -8  -1  -1   29.83    3.47 
   8  -1   1   28.71    3.71 
   8   1   1   33.29    3.22 
  -8   1  -1   33.87    3.19 
   8   1   1   36.57    3.36 
  -8   1  -1   29.24    3.63 
   8   1   1   32.24    3.73 
  -8   1  -1   34.10    3.39 
   8   1   1   37.30    3.36 
  -9  -1  -1    5.81    1.80 
  -9  -1  -1    4.51    2.39 
   9  -1   1    6.26    2.60 
   9  -1   1    4.55    1.98 
   9  -1   1    0.48    2.82 
   9  -1   1    4.21    2.41 
  -9  -1  -1    4.77    1.77 
  -9   1  -1    2.98    2.75 
  -9   1  -1    5.52    1.95 
   9   1   1    4.82    1.99 
   9   1   1    5.21    2.37 
   9   1   1    4.05    1.94 
   9   1   1    2.85    1.98 
   9   1   1    3.08    2.39 
  -9   1  -1    1.74    1.75 
  10  -1   1    4.31    3.76 
  10  -1   1    7.26    3.03 
 -10  -1  -1    3.03    2.89 
 -10  -1  -1    1.08    1.98 
  10  -1   1    3.94    2.44 
 -10  -1  -1    3.40    2.13 
  10  -1   1    2.97    2.91 
  10   1   1    3.85    3.09 
  10   1   1    1.18    2.94 
  10   1   1    2.66    2.15 
 -10   1  -1    2.66    3.23 
 -10   1  -1    3.42    2.39 
  10   1   1    1.93    2.49 
 -10   1  -1    4.60    2.51 
  11  -1   1   19.34    5.43 
  11  -1   1   20.35    3.86 
 -11  -1  -1   20.89    3.49 
 -11  -1  -1   30.34    5.50 
 -11   1  -1   25.51    3.96 
 -11   1  -1   21.72    5.36 
  11   1   1   23.01    3.71 
  11   1   1   21.50    4.73 
  11  -2  -1   24.63    4.35 
  11  -2  -1   18.30    4.69 
  11  -2  -1   13.10    5.45 
 -11  -2   1   19.61    3.08 
 -11   2   1   17.19    3.70 
  11   2  -1   14.52    3.37 
  11   2  -1   15.89    4.13 
 -11   2   1   20.17    5.41 
 -10  -2   1   18.95    3.37 
  10  -2  -1   18.21    4.53 
  10  -2  -1   21.00    4.14 
  10  -2  -1   11.88    3.10 
 -10  -2   1   15.91    2.49 
  10  -2  -1   14.32    3.62 
  10   2  -1   13.43    3.21 
  10   2  -1   15.66    2.94 
 -10   2   1   16.51    4.23 
 -10   2   1   14.58    3.02 
 -10   2   1   14.38    2.82 
  10   2  -1   17.09    3.12 
   9  -2  -1   76.89    7.17 
   9  -2  -1   74.12    6.04 
  -9  -2   1   77.45    5.12 
   9  -2  -1   85.19    6.83 
  -9  -2   1   73.80    5.24 
  -9  -2   1   75.08    5.66 
   9  -2  -1   76.47    6.23 
   9   2  -1   82.35    5.68 
   9   2  -1   75.58    5.83 
  -9   2   1   83.92    5.76 
   9   2  -1   78.78    5.89 
   9   2  -1   81.57    6.15 
  -9   2   1   85.12    7.33 
  -9   2   1   82.33    6.05 
   9   2  -1   76.14    5.42 
  -8  -2   1   30.33    2.85 
  -8  -2   1   34.16    3.29 
   8  -2  -1   37.28    4.24 
   8  -2  -1   35.55    3.85 
  -8  -2   1   29.95    3.17 
  -8  -2   1   33.16    2.82 
   8  -2  -1   34.43    4.64 
   8  -2  -1   30.31    3.62 
   8   2  -1   26.43    3.67 
   8   2  -1   24.79    3.25 
   8   2  -1   30.83    3.10 
   8   2  -1   22.60    3.08 
  -8   2   1   31.24    3.56 
  -8   2   1   27.81    3.85 
  -8   2   1   27.75    3.46 
  -7  -2   1    4.71    1.37 
  -7  -2   1    3.29    1.08 
   7  -2  -1    4.61    1.73 
  -7  -2   1    4.04    1.09 
   7  -2  -1    2.64    1.54 
   7  -2  -1    3.07    1.99 
  -7  -2   1    2.72    1.34 
   7  -2  -1    2.13    1.48 
   7   2  -1    0.96    1.17 
   7   2  -1    1.34    1.43 
   7   2  -1    1.17    1.31 
  -7   2   1    3.07    1.44 
  -7   2   1    2.74    1.84 
  -7   2   1    2.10    1.33 
  -6  -2   1   45.84    3.19 
   6  -2  -1   42.15    3.35 
  -6  -2   1   44.88    3.15 
   6  -2  -1   44.41    3.68 
  -6  -2   1   42.11    2.93 
  -6  -2   1   43.69    3.00 
   6  -2  -1   42.63    3.46 
   6  -2  -1   43.69    4.32 
   6  -2  -1   40.82    3.79 
  -6   2   1   50.76    3.54 
  -6   2   1   54.65    3.70 
  -6   2   1   51.95    4.21 
   6   2  -1   51.13    3.52 
  -6   2   1   50.09    3.32 
   6   2  -1   53.77    3.33 
   6   2  -1   51.42    3.04 
   5  -2  -1   40.73    2.91 
   5  -2  -1   39.85    3.48 
   5  -2  -1   41.04    3.25 
  -5  -2   1   40.63    2.64 
  -5  -2   1   41.24    2.48 
   5  -2  -1   40.75    3.08 
  -5  -2   1   42.51    2.64 
   5  -2  -1   42.63    2.97 
  -5  -2   1   42.49    2.54 
  -5   2   1   38.37    2.97 
  -5   2   1   32.97    2.63 
  -5   2   1   33.81    3.31 
  -5   2   1   37.12    3.01 
   5   2  -1   37.23    2.59 
   5   2  -1   36.89    2.81 
  -5   2   1   35.59    3.18 
   4  -2  -1  310.93   16.24 
   4  -2  -1  313.99   16.27 
  -4  -2   1  311.31   15.72 
  -4  -2   1  323.21   15.70 
  -4  -2   1  326.39   15.46 
   4  -2  -1  314.30   15.67 
   4  -2  -1  326.62   15.91 
   4  -2  -1  319.77   16.08 
  -4   2   1  316.77   16.12 
  -4   2   1  327.87   16.12 
  -4   2   1  325.87   16.21 
  -4   2   1  312.09   15.99 
   4   2  -1  329.14   15.62 
   4   2  -1  330.71   15.84 
   4   2  -1  319.31   15.69 
  -4   2   1  334.74   15.60 
  -3  -2   1  116.27    5.95 
   3  -2  -1  123.79    6.44 
   3  -2  -1  114.80    6.31 
   3  -2  -1  113.82    6.13 
   3  -2  -1  116.60    6.69 
  -3  -2   1  117.55    6.01 
   3  -2  -1  115.62    6.48 
  -3  -2   1  108.03    6.00 
  -3  -2   1  113.15    5.99 
   3   2  -1  121.03    5.98 
   3   2  -1  118.72    6.09 
   3   2  -1  123.78    6.17 
  -3   2   1  123.87    6.59 
  -3   2   1  122.31    6.41 
  -3   2   1  116.35    6.53 
   3   2  -1  121.15    5.83 
  -3   2   1  122.37    6.42 
  -3   2   1  124.05    6.09 
   2  -2  -1    9.37    1.12 
   2  -2  -1    9.93    1.50 
   2  -2  -1   11.98    1.39 
  -2  -2   1   10.32    0.94 
  -2  -2   1   10.31    0.96 
   2  -2  -1   10.88    1.19 
  -2  -2   1    9.12    1.12 
   2  -2  -1   10.78    1.32 
  -2  -2   1    9.93    1.07 
   2   2  -1   11.13    1.25 
   2   2  -1   10.47    0.99 
   2   2  -1   11.13    1.01 
  -2   2   1    9.43    1.19 
   2   2  -1   10.49    0.88 
  -2   2   1   10.26    1.23 
  -2   2   1   11.15    1.07 
  -2   2   1    7.70    1.23 
  -2   2   1   10.49    1.43 
  -1  -2   1   82.07    4.01 
   1  -2  -1   85.66    4.05 
  -1  -2   1   74.94    4.21 
  -1  -2   1   79.64    4.02 
  -1  -2   1   78.64    3.96 
   1  -2  -1   80.09    4.23 
   1  -2  -1   80.17    4.23 
   1  -2  -1   80.25    4.12 
   1  -2  -1   83.51    4.50 
   1   2  -1   69.13    3.95 
   1   2  -1   61.50    3.91 
   1   2  -1   69.20    3.97 
  -1   2   1   70.26    4.08 
  -1   2   1   69.98    4.28 
  -1   2   1   66.69    4.16 
   1   2  -1   71.88    4.08 
  -1   2   1   71.32    3.93 
  -1   2   1   70.31    4.12 
   0  -2   1  124.52    6.49 
   0  -2   1  126.07    6.33 
   0  -2   1  122.47    6.47 
   0  -2   1  133.14    6.70 
   0  -2  -1  130.63    6.59 
   0  -2  -1  127.18    6.72 
   0  -2   1  128.63    6.58 
   0  -2  -1  132.16    6.57 
   0  -2  -1  125.57    6.41 
   0  -2  -1  128.72    6.61 
   0   2   1  130.90    6.63 
   0   2  -1  125.90    6.50 
   0   2  -1  125.43    6.30 
   0   2  -1  127.78    6.55 
   0   2   1  125.23    6.38 
   0   2  -1  128.03    6.58 
   0   2   1  126.63    6.55 
   0   2   1  130.80    6.72 
   0   2   1  121.91    6.52 
   0   2  -1  127.31    6.50 
  -1  -2  -1    5.69    1.01 
   1  -2   1    4.35    0.79 
  -1  -2  -1    5.56    0.77 
   1  -2   1    3.63    0.67 
  -1  -2  -1    4.87    0.73 
   1  -2   1    5.30    0.85 
   1  -2   1    5.21    1.01 
   1  -2   1    4.62    0.68 
  -1  -2  -1    3.97    0.75 
  -1   2  -1    5.31    0.91 
  -1   2  -1    5.10    0.82 
  -1   2  -1    5.37    1.00 
   1   2   1    5.84    0.81 
  -1   2  -1    6.50    0.88 
  -1   2  -1    5.60    0.74 
   1   2   1    5.04    0.78 
   1   2   1    4.06    0.64 
   1   2   1    5.98    1.02 
  -2  -2  -1  162.58    8.26 
   2  -2   1  156.61    8.50 
   2  -2   1  168.04    8.39 
  -2  -2  -1  169.25    8.29 
   2  -2   1  166.49    8.66 
   2  -2   1  166.13    8.41 
   2  -2   1  166.73    8.11 
  -2  -2  -1  163.99    8.23 
  -2  -2  -1  171.42    8.24 
   2   2   1  154.33    8.19 
  -2   2  -1  162.73    8.48 
   2   2   1  165.13    8.09 
  -2   2  -1  162.58    8.03 
   2   2   1  161.20    8.34 
  -2   2  -1  159.05    8.47 
  -2   2  -1  158.59    8.43 
   2   2   1  169.02    8.33 
  -2   2  -1  163.60    8.45 
   3  -2   1   36.96    2.66 
   3  -2   1   35.96    2.51 
   3  -2   1   36.69    3.19 
   3  -2   1   37.78    2.85 
  -3  -2  -1   38.06    2.48 
  -3  -2  -1   39.16    2.57 
  -3  -2  -1   37.12    2.56 
  -3  -2  -1   39.70    2.48 
   3  -2   1   41.34    2.86 
  -3   2  -1   47.39    2.90 
  -3   2  -1   46.08    3.06 
   3   2   1   43.91    2.61 
  -3   2  -1   41.62    2.76 
   3   2   1   39.97    2.43 
   3   2   1   47.48    2.89 
   3   2   1   45.12    2.43 
  -3   2  -1   41.74    2.48 
  -3   2  -1   48.50    3.18 
   4  -2   1  245.62   11.96 
   4  -2   1  243.05   12.03 
   4  -2   1  232.31   12.39 
   4  -2   1  245.24   11.68 
  -4  -2  -1  243.65   11.63 
  -4  -2  -1  244.76   11.80 
  -4  -2  -1  240.92   11.57 
  -4  -2  -1  243.05   11.74 
   4  -2   1  240.37   12.25 
  -4   2  -1  228.67   12.14 
  -4   2  -1  221.89   11.52 
  -4   2  -1  220.62   12.09 
   4   2   1  218.41   11.66 
   4   2   1  227.43   11.78 
  -4   2  -1  232.95   12.06 
   4   2   1  229.38   11.85 
  -5  -2  -1  158.96    8.53 
   5  -2   1  160.91    8.83 
  -5  -2  -1  157.77    8.45 
  -5  -2  -1  148.98    8.55 
   5  -2   1  162.56    8.66 
   5  -2   1  163.47    9.47 
  -5  -2  -1  164.26    8.62 
   5  -2   1  155.48    9.10 
   5  -2   1  158.92    8.81 
   5   2   1  185.46    8.81 
  -5   2  -1  157.78    8.63 
  -5   2  -1  179.45    9.09 
   5   2   1  175.54    8.56 
   5   2   1  179.10    8.89 
  -5   2  -1  169.78    9.19 
  -5   2  -1  175.69    8.95 
  -6  -2  -1   88.00    5.17 
   6  -2   1   90.76    6.31 
   6  -2   1   91.27    5.44 
   6  -2   1   93.40    5.88 
  -6  -2  -1   89.59    5.06 
  -6  -2  -1   92.97    5.24 
   6  -2   1   87.57    5.39 
   6  -2   1   90.63    5.63 
  -6  -2  -1   88.40    5.24 
  -6   2  -1   84.05    5.57 
   6   2   1   90.70    5.34 
  -6   2  -1   86.91    5.21 
   6   2   1   86.35    5.57 
   6   2   1   85.14    5.05 
  -6   2  -1   83.06    5.97 
  -7  -2  -1   48.20    3.73 
   7  -2   1   51.05    4.05 
  -7  -2  -1   52.27    3.42 
   7  -2   1   53.56    5.04 
   7  -2   1   49.98    4.15 
  -7  -2  -1   52.96    3.58 
  -7  -2  -1   52.03    3.77 
   7  -2   1   56.93    4.59 
  -7   2  -1   44.98    3.79 
  -7   2  -1   35.24    3.87 
   7   2   1   43.41    3.78 
  -7   2  -1   45.00    4.72 
   7   2   1   42.61    3.41 
   7   2   1   42.36    4.18 
  -8  -2  -1   78.87    5.25 
   8  -2   1   82.01    7.03 
   8  -2   1   77.21    5.87 
  -8  -2  -1   79.63    5.41 
   8  -2   1   85.30    6.10 
  -8  -2  -1   80.34    5.58 
   8  -2   1   82.37    6.36 
   8   2   1   84.09    5.80 
  -8   2  -1   94.10    6.07 
  -8   2  -1   93.83    5.73 
   8   2   1   73.88    6.20 
   8   2   1   86.09    5.76 
  -8   2  -1   96.06    6.96 
   9  -2   1   24.85    3.53 
  -9  -2  -1   19.66    2.75 
   9  -2   1   19.92    3.21 
  -9  -2  -1   23.62    3.10 
   9  -2   1   19.58    3.43 
  -9  -2  -1   22.11    3.21 
   9  -2   1   17.98    4.37 
  -9  -2  -1   21.24    3.22 
  -9   2  -1   21.75    4.03 
   9   2   1   19.34    2.76 
   9   2   1   15.29    3.40 
  -9   2  -1   24.91    3.24 
  -9   2  -1   18.60    2.93 
   9   2   1   20.91    2.81 
  10  -2   1   -0.73    3.51 
  10  -2   1    3.37    3.46 
  10  -2   1    8.81    2.99 
 -10  -2  -1    4.16    2.22 
  10  -2   1    3.79    4.23 
 -10  -2  -1    4.58    3.06 
 -10   2  -1    4.75    2.78 
  10   2   1    4.56    2.70 
  10   2   1    1.88    2.95 
 -10   2  -1    4.95    3.95 
 -10   2  -1    2.84    2.32 
  10   2   1    6.45    2.53 
  11  -2   1    3.70    3.70 
  11  -2   1   12.40    5.75 
  11  -2   1   13.92    4.73 
 -11  -2  -1   10.12    3.04 
  11   2   1   13.44    4.24 
 -11   2  -1   18.03    5.45 
 -11   2  -1   12.78    3.56 
  11   2   1   15.27    3.52 
  10  -3  -1   73.93    8.04 
  10  -3  -1   67.76    6.89 
 -10  -3   1   76.51    5.26 
  10  -3  -1   59.23    7.41 
  10  -3  -1   53.53    7.70 
  10   3  -1   70.12    6.22 
  10   3  -1   68.10    6.30 
 -10   3   1   72.35    6.54 
 -10   3   1   69.92    8.69 
   9  -3  -1    7.22    2.66 
  -9  -3   1    6.37    2.79 
   9  -3  -1    5.09    3.57 
  -9  -3   1    6.92    1.94 
   9  -3  -1    8.24    3.26 
  -9  -3   1    4.85    2.27 
  -9  -3   1    5.41    1.72 
   9   3  -1    0.24    2.25 
  -9   3   1    2.85    3.35 
   9   3  -1    3.04    3.06 
  -9   3   1    3.74    2.16 
  -8  -3   1   54.01    4.74 
   8  -3  -1   62.51    5.31 
   8  -3  -1   57.97    6.37 
   8  -3  -1   54.96    4.84 
   8  -3  -1   55.79    5.70 
   8  -3  -1   50.56    4.95 
  -8  -3   1   56.34    4.32 
  -8  -3   1   52.96    4.09 
  -8   3   1   55.00    4.99 
  -8   3   1   60.26    4.93 
  -8   3   1   57.47    6.29 
   8   3  -1   54.93    4.09 
   8   3  -1   56.10    4.70 
   8   3  -1   55.10    5.07 
   7  -3  -1   10.32    3.02 
  -7  -3   1    8.28    1.67 
   7  -3  -1    6.48    2.26 
  -7  -3   1    7.60    1.27 
  -7  -3   1    4.88    1.82 
   7  -3  -1    7.65    2.15 
  -7  -3   1    6.00    1.43 
  -7   3   1    2.93    1.51 
   7   3  -1    6.47    1.62 
  -7   3   1    4.37    1.89 
   7   3  -1    3.21    1.94 
   7   3  -1    3.51    1.20 
  -7   3   1    0.83    1.52 
  -7   3   1    5.14    2.68 
   6  -3  -1   88.08    5.44 
  -6  -3   1   81.31    4.86 
   6  -3  -1   92.72    5.93 
  -6  -3   1   87.20    4.96 
  -6  -3   1   83.57    4.75 
  -6  -3   1   82.15    5.13 
   6  -3  -1   82.81    5.39 
   6  -3  -1   87.44    5.91 
   6  -3  -1   80.49    6.48 
  -6   3   1   86.08    5.52 
  -6   3   1   84.13    6.22 
   6   3  -1   81.39    5.46 
   6   3  -1   80.99    4.75 
   6   3  -1   83.79    5.09 
  -6   3   1   79.11    5.61 
  -6   3   1   87.81    5.18 
  -6   3   1   83.53    5.99 
   5  -3  -1   27.96    3.29 
  -5  -3   1   29.34    2.24 
   5  -3  -1   28.54    2.82 
  -5  -3   1   30.45    2.71 
  -5  -3   1   30.35    2.48 
  -5  -3   1   26.03    2.31 
   5  -3  -1   27.70    3.14 
   5  -3  -1   24.12    3.38 
   5  -3  -1   26.52    2.85 
  -5   3   1   37.76    3.22 
  -5   3   1   36.87    3.61 
  -5   3   1   36.16    2.65 
   5   3  -1   37.00    3.05 
   5   3  -1   37.22    2.55 
  -5   3   1   32.78    3.05 
   5   3  -1   36.68    2.29 
  -5   3   1   38.34    3.57 
   4  -3  -1    8.03    1.44 
   4  -3  -1    8.76    2.02 
  -4  -3   1    6.28    1.10 
  -4  -3   1    7.29    0.97 
   4  -3  -1    9.41    1.69 
  -4  -3   1    6.35    1.17 
   4  -3  -1    7.65    1.40 
  -4  -3   1    7.20    1.06 
  -4   3   1    5.62    1.11 
  -4   3   1    4.24    1.25 
  -4   3   1    5.42    1.32 
  -4   3   1    7.03    1.78 
  -4   3   1    5.78    1.62 
   4   3  -1    7.72    1.56 
   4   3  -1    5.13    0.83 
   4   3  -1    5.21    0.88 
  -3  -3   1  287.19   13.60 
   3  -3  -1  275.31   14.42 
  -3  -3   1  287.50   13.70 
   3  -3  -1  286.48   14.03 
   3  -3  -1  273.38   13.65 
   3  -3  -1  289.34   14.09 
  -3  -3   1  284.36   13.60 
   3  -3  -1  283.98   14.29 
  -3  -3   1  275.94   13.73 
  -3   3   1  272.47   13.53 
  -3   3   1  254.83   14.10 
  -3   3   1  274.32   14.17 
  -3   3   1  278.56   14.15 
   3   3  -1  268.18   13.63 
   3   3  -1  270.01   13.78 
   3   3  -1  273.94   13.81 
   3   3  -1  256.92   13.32 
  -3   3   1  273.52   14.13 
   2  -3  -1  152.43    8.43 
  -2  -3   1  149.39    7.72 
   2  -3  -1  152.36    8.13 
  -2  -3   1  147.06    7.66 
   2  -3  -1  148.03    7.90 
  -2  -3   1  151.18    7.85 
   2  -3  -1  148.35    7.97 
   2  -3  -1  140.30    7.66 
  -2  -3   1  144.88    7.66 
  -2   3   1  139.71    8.01 
  -2   3   1  148.81    7.60 
  -2   3   1  147.70    8.20 
   2   3  -1  147.31    7.90 
   2   3  -1  148.74    7.62 
  -2   3   1  153.34    8.02 
  -2   3   1  149.18    7.96 
   2   3  -1  151.09    7.76 
   2   3  -1  151.14    7.59 
   1  -3  -1  133.81    7.65 
  -1  -3   1  129.58    7.03 
   1  -3  -1  125.42    7.26 
  -1  -3   1  123.90    7.25 
   1  -3  -1  128.96    7.27 
   1  -3  -1  132.36    7.04 
  -1  -3   1  129.42    7.11 
  -1  -3   1  135.40    7.10 
  -1   3   1  139.49    6.97 
  -1   3   1  130.80    7.30 
   1   3  -1  136.02    7.12 
   1   3  -1  143.11    7.31 
  -1   3   1  139.95    7.24 
   1   3  -1  140.23    7.10 
   1   3  -1  141.69    7.08 
  -1   3   1  137.04    7.29 
   1   3  -1  139.42    6.95 
  -1   3   1  136.62    7.46 
   0  -3   1  123.50    6.59 
   0  -3  -1  122.35    6.92 
   0  -3  -1  122.73    6.55 
   0  -3   1  124.41    6.60 
   0  -3  -1  129.36    6.75 
   0  -3   1  122.11    6.85 
   0  -3   1  121.74    6.50 
   0  -3  -1  124.03    6.64 
   0   3  -1  112.48    6.65 
   0   3   1  118.64    6.61 
   0   3   1  121.78    6.54 
   0   3   1  121.35    6.35 
   0   3   1  127.20    6.65 
   0   3  -1  124.50    6.58 
   0   3   1  123.67    6.86 
   0   3  -1  114.96    6.46 
   0   3  -1  122.62    6.29 
   0   3  -1  116.40    6.57 
  -1  -3  -1   33.16    2.51 
  -1  -3  -1   34.55    2.69 
  -1  -3  -1   35.25    2.52 
   1  -3   1   32.21    2.54 
   1  -3   1   33.83    2.66 
   1  -3   1   36.81    2.78 
  -1  -3  -1   31.30    2.93 
   1  -3   1   34.64    2.49 
   1  -3   1   36.01    3.18 
   1   3   1   44.12    3.11 
  -1   3  -1   39.93    2.46 
   1   3   1   39.15    2.63 
  -1   3  -1   40.52    2.68 
   1   3   1   41.93    2.59 
  -1   3  -1   39.11    2.93 
  -1   3  -1   38.91    2.68 
  -1   3  -1   40.16    3.07 
   1   3   1   38.19    2.52 
   1   3   1   40.83    2.75 
  -2  -3  -1   10.17    1.50 
   2  -3   1   11.06    1.43 
  -2  -3  -1    8.93    1.28 
   2  -3   1   10.78    1.90 
   2  -3   1   13.50    1.76 
  -2  -3  -1   11.25    1.33 
  -2  -3  -1   11.02    1.38 
   2  -3   1   11.16    1.52 
   2  -3   1   10.90    1.54 
  -2   3  -1    6.91    1.16 
   2   3   1    7.64    1.14 
   2   3   1    8.63    1.18 
  -2   3  -1    7.53    1.53 
   2   3   1    7.63    1.43 
  -2   3  -1    9.09    1.63 
  -2   3  -1    7.29    1.34 
  -2   3  -1    6.59    0.93 
   2   3   1    7.18    1.17 
   3  -3   1   48.22    3.46 
  -3  -3  -1   44.54    3.20 
  -3  -3  -1   44.21    3.21 
  -3  -3  -1   46.86    3.01 
   3  -3   1   50.89    3.31 
   3  -3   1   44.92    3.96 
   3  -3   1   45.35    3.08 
  -3  -3  -1   42.46    2.97 
   3  -3   1   47.57    3.54 
   3   3   1   47.67    2.99 
  -3   3  -1   50.23    3.33 
   3   3   1   51.24    3.62 
  -3   3  -1   50.52    3.75 
   3   3   1   46.88    3.09 
  -3   3  -1   47.02    2.93 
  -3   3  -1   44.98    3.57 
   3   3   1   44.72    2.89 
  -3   3  -1   45.48    3.33 
   4  -3   1   23.06    2.28 
  -4  -3  -1   24.80    2.11 
  -4  -3  -1   24.76    2.02 
   4  -3   1   20.65    2.55 
  -4  -3  -1   24.95    2.36 
   4  -3   1   22.39    2.71 
  -4  -3  -1   24.41    2.21 
   4  -3   1   23.79    3.08 
   4  -3   1   22.47    2.38 
   4   3   1   23.85    2.76 
   4   3   1   24.51    2.18 
  -4   3  -1   23.91    2.93 
  -4   3  -1   24.47    2.45 
   4   3   1   23.70    1.92 
  -4   3  -1   23.10    2.78 
  -4   3  -1   24.91    2.60 
  -5  -3  -1   31.83    2.41 
   5  -3   1   35.68    3.40 
  -5  -3  -1   32.83    2.69 
   5  -3   1   35.10    2.90 
  -5  -3  -1   30.98    2.86 
  -5  -3  -1   31.92    2.58 
   5  -3   1   33.05    2.90 
   5  -3   1   32.81    3.44 
   5  -3   1   29.78    4.05 
  -5   3  -1   26.23    2.88 
  -5   3  -1   30.00    3.39 
   5   3   1   28.43    2.33 
   5   3   1   27.23    2.62 
   5   3   1   30.86    3.31 
  -5   3  -1   27.96    3.09 
  -5   3  -1   27.69    2.51 
  -5   3  -1   28.22    3.57 
   6  -3   1  184.18   10.81 
   6  -3   1  184.96   10.30 
  -6  -3  -1  187.49   10.14 
   6  -3   1  192.99   10.19 
  -6  -3  -1  187.78   10.03 
  -6  -3  -1  187.68    9.82 
   6  -3   1  179.90   11.14 
   6  -3   1  195.23   10.54 
  -6  -3  -1  187.80    9.84 
   6   3   1  189.29    9.83 
   6   3   1  190.51   10.23 
  -6   3  -1  189.07   10.99 
  -6   3  -1  186.62    9.87 
  -6   3  -1  193.40   10.63 
   6   3   1  193.29   10.45 
  -6   3  -1  188.37   10.41 
   7  -3   1   62.67    5.66 
   7  -3   1   59.06    6.32 
  -7  -3  -1   67.18    4.67 
  -7  -3  -1   64.85    4.99 
  -7  -3  -1   58.28    4.51 
   7  -3   1   66.16    5.21 
  -7  -3  -1   63.46    4.25 
   7   3   1   70.07    4.93 
  -7   3  -1   69.74    5.12 
  -7   3  -1   63.91    5.91 
  -7   3  -1   71.95    5.32 
  -7   3  -1   65.30    4.73 
   7   3   1   68.56    5.73 
   7   3   1   64.99    4.34 
  -8  -3  -1   21.36    2.80 
   8  -3   1   19.08    3.41 
   8  -3   1   19.92    3.14 
   8  -3   1   20.84    4.32 
   8  -3   1   25.46    3.67 
  -8  -3  -1   20.17    2.71 
  -8  -3  -1   16.93    2.56 
   8   3   1   15.24    3.50 
  -8   3  -1   23.60    3.17 
  -8   3  -1   25.21    3.46 
   8   3   1   18.81    2.38 
   8   3   1   22.54    3.15 
   9  -3   1    5.24    3.50 
  -9  -3  -1   12.10    2.24 
  -9  -3  -1    9.53    2.61 
   9  -3   1   10.79    4.15 
   9  -3   1    8.42    3.08 
   9  -3   1   13.04    3.89 
  -9  -3  -1   11.04    2.78 
  -9   3  -1   13.12    3.32 
   9   3   1    9.08    2.69 
   9   3   1    5.92    3.75 
  -9   3  -1   13.24    4.04 
  10  -3   1    0.36    4.82 
 -10  -3  -1    0.92    2.06 
  10  -3   1   -1.60    3.89 
  10  -3   1   -1.20    3.10 
 -10   3  -1    2.54    3.29 
  10   3   1   -1.28    2.60 
 -10   3  -1    5.83    4.54 
 -10   3  -1    5.37    3.30 
  10  -4  -1   12.42    4.38 
  10  -4  -1   18.09    6.54 
  10  -4  -1   21.66    5.21 
 -10  -4   1   24.93    2.99 
 -10   4   1   24.78    4.32 
  10   4  -1   17.12    4.01 
 -10   4   1   19.62    6.49 
   9  -4  -1    7.68    4.84 
   9  -4  -1    8.18    3.46 
   9  -4  -1   10.86    3.91 
  -9  -4   1   11.74    2.19 
  -9   4   1    7.84    4.66 
  -9   4   1   17.37    3.62 
  -8  -4   1   14.94    1.98 
  -8  -4   1   12.11    2.13 
   8  -4  -1   13.69    3.25 
  -8  -4   1   16.99    3.20 
   8  -4  -1   11.83    4.04 
   8  -4  -1   14.85    3.65 
  -8  -4   1   12.63    2.47 
   8  -4  -1   15.46    3.54 
  -8   4   1    3.63    3.85 
   8   4  -1    9.55    2.67 
  -8   4   1    9.46    2.78 
   8   4  -1    9.65    2.02 
   8   4  -1   12.98    3.41 
  -7  -4   1   14.92    2.72 
   7  -4  -1    9.86    3.16 
  -7  -4   1   15.92    2.26 
   7  -4  -1   13.07    2.46 
   7  -4  -1   14.12    2.79 
   7  -4  -1   12.54    2.96 
   7  -4  -1   12.01    3.61 
  -7  -4   1   12.51    1.93 
   7   4  -1   15.95    2.43 
  -7   4   1   12.20    3.67 
  -7   4   1   15.80    2.72 
   7   4  -1   14.15    1.86 
  -7   4   1   13.98    2.69 
  -7   4   1   12.41    2.36 
   7   4  -1   15.84    3.07 
  -6  -4   1   71.83    4.58 
  -6  -4   1   66.33    5.02 
  -6  -4   1   70.54    4.21 
   6  -4  -1   73.17    5.84 
   6  -4  -1   75.27    5.83 
   6  -4  -1   64.02    6.61 
  -6  -4   1   70.39    4.41 
  -6   4   1   65.42    6.07 
  -6   4   1   64.71    4.72 
   6   4  -1   65.29    4.72 
  -6   4   1   66.08    5.27 
  -6   4   1   71.12    5.47 
   6   4  -1   68.03    5.37 
   6   4  -1   65.10    4.21 
  -6   4   1   66.43    6.14 
   5  -4  -1   58.45    5.23 
  -5  -4   1   61.71    4.37 
   5  -4  -1   61.77    5.93 
  -5  -4   1   61.62    4.07 
  -5  -4   1   56.73    4.21 
   5  -4  -1   56.55    4.66 
  -5  -4   1   57.29    4.64 
   5  -4  -1   63.39    5.28 
   5  -4  -1   58.90    4.81 
   5   4  -1   79.01    4.19 
   5   4  -1   79.24    5.24 
  -5   4   1   80.29    4.55 
  -5   4   1   78.45    5.93 
  -5   4   1   80.67    5.91 
  -5   4   1   80.17    5.27 
  -5   4   1   72.56    5.11 
   5   4  -1   80.63    4.60 
   4  -4  -1  152.58    8.65 
  -4  -4   1  154.45    8.05 
   4  -4  -1  151.18    8.78 
  -4  -4   1  156.52    7.86 
   4  -4  -1  157.52    8.27 
  -4  -4   1  159.24    8.26 
   4  -4  -1  157.69    8.47 
   4  -4  -1  154.03    9.46 
  -4  -4   1  159.70    8.00 
  -4   4   1  146.87    7.96 
   4   4  -1  139.51    8.06 
  -4   4   1  136.02    8.76 
   4   4  -1  139.97    7.76 
   4   4  -1  137.48    7.62 
  -4   4   1  133.74    8.86 
   4   4  -1  145.02    8.51 
  -4   4   1  143.93    8.48 
  -4   4   1  138.27    8.47 
   3  -4  -1   43.06    4.69 
   3  -4  -1   38.04    3.27 
  -3  -4   1   38.12    3.37 
   3  -4  -1   39.24    3.39 
   3  -4  -1   44.97    3.81 
  -3  -4   1   38.35    3.03 
  -3  -4   1   42.41    3.40 
   3  -4  -1   36.81    3.64 
  -3  -4   1   38.50    2.97 
   3   4  -1   48.13    3.85 
  -3   4   1   49.78    3.69 
  -3   4   1   44.43    3.57 
   3   4  -1   44.59    3.20 
  -3   4   1   48.44    4.24 
   3   4  -1   47.97    3.00 
  -3   4   1   45.10    3.99 
   3   4  -1   45.49    3.09 
  -3   4   1   49.96    3.28 
  -2  -4   1   14.94    1.81 
  -2  -4   1   11.02    1.85 
   2  -4  -1   10.71    1.61 
  -2  -4   1   14.34    2.09 
   2  -4  -1   12.25    1.92 
  -2  -4   1   13.44    1.75 
   2  -4  -1   11.54    2.45 
   2  -4  -1   10.60    1.71 
   2  -4  -1   15.72    2.10 
  -2   4   1    8.35    1.56 
   2   4  -1   12.88    1.64 
  -2   4   1    9.98    1.40 
   2   4  -1   13.19    1.81 
   2   4  -1   11.75    1.95 
  -2   4   1    9.85    1.90 
  -2   4   1    9.14    1.62 
   2   4  -1   15.07    1.97 
   2   4  -1   12.02    1.66 
  -1  -4   1   25.49    3.09 
   1  -4  -1   24.76    2.69 
   1  -4  -1   24.83    2.49 
   1  -4  -1   24.30    2.54 
   1  -4  -1   18.57    2.82 
  -1  -4   1   19.91    2.56 
  -1  -4   1   21.72    2.28 
   1  -4  -1   24.29    2.83 
  -1  -4   1   23.68    2.36 
  -1   4   1   32.05    3.30 
  -1   4   1   32.67    2.72 
  -1   4   1   30.79    2.42 
   1   4  -1   32.67    2.53 
   1   4  -1   31.09    3.18 
   1   4  -1   34.98    2.50 
  -1   4   1   31.85    2.70 
   1   4  -1   28.85    2.68 
  -1   4   1   31.42    3.04 
   1   4  -1   31.93    2.42 
   0  -4   1  100.48    5.86 
   0  -4  -1  110.38    6.25 
   0  -4   1  105.01    6.10 
   0  -4  -1  101.88    6.03 
   0  -4   1   99.14    6.43 
   0  -4  -1  101.09    6.57 
   0  -4  -1  101.18    5.89 
   0  -4   1  105.25    6.02 
   0   4  -1   99.17    6.04 
   0   4   1   99.42    5.81 
   0   4   1  102.57    6.02 
   0   4  -1   96.92    5.86 
   0   4  -1   99.72    6.33 
   0   4   1  101.52    6.14 
   0   4   1  101.52    6.35 
   0   4  -1  102.68    5.65 
   0   4  -1  105.96    6.00 
   0   4   1  106.29    5.96 
   1  -4   1   61.56    4.05 
  -1  -4  -1   51.92    3.67 
  -1  -4  -1   58.85    4.05 
  -1  -4  -1   52.86    4.22 
   1  -4   1   53.07    3.82 
   1  -4   1   55.55    3.56 
   1  -4   1   52.59    4.59 
   1  -4   1   51.10    3.65 
  -1  -4  -1   51.84    3.60 
  -1   4  -1   56.90    4.35 
   1   4   1   51.29    3.52 
   1   4   1   48.97    3.64 
  -1   4  -1   48.38    3.35 
   1   4   1   51.52    3.78 
  -1   4  -1   51.98    3.69 
   1   4   1   53.92    4.21 
  -1   4  -1   46.53    3.92 
  -1   4  -1   50.03    3.72 
   1   4   1   54.45    3.57 
  -2  -4  -1   67.48    4.60 
   2  -4   1   67.41    4.74 
   2  -4   1   65.75    4.43 
  -2  -4  -1   69.46    4.37 
  -2  -4  -1   65.55    4.31 
   2  -4   1   62.13    4.26 
  -2  -4  -1   63.10    4.67 
   2  -4   1   66.34    5.39 
   2  -4   1   65.98    4.71 
  -2   4  -1   72.66    5.01 
  -2   4  -1   75.64    4.99 
   2   4   1   71.19    5.04 
   2   4   1   70.69    4.44 
  -2   4  -1   77.82    4.70 
   2   4   1   70.65    4.40 
   2   4   1   71.79    4.40 
   2   4   1   71.66    4.27 
  -2   4  -1   70.20    4.58 
   3  -4   1   76.66    5.30 
  -3  -4  -1   79.77    4.69 
  -3  -4  -1   79.73    4.74 
   3  -4   1   77.58    6.09 
  -3  -4  -1   76.41    5.05 
  -3  -4  -1   77.91    5.06 
   3  -4   1   83.56    5.34 
   3  -4   1   78.24    4.76 
   3  -4   1   84.38    5.08 
   3   4   1   74.77    4.81 
   3   4   1   71.82    4.54 
  -3   4  -1   73.77    5.50 
  -3   4  -1   79.40    5.03 
   3   4   1   68.60    5.29 
   3   4   1   72.67    4.55 
  -3   4  -1   76.87    5.10 
  -3   4  -1   72.82    5.45 
  -3   4  -1   76.00    4.50 
  -4  -4  -1  127.05    7.54 
  -4  -4  -1  135.22    7.36 
   4  -4   1  134.86    8.57 
   4  -4   1  126.64    7.92 
  -4  -4  -1  136.03    7.18 
   4  -4   1  132.36    7.65 
   4  -4   1  122.81    7.26 
   4  -4   1  127.16    7.71 
  -4  -4  -1  126.01    7.25 
   4   4   1  128.97    7.09 
  -4   4  -1  136.96    7.72 
   4   4   1  126.57    7.38 
  -4   4  -1  134.86    7.12 
   4   4   1  131.30    7.95 
   4   4   1  132.69    7.01 
  -4   4  -1  125.91    8.08 
  -4   4  -1  136.83    8.28 
  -4   4  -1  130.13    7.81 
   5  -4   1   13.59    2.25 
   5  -4   1    8.84    2.28 
  -5  -4  -1   12.00    1.68 
   5  -4   1   12.05    2.52 
  -5  -4  -1   10.92    1.75 
  -5  -4  -1   13.79    2.35 
   5  -4   1   14.10    3.39 
  -5  -4  -1   11.37    1.98 
   5  -4   1   11.83    2.11 
  -5   4  -1   14.21    2.66 
  -5   4  -1   14.66    2.33 
   5   4   1   14.20    2.02 
  -5   4  -1   14.25    1.86 
   5   4   1   18.53    3.05 
  -5   4  -1   14.28    2.72 
  -5   4  -1   16.77    2.35 
   5   4   1   17.67    2.11 
  -6  -4  -1   59.48    4.53 
  -6  -4  -1   64.45    5.17 
  -6  -4  -1   56.09    4.40 
   6  -4   1   60.94    4.96 
   6  -4   1   66.85    5.68 
   6  -4   1   60.63    6.65 
  -6   4  -1   60.25    5.00 
  -6   4  -1   66.22    4.55 
   6   4   1   62.68    5.78 
  -6   4  -1   61.43    5.24 
   6   4   1   62.73    4.83 
   6   4   1   62.94    4.16 
  -7  -4  -1   47.04    3.74 
   7  -4   1   53.15    5.08 
   7  -4   1   49.02    4.86 
   7  -4   1   44.40    5.81 
  -7  -4  -1   48.42    4.23 
  -7  -4  -1   51.20    4.19 
   7  -4   1   49.24    5.75 
   7  -4   1   48.82    5.42 
   7   4   1   43.35    3.75 
  -7   4  -1   47.27    4.28 
   7   4   1   46.20    5.70 
  -7   4  -1   50.81    6.21 
   7   4   1   43.77    4.66 
  -7   4  -1   44.26    5.08 
  -8  -4  -1    6.03    2.30 
   8  -4   1    1.75    4.02 
  -8  -4  -1    7.15    2.47 
  -8  -4  -1    6.57    1.88 
   8  -4   1    5.83    2.74 
   8  -4   1    5.77    3.23 
   8   4   1    4.61    1.88 
  -8   4  -1    5.33    2.79 
  -8   4  -1    2.05    3.63 
   8   4   1    3.84    3.56 
   9  -4   1   21.00    4.21 
   9  -4   1   31.67    5.21 
  -9  -4  -1   27.06    3.12 
   9  -4   1   30.45    6.20 
  -9   4  -1   26.83    4.19 
  -9   4  -1   31.99    5.92 
   9  -5  -1   13.63    5.60 
  -9  -5   1   14.59    2.74 
   9  -5  -1   14.28    6.84 
   9  -5  -1   20.75    4.84 
  -9   5   1   19.84    6.47 
  -9   5   1   16.07    4.18 
   8  -5  -1   14.49    6.19 
   8  -5  -1   25.36    4.99 
  -8  -5   1   20.58    2.62 
   8  -5  -1   26.85    4.34 
  -8   5   1   25.80    5.33 
  -8   5   1   18.94    3.92 
   7  -5  -1   27.93    4.45 
  -7  -5   1   36.82    4.23 
  -7  -5   1   33.20    3.77 
   7  -5  -1   32.05    4.28 
  -7  -5   1   35.71    4.33 
   7  -5  -1   31.05    6.26 
  -7  -5   1   31.92    3.21 
  -7   5   1   31.68    5.48 
  -7   5   1   26.76    4.06 
   7   5  -1   28.95    4.46 
   7   5  -1   23.04    3.25 
   6  -5  -1   39.90    4.97 
  -6  -5   1   34.39    3.28 
  -6  -5   1   40.40    3.73 
   6  -5  -1   41.58    4.91 
   6  -5  -1   33.34    4.49 
  -6  -5   1   33.85    3.96 
   6  -5  -1   30.51    5.53 
   6  -5  -1   32.52    4.60 
  -6   5   1   39.44    4.81 
   6   5  -1   41.60    3.50 
  -6   5   1   37.72    5.10 
  -6   5   1   42.30    5.33 
   6   5  -1   41.10    4.24 
  -6   5   1   36.79    4.08 
   6   5  -1   46.93    5.56 
   5  -5  -1    3.56    2.01 
  -5  -5   1    5.21    1.57 
   5  -5  -1    7.00    2.79 
  -5  -5   1    4.81    2.34 
  -5  -5   1    5.02    1.40 
   5  -5  -1    4.25    3.15 
  -5  -5   1    4.27    1.76 
   5  -5  -1    4.53    2.80 
  -5   5   1    6.03    2.93 
   5   5  -1    1.57    1.34 
   5   5  -1    1.88    1.76 
  -5   5   1    4.82    2.23 
  -5   5   1    5.05    2.87 
  -5   5   1    3.31    1.64 
   5   5  -1    2.73    2.37 
   4  -5  -1   29.16    3.69 
  -4  -5   1   25.66    2.82 
   4  -5  -1   29.69    4.72 
  -4  -5   1   31.59    3.54 
  -4  -5   1   30.55    3.79 
  -4  -5   1   24.28    2.97 
   4  -5  -1   31.04    3.49 
   4  -5  -1   21.15    3.31 
   4  -5  -1   23.03    3.40 
  -4   5   1   29.75    3.61 
   4   5  -1   28.51    2.74 
   4   5  -1   24.47    3.34 
  -4   5   1   31.63    3.86 
  -4   5   1   22.37    3.67 
   4   5  -1   24.80    2.72 
  -4   5   1   28.17    4.19 
   4   5  -1   31.27    3.35 
  -4   5   1   24.72    3.07 
   4   5  -1   26.04    3.02 
   3  -5  -1   31.19    4.43 
  -3  -5   1   29.46    3.02 
  -3  -5   1   26.36    2.87 
  -3  -5   1   29.52    3.81 
   3  -5  -1   24.76    3.38 
   3  -5  -1   29.37    3.47 
  -3  -5   1   30.48    3.83 
   3  -5  -1   28.58    3.21 
   3  -5  -1   25.64    3.51 
  -3   5   1   29.78    3.92 
  -3   5   1   31.84    3.64 
   3   5  -1   34.12    2.91 
  -3   5   1   29.38    3.71 
   3   5  -1   33.86    3.35 
  -3   5   1   32.66    3.20 
   3   5  -1   33.23    3.27 
   3   5  -1   35.61    3.18 
   3   5  -1   34.62    4.11 
   2  -5  -1  123.34    6.97 
   2  -5  -1  116.20    7.30 
  -2  -5   1  121.11    7.17 
  -2  -5   1  112.60    6.76 
   2  -5  -1  121.12    8.12 
   2  -5  -1  125.76    7.25 
  -2  -5   1  121.65    6.82 
  -2  -5   1  122.12    7.51 
   2  -5  -1  124.04    7.47 
   2   5  -1  111.80    7.53 
   2   5  -1  110.73    6.67 
   2   5  -1  110.12    6.89 
  -2   5   1  110.80    7.14 
  -2   5   1  107.75    7.16 
   2   5  -1  111.29    6.87 
  -2   5   1  110.65    7.48 
   2   5  -1  118.85    6.79 
  -2   5   1  118.76    8.05 
  -2   5   1  113.51    6.71 
  -1  -5   1  116.50    7.16 
  -1  -5   1  116.78    7.38 
   1  -5  -1  126.68    8.39 
  -1  -5   1  110.78    7.07 
   1  -5  -1  115.55    7.37 
  -1  -5   1  117.72    7.87 
   1  -5  -1  114.81    7.38 
  -1   5   1  123.15    7.63 
  -1   5   1  117.97    6.99 
   1   5  -1  125.82    7.41 
  -1   5   1  134.12    7.42 
  -1   5   1  130.02    8.12 
   1   5  -1  128.05    7.77 
   1   5  -1  131.18    7.05 
   1   5  -1  129.76    7.33 
   1   5  -1  128.17    7.14 
   0  -5  -1   72.32    4.97 
   0  -5  -1   75.78    5.01 
   0  -5  -1   70.26    5.70 
   0  -5  -1   70.31    6.01 
   0  -5   1   71.45    5.85 
   0  -5   1   76.37    5.01 
   0  -5   1   72.92    5.11 
   0  -5   1   77.07    4.93 
   0   5  -1   73.05    4.67 
   0   5   1   61.80    5.03 
   0   5   1   70.68    4.72 
   0   5  -1   70.52    5.58 
   0   5  -1   67.33    5.12 
   0   5   1   71.42    4.90 
   0   5  -1   72.38    5.00 
   0   5  -1   68.66    4.81 
   1  -5   1   35.86    3.50 
  -1  -5  -1   37.05    3.45 
  -1  -5  -1   38.21    4.46 
   1  -5   1   36.45    3.62 
  -1  -5  -1   40.16    3.92 
  -1  -5  -1   28.79    3.32 
   1  -5   1   37.95    4.70 
   1   5   1   37.48    4.57 
  -1   5  -1   39.69    3.63 
   1   5   1   41.75    3.76 
   1   5   1   44.30    3.71 
  -1   5  -1   41.91    4.60 
  -1   5  -1   47.12    3.42 
  -1   5  -1   36.61    3.86 
   1   5   1   41.16    3.45 
   1   5   1   45.41    3.53 
   2  -5   1    9.26    2.08 
  -2  -5  -1   10.06    2.51 
  -2  -5  -1    7.30    1.72 
   2  -5   1    9.24    3.12 
  -2  -5  -1   10.05    1.79 
  -2  -5  -1    9.75    2.23 
   2  -5   1    8.66    1.79 
   2  -5   1    7.52    1.77 
  -2   5  -1    5.91    1.37 
   2   5   1    6.95    1.80 
  -2   5  -1    5.73    2.12 
  -2   5  -1    5.74    2.59 
   2   5   1    8.52    2.34 
  -2   5  -1    8.08    2.05 
   2   5   1    7.47    1.94 
   2   5   1    6.25    1.62 
   2   5   1    5.57    1.48 
   3  -5   1   25.04    4.32 
  -3  -5  -1   28.52    3.68 
   3  -5   1   25.61    3.32 
  -3  -5  -1   28.67    3.08 
  -3  -5  -1   25.16    3.15 
  -3  -5  -1   28.34    2.79 
   3  -5   1   26.32    3.60 
   3  -5   1   26.40    3.09 
  -3   5  -1   21.82    2.66 
   3   5   1   26.37    3.27 
   3   5   1   20.64    3.00 
  -3   5  -1   23.07    3.42 
   3   5   1   21.30    2.75 
  -3   5  -1   21.48    2.81 
  -3   5  -1   21.40    3.49 
   3   5   1   22.35    3.35 
   3   5   1   22.08    2.71 
  -3   5  -1   24.18    3.37 
  -4  -5  -1   23.71    2.78 
   4  -5   1   25.81    3.40 
   4  -5   1   22.58    3.27 
   4  -5   1   23.16    4.17 
  -4  -5  -1   28.38    3.17 
   4  -5   1   20.49    2.67 
   4  -5   1   26.07    3.64 
  -4  -5  -1   24.58    3.07 
  -4   5  -1   14.52    3.24 
   4   5   1   16.63    2.53 
  -4   5  -1   17.81    2.98 
   4   5   1   18.34    2.26 
   4   5   1   17.04    2.27 
   4   5   1   19.34    2.67 
  -4   5  -1   18.19    2.34 
  -4   5  -1   21.46    3.46 
   4   5   1   20.84    3.42 
   5  -5   1   20.88    3.52 
  -5  -5  -1   25.18    2.86 
   5  -5   1   24.40    3.68 
   5  -5   1   28.21    3.66 
  -5  -5  -1   20.92    2.66 
   5  -5   1   20.71    4.45 
  -5  -5  -1   23.62    2.89 
  -5   5  -1   20.95    3.22 
   5   5   1   24.08    2.77 
  -5   5  -1   17.25    3.86 
   5   5   1   18.26    3.66 
  -5   5  -1   19.14    3.91 
   5   5   1   17.79    2.38 
  -5   5  -1   18.58    2.54 
   5   5   1   17.86    2.81 
   6  -5   1   28.61    3.75 
  -6  -5  -1   34.26    4.26 
  -6  -5  -1   38.76    4.40 
   6  -5   1   34.53    5.79 
   6  -5   1   42.85    5.12 
  -6  -5  -1   31.70    3.96 
  -6  -5  -1   32.16    3.43 
   6  -5   1   39.68    4.76 
   6   5   1   38.21    4.98 
  -6   5  -1   38.56    5.21 
   6   5   1   35.68    3.55 
  -6   5  -1   38.83    5.04 
  -6   5  -1   37.51    4.10 
  -6   5  -1   34.93    4.98 
   7  -5   1   34.44    4.97 
  -7  -5  -1   48.99    5.03 
   7  -5   1   42.75    6.44 
  -7  -5  -1   44.77    3.90 
   7  -5   1   43.94    5.63 
  -7   5  -1   42.08    5.99 
   7   5   1   44.11    5.67 
   7   5   1   38.44    4.07 
   8  -5   1   12.84    5.96 
   8  -5   1   15.18    4.59 
  -8  -5  -1   18.34    2.68 
   8  -5   1   21.46    4.33 
  -8   5  -1   22.19    4.44 
  -8   5  -1   15.06    5.22 
   7  -6  -1   10.84    5.12 
   7  -6  -1   12.00    4.09 
   7  -6  -1   17.43    7.17 
  -7  -6   1   11.07    2.42 
  -7   6   1    9.60    4.10 
  -7   6   1    8.45    5.02 
   6  -6  -1   34.47    4.45 
   6  -6  -1   28.69    5.02 
   6  -6  -1   24.83    6.46 
  -6  -6   1   33.85    3.79 
  -6   6   1   30.61    4.70 
   6   6  -1   31.42    4.25 
  -6   6   1   35.92    5.76 
  -5  -6   1   33.12    3.64 
   5  -6  -1   31.69    4.07 
  -5  -6   1   35.01    4.13 
  -5  -6   1   34.43    4.66 
   5  -6  -1   36.25    4.88 
   5  -6  -1   29.10    6.27 
   5   6  -1   31.60    4.64 
  -5   6   1   26.66    4.07 
   5   6  -1   29.12    3.67 
  -5   6   1   32.84    5.10 
   5   6  -1   35.24    3.32 
  -4  -6   1   41.10    5.08 
   4  -6  -1   42.96    6.37 
   4  -6  -1   29.64    4.08 
  -4  -6   1   45.06    5.46 
  -4  -6   1   40.29    3.88 
   4  -6  -1   41.40    4.86 
   4  -6  -1   35.26    4.69 
  -4  -6   1   32.24    4.16 
  -4   6   1   42.12    5.35 
  -4   6   1   30.64    5.12 
   4   6  -1   38.87    3.79 
   4   6  -1   38.43    5.01 
  -4   6   1   38.45    5.25 
   4   6  -1   37.30    4.73 
   4   6  -1   37.72    3.76 
  -4   6   1   39.76    4.52 
   3  -6  -1   19.54    4.48 
  -3  -6   1   14.32    3.28 
  -3  -6   1   16.33    2.71 
   3  -6  -1   16.36    3.30 
   3  -6  -1   17.12    2.73 
  -3  -6   1   15.97    3.42 
   3  -6  -1   10.80    2.72 
  -3  -6   1   12.63    2.39 
   3   6  -1   14.42    2.48 
   3   6  -1   15.85    2.77 
   3   6  -1   15.13    3.39 
  -3   6   1   16.20    2.84 
  -3   6   1   17.49    4.26 
   3   6  -1   15.74    2.78 
  -3   6   1   14.39    2.95 
   3   6  -1   13.57    2.32 
  -3   6   1   13.76    3.60 
  -2  -6   1    1.95    1.94 
  -2  -6   1    1.88    1.69 
  -2  -6   1    4.58    2.67 
   2  -6  -1    0.58    2.07 
   2  -6  -1    0.28    3.55 
   2  -6  -1    1.10    2.23 
   2  -6  -1   -1.27    2.56 
  -2  -6   1    1.37    2.87 
  -2   6   1    1.06    2.37 
  -2   6   1    1.80    1.89 
  -2   6   1    4.29    3.40 
  -2   6   1    0.33    1.87 
   2   6  -1    0.93    1.64 
  -2   6   1   -1.20    2.17 
   2   6  -1   -1.76    1.94 
   2   6  -1    0.16    2.63 
   2   6  -1    3.76    1.97 
   2   6  -1    0.23    1.94 
  -1  -6   1   20.03    3.27 
  -1  -6   1   17.45    3.71 
  -1  -6   1   14.76    2.48 
   1  -6  -1   20.20    4.47 
  -1  -6   1   19.37    2.73 
   1  -6  -1   21.77    3.05 
   1  -6  -1   15.55    2.94 
  -1   6   1   16.45    3.99 
   1   6  -1   12.96    2.38 
  -1   6   1    9.73    2.83 
  -1   6   1   11.63    2.47 
  -1   6   1   14.56    2.81 
   1   6  -1   10.52    3.22 
   1   6  -1    9.96    2.60 
   1   6  -1   13.14    2.42 
   1   6  -1   12.31    2.38 
   0  -6   1   46.58    4.66 
   0  -6  -1   47.43    4.92 
   0  -6  -1   43.76    4.59 
   0  -6   1   49.64    6.35 
   0  -6   1   49.62    4.90 
   0  -6  -1   44.33    6.09 
   0  -6   1   46.78    5.35 
   0   6   1   64.03    4.95 
   0   6   1   60.14    6.43 
   0   6  -1   53.56    5.25 
   0   6  -1   64.43    4.88 
   0   6  -1   64.34    6.20 
   0   6  -1   57.40    4.58 
   0   6   1   53.68    4.69 
   0   6   1   57.73    5.39 
   1  -6   1   51.03    5.89 
  -1  -6  -1   44.94    4.76 
   1  -6   1   46.71    4.66 
   1  -6   1   46.49    4.57 
  -1  -6  -1   40.90    5.51 
  -1  -6  -1   50.28    5.94 
  -1  -6  -1   43.35    4.27 
  -1   6  -1   49.21    4.71 
  -1   6  -1   47.80    4.26 
  -1   6  -1   44.53    5.01 
   1   6   1   49.37    4.40 
   1   6   1   50.36    4.66 
   1   6   1   32.90    4.37 
   1   6   1   57.10    5.09 
   1   6   1   51.80    5.98 
  -1   6  -1   41.73    5.04 
  -2  -6  -1   68.44    6.25 
  -2  -6  -1   59.54    5.19 
   2  -6   1   66.64    7.08 
  -2  -6  -1   62.71    6.10 
   2  -6   1   58.21    5.27 
  -2  -6  -1   57.70    4.91 
   2  -6   1   65.69    5.50 
   2   6   1   69.90    5.47 
  -2   6  -1   57.58    5.30 
   2   6   1   59.64    4.79 
   2   6   1   61.43    4.98 
   2   6   1   59.67    6.70 
  -2   6  -1   58.47    6.77 
   2   6   1   56.14    5.25 
  -2   6  -1   58.26    5.74 
  -2   6  -1   53.46    4.73 
   3  -6   1   75.23    6.29 
   3  -6   1   72.40    5.61 
  -3  -6  -1   71.16    5.62 
   3  -6   1   78.63    6.11 
   3  -6   1   69.58    8.19 
  -3  -6  -1   67.38    6.43 
  -3  -6  -1   62.85    7.29 
  -3  -6  -1   72.35    5.33 
  -3   6  -1   68.03    5.15 
   3   6   1   77.21    5.98 
  -3   6  -1   72.47    6.48 
   3   6   1   66.94    5.27 
  -3   6  -1   71.51    7.58 
   3   6   1   69.14    5.32 
   4  -6   1    9.20    2.67 
  -4  -6  -1   11.92    2.72 
  -4  -6  -1   10.29    2.29 
   4  -6   1    9.92    4.89 
   4  -6   1   12.68    3.34 
  -4  -6  -1    7.78    2.92 
   4   6   1   11.75    3.74 
  -4   6  -1   14.11    3.35 
  -4   6  -1    9.13    2.59 
   4   6   1    9.00    2.16 
  -4   6  -1   15.47    4.56 
  -4   6  -1   11.28    3.73 
   4   6   1   11.82    2.24 
   5  -6   1   37.07    4.19 
  -5  -6  -1   30.72    3.83 
   5  -6   1   31.75    4.94 
  -5  -6  -1   33.00    3.94 
   5  -6   1   42.81    6.93 
  -5  -6  -1   32.53    3.89 
  -5   6  -1   25.18    4.32 
   5   6   1   28.25    5.11 
   5   6   1   28.25    3.97 
  -5   6  -1   30.77    5.34 
   5   6   1   24.00    2.90 
   6  -6   1    7.37    3.09 
   6  -6   1    8.47    4.09 
   6  -6   1   12.47    5.73 
  -6  -6  -1    2.97    2.03 
  -6  -6  -1    4.40    2.97 
   6   6   1    7.39    2.41 
  -6   6  -1    8.67    3.52 
  -6   6  -1    0.75    4.16 
  -7  -6  -1   17.82    2.79 
   7  -6   1   17.26    7.12 
   7  -6   1   25.80    6.06 
   7  -6   1   21.89    4.36 
  -7   6  -1   14.24    4.56 
  -7   6  -1   17.26    5.87 
   5  -7  -1   18.19    7.11 
   5  -7  -1   18.28    4.13 
  -5  -7   1   21.61    3.28 
   5  -7  -1   17.87    4.94 
  -5   7   1   17.02    5.64 
   5   7  -1   15.59    2.87 
  -5   7   1   15.30    4.59 
   4  -7  -1    7.52    6.09 
   4  -7  -1   13.79    3.87 
   4  -7  -1    8.99    3.85 
  -4  -7   1   13.04    3.01 
   4   7  -1   16.65    3.07 
  -4   7   1   13.92    4.71 
  -4   7   1   12.19    3.99 
  -3  -7   1   11.27    4.33 
  -3  -7   1   10.90    2.69 
   3  -7  -1   11.32    3.22 
   3  -7  -1   11.63    5.45 
   3  -7  -1   13.06    4.32 
  -3   7   1   22.11    4.84 
   3   7  -1   18.73    3.17 
   3   7  -1   10.25    3.14 
  -3   7   1   16.63    4.14 
   2  -7  -1   52.14    5.76 
  -2  -7   1   45.01    5.93 
   2  -7  -1   40.39    7.37 
  -2  -7   1   44.06    5.20 
   2   7  -1   41.93    6.05 
   2   7  -1   51.65    5.65 
   2   7  -1   37.88    5.14 
  -2   7   1   46.96    6.47 
  -2   7   1   48.40    6.10 
  -2   7   1   41.91    6.76 
  -1  -7   1   35.12    4.69 
  -1  -7   1   38.02    4.42 
   1  -7  -1   42.64    6.59 
  -1  -7   1   36.63    5.82 
   1  -7  -1   39.08    4.93 
   1  -7  -1   31.62    4.21 
   1   7  -1   28.12    4.30 
  -1   7   1   28.44    4.26 
  -1   7   1   42.47    6.73 
  -1   7   1   28.42    4.71 
   1   7  -1   36.67    5.09 
   1   7  -1   40.29    6.00 
   0  -7  -1   14.41    3.03 
   0  -7   1   18.43    3.58 
   0  -7  -1   13.77    3.76 
   0  -7   1   15.89    5.24 
   0  -7   1   14.85    3.16 
   0   7   1   25.16    4.10 
   0   7  -1   21.67    5.44 
   0   7   1   19.85    5.58 
   0   7  -1   21.86    3.72 
   0   7   1   22.80    3.67 
   0   7  -1   25.31    4.33 
   1  -7   1   32.49    6.32 
  -1  -7  -1   25.92    4.29 
   1  -7   1   36.51    4.97 
  -1  -7  -1   29.08    3.81 
   1  -7   1   34.10    4.65 
  -1  -7  -1   26.41    5.38 
   1   7   1   34.55    4.51 
   1   7   1   30.13    4.04 
  -1   7  -1   33.31    4.88 
   1   7   1   30.66    6.03 
  -1   7  -1   33.57    6.02 
   2  -7   1   12.52    5.48 
  -2  -7  -1   12.04    2.77 
   2  -7   1    8.79    3.27 
  -2  -7  -1   10.20    4.43 
  -2   7  -1   11.59    3.73 
   2   7   1    9.52    2.81 
   2   7   1    1.38    4.98 
  -2   7  -1    7.65    5.27 
  -2   7  -1   12.60    3.54 
   2   7   1    9.09    3.07 
   3  -7   1    6.59    3.54 
   3  -7   1    3.52    3.45 
   3  -7   1    5.22    5.34 
  -3  -7  -1    7.23    4.11 
  -3  -7  -1    7.98    2.74 
   3   7   1    7.97    2.80 
   3   7   1    7.15    2.90 
  -3   7  -1    5.67    3.89 
  -3   7  -1    9.08    3.55 
   4  -7   1   17.97    3.91 
   4  -7   1   13.44    6.55 
  -4  -7  -1   19.51    4.61 
  -4  -7  -1   11.88    3.03 
   4  -7   1   19.72    4.36 
   4   7   1   13.16    3.10 
   4   7   1   14.25    3.17 
  -4   7  -1   12.90    4.65 
  -4   7  -1   18.84    4.43 
   5  -7   1    3.03    4.34 
   5  -7   1    3.86    3.63 
   5  -7   1   -1.73    6.84 
  -5  -7  -1    2.61    2.49 
  -5   7  -1   -2.42    4.98 
  -5   7  -1    7.70    4.68 
   5   7   1    3.84    2.43 
 -11   0   2    2.45    3.66 
  11   0  -2    0.12    3.74 
  11   0  -2    0.99    3.16 
  11   0  -2   -0.38    2.55 
 -11   0   2    2.45    2.38 
  10   0  -2    2.49    2.14 
  10   0  -2    0.03    2.25 
 -10   0   2    2.11    1.84 
  10   0  -2    2.28    2.95 
  10   0  -2    3.14    2.31 
 -10   0   2    0.58    2.74 
 -10   0   2    2.08    1.71 
   9   0  -2   28.88    3.19 
   9   0  -2   24.58    3.40 
  -9   0   2   34.23    2.97 
   9   0  -2   25.88    3.49 
  -9   0   2   32.21    4.16 
   9   0  -2   26.85    3.66 
  -9   0   2   29.51    3.31 
   9   0  -2   27.81    3.63 
   8   0  -2   42.12    3.20 
  -8   0   2   36.86    3.78 
  -8   0   2   39.33    3.30 
  -8   0   2   42.81    3.17 
   8   0  -2   42.59    3.56 
   8   0  -2   40.18    4.11 
   8   0  -2   39.43    3.46 
  -7   0   2   68.11    4.01 
   7   0  -2   64.18    4.29 
  -7   0   2   65.22    4.54 
   7   0  -2   63.91    4.30 
  -7   0   2   65.55    4.14 
   7   0  -2   63.39    4.65 
   7   0  -2   64.51    4.01 
   7   0  -2   68.63    4.30 
   6   0  -2   33.17    2.55 
   6   0  -2   30.33    2.59 
   6   0  -2   34.90    2.66 
  -6   0   2   35.26    2.56 
  -6   0   2   35.82    2.40 
   6   0  -2   35.33    2.40 
  -6   0   2   33.23    2.77 
   6   0  -2   32.76    2.89 
   5   0  -2  108.68    5.97 
   5   0  -2  108.96    5.84 
   5   0  -2  107.65    5.72 
  -5   0   2  108.46    5.78 
   5   0  -2  113.36    5.79 
  -5   0   2  106.94    5.85 
  -5   0   2  109.11    5.73 
   5   0  -2  104.69    5.80 
   4   0  -2  455.88   22.32 
   4   0  -2  479.72   22.72 
  -4   0   2  462.97   22.24 
  -4   0   2  477.18   22.75 
   4   0  -2  470.32   22.33 
  -4   0   2  474.04   22.71 
   4   0  -2  459.44   22.16 
   3   0  -2  205.19    9.78 
   3   0  -2  195.45    9.69 
   3   0  -2  191.63    9.66 
   3   0  -2  198.89    9.80 
  -3   0   2  202.33    9.64 
   3   0  -2  199.16    9.58 
  -3   0   2  196.67    9.71 
  -3   0   2  202.24    9.79 
  -2   0   2   96.03    4.71 
   2   0  -2   93.61    4.74 
  -2   0   2   93.12    4.74 
  -2   0   2   98.65    4.76 
   2   0  -2   94.61    4.77 
   2   0  -2   97.56    4.68 
   2   0  -2   95.40    4.75 
   2   0  -2   98.45    4.76 
  -1   0   2   -0.01    0.16 
   1   0  -2    0.02    0.10 
   1   0  -2   -0.09    0.09 
   1   0  -2    0.22    0.12 
   1   0  -2    0.03    0.14 
  -1   0   2    0.15    0.13 
  -1   0   2    0.10    0.10 
   1   0  -2    0.29    0.15 
   0   0  -2   73.85    3.63 
  -1   0  -2    1.37    0.32 
   1   0   2    1.69    0.30 
   1   0   2    1.19    0.27 
   1   0   2    1.95    0.36 
  -1   0  -2    1.32    0.30 
  -1   0  -2    1.75    0.32 
  -2   0  -2  162.44    7.99 
  -2   0  -2  159.18    7.98 
   2   0   2  160.33    7.86 
  -2   0  -2  159.97    7.87 
   2   0   2  161.40    7.99 
   2   0   2  159.74    7.99 
  -3   0  -2  245.55   12.15 
  -3   0  -2  245.96   12.14 
   3   0   2  251.81   12.16 
   3   0   2  248.09   11.95 
   3   0   2  241.19   11.89 
  -3   0  -2  238.89   11.93 
   4   0   2  153.05    8.09 
  -4   0  -2  161.32    8.09 
   4   0   2  155.95    7.95 
  -4   0  -2  152.18    8.09 
  -4   0  -2  163.19    8.11 
   4   0   2  157.27    8.05 
   5   0   2   66.57    4.07 
   5   0   2   64.32    4.00 
  -5   0  -2   68.23    3.94 
   5   0   2   62.39    3.93 
  -5   0  -2   66.65    3.95 
   5   0   2   65.78    3.92 
  -5   0  -2   64.32    4.06 
  -6   0  -2   29.85    2.48 
  -6   0  -2   27.00    2.47 
  -6   0  -2   30.80    2.90 
   6   0   2   28.26    2.53 
   6   0   2   28.94    2.51 
   6   0   2   28.47    2.57 
   6   0   2   31.28    2.68 
   7   0   2   19.82    2.39 
  -7   0  -2   21.99    3.01 
   7   0   2   21.28    2.74 
  -7   0  -2   23.85    2.34 
   7   0   2   21.62    2.93 
  -7   0  -2   20.50    2.38 
   7   0   2   19.02    2.37 
   7   0   2   19.24    2.49 
   8   0   2   39.46    3.82 
   8   0   2   30.59    3.94 
  -8   0  -2   43.08    4.19 
   8   0   2   33.54    3.83 
  -8   0  -2   37.36    3.31 
   8   0   2   31.58    3.47 
  -8   0  -2   32.63    3.37 
   9   0   2   19.30    3.43 
   9   0   2   26.37    3.17 
  -9   0  -2   18.91    2.76 
  -9   0  -2   23.10    3.49 
   9   0   2   25.25    3.35 
   9   0   2   26.43    3.33 
  10   0   2   18.43    3.44 
  10   0   2   16.36    3.07 
 -10   0  -2   18.36    3.14 
  10   0   2   12.77    3.83 
  10   0   2   19.88    3.64 
 -10   0  -2   17.74    3.90 
 -10   0  -2   17.78    2.80 
  11   0   2   12.12    3.15 
 -11   0  -2   10.47    3.14 
  11   0   2    9.79    3.86 
  11   0   2    7.23    4.67 
  11  -1  -2   10.53    3.93 
  11  -1  -2    7.51    4.40 
 -11  -1   2    7.73    2.61 
  11  -1  -2    9.00    3.15 
 -11   1   2    7.24    3.00 
 -11   1   2    9.23    4.31 
  11   1  -2    8.46    2.69 
  11   1  -2    8.44    3.75 
  10  -1  -2    2.06    3.14 
 -10  -1   2   -1.14    1.65 
  10  -1  -2    1.11    2.59 
  10  -1  -2   -1.40    2.49 
  10  -1  -2    0.64    2.28 
 -10  -1   2   -2.61    2.43 
 -10  -1   2   -0.24    1.65 
  10   1  -2   -2.13    2.59 
  10   1  -2    1.95    2.18 
 -10   1   2   -0.16    2.99 
  10   1  -2   -1.76    2.03 
  10   1  -2   -0.24    2.26 
 -10   1   2    1.87    1.93 
 -10   1   2    3.91    1.82 
   9  -1  -2   14.01    3.31 
  -9  -1   2   14.01    2.04 
  -9  -1   2   15.04    2.00 
   9  -1  -2   14.10    2.48 
  -9  -1   2   14.16    2.61 
   9  -1  -2   13.28    2.12 
   9  -1  -2   14.81    2.75 
  -9   1   2   15.55    3.20 
   9   1  -2   15.09    2.31 
   9   1  -2   16.36    2.35 
   9   1  -2   14.49    2.27 
  -9   1   2   16.35    2.14 
   9   1  -2   14.00    2.69 
  -9   1   2   13.21    2.27 
   9   1  -2   11.52    2.44 
  -8  -1   2    4.30    1.33 
  -8  -1   2    4.14    1.59 
   8  -1  -2    5.64    1.94 
   8  -1  -2    4.64    1.74 
  -8  -1   2    4.79    1.28 
   8  -1  -2    4.63    2.33 
   8  -1  -2    3.95    1.33 
  -8   1   2    6.94    1.71 
  -8   1   2    8.54    1.58 
   8   1  -2    9.30    1.88 
  -8   1   2    7.56    2.23 
   8   1  -2    5.98    1.42 
   8   1  -2    8.10    2.01 
   8   1  -2    7.02    1.55 
  -7  -1   2   68.85    4.41 
   7  -1  -2   69.93    5.27 
  -7  -1   2   68.72    4.09 
  -7  -1   2   72.20    4.14 
   7  -1  -2   75.02    4.63 
   7  -1  -2   72.62    4.74 
   7  -1  -2   71.04    4.49 
   7  -1  -2   70.72    4.31 
   7   1  -2   62.25    4.19 
  -7   1   2   64.79    4.25 
   7   1  -2   59.52    4.37 
  -7   1   2   69.09    4.47 
  -7   1   2   57.31    4.89 
   7   1  -2   65.49    4.32 
   7   1  -2   65.36    4.14 
   7   1  -2   66.57    4.36 
   6  -1  -2  440.27   20.74 
   6  -1  -2  444.97   20.81 
   6  -1  -2  426.07   21.31 
   6  -1  -2  448.20   21.13 
  -6  -1   2  427.53   20.86 
  -6  -1   2  431.44   20.50 
  -6  -1   2  384.89   20.81 
   6  -1  -2  429.26   21.20 
   6   1  -2  416.25   20.99 
  -6   1   2  410.79   21.15 
   6   1  -2  402.72   20.49 
   6   1  -2  421.15   20.67 
  -6   1   2  438.13   20.77 
   6   1  -2  428.12   20.91 
  -6   1   2  444.18   21.03 
   5  -1  -2   88.93    5.22 
   5  -1  -2   92.10    5.08 
  -5  -1   2   90.36    4.79 
  -5  -1   2   84.85    4.76 
   5  -1  -2   89.42    5.49 
   5  -1  -2   91.95    5.02 
   5  -1  -2   92.59    5.13 
   5   1  -2   88.63    4.85 
  -5   1   2   95.88    5.38 
  -5   1   2   93.33    4.99 
  -5   1   2   89.43    5.03 
   5   1  -2   83.78    4.99 
  -5   1   2   92.31    5.13 
   5   1  -2   91.26    4.86 
   4  -1  -2   10.54    1.59 
   4  -1  -2   13.60    1.54 
  -4  -1   2   13.81    1.12 
   4  -1  -2   13.47    1.46 
  -4  -1   2   13.17    1.07 
   4  -1  -2   14.24    1.38 
   4  -1  -2   13.74    1.53 
  -4  -1   2   14.52    1.21 
  -4   1   2   16.10    1.75 
  -4   1   2   16.48    1.75 
   4   1  -2   16.06    1.25 
   4   1  -2   17.52    1.20 
   4   1  -2   16.43    1.14 
  -4   1   2   14.94    1.41 
  -4   1   2   16.12    1.42 
  -4   1   2   14.96    1.48 
  -3  -1   2  348.87   15.81 
   3  -1  -2  339.92   16.53 
   3  -1  -2  344.66   16.23 
   3  -1  -2  341.66   16.14 
   3  -1  -2  349.14   16.43 
   3  -1  -2  347.60   16.63 
  -3  -1   2  343.80   16.25 
  -3   1   2  332.58   16.56 
  -3   1   2  325.29   16.53 
   3   1  -2  347.88   16.29 
  -3   1   2  327.49   16.08 
   3   1  -2  329.05   16.24 
  -3   1   2  319.71   16.28 
  -3   1   2  320.02   16.26 
   3   1  -2  340.95   15.88 
  -2  -1   2  105.92    4.88 
   2  -1  -2   99.70    5.36 
   2  -1  -2  112.48    5.29 
  -2  -1   2  110.58    4.97 
   2  -1  -2  107.80    5.13 
   2  -1  -2  111.61    5.28 
   2  -1  -2  103.63    5.30 
   2   1  -2  103.29    4.99 
   2   1  -2   96.39    4.95 
  -2   1   2   98.18    5.25 
  -2   1   2  100.85    5.33 
   2   1  -2   98.36    4.92 
  -2   1   2   95.31    5.06 
  -2   1   2   92.72    5.24 
  -2   1   2   90.89    5.22 
   1  -1  -2   84.90    4.32 
  -1  -1   2   84.22    4.16 
   1  -1  -2   83.30    4.42 
  -1  -1   2   88.19    4.25 
   1  -1  -2   89.54    4.57 
   1  -1  -2   84.16    4.44 
   1   1  -2   87.68    4.25 
  -1   1   2   85.62    4.45 
   1   1  -2   84.34    4.16 
  -1   1   2   88.97    4.47 
  -1   1   2   83.34    4.51 
   1   1  -2   88.35    4.20 
   1   1  -2   86.05    4.23 
  -1   1   2   89.20    4.45 
   0  -1  -2  182.95    8.63 
   0  -1  -2  171.36    8.38 
   0  -1   2  181.91    8.55 
   0  -1  -2  173.67    8.58 
   0  -1   2  183.62    8.43 
   0  -1  -2  170.22    8.52 
   0  -1   2  179.98    8.35 
   0  -1   2  188.30    8.53 
   0  -1  -2  185.06    8.48 
   0  -1   2  181.82    8.24 
   0   1  -2  162.81    8.50 
   0   1   2  163.15    8.42 
   0   1  -2  172.17    8.39 
   0   1   2  166.05    8.54 
   0   1  -2  173.17    8.54 
   0   1   2  172.63    8.39 
   0   1   2  170.79    8.57 
   0   1   2  174.56    8.63 
   0   1  -2  169.58    8.22 
   0   1  -2  164.78    8.35 
   1  -1   2  905.56   43.24 
   1  -1   2  856.02   43.32 
   1  -1   2  899.53   44.41 
  -1  -1  -2  917.34   44.41 
   1  -1   2  890.33   44.46 
  -1  -1  -2  903.32   44.39 
  -1  -1  -2  927.05   43.25 
   1  -1   2  869.03   43.15 
  -1  -1  -2  886.51   43.19 
  -1   1  -2  954.05   43.29 
   1   1   2  962.49   43.32 
  -1   1  -2  945.03   43.36 
   1   1   2  917.69   44.43 
  -1   1  -2  983.68   43.33 
  -1   1  -2  937.96   44.45 
  -1   1  -2  970.63   44.46 
   1   1   2  964.31   43.17 
   1   1   2 1000.00   44.40 
  -2  -1  -2  857.73   37.60 
   2  -1   2  870.20   38.74 
   2  -1   2  830.20   38.80 
   2  -1   2  842.94   37.62 
   2  -1   2  852.14   37.91 
  -2  -1  -2  818.97   37.61 
  -2  -1  -2  795.54   38.60 
   2  -1   2  858.38   37.75 
  -2  -1  -2  854.83   38.64 
  -2   1  -2  739.85   37.73 
  -2   1  -2  755.49   38.71 
  -2   1  -2  749.56   38.70 
   2   1   2  745.58   38.57 
  -2   1  -2  752.77   37.57 
   2   1   2  780.96   37.67 
   2   1   2  767.27   38.64 
   3  -1   2  276.55   13.09 
   3  -1   2  265.50   13.28 
  -3  -1  -2  280.24   12.84 
   3  -1   2  268.36   13.39 
   3  -1   2  261.13   12.88 
  -3  -1  -2  270.86   13.16 
  -3  -1  -2  273.40   13.18 
   3  -1   2  267.57   13.27 
  -3  -1  -2  258.74   12.88 
   3   1   2  266.20   13.22 
   3   1   2  276.22   13.01 
   3   1   2  255.95   13.11 
  -3   1  -2  259.52   12.85 
  -3   1  -2  260.94   13.31 
  -3   1  -2  265.80   13.16 
   4  -1   2    2.12    1.06 
   4  -1   2    2.69    0.92 
  -4  -1  -2    2.75    0.86 
   4  -1   2    2.40    0.70 
   4  -1   2    1.80    0.86 
   4  -1   2    3.34    0.84 
  -4  -1  -2    2.06    0.62 
  -4  -1  -2    1.95    0.64 
   4   1   2    1.45    0.77 
   4   1   2    2.85    0.74 
  -4   1  -2    2.20    0.84 
   4   1   2    1.58    0.60 
  -4   1  -2    1.30    0.88 
  -4   1  -2    2.06    0.69 
   5  -1   2   14.48    1.99 
   5  -1   2   14.52    1.75 
   5  -1   2   13.16    1.98 
   5  -1   2   13.47    1.67 
  -5  -1  -2   17.39    1.80 
   5  -1   2   18.16    1.97 
  -5  -1  -2   15.44    1.56 
  -5  -1  -2   13.66    1.57 
  -5   1  -2   12.65    1.94 
  -5   1  -2   12.20    1.64 
  -5   1  -2   11.21    1.53 
   5   1   2   11.04    1.68 
   5   1   2   13.60    1.61 
   6  -1   2   48.92    4.13 
   6  -1   2   54.36    3.59 
  -6  -1  -2   49.94    3.34 
   6  -1   2   50.23    3.48 
  -6  -1  -2   47.55    3.38 
  -6  -1  -2   53.08    3.57 
   6  -1   2   55.65    3.91 
   6  -1   2   50.86    3.66 
   6   1   2   48.21    3.39 
   6   1   2   44.59    3.53 
   6   1   2   47.78    3.55 
  -6   1  -2   47.62    3.88 
  -6   1  -2   50.71    3.49 
  -6   1  -2   47.36    3.56 
   7  -1   2   27.76    3.07 
   7  -1   2   28.04    3.67 
   7  -1   2   32.85    3.33 
   7  -1   2   31.74    3.01 
  -7  -1  -2   31.38    2.69 
  -7  -1  -2   30.53    2.94 
  -7  -1  -2   25.59    2.65 
   7   1   2   25.80    2.81 
  -7   1  -2   25.52    3.36 
  -7   1  -2   26.53    2.71 
  -7   1  -2   28.08    2.94 
   7   1   2   24.09    3.09 
   7   1   2   28.15    2.79 
  -8  -1  -2    1.55    1.40 
   8  -1   2    0.56    2.18 
  -8  -1  -2    3.76    1.87 
  -8  -1  -2    5.47    1.61 
   8  -1   2    2.26    1.92 
   8  -1   2    4.44    1.94 
   8  -1   2    2.43    1.56 
   8   1   2    4.06    2.05 
   8   1   2    3.80    1.70 
   8   1   2    3.03    1.50 
  -8   1  -2    4.14    1.47 
   8   1   2    4.02    1.73 
  -8   1  -2    4.97    1.71 
  -8   1  -2    3.06    2.18 
   9  -1   2    8.89    2.67 
  -9  -1  -2    9.93    2.66 
   9  -1   2    8.18    2.82 
  -9  -1  -2    9.16    2.04 
  -9  -1  -2    5.91    1.88 
   9  -1   2    9.36    3.23 
   9  -1   2   12.94    2.55 
   9   1   2    9.35    2.13 
   9   1   2    9.45    2.84 
  -9   1  -2    8.78    3.16 
  -9   1  -2   10.02    2.40 
  -9   1  -2    8.12    2.14 
   9   1   2    6.33    2.59 
   9   1   2    8.16    2.31 
 -10  -1  -2   40.32    4.84 
  10  -1   2   36.29    4.69 
 -10  -1  -2   33.31    4.48 
  10  -1   2   47.83    5.15 
 -10  -1  -2   51.57    5.94 
  10  -1   2   38.15    5.47 
  10  -1   2   42.04    4.89 
 -10   1  -2   46.48    5.10 
  10   1   2   39.90    4.85 
  10   1   2   42.73    5.83 
  10   1   2   44.20    4.70 
 -10   1  -2   35.32    4.14 
  10   1   2   45.32    5.44 
  11  -1   2   72.33    8.98 
  11  -1   2   63.66    6.53 
 -11  -1  -2   60.17    8.06 
  11  -1   2   58.17    7.67 
 -11  -1  -2   53.14    5.78 
  11   1   2   44.41    5.97 
 -11   1  -2   40.71    6.29 
 -11   1  -2   40.20    4.97 
  11   1   2   42.79    5.10 
  11  -2  -2    4.78    4.75 
 -11  -2   2    1.49    2.29 
  11  -2  -2    7.09    3.38 
 -11   2   2    5.53    4.94 
  11   2  -2    1.72    2.98 
 -11   2   2    6.78    3.09 
  11   2  -2    7.31    3.66 
 -10  -2   2   24.19    3.49 
  10  -2  -2   22.18    3.61 
  10  -2  -2   21.39    4.62 
  10  -2  -2   21.61    4.04 
  10  -2  -2   25.01    3.92 
 -10  -2   2   19.54    2.58 
  10   2  -2   18.28    3.43 
 -10   2   2   20.69    3.27 
  10   2  -2   22.17    4.00 
 -10   2   2   22.99    3.58 
  10   2  -2   21.62    3.29 
 -10   2   2   27.52    4.73 
  10   2  -2   19.25    2.94 
   9  -2  -2    1.32    2.46 
  -9  -2   2    0.71    1.91 
   9  -2  -2   -1.08    3.00 
  -9  -2   2   -0.06    1.31 
   9  -2  -2    0.54    1.98 
  -9  -2   2   -0.11    1.38 
   9  -2  -2   -0.98    2.15 
  -9   2   2    3.07    1.93 
  -9   2   2    3.75    1.83 
   9   2  -2    1.67    1.73 
   9   2  -2    2.86    2.05 
  -9   2   2    4.96    2.91 
   9   2  -2    2.23    2.22 
   9   2  -2    4.82    2.13 
   9   2  -2    1.61    1.83 
   8  -2  -2   54.90    4.68 
   8  -2  -2   60.88    5.17 
  -8  -2   2   60.38    4.22 
   8  -2  -2   64.92    4.83 
  -8  -2   2   55.46    3.85 
  -8  -2   2   60.52    3.83 
   8  -2  -2   57.54    5.76 
  -8  -2   2   60.98    4.20 
   8   2  -2   50.35    4.22 
   8   2  -2   49.30    4.49 
  -8   2   2   57.98    5.69 
  -8   2   2   57.41    4.69 
   8   2  -2   59.08    4.05 
   8   2  -2   57.42    4.30 
  -8   2   2   59.33    4.49 
  -7  -2   2   38.35    3.05 
  -7  -2   2   40.39    3.10 
   7  -2  -2   37.89    3.55 
  -7  -2   2   36.36    2.81 
  -7  -2   2   40.61    2.84 
   7  -2  -2   43.42    4.01 
   7  -2  -2   33.55    4.33 
  -7   2   2   45.99    4.32 
   7   2  -2   39.47    3.48 
   7   2  -2   43.58    3.21 
  -7   2   2   44.10    3.42 
   7   2  -2   42.38    3.47 
  -7   2   2   47.58    3.71 
  -7   2   2   45.65    3.53 
  -6  -2   2    0.78    0.67 
  -6  -2   2    1.28    0.70 
   6  -2  -2    0.18    1.74 
   6  -2  -2    0.53    0.88 
  -6  -2   2    0.50    0.81 
   6  -2  -2    1.13    1.19 
   6  -2  -2    0.01    1.15 
   6  -2  -2    0.67    0.98 
  -6   2   2    2.70    0.95 
   6   2  -2    0.85    1.00 
   6   2  -2    0.80    0.86 
   6   2  -2    1.37    0.70 
  -6   2   2    2.07    1.22 
  -6   2   2    3.39    1.55 
  -6   2   2    2.57    1.02 
  -5  -2   2  156.39    7.80 
   5  -2  -2  154.95    8.55 
  -5  -2   2  149.41    7.81 
   5  -2  -2  155.80    8.29 
  -5  -2   2  157.01    7.80 
   5  -2  -2  153.43    8.78 
   5  -2  -2  154.55    8.32 
  -5  -2   2  156.55    7.73 
   5  -2  -2  159.79    8.21 
  -5   2   2  154.79    8.32 
  -5   2   2  145.38    8.35 
  -5   2   2  153.69    8.00 
  -5   2   2  149.40    8.45 
   5   2  -2  160.71    7.98 
  -5   2   2  157.27    8.63 
   5   2  -2  148.34    7.78 
   5   2  -2  160.59    7.96 
   4  -2  -2  331.81   18.25 
  -4  -2   2  360.82   17.83 
   4  -2  -2  349.29   17.81 
  -4  -2   2  359.62   17.50 
  -4  -2   2  355.19   17.42 
   4  -2  -2  351.06   18.26 
   4  -2  -2  344.09   17.98 
   4  -2  -2  354.32   18.44 
  -4   2   2  382.45   18.39 
  -4   2   2  380.17   18.24 
  -4   2   2  381.60   18.37 
  -4   2   2  385.52   18.26 
   4   2  -2  378.36   17.84 
  -4   2   2  389.71   17.78 
   4   2  -2  396.53   17.99 
   4   2  -2  383.44   17.67 
   3  -2  -2  180.62    9.35 
  -3  -2   2  181.29    8.68 
  -3  -2   2  184.74    8.82 
   3  -2  -2  173.83    8.96 
   3  -2  -2  176.31    9.21 
   3  -2  -2  181.07    9.21 
  -3  -2   2  183.18    8.76 
   3  -2  -2  180.48    9.50 
  -3   2   2  173.62    9.33 
   3   2  -2  173.38    8.55 
  -3   2   2  180.74    9.28 
   3   2  -2  175.55    8.79 
  -3   2   2  178.14    9.28 
  -3   2   2  184.85    8.92 
   3   2  -2  182.05    8.87 
   3   2  -2  184.52    8.91 
  -3   2   2  166.60    9.23 
   2  -2  -2   62.80    4.05 
  -2  -2   2   63.18    3.40 
   2  -2  -2   64.03    3.65 
  -2  -2   2   63.72    3.34 
   2  -2  -2   65.09    3.57 
   2  -2  -2   68.68    3.83 
  -2  -2   2   63.05    3.42 
   2  -2  -2   66.40    3.82 
  -2  -2   2   67.38    3.37 
   2   2  -2   64.51    3.52 
   2   2  -2   62.38    3.31 
   2   2  -2   64.21    3.40 
  -2   2   2   62.04    3.66 
  -2   2   2   60.08    3.46 
  -2   2   2   57.39    3.80 
  -2   2   2   59.23    3.78 
  -2   2   2   59.64    3.68 
   2   2  -2   61.13    3.32 
  -1  -2   2   39.44    2.15 
   1  -2  -2   39.70    2.50 
   1  -2  -2   38.31    2.30 
  -1  -2   2   42.39    2.23 
  -1  -2   2   37.99    2.08 
   1  -2  -2   40.72    2.42 
  -1  -2   2   39.11    2.34 
   1  -2  -2   39.92    2.29 
   1   2  -2   30.95    2.22 
   1   2  -2   31.40    2.13 
  -1   2   2   30.00    2.42 
   1   2  -2   32.08    2.09 
  -1   2   2   32.58    2.27 
  -1   2   2   31.30    2.26 
   1   2  -2   30.72    2.03 
   0  -2  -2  136.68    7.27 
   0  -2   2  138.35    6.96 
   0  -2   2  136.35    7.23 
   0  -2   2  134.11    7.16 
   0  -2  -2  136.20    7.11 
   0  -2  -2  134.84    7.31 
   0  -2  -2  134.35    7.40 
   0  -2   2  138.22    7.27 
   0  -2   2  135.91    7.14 
   0  -2  -2  143.34    7.29 
   0   2  -2  146.25    6.96 
   0   2   2  149.26    7.36 
   0   2  -2  142.49    7.24 
   0   2  -2  145.91    7.28 
   0   2  -2  146.97    7.20 
   0   2   2  150.60    7.29 
   0   2  -2  149.51    7.22 
   0   2   2  149.07    7.29 
   0   2   2  147.61    7.49 
   0   2   2  146.78    7.13 
  -1  -2  -2  268.73   13.82 
  -1  -2  -2  263.23   13.88 
  -1  -2  -2  274.94   14.07 
   1  -2   2  266.06   13.80 
   1  -2   2  269.82   14.04 
   1  -2   2  283.62   14.16 
   1  -2   2  272.94   14.01 
   1  -2   2  267.23   13.59 
  -1  -2  -2  261.79   14.01 
  -1   2  -2  298.14   13.99 
   1   2   2  287.07   13.78 
  -1   2  -2  300.48   14.12 
   1   2   2  300.04   14.04 
  -1   2  -2  304.10   14.14 
  -1   2  -2  300.72   13.95 
  -1   2  -2  302.08   13.59 
   1   2   2  297.05   14.14 
   1   2   2  310.84   14.10 
   2  -2   2   82.78    4.46 
  -2  -2  -2   84.00    4.28 
   2  -2   2   80.58    4.36 
  -2  -2  -2   83.72    4.28 
   2  -2   2   79.83    4.49 
  -2  -2  -2   79.37    4.38 
  -2  -2  -2   83.89    4.36 
   2  -2   2   81.35    4.13 
   2  -2   2   73.68    4.68 
  -2   2  -2   76.40    4.41 
  -2   2  -2   74.65    4.51 
  -2   2  -2   76.76    4.38 
   2   2   2   76.08    4.18 
  -2   2  -2   76.09    4.03 
   2   2   2   73.70    4.45 
   2   2   2   71.29    4.25 
   2   2   2   72.92    4.14 
  -2   2  -2   74.39    4.50 
   3  -2   2  203.85   11.31 
   3  -2   2  208.65   11.23 
  -3  -2  -2  210.71   10.88 
   3  -2   2  204.21   10.64 
  -3  -2  -2  215.34   10.78 
  -3  -2  -2  214.44   10.75 
   3  -2   2  212.06   11.05 
  -3  -2  -2  207.86   10.89 
   3  -2   2  200.08   10.91 
   3   2   2  227.78   11.02 
  -3   2  -2  227.64   10.62 
   3   2   2  228.64   11.04 
   3   2   2  225.69   10.86 
  -3   2  -2  218.34   11.15 
  -3   2  -2  225.24   11.20 
  -3   2  -2  239.52   11.20 
  -3   2  -2  226.84   11.16 
   4  -2   2  353.71   17.39 
  -4  -2  -2  342.35   17.06 
   4  -2   2  357.42   17.88 
   4  -2   2  356.35   17.63 
  -4  -2  -2  346.29   17.38 
  -4  -2  -2  351.04   17.45 
  -4  -2  -2  363.55   17.17 
   4  -2   2  336.30   17.79 
   4  -2   2  355.98   17.12 
  -4   2  -2  340.81   17.71 
  -4   2  -2  338.22   17.54 
  -4   2  -2  349.16   17.65 
   4   2   2  378.73   17.42 
   4   2   2  353.24   17.36 
   4   2   2  372.44   17.58 
  -4   2  -2  346.80   16.99 
  -5  -2  -2  101.05    5.23 
   5  -2   2   96.81    5.58 
   5  -2   2  100.88    5.74 
   5  -2   2   97.05    6.16 
  -5  -2  -2  100.00    5.19 
  -5  -2  -2   94.97    5.14 
   5  -2   2   95.12    5.26 
  -5  -2  -2   98.09    5.07 
   5  -2   2   95.39    5.34 
  -5   2  -2   76.75    5.34 
   5   2   2   81.10    5.16 
   5   2   2   75.24    4.90 
  -5   2  -2   79.94    5.69 
   5   2   2   75.28    5.32 
  -5   2  -2   78.08    5.23 
   6  -2   2   12.42    2.58 
  -6  -2  -2   10.06    1.49 
   6  -2   2   11.05    1.81 
   6  -2   2   10.83    1.74 
  -6  -2  -2   11.17    1.72 
  -6  -2  -2   12.42    1.75 
  -6  -2  -2   14.60    1.79 
   6  -2   2   14.24    2.31 
   6  -2   2   12.49    1.71 
   6   2   2    6.62    1.41 
  -6   2  -2    8.89    1.56 
  -6   2  -2    5.34    1.59 
  -6   2  -2    9.27    2.15 
   6   2   2    5.69    1.68 
   6   2   2    6.96    1.29 
   7  -2   2   52.55    4.34 
   7  -2   2   51.81    4.49 
  -7  -2  -2   50.41    3.98 
  -7  -2  -2   48.71    4.10 
  -7  -2  -2   56.63    3.81 
  -7  -2  -2   56.29    4.16 
   7  -2   2   57.50    4.71 
  -7   2  -2   62.89    4.28 
   7   2   2   54.18    4.82 
   7   2   2   54.88    3.88 
  -7   2  -2   55.20    4.65 
   7   2   2   57.23    4.31 
  -7   2  -2   66.80    5.26 
   8  -2   2    2.80    2.16 
   8  -2   2    2.99    1.95 
  -8  -2  -2    2.80    2.05 
   8  -2   2    2.46    2.08 
   8  -2   2    4.28    2.88 
  -8  -2  -2    2.44    1.68 
  -8  -2  -2    3.58    1.44 
   8   2   2    3.29    1.87 
   8   2   2    8.56    2.07 
   8   2   2    2.59    2.42 
  -8   2  -2    6.23    2.64 
  -8   2  -2    5.46    1.65 
  -8   2  -2    6.43    2.12 
  -9  -2  -2   71.04    5.54 
   9  -2   2   64.43    6.06 
   9  -2   2   52.58    6.93 
   9  -2   2   67.38    6.44 
  -9  -2  -2   68.21    4.89 
  -9  -2  -2   66.89    5.20 
   9  -2   2   61.02    5.65 
   9   2   2   62.83    5.31 
   9   2   2   56.11    4.90 
   9   2   2   53.55    6.44 
  -9   2  -2   57.85    5.51 
  -9   2  -2   53.89    5.17 
  10  -2   2   16.64    4.09 
  10  -2   2   24.65    4.59 
  10  -2   2   17.40    3.65 
  10  -2   2   14.05    5.02 
 -10  -2  -2   20.56    4.03 
 -10  -2  -2   17.30    2.92 
  10   2   2   22.60    3.49 
 -10   2  -2   22.85    3.70 
  10   2   2   23.94    3.45 
 -10   2  -2   21.78    4.92 
 -10   2  -2   25.02    3.78 
  10  -3  -2   -0.14    3.35 
  10  -3  -2    0.81    2.97 
  10  -3  -2    4.56    3.86 
  10  -3  -2    3.11    4.60 
 -10  -3   2    0.89    1.75 
 -10   3   2    3.42    2.81 
 -10   3   2    1.20    4.31 
  10   3  -2    1.03    2.59 
 -10   3   2    4.63    3.17 
  10   3  -2   -0.82    2.62 
   9  -3  -2    5.05    3.63 
  -9  -3   2    2.66    1.70 
  -9  -3   2    1.65    2.41 
   9  -3  -2    4.67    2.65 
  -9  -3   2    3.84    1.55 
  -9  -3   2    4.61    2.11 
   9  -3  -2    1.21    3.07 
   9  -3  -2   -0.03    3.13 
   9   3  -2    6.24    2.73 
  -9   3   2    3.08    2.23 
   9   3  -2    4.56    2.12 
   9   3  -2    4.26    1.94 
   9   3  -2    3.92    2.39 
   8  -3  -2   51.84    5.35 
   8  -3  -2   46.38    4.95 
  -8  -3   2   46.08    4.42 
   8  -3  -2   50.05    4.71 
   8  -3  -2   50.12    6.02 
  -8  -3   2   43.24    3.48 
  -8  -3   2   46.38    3.80 
  -8  -3   2   50.68    3.44 
   8   3  -2   49.17    4.18 
  -8   3   2   49.07    4.68 
   8   3  -2   44.99    4.32 
   8   3  -2   41.46    4.57 
  -8   3   2   42.52    4.45 
  -8   3   2   42.34    4.43 
  -8   3   2   44.93    5.55 
   7  -3  -2  117.03    6.92 
  -7  -3   2  105.10    6.00 
   7  -3  -2  101.17    6.90 
  -7  -3   2  107.67    5.74 
  -7  -3   2  100.49    5.44 
   7  -3  -2  102.15    7.67 
  -7  -3   2   99.40    5.54 
  -7   3   2   93.27    6.26 
  -7   3   2   93.94    7.08 
  -7   3   2   87.60    5.91 
   7   3  -2   91.59    6.17 
  -7   3   2   87.97    6.34 
   7   3  -2   87.12    5.83 
  -6  -3   2   82.04    5.02 
   6  -3  -2   77.81    6.63 
  -6  -3   2   73.19    4.91 
   6  -3  -2   78.55    6.04 
  -6  -3   2   78.58    4.86 
  -6  -3   2   80.71    5.20 
   6  -3  -2   79.42    5.53 
   6  -3  -2   78.64    5.57 
   6  -3  -2   80.30    5.93 
   6   3  -2  103.39    5.30 
   6   3  -2  108.49    5.73 
  -6   3   2   98.68    5.95 
  -6   3   2  105.32    5.48 
  -6   3   2  101.09    6.32 
  -6   3   2  102.66    5.86 
  -6   3   2  104.34    6.51 
   6   3  -2  100.35    5.00 
   5  -3  -2  226.56   11.57 
   5  -3  -2  210.06   11.27 
   5  -3  -2  217.56   11.85 
  -5  -3   2  217.11   10.98 
   5  -3  -2  222.19   11.61 
   5  -3  -2  225.81   12.26 
  -5  -3   2  224.40   10.89 
  -5   3   2  219.00   11.84 
  -5   3   2  222.76   11.09 
  -5   3   2  218.08   11.70 
   5   3  -2  214.53   11.18 
   5   3  -2  216.52   11.12 
  -5   3   2  209.94   11.87 
   5   3  -2  209.39   10.86 
   4  -3  -2   67.37    4.07 
   4  -3  -2   65.72    4.85 
  -4  -3   2   70.55    3.88 
  -4  -3   2   69.92    3.61 
  -4  -3   2   66.38    3.65 
   4  -3  -2   73.39    4.53 
   4  -3  -2   70.83    4.17 
   4  -3  -2   75.59    4.59 
  -4   3   2   65.96    4.64 
  -4   3   2   57.73    3.83 
  -4   3   2   60.00    4.57 
   4   3  -2   57.00    4.00 
  -4   3   2   60.80    4.21 
   4   3  -2   55.27    3.68 
  -4   3   2   56.47    4.14 
   4   3  -2   60.21    3.51 
   4   3  -2   56.24    3.40 
  -3  -3   2   79.98    4.83 
   3  -3  -2   74.50    5.68 
  -3  -3   2   80.06    4.72 
   3  -3  -2   77.04    5.28 
   3  -3  -2   82.54    5.11 
   3  -3  -2   84.08    5.35 
  -3  -3   2   75.05    4.85 
   3  -3  -2   77.90    4.95 
  -3  -3   2   78.90    4.68 
   3   3  -2   99.49    4.92 
   3   3  -2   97.39    5.16 
  -3   3   2   97.54    5.63 
  -3   3   2   90.78    5.58 
   3   3  -2   99.12    4.73 
   3   3  -2   95.87    4.71 
  -3   3   2   93.30    5.30 
  -3   3   2   96.24    5.32 
  -3   3   2  102.40    4.98 
  -2  -3   2   42.93    2.60 
   2  -3  -2   40.13    3.07 
   2  -3  -2   43.40    2.85 
   2  -3  -2   44.07    2.94 
  -2  -3   2   41.79    2.81 
  -2  -3   2   39.64    2.92 
   2  -3  -2   42.19    3.18 
   2  -3  -2   44.62    3.52 
  -2  -3   2   38.88    2.56 
  -2   3   2   40.83    3.22 
   2   3  -2   41.66    2.94 
   2   3  -2   38.00    2.63 
  -2   3   2   41.73    3.01 
   2   3  -2   40.42    2.66 
  -2   3   2   43.79    2.75 
   2   3  -2   40.63    2.56 
  -2   3   2   38.34    2.90 
  -2   3   2   43.53    3.27 
  -1  -3   2   35.13    2.81 
  -1  -3   2   32.67    2.41 
   1  -3  -2   34.99    2.74 
  -1  -3   2   34.87    2.35 
   1  -3  -2   34.10    2.51 
   1  -3  -2   36.62    3.13 
   1  -3  -2   34.94    2.49 
  -1  -3   2   32.71    2.27 
   1  -3  -2   34.74    2.63 
  -1   3   2   35.84    2.60 
  -1   3   2   26.99    2.80 
   1   3  -2   34.11    2.29 
  -1   3   2   35.26    2.36 
   1   3  -2   33.35    2.32 
  -1   3   2   36.19    2.54 
   1   3  -2   34.20    2.61 
  -1   3   2   32.15    2.72 
   1   3  -2   35.50    2.28 
   1   3  -2   32.89    2.46 
   0  -3   2   35.39    2.61 
   0  -3   2   32.25    2.44 
   0  -3  -2   32.90    3.08 
   0  -3  -2   34.19    2.80 
   0  -3  -2   30.67    2.54 
   0  -3   2   33.24    3.04 
   0  -3   2   33.02    2.61 
   0  -3  -2   35.40    2.63 
   0   3   2   42.66    2.67 
   0   3  -2   43.89    2.68 
   0   3  -2   39.89    2.92 
   0   3   2   45.16    2.82 
   0   3   2   40.44    3.12 
   0   3   2   38.22    2.74 
   0   3  -2   44.33    2.63 
   0   3  -2   39.04    2.39 
   0   3  -2   40.57    2.77 
   1  -3   2   43.30    2.69 
   1  -3   2   41.47    2.55 
   1  -3   2   41.01    2.81 
  -1  -3  -2   40.71    2.67 
  -1  -3  -2   47.23    3.05 
   1  -3   2   42.07    2.86 
  -1  -3  -2   43.51    2.71 
   1  -3   2   42.52    3.30 
  -1  -3  -2   42.71    3.09 
   1   3   2   35.91    2.73 
  -1   3  -2   35.51    2.69 
   1   3   2   32.99    2.64 
   1   3   2   34.38    2.57 
  -1   3  -2   36.13    2.67 
  -1   3  -2   35.95    2.41 
   1   3   2   32.39    3.04 
  -1   3  -2   32.76    2.81 
   1   3   2   35.55    2.60 
   2  -3   2  364.03   18.39 
  -2  -3  -2  350.27   18.64 
   2  -3   2  350.99   19.11 
   2  -3   2  365.80   18.72 
  -2  -3  -2  367.87   18.65 
  -2  -3  -2  353.01   18.89 
   2  -3   2  374.28   18.99 
   2  -3   2  367.23   19.09 
  -2  -3  -2  368.98   18.90 
  -2   3  -2  397.39   19.12 
  -2   3  -2  412.03   19.14 
   2   3   2  397.44   18.53 
   2   3   2  399.74   18.98 
  -2   3  -2  385.01   18.90 
   2   3   2  411.76   18.89 
  -2   3  -2  399.22   18.34 
   2   3   2  417.23   19.11 
  -2   3  -2  400.24   18.99 
   3  -3   2  124.70    6.98 
   3  -3   2  123.22    7.38 
  -3  -3  -2  129.71    6.65 
   3  -3   2  119.13    6.38 
  -3  -3  -2  124.53    6.50 
  -3  -3  -2  123.54    6.52 
   3  -3   2  123.48    6.71 
  -3   3  -2  117.42    6.24 
   3   3   2  115.27    6.31 
  -3   3  -2  115.49    6.81 
   3   3   2  117.43    6.88 
  -3   3  -2  114.12    6.96 
   3   3   2  114.10    6.36 
  -3   3  -2  116.94    6.96 
   4  -3   2   47.23    3.31 
  -4  -3  -2   50.10    3.50 
  -4  -3  -2   49.15    3.35 
   4  -3   2   49.42    3.71 
   4  -3   2   48.03    3.49 
  -4  -3  -2   49.89    3.19 
   4  -3   2   47.20    4.25 
   4  -3   2   47.97    3.87 
  -4  -3  -2   47.80    3.26 
  -4   3  -2   48.91    4.13 
  -4   3  -2   47.16    3.54 
   4   3   2   49.80    3.95 
  -4   3  -2   48.06    3.69 
   4   3   2   48.54    3.11 
   4   3   2   50.08    3.38 
  -4   3  -2   47.21    4.01 
  -4   3  -2   51.16    3.15 
  -5  -3  -2   27.25    2.67 
   5  -3   2   25.15    3.16 
   5  -3   2   21.08    2.94 
   5  -3   2   23.58    2.53 
  -5  -3  -2   22.64    2.35 
   5  -3   2   23.73    2.55 
  -5  -3  -2   25.47    2.40 
   5  -3   2   28.50    3.73 
  -5  -3  -2   25.01    2.20 
   5   3   2   19.31    2.61 
   5   3   2   20.29    2.45 
  -5   3  -2   22.81    2.18 
  -5   3  -2   20.73    2.60 
  -5   3  -2   20.33    2.81 
  -5   3  -2   22.57    3.06 
   5   3   2   19.69    2.08 
  -6  -3  -2   11.81    2.03 
  -6  -3  -2    9.05    1.46 
   6  -3   2    8.06    1.70 
   6  -3   2   10.22    2.12 
  -6  -3  -2    8.77    1.76 
   6  -3   2   11.71    2.06 
   6  -3   2   12.04    3.09 
  -6  -3  -2    9.59    1.72 
   6  -3   2   10.52    2.35 
  -6   3  -2   10.00    2.12 
  -6   3  -2   11.61    2.00 
   6   3   2   10.80    1.87 
  -6   3  -2   10.30    2.70 
   6   3   2   11.76    2.47 
   6   3   2    9.80    1.45 
  -6   3  -2   10.76    1.70 
   7  -3   2    5.30    3.04 
  -7  -3  -2    6.18    1.78 
  -7  -3  -2    6.84    1.44 
  -7  -3  -2    6.27    1.91 
   7  -3   2    9.44    2.67 
   7  -3   2    5.83    2.44 
  -7   3  -2   12.49    3.04 
   7   3   2    8.23    2.81 
   7   3   2    6.94    1.59 
  -7   3  -2   10.41    2.05 
   7   3   2    8.62    2.10 
  -7   3  -2   12.87    2.50 
   8  -3   2   28.70    3.74 
   8  -3   2   22.19    3.67 
  -8  -3  -2   23.65    3.68 
   8  -3   2   21.17    3.26 
   8  -3   2   28.96    4.82 
  -8  -3  -2   30.03    3.99 
  -8  -3  -2   23.24    3.08 
  -8  -3  -2   26.07    3.05 
   8   3   2   33.42    4.19 
   8   3   2   22.99    4.07 
  -8   3  -2   28.66    4.00 
   8   3   2   26.61    3.43 
  -8   3  -2   28.67    4.47 
  -8   3  -2   32.47    4.33 
  -8   3  -2   25.49    3.27 
   9  -3   2   14.65    3.56 
   9  -3   2   15.21    4.26 
  -9  -3  -2   11.92    3.17 
   9  -3   2    5.66    3.81 
   9  -3   2   14.86    3.93 
  -9  -3  -2   12.30    2.40 
   9   3   2   11.20    4.22 
  -9   3  -2   15.02    3.39 
  -9   3  -2   15.03    4.47 
   9   3   2   13.39    3.06 
  10  -3   2   23.94    6.21 
 -10  -3  -2   32.19    4.36 
  10  -3   2   27.97    5.29 
  10  -3   2   28.42    4.67 
 -10   3  -2   21.62    4.46 
 -10   3  -2   15.95    5.74 
  10   3   2   20.59    3.73 
  10  -4  -2   11.24    4.61 
  10  -4  -2    2.39    5.94 
  10  -4  -2   15.74    4.56 
 -10  -4   2   10.88    2.36 
 -10   4   2   14.58    4.01 
  10   4  -2   10.32    3.65 
 -10   4   2   16.57    5.92 
  -9  -4   2   16.11    2.20 
   9  -4  -2   20.27    4.40 
   9  -4  -2   14.52    5.34 
   9  -4  -2   15.42    3.71 
  -9  -4   2   18.06    3.66 
  -9   4   2   14.70    3.41 
   9   4  -2   12.41    3.21 
  -9   4   2    8.76    4.51 
  -9   4   2    7.36    3.51 
   8  -4  -2   21.47    4.96 
   8  -4  -2   25.11    3.82 
   8  -4  -2   35.68    4.58 
  -8  -4   2   32.95    3.78 
  -8  -4   2   25.06    2.76 
   8  -4  -2   29.19    4.23 
   8   4  -2   35.26    4.27 
   8   4  -2   22.32    3.13 
  -8   4   2   26.13    3.64 
  -8   4   2   24.49    4.69 
   8   4  -2   28.23    4.00 
   7  -4  -2    3.98    2.75 
   7  -4  -2    1.66    2.12 
   7  -4  -2    0.28    2.68 
   7  -4  -2    3.87    2.15 
  -7  -4   2    3.41    1.18 
   7  -4  -2    0.22    3.09 
  -7  -4   2    0.96    2.04 
  -7  -4   2    2.97    1.65 
  -7   4   2    1.60    2.91 
  -7   4   2    4.62    1.95 
  -7   4   2    5.20    2.39 
  -7   4   2    4.68    2.10 
  -7   4   2    6.31    3.35 
   7   4  -2    4.85    1.27 
   7   4  -2    4.68    1.86 
   7   4  -2    4.93    2.32 
  -6  -4   2   17.10    1.96 
  -6  -4   2   19.54    2.58 
   6  -4  -2   15.24    3.68 
   6  -4  -2   15.44    2.48 
  -6  -4   2   16.67    2.13 
  -6  -4   2   18.87    2.51 
   6  -4  -2   19.22    3.16 
   6  -4  -2   14.72    2.86 
   6   4  -2   15.84    2.54 
  -6   4   2   16.30    2.62 
   6   4  -2   14.83    2.00 
  -6   4   2   11.92    1.96 
  -6   4   2   13.48    3.26 
  -6   4   2   18.90    2.89 
   6   4  -2   15.94    2.14 
  -6   4   2   16.27    3.58 
  -5  -4   2   77.38    5.08 
   5  -4  -2   73.50    5.26 
  -5  -4   2   76.51    4.48 
   5  -4  -2   70.03    5.74 
   5  -4  -2   74.96    6.45 
   5  -4  -2   76.54    5.64 
  -5  -4   2   71.89    4.58 
  -5  -4   2   75.50    4.69 
   5  -4  -2   77.96    5.26 
  -5   4   2   83.57    6.25 
  -5   4   2   85.16    4.95 
   5   4  -2   79.74    4.48 
   5   4  -2   78.77    5.46 
  -5   4   2   79.86    6.12 
  -5   4   2   79.76    5.50 
  -5   4   2   79.10    5.52 
   5   4  -2   83.41    4.91 
   4  -4  -2   88.55    5.65 
  -4  -4   2   89.44    5.27 
  -4  -4   2   91.95    5.46 
   4  -4  -2   90.04    5.54 
   4  -4  -2   97.10    6.19 
  -4  -4   2   89.76    4.99 
  -4  -4   2   85.65    5.04 
   4  -4  -2   88.19    6.88 
   4  -4  -2   90.54    6.07 
   4   4  -2   88.19    5.24 
  -4   4   2   88.07    6.21 
   4   4  -2   84.90    4.88 
   4   4  -2   88.00    4.94 
  -4   4   2   88.53    6.13 
  -4   4   2   88.17    5.26 
  -4   4   2   87.17    5.77 
  -4   4   2   87.64    5.78 
   4   4  -2   87.87    5.68 
   3  -4  -2   49.71    4.35 
   3  -4  -2   56.91    5.23 
  -3  -4   2   55.86    3.94 
  -3  -4   2   52.30    3.58 
  -3  -4   2   59.73    4.04 
  -3  -4   2   51.68    3.52 
   3  -4  -2   53.61    4.06 
   3  -4  -2   51.30    3.87 
   3  -4  -2   54.96    4.37 
   3   4  -2   61.25    3.66 
  -3   4   2   59.66    4.58 
   3   4  -2   57.30    4.08 
  -3   4   2   56.52    3.76 
  -3   4   2   65.73    5.02 
  -3   4   2   60.98    4.23 
   3   4  -2   57.66    3.77 
   3   4  -2   56.82    3.49 
  -3   4   2   61.80    4.21 
   2  -4  -2  124.61    6.91 
  -2  -4   2  119.82    6.32 
  -2  -4   2  130.72    6.63 
   2  -4  -2  123.14    7.60 
  -2  -4   2  124.86    6.34 
   2  -4  -2  128.18    6.76 
   2  -4  -2  124.80    6.99 
   2  -4  -2  133.15    6.63 
  -2  -4   2  124.70    6.82 
   2   4  -2  101.69    6.28 
  -2   4   2   99.63    6.62 
  -2   4   2  105.34    7.20 
   2   4  -2  104.61    6.28 
  -2   4   2  109.41    6.28 
  -2   4   2  104.07    6.60 
   2   4  -2  106.86    6.21 
  -2   4   2  101.25    6.82 
   2   4  -2  102.35    6.60 
   2   4  -2  108.53    6.37 
  -1  -4   2   49.47    3.75 
   1  -4  -2   50.88    3.75 
  -1  -4   2   48.71    3.55 
   1  -4  -2   49.87    3.96 
  -1  -4   2   49.42    3.50 
   1  -4  -2   51.11    3.70 
  -1  -4   2   54.49    4.28 
   1  -4  -2   48.77    3.83 
   1  -4  -2   49.37    4.52 
  -1   4   2   59.18    4.51 
  -1   4   2   54.93    4.14 
   1   4  -2   56.36    4.04 
   1   4  -2   55.03    3.50 
  -1   4   2   57.73    3.90 
  -1   4   2   55.74    3.82 
   1   4  -2   64.81    3.77 
   1   4  -2   59.55    3.60 
  -1   4   2   55.85    3.60 
   1   4  -2   60.56    3.82 
   0  -4   2   74.42    4.68 
   0  -4   2   72.37    5.39 
   0  -4  -2   71.15    4.75 
   0  -4   2   71.64    4.55 
   0  -4  -2   71.53    4.67 
   0  -4  -2   69.81    5.28 
   0  -4   2   73.42    4.72 
   0  -4  -2   72.81    5.00 
   0   4   2   72.99    4.86 
   0   4  -2   72.07    4.79 
   0   4   2   73.67    4.78 
   0   4  -2   82.17    5.17 
   0   4  -2   78.60    4.69 
   0   4  -2   75.76    4.35 
   0   4   2   79.00    5.29 
   0   4   2   79.22    4.56 
   0   4  -2   75.03    4.59 
   0   4   2   78.18    4.68 
   1  -4   2   71.61    4.32 
   1  -4   2   61.51    5.07 
  -1  -4  -2   65.76    4.29 
  -1  -4  -2   69.78    4.94 
  -1  -4  -2   68.37    4.37 
   1  -4   2   66.61    4.54 
  -1  -4  -2   65.59    4.63 
   1  -4   2   66.53    4.14 
   1  -4   2   63.14    4.43 
  -1   4  -2   66.14    4.37 
   1   4   2   70.03    4.50 
   1   4   2   70.06    4.28 
  -1   4  -2   69.92    4.45 
   1   4   2   66.27    4.46 
  -1   4  -2   72.33    4.11 
  -1   4  -2   66.09    4.65 
   1   4   2   68.39    4.99 
  -1   4  -2   71.41    4.84 
  -2  -4  -2   22.82    2.85 
   2  -4   2   22.47    2.61 
   2  -4   2   20.35    2.54 
   2  -4   2   17.09    2.74 
   2  -4   2   21.36    2.28 
  -2  -4  -2   20.94    2.22 
   2  -4   2   21.08    2.18 
  -2  -4  -2   15.79    2.15 
  -2  -4  -2   20.01    2.17 
  -2   4  -2   18.82    2.28 
   2   4   2   17.75    2.60 
  -2   4  -2   15.55    2.47 
   2   4   2   17.21    2.18 
   2   4   2   17.25    2.16 
   2   4   2   15.80    2.01 
  -2   4  -2   19.01    2.42 
   2   4   2   18.22    2.27 
  -2   4  -2   15.43    2.52 
  -2   4  -2   18.84    1.90 
   3  -4   2   72.68    5.13 
   3  -4   2   78.66    4.93 
  -3  -4  -2   72.35    4.65 
  -3  -4  -2   79.15    5.06 
  -3  -4  -2   72.94    4.99 
   3  -4   2   76.33    4.64 
   3  -4   2   70.27    5.10 
  -3  -4  -2   74.92    4.60 
   3  -4   2   82.56    6.01 
  -3   4  -2   74.38    4.40 
   3   4   2   76.26    5.42 
  -3   4  -2   69.40    5.27 
   3   4   2   74.43    4.53 
  -3   4  -2   76.03    4.98 
   3   4   2   71.61    4.75 
  -3   4  -2   74.38    5.48 
   3   4   2   74.95    4.52 
  -3   4  -2   73.38    5.06 
   4  -4   2   99.51    7.58 
   4  -4   2   89.56    6.35 
   4  -4   2   99.67    6.75 
   4  -4   2   94.87    6.07 
  -4  -4  -2   99.78    6.49 
  -4  -4  -2  101.32    6.00 
  -4  -4  -2  100.51    6.25 
   4  -4   2  102.40    6.40 
  -4  -4  -2   96.72    6.14 
  -4   4  -2  107.13    6.70 
   4   4   2  109.83    6.38 
  -4   4  -2  113.88    6.56 
   4   4   2  115.33    6.02 
  -4   4  -2  111.80    7.11 
   4   4   2  114.94    7.02 
   4   4   2  108.72    5.86 
  -4   4  -2  114.15    5.94 
  -4   4  -2  108.01    6.90 
  -5  -4  -2   51.70    4.46 
   5  -4   2   51.07    4.40 
  -5  -4  -2   53.10    3.58 
   5  -4   2   50.85    5.66 
  -5  -4  -2   53.01    3.95 
   5  -4   2   50.17    4.13 
   5  -4   2   49.62    4.04 
  -5  -4  -2   52.64    3.91 
   5  -4   2   50.35    4.74 
  -5   4  -2   47.16    4.18 
   5   4   2   49.22    5.15 
  -5   4  -2   48.63    4.52 
   5   4   2   49.85    3.58 
  -5   4  -2   42.00    3.56 
   5   4   2   48.63    4.08 
  -5   4  -2   46.62    4.96 
  -5   4  -2   49.25    4.99 
  -6  -4  -2   47.20    4.07 
   6  -4   2   45.77    6.22 
   6  -4   2   39.59    4.74 
   6  -4   2   50.19    4.39 
  -6  -4  -2   46.76    3.92 
   6  -4   2   45.83    5.05 
  -6  -4  -2   41.85    3.47 
  -6   4  -2   39.70    4.28 
   6   4   2   47.46    5.39 
   6   4   2   44.37    4.34 
   6   4   2   46.10    3.55 
  -6   4  -2   46.14    4.70 
  -6   4  -2   48.41    5.46 
  -6   4  -2   43.74    3.85 
   7  -4   2   32.62    3.87 
  -7  -4  -2   30.85    4.00 
  -7  -4  -2   25.85    3.18 
   7  -4   2   24.34    4.94 
   7  -4   2   31.38    4.34 
   7  -4   2   29.26    4.36 
  -7  -4  -2   30.55    3.90 
  -7  -4  -2   28.65    3.16 
   7  -4   2   33.46    4.24 
  -7   4  -2   35.59    4.87 
   7   4   2   36.11    4.40 
   7   4   2   31.91    3.34 
  -7   4  -2   26.22    3.61 
   7   4   2   34.09    4.57 
  -7   4  -2   31.86    4.71 
  -8  -4  -2    9.72    2.65 
  -8  -4  -2   10.26    2.09 
   8  -4   2    8.45    4.43 
   8  -4   2    8.06    2.92 
  -8  -4  -2    9.31    2.66 
   8  -4   2    6.73    3.50 
   8   4   2    4.23    2.07 
  -8   4  -2    7.09    3.16 
   8   4   2    8.25    3.96 
  -8   4  -2    5.35    3.94 
   9  -4   2   25.27    4.46 
   9  -4   2   32.17    5.35 
   9  -4   2   33.67    6.43 
  -9  -4  -2   29.32    4.00 
  -9   4  -2   24.82    4.22 
  -9   4  -2   20.86    5.66 
   9  -5  -2   10.16    4.31 
   9  -5  -2   16.54    5.43 
  -9  -5   2    7.96    2.28 
   9  -5  -2    8.32    6.59 
  -9   5   2    4.91    5.77 
  -9   5   2    9.30    3.71 
   8  -5  -2   47.83    6.28 
   8  -5  -2   55.67    7.82 
  -8  -5   2   43.87    3.73 
   8  -5  -2   51.83    6.40 
  -8   5   2   30.02    6.12 
  -8   5   2   36.21    5.04 
   7  -5  -2   60.46    5.90 
  -7  -5   2   50.31    4.64 
   7  -5  -2   55.40    7.24 
  -7  -5   2   45.52    5.79 
  -7  -5   2   48.97    3.81 
   7  -5  -2   58.28    7.24 
  -7   5   2   51.82    5.65 
  -7   5   2   49.97    6.20 
   7   5  -2   49.57    3.91 
   7   5  -2   50.31    5.98 
  -7   5   2   55.85    7.10 
   7   5  -2   44.98    4.87 
   6  -5  -2   42.54    4.64 
  -6  -5   2   39.70    3.17 
   6  -5  -2   42.92    5.01 
  -6  -5   2   35.38    3.87 
   6  -5  -2   51.05    5.94 
  -6  -5   2   36.76    3.47 
   6  -5  -2   43.08    5.07 
   6  -5  -2   38.12    5.61 
   6   5  -2   35.78    3.26 
  -6   5   2   31.87    4.04 
  -6   5   2   27.34    3.69 
   6   5  -2   33.09    3.94 
  -6   5   2   31.08    4.78 
   6   5  -2   34.82    4.09 
  -5  -5   2   10.71    1.71 
   5  -5  -2   11.33    2.44 
  -5  -5   2   13.19    2.54 
  -5  -5   2    9.78    1.79 
  -5  -5   2    9.58    2.06 
   5  -5  -2   10.41    3.05 
   5  -5  -2   13.38    4.07 
   5  -5  -2   10.42    2.84 
   5   5  -2   11.78    1.59 
  -5   5   2   10.79    2.41 
   5   5  -2   11.75    1.74 
  -5   5   2   12.83    3.26 
  -5   5   2   12.88    2.25 
  -5   5   2   16.39    3.84 
   5   5  -2   14.97    2.27 
   5   5  -2   15.55    2.82 
  -4  -5   2   58.28    4.51 
   4  -5  -2   51.49    4.61 
   4  -5  -2   50.10    5.08 
  -4  -5   2   50.94    3.80 
  -4  -5   2   50.37    4.73 
  -4  -5   2   58.00    3.82 
  -4   5   2   50.06    5.46 
  -4   5   2   48.13    4.83 
  -4   5   2   51.05    4.05 
   4   5  -2   59.46    4.24 
   4   5  -2   45.17    4.24 
   4   5  -2   51.22    3.68 
   4   5  -2   56.72    4.95 
   4   5  -2   51.75    3.66 
  -4   5   2   59.51    5.90 
  -4   5   2   47.21    4.64 
  -3  -5   2   17.01    2.49 
   3  -5  -2   15.70    2.68 
  -3  -5   2   16.17    2.70 
  -3  -5   2   13.83    1.88 
   3  -5  -2   16.05    2.51 
   3  -5  -2   19.58    3.84 
   3  -5  -2   14.21    2.60 
   3  -5  -2   12.12    2.60 
  -3  -5   2   13.70    2.01 
   3   5  -2   20.90    2.61 
   3   5  -2   22.58    2.86 
   3   5  -2   17.91    2.33 
  -3   5   2   20.91    2.73 
  -3   5   2   21.09    2.88 
  -3   5   2   22.30    2.51 
   3   5  -2   23.06    2.81 
  -3   5   2   19.55    3.39 
   3   5  -2   20.33    2.95 
   2  -5  -2   38.53    3.79 
   2  -5  -2   38.08    3.62 
   2  -5  -2   36.12    4.13 
  -2  -5   2   41.84    3.82 
   2  -5  -2   37.91    4.70 
  -2  -5   2   36.44    3.29 
   2  -5  -2   41.96    4.02 
  -2  -5   2   37.44    3.39 
  -2  -5   2   41.92    4.36 
   2   5  -2   45.11    3.75 
   2   5  -2   43.93    3.34 
   2   5  -2   43.38    3.54 
   2   5  -2   46.57    3.51 
  -2   5   2   36.48    4.74 
   2   5  -2   45.68    4.24 
  -2   5   2   42.91    3.53 
  -2   5   2   41.13    3.79 
  -2   5   2   36.58    4.11 
  -2   5   2   42.31    4.02 
  -1  -5   2  193.88   10.67 
   1  -5  -2  187.76   10.98 
  -1  -5   2  195.03    9.95 
   1  -5  -2  191.54   10.14 
  -1  -5   2  185.11    9.80 
   1  -5  -2  177.54   10.16 
  -1  -5   2  185.69   10.00 
   1  -5  -2  196.58   10.77 
  -1   5   2  174.59   10.13 
   1   5  -2  173.05    9.82 
  -1   5   2  168.02   10.14 
   1   5  -2  174.88    9.92 
   1   5  -2  175.40   10.18 
  -1   5   2  171.74    9.63 
   1   5  -2  174.61    9.53 
  -1   5   2  165.59    9.96 
   1   5  -2  174.59    9.72 
  -1   5   2  175.48   10.61 
   0  -5  -2   26.83    3.76 
   0  -5  -2   29.01    3.20 
   0  -5   2   25.37    3.03 
   0  -5   2   30.71    3.10 
   0  -5   2   28.70    3.50 
   0  -5  -2   27.38    3.20 
   0  -5   2   31.75    4.24 
   0   5   2   31.48    4.32 
   0   5  -2   35.64    3.48 
   0   5   2   31.28    3.24 
   0   5  -2   33.71    3.10 
   0   5   2   31.03    3.07 
   0   5  -2   33.29    2.90 
   0   5  -2   30.70    3.17 
   0   5  -2   39.18    4.33 
   0   5   2   33.42    3.70 
  -1  -5  -2   32.67    4.21 
  -1  -5  -2   26.82    3.02 
   1  -5   2   27.15    3.99 
   1  -5   2   26.38    3.24 
  -1  -5  -2   27.98    3.76 
   1  -5   2   27.81    3.07 
  -1  -5  -2   28.82    3.21 
  -1   5  -2   33.71    2.98 
   1   5   2   38.49    3.19 
   1   5   2   38.27    4.32 
   1   5   2   38.49    3.53 
  -1   5  -2   30.77    3.64 
   1   5   2   35.86    3.24 
  -1   5  -2   30.67    3.22 
   1   5   2   29.51    3.57 
  -2  -5  -2  102.87    6.59 
  -2  -5  -2  101.87    6.93 
   2  -5   2  100.35    6.29 
   2  -5   2   99.92    6.56 
   2  -5   2  100.32    6.87 
  -2  -5  -2   96.40    7.06 
   2  -5   2  105.10    7.97 
  -2  -5  -2   98.13    6.41 
   2   5   2  112.41    6.37 
   2   5   2  105.74    6.50 
  -2   5  -2  112.01    6.80 
  -2   5  -2  106.98    7.08 
   2   5   2  113.04    6.77 
   2   5   2  114.66    7.45 
   2   5   2  118.23    6.66 
  -2   5  -2  113.85    6.18 
  -2   5  -2  112.25    7.47 
   3  -5   2   43.99    5.58 
   3  -5   2   36.57    3.61 
  -3  -5  -2   40.38    4.12 
  -3  -5  -2   40.44    3.99 
   3  -5   2   40.86    4.11 
   3   5   2   23.79    3.25 
  -3   5  -2   24.42    3.65 
  -3   5  -2   25.68    3.53 
   3   5   2   31.38    4.10 
  -3   5  -2   28.11    2.85 
  -3   5  -2   23.50    3.56 
   3   5   2   26.60    3.30 
   3   5   2   29.07    3.00 
  -4  -5  -2   26.62    3.42 
  -4  -5  -2   35.42    3.95 
   4  -5   2   23.60    4.16 
   4  -5   2   28.30    3.48 
   4  -5   2   23.80    3.39 
   4  -5   2   31.70    4.00 
   4  -5   2   34.49    4.27 
  -4  -5  -2   27.43    3.09 
   4   5   2   39.26    5.28 
  -4   5  -2   35.23    4.21 
  -4   5  -2   34.05    4.33 
  -4   5  -2   34.06    4.42 
  -4   5  -2   38.81    3.25 
   4   5   2   37.00    3.17 
   4   5   2   31.70    4.00 
   4   5   2   34.61    3.08 
   4   5   2   26.60    3.54 
  -5  -5  -2   47.67    4.41 
   5  -5   2   46.90    6.25 
   5  -5   2   44.73    5.36 
  -5  -5  -2   46.55    3.87 
  -5  -5  -2   46.19    4.50 
  -5  -5  -2   50.81    5.31 
   5  -5   2   45.43    5.57 
  -5   5  -2   46.22    3.99 
   5   5   2   52.91    4.86 
  -5   5  -2   44.76    4.81 
   5   5   2   48.93    3.88 
  -5   5  -2   50.09    5.09 
  -5   5  -2   54.70    5.95 
  -5   5  -2   50.79    5.97 
   5   5   2   49.38    6.14 
  -6  -5  -2   13.28    2.22 
   6  -5   2   17.28    3.34 
   6  -5   2   18.71    3.08 
  -6  -5  -2   18.56    2.76 
   6  -5   2   19.22    3.90 
  -6  -5  -2   19.14    2.97 
   6  -5   2   13.95    4.80 
  -6   5  -2   14.61    2.68 
   6   5   2   14.71    2.26 
  -6   5  -2   12.88    3.79 
   6   5   2   15.12    4.00 
  -6   5  -2   12.83    3.05 
   7  -5   2    7.72    3.65 
  -7  -5  -2    4.56    1.94 
  -7  -5  -2    5.12    2.71 
   7  -5   2    5.33    4.68 
   7  -5   2    5.13    2.86 
   7   5   2    1.43    1.95 
  -7   5  -2   -2.18    3.72 
  -7   5  -2    4.13    3.00 
   7   5   2    0.34    4.16 
  -8  -5  -2   20.20    2.97 
   8  -5   2   22.65    4.38 
   8  -5   2   31.17    5.63 
   8  -5   2   23.60    6.72 
  -8   5  -2   25.58    6.24 
  -8   5  -2   28.62    4.85 
   7  -6  -2    2.99    6.34 
   7  -6  -2    7.70    3.93 
  -7  -6   2    9.87    2.19 
   7  -6  -2   14.51    5.12 
  -7   6   2    4.66    5.23 
  -7   6   2    4.83    3.80 
   6  -6  -2   10.45    5.85 
   6  -6  -2   12.20    3.81 
  -6  -6   2   14.65    2.27 
   6  -6  -2   20.27    3.81 
  -6   6   2   11.08    3.50 
  -6   6   2   14.37    4.74 
   5  -6  -2   18.53    5.93 
   5  -6  -2   19.26    4.07 
  -5  -6   2   17.37    2.69 
   5  -6  -2   13.23    3.07 
  -5  -6   2   17.91    3.16 
  -5  -6   2   17.42    2.37 
   5   6  -2   17.20    2.24 
   5   6  -2   19.76    4.09 
  -5   6   2   19.75    3.58 
  -5   6   2   20.00    4.62 
   5   6  -2   16.06    2.41 
  -4  -6   2   22.65    3.45 
   4  -6  -2   17.61    3.19 
   4  -6  -2   20.41    4.92 
  -4  -6   2   19.73    2.83 
   4  -6  -2   23.79    3.61 
  -4  -6   2   20.70    2.58 
   4  -6  -2   26.27    4.12 
  -4  -6   2   22.40    3.63 
  -4   6   2   17.86    3.83 
   4   6  -2   20.70    2.62 
  -4   6   2   18.68    3.37 
   4   6  -2   20.77    2.61 
   4   6  -2   20.50    3.67 
  -4   6   2   21.91    4.67 
   4   6  -2   24.57    3.42 
  -3  -6   2   18.80    2.73 
   3  -6  -2   14.42    4.22 
   3  -6  -2   26.49    3.60 
  -3  -6   2   21.47    2.69 
  -3  -6   2   20.60    3.43 
  -3  -6   2   22.27    3.71 
   3  -6  -2   15.72    3.17 
   3  -6  -2   24.14    3.25 
  -3   6   2   18.20    3.18 
   3   6  -2   19.06    3.02 
  -3   6   2   19.87    2.93 
  -3   6   2   21.23    3.72 
   3   6  -2   21.64    2.77 
   3   6  -2   19.09    2.47 
   3   6  -2   18.02    2.84 
  -3   6   2   16.26    4.37 
   3   6  -2   19.07    3.58 
  -2  -6   2  101.12    6.73 
   2  -6  -2  109.78    7.42 
   2  -6  -2  108.20    9.60 
   2  -6  -2  104.76    7.28 
  -2  -6   2  109.23    6.72 
  -2  -6   2   95.74    7.33 
   2  -6  -2   94.15    7.61 
  -2  -6   2  110.11    7.79 
  -2   6   2  105.04    7.33 
  -2   6   2   97.82    7.47 
   2   6  -2   99.53    6.69 
   2   6  -2  105.45    6.92 
   2   6  -2  101.07    6.51 
  -2   6   2  104.02    6.84 
  -2   6   2   91.38    7.19 
  -2   6   2  107.30    8.65 
   2   6  -2  103.58    7.84 
   2   6  -2  102.80    7.02 
   1  -6  -2   12.04    2.44 
   1  -6  -2   13.62    2.94 
  -1  -6   2   17.18    3.91 
  -1  -6   2   15.86    3.23 
  -1  -6   2   13.56    2.46 
  -1  -6   2   13.32    2.51 
   1  -6  -2   16.57    4.56 
   1   6  -2   17.48    2.57 
  -1   6   2   19.07    4.06 
  -1   6   2   16.09    3.15 
   1   6  -2   15.19    2.92 
  -1   6   2   18.50    2.90 
  -1   6   2   18.57    2.85 
   1   6  -2   14.28    2.65 
   1   6  -2   15.90    2.58 
   0  -6   2   19.36    3.47 
   0  -6   2   22.28    3.05 
   0  -6  -2   21.90    3.09 
   0  -6  -2   20.10    4.12 
   0  -6   2   22.65    4.27 
   0  -6  -2   19.02    3.02 
   0  -6   2   24.08    3.09 
   0   6  -2   16.35    2.51 
   0   6  -2   21.75    2.85 
   0   6   2   21.75    3.03 
   0   6   2   22.45    3.00 
   0   6   2   25.27    4.30 
   0   6  -2   17.40    2.74 
   0   6  -2   19.37    3.17 
   0   6   2   15.66    2.97 
   0   6  -2   25.22    4.05 
   1  -6   2   50.50    4.79 
  -1  -6  -2   54.91    6.51 
  -1  -6  -2   44.85    5.58 
  -1  -6  -2   47.28    4.45 
  -1  -6  -2   48.77    4.86 
   1  -6   2   48.45    6.42 
   1  -6   2   39.82    4.98 
   1  -6   2   50.58    4.71 
   1   6   2   48.22    6.49 
  -1   6  -2   59.07    6.47 
  -1   6  -2   47.39    4.71 
  -1   6  -2   50.51    5.24 
   1   6   2   48.53    4.88 
  -1   6  -2   51.80    4.32 
   1   6   2   51.62    4.52 
   1   6   2   57.35    4.85 
   2  -6   2    3.31    2.29 
  -2  -6  -2    2.41    1.80 
  -2  -6  -2    1.69    2.98 
  -2  -6  -2    6.16    3.23 
   2  -6   2    4.86    2.05 
   2  -6   2    5.53    3.72 
   2   6   2    5.98    1.90 
  -2   6  -2    2.07    3.05 
   2   6   2    5.64    3.29 
  -2   6  -2    5.63    2.31 
  -2   6  -2    5.24    1.91 
  -2   6  -2    3.30    2.45 
   2   6   2    5.22    2.10 
   2   6   2    5.83    2.37 
  -3  -6  -2    2.24    2.65 
  -3  -6  -2    4.57    1.96 
   3  -6   2    1.59    4.14 
  -3  -6  -2   -0.27    2.25 
   3  -6   2    7.82    2.66 
   3  -6   2    4.17    2.10 
   3  -6   2    3.47    2.27 
  -3   6  -2    5.93    3.78 
  -3   6  -2    1.70    2.65 
   3   6   2    6.76    3.62 
   3   6   2    2.76    2.04 
   3   6   2    3.41    1.85 
  -3   6  -2    3.09    1.83 
  -3   6  -2    2.04    2.53 
  -4  -6  -2   39.48    5.51 
  -4  -6  -2   49.05    5.16 
   4  -6   2   43.00    4.83 
   4  -6   2   45.23    5.91 
  -4  -6  -2   41.85    4.28 
   4  -6   2   46.15    6.47 
  -4   6  -2   35.29    4.32 
  -4   6  -2   42.06    5.35 
  -4   6  -2   37.47    5.45 
   4   6   2   41.09    5.52 
   4   6   2   43.78    4.10 
  -4   6  -2   42.44    5.88 
   4   6   2   45.51    4.26 
  -5  -6  -2   15.80    3.30 
   5  -6   2   16.03    3.14 
   5  -6   2   14.09    6.13 
   5  -6   2   20.30    4.16 
  -5  -6  -2   10.87    2.38 
  -5   6  -2   16.44    4.56 
   5   6   2   15.35    2.49 
  -5   6  -2   10.64    3.27 
   5   6   2   17.28    2.68 
  -5   6  -2   12.07    3.10 
   6  -6   2   47.33    7.89 
   6  -6   2   58.17    7.94 
   6  -6   2   47.44    6.01 
  -6  -6  -2   50.65    6.06 
  -6  -6  -2   50.47    4.89 
  -6   6  -2   51.02    5.98 
  -6   6  -2   45.69    6.41 
   6   6   2   62.34    5.30 
   7  -6   2    5.40    5.06 
   7  -6   2    5.66    6.92 
  -7  -6  -2    7.24    2.41 
   7  -6   2    6.94    3.81 
  -7   6  -2    1.13    3.95 
  -7   6  -2    8.58    5.34 
   5  -7  -2    4.76    6.88 
   5  -7  -2    4.92    3.60 
   5  -7  -2    5.22    4.09 
  -5  -7   2    8.96    2.53 
  -5   7   2    7.10    4.39 
   5   7  -2    9.16    2.54 
  -5   7   2    0.12    5.00 
   4  -7  -2   10.61    3.84 
   4  -7  -2   13.23    6.42 
   4  -7  -2   12.84    3.69 
  -4  -7   2   13.46    2.76 
   4   7  -2   16.88    3.05 
  -4   7   2   12.97    4.81 
  -4   7   2   19.33    4.03 
   3  -7  -2   20.15    6.34 
   3  -7  -2   29.07    4.36 
  -3  -7   2   23.79    4.73 
  -3  -7   2   25.77    3.54 
   3   7  -2   24.31    3.49 
   3   7  -2   23.38    3.66 
  -3   7   2   29.51    5.17 
  -3   7   2   22.07    4.03 
   2  -7  -2    3.29    3.70 
   2  -7  -2    2.89    5.29 
  -2  -7   2    5.29    2.71 
   2  -7  -2    6.22    2.85 
  -2  -7   2    5.76    4.36 
   2   7  -2    7.19    2.96 
  -2   7   2    3.44    3.11 
  -2   7   2   -0.32    5.11 
   2   7  -2    2.51    2.50 
  -2   7   2    4.54    3.59 
  -1  -7   2   36.11    4.97 
   1  -7  -2   52.27    6.86 
   1  -7  -2   41.89    5.43 
  -1  -7   2   46.32    5.95 
   1  -7  -2   38.18    5.31 
  -1  -7   2   45.01    6.24 
   1   7  -2   45.27    5.97 
   1   7  -2   52.83    6.19 
   1   7  -2   47.70    5.61 
  -1   7   2   60.11    6.18 
  -1   7   2   55.54    6.28 
  -1   7   2   49.84    7.05 
   0  -7  -2   54.66    6.64 
   0  -7   2   55.62    6.20 
   0  -7  -2   61.11    5.54 
   0  -7   2   56.62    5.76 
   0  -7   2   62.92    7.16 
   0  -7  -2   69.24    8.91 
   0   7   2   55.44    7.21 
   0   7  -2   45.51    5.75 
   0   7  -2   43.49    6.46 
   0   7   2   49.76    6.22 
   0   7  -2   43.10    5.96 
   0   7  -2   53.05    6.31 
  -1  -7  -2   25.23    4.41 
   1  -7   2   25.23    4.20 
  -1  -7  -2   17.53    3.39 
   1  -7   2   19.22    3.67 
   1   7   2   27.78    5.93 
  -1   7  -2   21.98    4.35 
  -1   7  -2   25.76    4.15 
   1   7   2   20.59    3.97 
   1   7   2   28.11    3.94 
  -1   7  -2   25.75    5.79 
  -2  -7  -2   12.83    4.43 
  -2  -7  -2    7.77    2.87 
   2  -7   2   11.50    5.34 
   2  -7   2    5.10    2.94 
   2  -7   2   10.54    3.40 
  -2   7  -2    6.53    3.19 
  -2   7  -2   13.69    3.95 
   2   7   2    6.37    3.01 
   2   7   2   15.80    5.35 
   2   7   2   10.62    3.12 
  -2   7  -2   14.89    5.82 
   3  -7   2   26.14    4.96 
  -3  -7  -2   25.77    4.98 
   3  -7   2   21.68    4.28 
   3  -7   2   20.77    6.11 
  -3  -7  -2   27.86    3.76 
   3   7   2   20.23    3.49 
  -3   7  -2   30.00    4.76 
   3   7   2   20.66    3.54 
  -3   7  -2   17.08    4.51 
   4  -7   2   17.85    7.24 
  -4  -7  -2    8.89    2.83 
   4  -7   2   15.79    3.71 
   4  -7   2    8.93    3.94 
  -4  -7  -2   15.00    4.58 
  -4   7  -2    9.76    4.00 
  -4   7  -2   11.88    4.75 
   4   7   2   12.14    3.09 
   4   7   2   12.19    3.01 
 -11   0   3    8.19    2.64 
  11   0  -3    7.18    3.00 
  11   0  -3    7.12    3.23 
 -11   0   3   10.15    3.93 
  11   0  -3    9.12    4.00 
  10   0  -3   21.63    3.02 
  10   0  -3   28.26    3.89 
  10   0  -3   24.51    4.08 
 -10   0   3   24.00    3.81 
 -10   0   3   24.78    2.98 
  10   0  -3   21.97    3.31 
 -10   0   3   25.27    3.12 
   9   0  -3   28.35    3.42 
  -9   0   3   26.40    3.46 
   9   0  -3   29.22    3.59 
   9   0  -3   26.16    3.05 
   9   0  -3   24.66    3.50 
  -9   0   3   30.45    2.84 
  -9   0   3   26.02    3.10 
   9   0  -3   25.40    3.28 
  -8   0   3  341.12   17.13 
   8   0  -3  331.97   17.23 
   8   0  -3  350.35   16.84 
   8   0  -3  335.29   17.27 
   8   0  -3  314.53   16.98 
  -8   0   3  339.12   17.08 
  -8   0   3  348.35   16.97 
   8   0  -3  340.77   17.02 
   7   0  -3    8.44    1.83 
   7   0  -3    7.07    1.34 
   7   0  -3    8.38    1.51 
   7   0  -3    8.42    1.22 
  -7   0   3    7.94    1.35 
  -7   0   3    7.91    1.69 
   7   0  -3    8.72    1.46 
  -7   0   3    9.12    1.27 
  -6   0   3    0.18    0.99 
   6   0  -3    0.87    0.84 
  -6   0   3    1.20    0.64 
   6   0  -3    0.73    1.07 
   6   0  -3   -0.25    0.78 
   6   0  -3    1.26    0.82 
  -6   0   3    1.24    0.77 
   5   0  -3   11.18    1.47 
  -5   0   3   10.50    1.38 
  -5   0   3   11.80    1.18 
  -5   0   3   13.31    1.34 
   5   0  -3   13.01    1.44 
   5   0  -3   13.22    1.79 
   5   0  -3   11.88    1.31 
   5   0  -3   13.49    1.22 
   4   0  -3   35.90    2.34 
  -4   0   3   36.57    2.23 
   4   0  -3   37.61    2.46 
  -4   0   3   40.22    2.44 
   4   0  -3   35.52    2.23 
   4   0  -3   36.57    2.16 
   4   0  -3   35.58    2.23 
   3   0  -3    0.62    0.39 
   3   0  -3    0.89    0.39 
  -3   0   3    0.90    0.31 
  -3   0   3    0.87    0.36 
   3   0  -3    0.50    0.32 
   3   0  -3    0.67    0.50 
  -3   0   3    0.94    0.43 
  -3   0   3    1.01    0.41 
   3   0  -3    0.48    0.32 
  -3   0   3    0.70    0.40 
  -2   0   3  283.64   13.42 
   2   0  -3  274.98   13.18 
   2   0  -3  270.40   13.42 
   2   0  -3  270.85   13.14 
  -2   0   3  280.41   13.18 
   2   0  -3  278.07   13.09 
   2   0  -3  289.35   13.42 
  -2   0   3  278.02   13.13 
  -1   0   3  442.44   20.66 
   1   0  -3  463.43   21.19 
   1   0  -3  434.00   20.66 
  -1   0   3  422.66   21.19 
   1   0  -3  449.47   20.62 
   1   0  -3  441.47   21.19 
  -1   0   3  444.40   20.66 
   0   0   3  437.07   20.95 
   0   0   3  451.10   21.01 
   0   0   3  458.80   21.56 
   0   0  -3  458.85   21.01 
   0   0  -3  444.42   21.57 
   0   0  -3  463.41   21.57 
   0   0   3  440.61   21.57 
   0   0  -3  443.80   20.95 
  -1   0  -3  740.54   34.56 
   1   0   3  740.03   35.50 
   1   0   3  750.01   35.51 
  -1   0  -3  739.78   35.49 
   1   0   3  746.11   34.56 
  -1   0  -3  727.07   35.50 
  -2   0  -3   16.08    1.22 
   2   0   3   15.50    1.22 
  -2   0  -3   16.66    1.34 
   2   0   3   16.43    1.29 
  -2   0  -3   16.52    1.21 
   2   0   3   15.36    1.25 
  -3   0  -3    9.68    1.16 
  -3   0  -3   10.11    1.07 
   3   0   3    9.28    1.14 
   3   0   3   10.83    1.16 
   3   0   3    8.52    1.14 
  -3   0  -3    9.62    1.06 
  -4   0  -3   89.81    4.92 
  -4   0  -3   89.10    4.93 
   4   0   3   90.06    4.95 
  -4   0  -3   86.19    4.99 
   4   0   3   90.18    4.88 
   4   0   3   88.31    4.98 
   5   0   3    9.07    1.30 
  -5   0  -3    6.86    1.12 
  -5   0  -3    5.95    1.23 
   5   0   3    9.76    1.44 
   5   0   3    7.45    1.18 
   5   0   3    8.54    1.38 
  -5   0  -3    7.49    1.12 
   6   0   3    5.94    1.34 
   6   0   3    5.48    1.37 
  -6   0  -3    7.14    1.23 
   6   0   3    5.12    1.29 
   6   0   3    3.49    1.33 
  -6   0  -3    3.06    1.35 
  -6   0  -3    5.95    1.33 
   7   0   3   44.28    3.47 
  -7   0  -3   46.29    3.42 
   7   0   3   46.14    3.53 
  -7   0  -3   39.20    3.82 
  -7   0  -3   45.31    3.52 
   7   0   3   42.08    3.65 
   7   0   3   46.98    3.75 
   8   0   3   94.75    6.03 
  -8   0  -3   92.18    6.46 
   8   0   3  103.12    6.34 
   8   0   3   86.76    6.52 
   8   0   3   92.42    6.33 
  -8   0  -3   94.14    6.01 
   9   0   3  150.57    9.52 
  -9   0  -3  150.10    9.19 
  -9   0  -3  155.63    9.08 
   9   0   3  173.70    9.66 
   9   0   3  153.07    9.10 
   9   0   3  151.63    9.85 
  -9   0  -3  162.00    9.71 
 -10   0  -3   14.48    3.95 
 -10   0  -3    9.42    2.72 
  10   0   3   12.16    3.86 
  10   0   3   17.82    3.47 
 -10   0  -3   15.34    2.89 
  10   0   3   13.92    4.05 
  10   0   3   11.75    2.73 
  11   0   3   10.90    3.18 
 -11   0  -3    3.50    4.75 
  11   0   3   10.20    3.96 
 -11   0  -3    8.03    3.12 
  11   0   3   10.55    4.57 
 -11  -1   3   32.61    4.45 
  11  -1  -3   41.80    5.33 
  11  -1  -3   31.77    5.43 
  11  -1  -3   37.47    4.80 
 -11   1   3   28.97    3.78 
  11   1  -3   26.85    3.86 
 -11   1   3   43.40    5.43 
  11   1  -3   27.98    4.74 
  10  -1  -3   31.61    4.24 
 -10  -1   3   29.41    3.58 
  10  -1  -3   30.93    3.70 
 -10  -1   3   28.38    3.68 
  10  -1  -3   31.94    4.54 
 -10  -1   3   29.70    3.16 
  10  -1  -3   28.65    3.75 
 -10   1   3   22.71    4.08 
  10   1  -3   25.58    3.83 
  10   1  -3   23.00    3.29 
 -10   1   3   21.54    2.85 
 -10   1   3   26.73    3.39 
  10   1  -3   22.69    3.27 
  10   1  -3   22.97    3.08 
   9  -1  -3   33.75    3.96 
   9  -1  -3   35.26    4.29 
  -9  -1   3   30.45    3.24 
   9  -1  -3   35.06    3.85 
   9  -1  -3   33.70    3.48 
  -9  -1   3   29.32    3.95 
  -9  -1   3   34.41    3.08 
   9  -1  -3   31.56    4.22 
   9   1  -3   42.83    3.87 
   9   1  -3   38.03    3.71 
  -9   1   3   39.49    3.87 
   9   1  -3   36.54    3.90 
  -9   1   3   38.30    3.41 
  -9   1   3   46.76    4.73 
   9   1  -3   40.85    3.53 
   8  -1  -3   23.84    3.29 
  -8  -1   3   18.87    2.28 
  -8  -1   3   22.79    2.96 
   8  -1  -3   19.97    2.78 
   8  -1  -3   19.07    2.52 
   8  -1  -3   20.27    2.49 
  -8  -1   3   21.65    2.23 
  -8   1   3   22.01    2.49 
   8   1  -3   25.17    2.53 
   8   1  -3   27.08    2.87 
  -8   1   3   20.62    2.82 
  -8   1   3   26.99    3.67 
   8   1  -3   23.15    2.57 
   8   1  -3   22.68    3.08 
   7  -1  -3  127.91    7.75 
   7  -1  -3  129.05    7.18 
   7  -1  -3  126.96    7.24 
  -7  -1   3  126.74    6.84 
   7  -1  -3  126.76    7.35 
  -7  -1   3  119.80    6.74 
  -7  -1   3  126.18    6.93 
   7  -1  -3  133.42    7.11 
  -7   1   3  127.83    7.48 
   7   1  -3  125.61    7.10 
   7   1  -3  126.23    6.90 
  -7   1   3  127.72    7.24 
   7   1  -3  130.45    7.09 
   7   1  -3  129.73    6.97 
  -7   1   3  124.78    7.18 
   7   1  -3  133.49    6.95 
  -6  -1   3   88.34    4.98 
  -6  -1   3   84.16    5.10 
   6  -1  -3   88.51    5.37 
   6  -1  -3   81.53    5.21 
   6  -1  -3   85.13    5.71 
   6  -1  -3   88.57    5.19 
   6  -1  -3   84.61    5.44 
  -6   1   3  100.19    5.37 
   6   1  -3   97.62    5.23 
   6   1  -3   90.52    5.10 
   6   1  -3   95.30    5.27 
   6   1  -3  101.13    5.09 
  -6   1   3   98.07    5.42 
   6   1  -3   97.66    5.08 
  -6   1   3   98.37    5.70 
  -6   1   3   99.47    5.32 
   5  -1  -3   49.30    3.12 
   5  -1  -3   50.30    3.13 
  -5  -1   3   49.28    2.69 
   5  -1  -3   50.41    3.22 
   5  -1  -3   49.93    2.96 
  -5  -1   3   47.96    2.76 
   5  -1  -3   48.90    3.59 
   5   1  -3   44.65    2.83 
   5   1  -3   42.76    2.95 
  -5   1   3   44.39    3.17 
   5   1  -3   41.67    2.63 
   5   1  -3   44.59    2.75 
  -5   1   3   43.16    2.91 
   5   1  -3   42.82    2.69 
  -5   1   3   44.73    2.94 
  -5   1   3   46.26    3.09 
  -5   1   3   48.13    3.34 
   4  -1  -3   21.49    1.77 
   4  -1  -3   23.29    1.73 
   4  -1  -3   21.13    1.57 
  -4  -1   3   22.59    1.29 
   4  -1  -3   21.83    1.81 
   4  -1  -3   22.29    2.06 
  -4   1   3   17.62    1.84 
  -4   1   3   15.21    1.52 
  -4   1   3   17.66    1.60 
   4   1  -3   17.33    1.29 
   4   1  -3   16.52    1.59 
   4   1  -3   17.60    1.28 
  -4   1   3   16.06    1.50 
  -4   1   3   19.65    1.81 
   3  -1  -3   92.40    4.87 
  -3  -1   3   88.96    4.58 
   3  -1  -3   91.45    5.04 
   3  -1  -3   95.88    4.97 
   3  -1  -3   94.89    4.99 
   3  -1  -3   94.52    5.18 
  -3  -1   3   96.45    4.61 
  -3  -1   3   91.87    4.49 
  -3   1   3   89.67    4.81 
  -3   1   3   98.28    5.02 
  -3   1   3   92.17    5.09 
   3   1  -3   90.45    4.61 
   3   1  -3   98.79    4.56 
  -3   1   3   92.28    4.99 
   3   1  -3   98.88    4.65 
  -3   1   3   93.24    5.05 
   2  -1  -3  418.84   18.72 
   2  -1  -3  393.83   18.61 
  -2  -1   3  407.31   18.23 
  -2  -1   3  434.84   18.22 
   2  -1  -3  362.68   19.11 
   2  -1  -3  404.61   18.85 
   2  -1  -3  415.06   19.10 
  -2   1   3  356.33   18.55 
  -2   1   3  381.67   19.09 
   2   1  -3  415.14   18.77 
  -2   1   3  374.62   18.69 
  -2   1   3  389.23   19.12 
  -2   1   3  376.51   18.75 
   2   1  -3  366.40   18.73 
   1  -1  -3  747.48   37.44 
  -1  -1   3  759.69   37.04 
   1  -1  -3  796.63   38.38 
  -1  -1   3  798.23   38.13 
   1  -1  -3  789.72   37.37 
   1  -1  -3  781.59   38.34 
   1  -1  -3  751.34   37.35 
  -1   1   3  833.00   37.37 
  -1   1   3  808.20   38.39 
   1   1  -3  790.82   37.06 
   1   1  -3  832.78   37.08 
  -1   1   3  813.98   37.38 
   1   1  -3  808.03   38.17 
  -1   1   3  818.33   37.51 
   1   1  -3  825.63   38.14 
  -1   1   3  825.42   38.36 
   0  -1   3    1.47    0.42 
   0  -1   3    1.59    0.37 
   0  -1  -3    1.29    0.41 
   0  -1  -3    1.73    0.37 
   0  -1   3    1.40    0.35 
   0  -1  -3    1.29    0.38 
   0  -1   3    1.52    0.21 
   0  -1  -3    1.96    0.57 
   0  -1   3    2.08    0.34 
   0  -1  -3    1.72    0.37 
   0   1  -3    2.81    0.40 
   0   1   3    1.98    0.37 
   0   1   3    2.77    0.46 
   0   1   3    2.22    0.49 
   0   1   3    3.11    0.54 
   0   1   3    3.19    0.64 
   0   1  -3    2.34    0.44 
   0   1  -3    2.50    0.28 
   0   1  -3    2.63    0.38 
  -1  -1  -3   46.15    2.95 
   1  -1   3   53.55    3.15 
  -1  -1  -3   49.76    3.00 
   1  -1   3   50.00    3.04 
  -1  -1  -3   47.31    3.00 
   1  -1   3   49.30    2.98 
  -1  -1  -3   50.24    2.97 
   1  -1   3   49.82    2.98 
  -1   1  -3   64.03    2.78 
   1   1   3   59.34    3.07 
  -1   1  -3   60.13    3.06 
  -1   1  -3   59.80    3.05 
   1   1   3   61.84    3.18 
  -1   1  -3   63.36    3.15 
   1   1   3   61.90    3.00 
   1   1   3   60.47    3.00 
  -2  -1  -3  811.69   39.35 
   2  -1   3  823.23   40.54 
  -2  -1  -3  847.48   40.41 
  -2  -1  -3  811.40   40.40 
  -2  -1  -3  813.26   39.30 
   2  -1   3  886.27   39.32 
   2  -1   3  842.30   39.60 
   2  -1   3  874.20   39.47 
   2  -1   3  830.62   40.46 
   2   1   3  831.26   39.44 
  -2   1  -3  848.34   40.50 
   2   1   3  844.40   40.46 
   2   1   3  823.65   40.37 
  -2   1  -3  859.41   39.29 
  -2   1  -3  864.12   39.54 
   3  -1   3  111.58    5.36 
   3  -1   3   99.58    5.50 
   3  -1   3  102.81    5.06 
  -3  -1  -3  102.13    5.18 
   3  -1   3  104.85    5.28 
   3  -1   3  111.85    5.49 
  -3  -1  -3  106.33    5.21 
  -3  -1  -3  108.59    5.20 
  -3  -1  -3  101.76    5.08 
   3   1   3   83.02    5.07 
  -3   1  -3   85.13    5.23 
  -3   1  -3   82.71    5.27 
   3   1   3   89.79    5.20 
   3   1   3   91.44    5.21 
  -3   1  -3   81.26    4.98 
  -4  -1  -3   20.41    1.77 
   4  -1   3   20.92    2.08 
   4  -1   3   19.95    2.39 
  -4  -1  -3   18.42    1.90 
   4  -1   3   21.13    1.86 
  -4  -1  -3   19.87    1.74 
   4  -1   3   20.07    1.81 
   4  -1   3   20.73    2.01 
  -4   1  -3   26.48    2.06 
   4   1   3   24.25    1.84 
  -4   1  -3   23.09    1.87 
  -4   1  -3   25.76    2.36 
   4   1   3   27.18    1.95 
   4   1   3   26.11    2.12 
  -5  -1  -3   14.54    1.64 
  -5  -1  -3   14.62    1.88 
   5  -1   3   14.51    2.12 
   5  -1   3   16.67    1.99 
  -5  -1  -3   14.09    1.67 
   5  -1   3   16.50    2.10 
   5  -1   3   15.61    1.77 
   5  -1   3   14.95    1.72 
  -5   1  -3   10.57    1.56 
   5   1   3   14.97    2.03 
   5   1   3   14.57    1.76 
   5   1   3   12.04    1.61 
  -5   1  -3   13.60    2.00 
  -5   1  -3   13.59    1.70 
   6  -1   3  102.75    6.43 
   6  -1   3  106.15    6.19 
   6  -1   3  105.39    6.40 
   6  -1   3  103.91    6.76 
   6  -1   3  104.94    6.13 
  -6  -1  -3  103.08    6.05 
  -6  -1  -3  106.00    6.21 
  -6  -1  -3   97.05    6.07 
   6   1   3  116.20    6.29 
   6   1   3  113.88    6.19 
  -6   1  -3  113.82    6.23 
   6   1   3  106.27    6.44 
  -6   1  -3  118.25    6.70 
   6   1   3  111.64    6.24 
  -6   1  -3  108.29    6.36 
   7  -1   3   94.37    6.66 
   7  -1   3   98.95    6.18 
  -7  -1  -3  105.87    6.19 
   7  -1   3  106.26    6.07 
   7  -1   3  104.10    6.42 
  -7  -1  -3   98.47    5.92 
  -7  -1  -3  100.27    5.90 
   7   1   3   95.26    5.97 
   7   1   3   92.78    6.31 
  -7   1  -3   94.87    6.48 
   7   1   3   92.28    5.93 
  -7   1  -3   96.47    5.92 
  -7   1  -3   93.35    6.10 
  -8  -1  -3   37.29    4.15 
   8  -1   3   30.47    4.14 
  -8  -1  -3   37.17    3.43 
  -8  -1  -3   35.95    3.53 
   8  -1   3   33.93    4.12 
   8  -1   3   37.16    3.78 
   8  -1   3   35.91    4.06 
  -8   1  -3   44.37    4.72 
  -8   1  -3   42.32    3.70 
   8   1   3   40.57    3.84 
  -8   1  -3   36.79    3.76 
   8   1   3   38.86    3.63 
   8   1   3   36.68    3.72 
   9  -1   3   29.00    3.94 
   9  -1   3   21.14    3.44 
  -9  -1  -3   29.76    3.71 
   9  -1   3   23.33    4.07 
   9  -1   3   20.95    3.46 
  -9  -1  -3   25.83    3.76 
  -9  -1  -3   27.12    3.49 
   9   1   3   29.20    3.79 
   9   1   3   39.96    5.22 
  -9   1  -3   25.00    4.21 
   9   1   3   32.83    3.62 
  -9   1  -3   27.00    3.87 
  -9   1  -3   26.63    3.29 
  10  -1   3   30.69    5.25 
  10  -1   3   31.91    4.01 
 -10  -1  -3   37.98    4.82 
  10  -1   3   30.92    4.61 
 -10  -1  -3   38.94    4.60 
 -10   1  -3   27.82    4.81 
  10   1   3   35.21    4.93 
  10   1   3   39.09    4.92 
  10   1   3   41.80    4.72 
 -10   1  -3   31.25    3.89 
 -10   1  -3   38.58    4.79 
  10   1   3   30.69    4.07 
  11  -1   3   22.24    5.91 
  11  -1   3   24.87    4.17 
 -11  -1  -3   15.17    3.65 
  11  -1   3   18.28    4.87 
  11   1   3   24.46    4.08 
  11   1   3   13.55    4.65 
 -11   1  -3   29.05    5.63 
 -11   1  -3   21.40    4.17 
 -11  -2   3   17.17    2.85 
  11  -2  -3   13.61    5.05 
  11  -2  -3   18.61    4.61 
  11  -2  -3   19.69    3.74 
  11   2  -3   23.36    4.26 
  11   2  -3   17.05    3.42 
 -11   2   3   14.95    3.21 
 -10  -2   3    9.14    2.94 
  10  -2  -3    6.25    3.13 
 -10  -2   3   12.15    2.07 
  10  -2  -3    3.04    3.79 
 -10  -2   3   10.34    2.69 
  10  -2  -3   13.17    2.92 
 -10  -2   3    7.66    2.01 
  10  -2  -3   12.67    3.57 
 -10   2   3   16.70    3.01 
  10   2  -3   10.78    3.15 
  10   2  -3   13.95    3.09 
  10   2  -3   13.73    2.77 
 -10   2   3   12.33    2.61 
 -10   2   3   11.96    4.08 
  10   2  -3   11.96    2.48 
   9  -2  -3  116.95    7.47 
  -9  -2   3  108.63    6.77 
   9  -2  -3  111.53    7.48 
  -9  -2   3  112.96    6.92 
   9  -2  -3  115.32    8.73 
   9  -2  -3  115.16    8.02 
  -9  -2   3  110.38    6.44 
  -9   2   3  107.59    8.18 
   9   2  -3  113.14    7.06 
   9   2  -3  115.41    7.03 
   9   2  -3  117.69    6.76 
  -9   2   3  117.66    7.35 
  -9   2   3  119.89    7.20 
   9   2  -3  105.85    7.16 
  -8  -2   3   78.89    5.14 
   8  -2  -3   82.87    5.71 
  -8  -2   3   76.93    4.79 
   8  -2  -3   80.74    6.10 
  -8  -2   3   75.66    4.78 
   8  -2  -3   81.89    5.72 
  -8  -2   3   78.01    5.06 
   8  -2  -3   82.65    6.79 
  -8   2   3   87.71    5.51 
   8   2  -3   89.90    5.34 
   8   2  -3   82.38    5.40 
  -8   2   3   90.69    5.73 
  -8   2   3   87.41    6.45 
   8   2  -3   86.38    5.43 
   8   2  -3   81.66    5.22 
   7  -2  -3   40.98    3.53 
  -7  -2   3   41.88    2.56 
   7  -2  -3   38.62    4.31 
   7  -2  -3   41.35    3.45 
   7  -2  -3   38.53    3.14 
  -7  -2   3   40.77    2.83 
   7  -2  -3   40.43    3.82 
  -7   2   3   30.97    3.07 
  -7   2   3   33.72    3.28 
   7   2  -3   31.62    3.02 
   7   2  -3   30.47    2.98 
  -7   2   3   30.69    4.09 
  -7   2   3   31.54    3.16 
   7   2  -3   31.48    2.53 
   7   2  -3   35.26    2.85 
   6  -2  -3    4.27    1.27 
  -6  -2   3    4.52    0.96 
  -6  -2   3    4.83    0.86 
   6  -2  -3    4.02    1.51 
   6  -2  -3    2.34    1.40 
  -6  -2   3    3.57    0.95 
   6  -2  -3    4.56    1.98 
   6  -2  -3    4.26    1.35 
  -6   2   3    5.54    1.18 
  -6   2   3    7.06    2.02 
   6   2  -3    7.27    1.25 
  -6   2   3    7.99    1.56 
   6   2  -3    6.57    1.11 
  -6   2   3    7.65    1.35 
  -6   2   3    5.29    1.54 
   6   2  -3    5.11    1.32 
   5  -2  -3   34.26    3.45 
   5  -2  -3   35.76    2.96 
  -5  -2   3   36.38    2.35 
   5  -2  -3   36.85    3.10 
   5  -2  -3   37.64    2.82 
   5  -2  -3   37.00    2.74 
  -5  -2   3   36.95    2.15 
   5   2  -3   34.29    2.13 
  -5   2   3   35.86    2.59 
  -5   2   3   35.53    2.81 
  -5   2   3   36.43    2.80 
  -5   2   3   37.60    3.13 
   5   2  -3   35.72    2.32 
  -5   2   3   38.80    3.25 
   5   2  -3   35.48    2.48 
   4  -2  -3   55.96    3.65 
   4  -2  -3   50.25    3.60 
  -4  -2   3   53.22    3.02 
   4  -2  -3   57.75    3.47 
  -4  -2   3   55.31    2.90 
   4  -2  -3   55.97    3.43 
   4  -2  -3   54.38    4.02 
  -4   2   3   52.29    3.51 
  -4   2   3   50.10    3.67 
   4   2  -3   56.84    3.16 
  -4   2   3   57.83    3.31 
   4   2  -3   53.15    2.90 
  -4   2   3   55.15    3.82 
  -4   2   3   56.69    3.58 
   4   2  -3   57.02    3.05 
   3  -2  -3    7.53    1.34 
   3  -2  -3    7.81    1.14 
   3  -2  -3    9.03    1.40 
   3  -2  -3    6.72    1.51 
   3   2  -3   11.76    0.98 
  -3   2   3   13.94    1.67 
   3   2  -3   12.09    0.84 
   3   2  -3   13.74    1.20 
  -3   2   3   12.73    1.64 
   3   2  -3   12.41    0.83 
  -3   2   3   11.19    1.40 
  -3   2   3   11.43    1.24 
  -3   2   3   10.89    1.36 
   2  -2  -3   31.35    2.16 
  -2  -2   3   33.28    1.85 
   2  -2  -3   33.57    2.73 
  -2  -2   3   32.37    1.96 
   2  -2  -3   32.76    2.35 
   2  -2  -3   31.77    2.36 
  -2   2   3   30.88    2.26 
  -2   2   3   33.12    2.49 
   2   2  -3   31.58    1.81 
   2   2  -3   31.54    1.90 
   2   2  -3   31.23    1.99 
  -2   2   3   31.73    2.08 
  -2   2   3   32.91    2.58 
   2   2  -3   33.51    1.89 
  -2   2   3   29.40    2.19 
   1  -2  -3  154.82    7.37 
  -1  -2   3  154.85    7.17 
   1  -2  -3  152.01    7.45 
   1  -2  -3  149.73    7.41 
   1  -2  -3  148.50    7.59 
   1  -2  -3  144.88    7.19 
  -1  -2   3  151.21    7.05 
  -1  -2   3  152.73    7.18 
  -1  -2   3  148.16    7.08 
   1   2  -3  134.08    7.07 
  -1   2   3  133.27    7.37 
   1   2  -3  131.22    7.00 
  -1   2   3  134.22    7.11 
  -1   2   3  134.10    7.31 
   1   2  -3  133.78    7.12 
  -1   2   3  130.38    7.30 
   1   2  -3  133.81    7.07 
  -1   2   3  132.12    7.47 
   0  -2  -3  479.86   23.34 
   0  -2  -3  520.30   23.71 
   0  -2   3  518.05   23.06 
   0  -2  -3  501.19   23.24 
   0  -2  -3  493.26   23.13 
   0  -2   3  517.74   23.21 
   0  -2   3  516.03   23.65 
   0  -2  -3  489.78   23.73 
   0  -2   3  515.47   23.56 
   0  -2   3  521.38   22.89 
   0   2  -3  472.74   23.57 
   0   2   3  458.80   23.63 
   0   2   3  476.14   23.75 
   0   2  -3  476.95   22.85 
   0   2   3  481.79   23.40 
   0   2   3  443.79   23.05 
   0   2   3  446.49   23.13 
   0   2  -3  471.70   23.58 
   0   2  -3  470.46   23.10 
   0   2  -3  454.68   23.03 
  -1  -2  -3   87.64    4.84 
   1  -2   3   87.73    4.92 
  -1  -2  -3   89.80    4.88 
   1  -2   3   87.54    5.12 
  -1  -2  -3   89.63    4.95 
   1  -2   3   88.97    4.57 
   1  -2   3   87.95    4.81 
   1  -2   3   89.08    4.86 
  -1  -2  -3   89.53    5.02 
   1   2   3   91.85    4.83 
   1   2   3   93.76    4.87 
   1   2   3   90.39    4.94 
   1   2   3   91.91    4.82 
  -1   2  -3   87.44    4.94 
  -1   2  -3   93.61    4.99 
   1   2   3   91.01    5.12 
  -1   2  -3   91.29    4.52 
  -1   2  -3   91.18    4.88 
  -1   2  -3   92.64    4.90 
   2  -2   3   85.70    5.30 
  -2  -2  -3   88.46    5.14 
  -2  -2  -3   87.07    5.19 
   2  -2   3   86.85    5.16 
  -2  -2  -3   87.22    5.16 
   2  -2   3   91.84    5.59 
   2  -2   3   86.19    4.88 
  -2  -2  -3   88.05    5.13 
   2  -2   3   86.29    5.20 
  -2   2  -3  107.11    5.48 
   2   2   3  104.06    5.11 
   2   2   3  107.42    5.14 
  -2   2  -3  104.07    5.35 
  -2   2  -3  105.93    4.89 
   2   2   3  103.58    5.46 
  -2   2  -3  101.61    5.45 
   2   2   3  103.52    5.27 
  -2   2  -3  107.25    5.32 
   3  -2   3   71.29    4.66 
  -3  -2  -3   72.76    4.37 
   3  -2   3   75.19    4.58 
   3  -2   3   75.93    4.49 
   3  -2   3   71.21    4.89 
  -3  -2  -3   73.08    4.42 
  -3  -2  -3   69.95    4.32 
   3  -2   3   71.72    4.21 
  -3  -2  -3   76.27    4.46 
  -3   2  -3   85.80    4.22 
  -3   2  -3   82.08    4.86 
   3   2   3   89.58    4.56 
   3   2   3   83.28    4.36 
   3   2   3   88.59    4.82 
  -3   2  -3   83.17    4.68 
  -3   2  -3   85.32    4.59 
   4  -2   3   73.65    4.57 
   4  -2   3   77.95    4.34 
  -4  -2  -3   80.12    4.42 
  -4  -2  -3   72.05    4.30 
   4  -2   3   73.72    4.77 
   4  -2   3   78.74    4.55 
  -4  -2  -3   75.88    4.39 
  -4  -2  -3   76.00    4.51 
   4  -2   3   72.93    5.08 
   4   2   3   73.11    4.27 
  -4   2  -3   73.01    4.91 
  -4   2  -3   74.29    4.69 
  -4   2  -3   76.89    4.19 
   4   2   3   76.40    4.73 
  -4   2  -3   75.45    4.57 
   5  -2   3   33.29    2.75 
  -5  -2  -3   34.89    2.79 
  -5  -2  -3   32.87    2.73 
   5  -2   3   36.77    3.11 
  -5  -2  -3   31.96    2.65 
   5  -2   3   32.29    3.16 
  -5  -2  -3   32.52    2.54 
   5  -2   3   29.76    3.63 
   5  -2   3   35.03    2.82 
   5   2   3   37.14    2.60 
  -5   2  -3   37.52    3.10 
   5   2   3   38.88    2.86 
  -5   2  -3   36.06    3.51 
   5   2   3   32.46    3.11 
  -6  -2  -3   21.71    2.56 
   6  -2   3   20.06    2.80 
   6  -2   3   17.07    2.90 
   6  -2   3   22.87    2.75 
  -6  -2  -3   19.77    2.36 
  -6  -2  -3   24.37    2.28 
   6  -2   3   22.54    2.64 
   6  -2   3   22.32    2.41 
  -6  -2  -3   19.55    2.37 
   6   2   3   20.17    2.64 
  -6   2  -3   22.54    2.51 
   6   2   3   22.03    2.29 
  -6   2  -3   24.09    2.60 
  -6   2  -3   24.42    2.81 
   6   2   3   19.01    2.58 
  -6   2  -3   20.90    2.87 
  -7  -2  -3   21.11    2.92 
   7  -2   3   20.40    2.78 
  -7  -2  -3   24.93    2.57 
   7  -2   3   18.62    2.51 
  -7  -2  -3   22.90    2.89 
   7  -2   3   21.12    3.62 
   7  -2   3   20.98    2.82 
  -7  -2  -3   26.30    3.18 
   7  -2   3   28.19    3.36 
   7   2   3   19.73    3.09 
   7   2   3   30.16    3.22 
  -7   2  -3   23.02    3.35 
  -7   2  -3   27.35    2.96 
   7   2   3   24.52    2.68 
   8  -2   3   95.25    6.49 
   8  -2   3  100.15    6.72 
  -8  -2  -3   98.96    6.27 
   8  -2   3   94.94    7.96 
  -8  -2  -3   86.45    6.58 
   8  -2   3  108.62    7.33 
  -8  -2  -3   89.27    6.44 
  -8  -2  -3   97.15    6.63 
   8  -2   3   97.15    6.87 
   8   2   3  106.89    7.68 
   8   2   3  104.68    6.68 
   8   2   3  105.90    6.92 
  -8   2  -3  104.74    6.89 
  -8   2  -3  112.32    6.75 
  -8   2  -3  116.64    7.75 
   9  -2   3   59.85    6.52 
   9  -2   3   76.18    6.78 
  -9  -2  -3   67.55    5.33 
   9  -2   3   77.23    7.44 
   9  -2   3   71.60    6.00 
  -9  -2  -3   69.17    5.81 
  -9  -2  -3   66.79    6.01 
   9   2   3   76.83    7.32 
   9   2   3   71.29    5.62 
  -9   2  -3   78.87    5.91 
  -9   2  -3   81.32    7.28 
   9   2   3   76.34    5.94 
  -9   2  -3   74.39    6.21 
  10  -2   3   25.67    4.78 
  10  -2   3   15.96    5.25 
 -10  -2  -3   22.55    4.20 
  10  -2   3   20.27    3.89 
  10  -2   3   25.78    4.87 
 -10  -2  -3   22.93    3.14 
 -10   2  -3   20.81    3.99 
 -10   2  -3   23.30    5.33 
  10   2   3   27.73    3.88 
  10   2   3   20.99    3.51 
  10  -3  -3   52.69    5.91 
 -10  -3   3   51.30    5.96 
  10  -3  -3   55.72    6.67 
  10  -3  -3   59.89    7.24 
  10  -3  -3   60.58    8.07 
 -10  -3   3   56.60    4.25 
  10   3  -3   49.04    5.47 
  10   3  -3   47.28    5.22 
 -10   3   3   56.83    6.04 
 -10   3   3   51.01    5.88 
 -10   3   3   42.79    6.41 
   9  -3  -3   11.79    4.09 
  -9  -3   3    3.77    1.97 
   9  -3  -3    6.18    2.91 
  -9  -3   3    5.80    1.54 
   9  -3  -3    9.56    3.07 
   9  -3  -3    6.22    2.72 
  -9  -3   3    5.66    1.49 
   9   3  -3    6.33    2.13 
   9   3  -3    8.12    2.36 
   9   3  -3    6.85    2.20 
  -9   3   3    4.32    2.16 
   9   3  -3    5.58    1.80 
  -9   3   3    7.41    3.61 
   9   3  -3    7.36    2.67 
  -8  -3   3   10.22    2.15 
  -8  -3   3   11.51    1.54 
   8  -3  -3   10.49    2.76 
   8  -3  -3   10.87    2.51 
   8  -3  -3   12.37    3.59 
   8  -3  -3   11.37    2.71 
  -8   3   3   18.34    3.58 
   8   3  -3   13.54    2.53 
   8   3  -3   12.20    2.31 
  -8   3   3   14.22    2.54 
   8   3  -3   11.20    2.03 
  -8   3   3   13.03    2.48 
  -8   3   3   14.90    2.60 
   7  -3  -3   70.74    5.64 
   7  -3  -3   70.44    5.20 
  -7  -3   3   76.29    4.60 
  -7  -3   3   76.72    4.11 
  -7  -3   3   75.97    4.24 
   7  -3  -3   78.48    5.58 
   7  -3  -3   78.25    6.40 
  -7   3   3   64.77    5.81 
   7   3  -3   65.78    4.40 
  -7   3   3   67.15    5.16 
  -7   3   3   62.82    4.74 
  -7   3   3   72.93    5.14 
   7   3  -3   62.12    4.75 
   7   3  -3   61.69    4.04 
  -6  -3   3   60.57    3.60 
   6  -3  -3   59.90    4.41 
   6  -3  -3   57.88    4.29 
   6  -3  -3   59.21    4.75 
  -6  -3   3   57.66    3.87 
   6  -3  -3   58.62    5.41 
  -6  -3   3   61.67    3.47 
   6  -3  -3   60.06    4.83 
   6   3  -3   62.37    3.79 
   6   3  -3   59.49    3.44 
  -6   3   3   62.19    4.53 
  -6   3   3   60.25    4.00 
   6   3  -3   64.29    4.17 
  -6   3   3   56.31    5.02 
  -6   3   3   60.93    4.49 
  -6   3   3   56.40    4.89 
   5  -3  -3   33.25    3.45 
   5  -3  -3   36.97    3.50 
  -5  -3   3   35.48    2.34 
  -5  -3   3   34.94    2.68 
   5  -3  -3   38.15    3.05 
  -5  -3   3   36.09    2.25 
   5  -3  -3   33.19    3.09 
   5  -3  -3   34.53    4.09 
   5   3  -3   35.07    2.82 
  -5   3   3   37.90    3.63 
  -5   3   3   36.58    3.81 
   5   3  -3   32.32    2.16 
  -5   3   3   37.81    3.18 
  -5   3   3   36.17    3.20 
  -5   3   3   36.70    2.74 
   4  -3  -3   37.67    3.97 
   4  -3  -3   41.65    3.11 
   4  -3  -3   40.74    3.09 
   4  -3  -3   38.23    3.40 
  -4  -3   3   40.96    2.79 
  -4  -3   3   40.15    2.57 
   4  -3  -3   39.10    3.40 
  -4  -3   3   42.73    2.50 
  -4   3   3   45.24    3.34 
   4   3  -3   44.96    2.72 
  -4   3   3   38.82    3.21 
  -4   3   3   44.08    3.74 
   4   3  -3   41.67    2.41 
   4   3  -3   44.61    3.06 
  -4   3   3   44.04    2.94 
   4   3  -3   44.50    2.49 
  -4   3   3   42.96    3.68 
   3  -3  -3   20.81    2.09 
   3  -3  -3   22.97    3.04 
  -3  -3   3   21.20    1.90 
   3  -3  -3   20.60    2.40 
   3  -3  -3   23.05    2.50 
   3  -3  -3   22.86    2.12 
  -3  -3   3   23.38    1.64 
  -3  -3   3   20.63    1.62 
  -3  -3   3   22.60    1.84 
  -3   3   3   22.81    2.29 
   3   3  -3   22.47    1.69 
   3   3  -3   20.90    2.10 
  -3   3   3   21.22    2.25 
  -3   3   3   21.07    2.61 
  -3   3   3   21.11    1.91 
   3   3  -3   19.72    1.52 
   3   3  -3   21.82    1.75 
  -3   3   3   23.46    2.69 
   2  -3  -3  192.40   10.34 
  -2  -3   3  195.92    9.82 
   2  -3  -3  196.99    9.99 
   2  -3  -3  197.29   10.23 
   2  -3  -3  193.35   10.27 
  -2  -3   3  195.22    9.88 
   2  -3  -3  190.62   10.64 
  -2  -3   3  189.49    9.84 
  -2  -3   3  185.83   10.00 
  -2   3   3  199.37   10.36 
   2   3  -3  196.46    9.92 
   2   3  -3  195.34    9.83 
  -2   3   3  204.08   10.36 
  -2   3   3  201.47    9.93 
   2   3  -3  200.58    9.77 
  -2   3   3  197.93   10.27 
   2   3  -3  205.52    9.98 
   1  -3  -3   51.67    3.24 
  -1  -3   3   52.17    2.96 
   1  -3  -3   47.12    3.06 
   1  -3  -3   47.85    3.12 
  -1  -3   3   48.06    2.81 
   1  -3  -3   51.95    3.79 
  -1  -3   3   52.57    3.38 
  -1  -3   3   51.41    3.01 
  -1   3   3   42.47    3.13 
  -1   3   3   41.55    3.03 
   1   3  -3   43.06    2.75 
   1   3  -3   42.07    2.77 
   1   3  -3   42.80    2.84 
  -1   3   3   42.65    2.89 
   1   3  -3   43.62    3.08 
  -1   3   3   45.28    3.52 
   1   3  -3   40.00    2.92 
  -1   3   3   39.55    3.22 
   0  -3  -3   23.97    2.08 
   0  -3   3   23.04    1.80 
   0  -3  -3   24.32    2.29 
   0  -3   3   22.53    1.97 
   0  -3   3   22.65    2.48 
   0  -3  -3   21.49    2.58 
   0  -3  -3   24.25    2.01 
   0  -3   3   20.94    1.93 
   0   3   3   21.32    1.92 
   0   3  -3   20.42    2.08 
   0   3   3   20.28    2.32 
   0   3  -3   19.06    1.60 
   0   3  -3   20.31    2.02 
   0   3  -3   21.99    1.84 
   0   3   3   23.00    2.18 
   0   3   3   22.03    2.02 
   0   3  -3   23.15    1.86 
  -1  -3  -3  126.92    6.18 
   1  -3   3  117.47    6.55 
   1  -3   3  124.93    5.85 
   1  -3   3  123.19    6.24 
   1  -3   3  124.95    6.22 
  -1  -3  -3  119.57    6.45 
   1  -3   3  122.37    6.09 
  -1  -3  -3  126.58    6.34 
  -1  -3  -3  124.75    6.20 
  -1   3  -3   97.82    6.13 
   1   3   3  104.83    6.44 
   1   3   3   97.63    5.91 
  -1   3  -3  103.54    5.67 
  -1   3  -3   98.26    6.04 
  -1   3  -3  104.13    6.24 
   1   3   3   93.82    5.99 
   1   3   3  101.80    6.13 
   1   3   3  100.68    5.98 
  -1   3  -3  102.08    6.05 
   2  -3   3  158.67    8.73 
   2  -3   3  158.70    8.31 
   2  -3   3  158.60    8.47 
  -2  -3  -3  159.78    8.23 
  -2  -3  -3  163.99    8.37 
   2  -3   3  165.68    8.30 
  -2  -3  -3  152.79    8.28 
   2  -3   3  158.56    7.90 
  -2  -3  -3  164.81    8.23 
  -2   3  -3  154.24    7.77 
   2   3   3  146.05    8.27 
  -2   3  -3  155.93    8.38 
  -2   3  -3  148.88    8.43 
   2   3   3  149.69    8.05 
   2   3   3  150.47    8.57 
  -2   3  -3  151.73    8.44 
  -2   3  -3  149.74    8.28 
   2   3   3  148.70    8.09 
   3  -3   3   55.89    4.47 
   3  -3   3   56.68    3.83 
  -3  -3  -3   54.83    3.43 
  -3  -3  -3   52.98    3.62 
   3  -3   3   52.19    3.33 
   3  -3   3   52.77    3.87 
  -3  -3  -3   52.51    3.46 
  -3  -3  -3   52.54    3.66 
   3  -3   3   53.06    3.57 
  -3   3  -3   53.75    3.75 
   3   3   3   53.13    3.35 
  -3   3  -3   50.00    3.55 
   3   3   3   53.46    3.58 
  -3   3  -3   53.71    3.15 
   3   3   3   51.38    3.32 
  -3   3  -3   52.68    4.03 
   3   3   3   54.48    4.03 
  -3   3  -3   54.82    4.05 
  -4  -3  -3   18.18    2.28 
  -4  -3  -3   14.62    1.98 
   4  -3   3   19.04    2.68 
  -4  -3  -3   17.51    2.18 
   4  -3   3   17.15    2.30 
   4  -3   3   18.06    2.21 
  -4  -3  -3   18.34    1.88 
   4  -3   3   18.87    2.01 
   4  -3   3   17.76    2.91 
  -4   3  -3   13.43    2.35 
  -4   3  -3   16.18    2.11 
   4   3   3   17.23    2.45 
  -4   3  -3   15.61    1.74 
   4   3   3   13.48    1.78 
   4   3   3   14.96    1.96 
  -4   3  -3   17.53    2.40 
   5  -3   3   73.72    5.63 
   5  -3   3   76.56    6.39 
   5  -3   3   81.77    5.07 
  -5  -3  -3   79.55    5.27 
  -5  -3  -3   77.00    4.86 
   5  -3   3   75.29    5.16 
   5  -3   3   76.24    5.43 
  -5  -3  -3   76.93    5.04 
  -5  -3  -3   82.30    5.13 
   5   3   3   86.85    5.28 
  -5   3  -3   88.69    6.08 
  -5   3  -3   86.25    5.56 
   5   3   3   95.22    5.98 
  -5   3  -3   85.87    5.38 
  -5   3  -3   89.06    4.87 
   5   3   3   87.44    4.91 
  -6  -3  -3    0.91    1.02 
   6  -3   3    1.92    1.32 
  -6  -3  -3    0.38    1.33 
   6  -3   3    1.73    1.54 
   6  -3   3    0.57    1.76 
  -6  -3  -3    0.90    1.36 
   6  -3   3    1.80    1.83 
   6  -3   3    0.37    2.61 
  -6  -3  -3    2.71    1.72 
  -6   3  -3    6.77    2.43 
   6   3   3    4.61    2.17 
   6   3   3    4.89    1.23 
   7  -3   3  108.15    7.27 
   7  -3   3  104.56    7.48 
  -7  -3  -3  105.73    6.72 
  -7  -3  -3  110.20    6.76 
   7  -3   3  106.73    7.17 
  -7  -3  -3  111.10    6.35 
   7   3   3  107.93    7.00 
  -7   3  -3  105.10    7.12 
   7   3   3   92.66    7.67 
   7   3   3  104.83    6.38 
  -7   3  -3  102.92    6.59 
  -8  -3  -3   22.73    3.04 
  -8  -3  -3   26.48    3.35 
   8  -3   3   13.85    3.21 
   8  -3   3   23.01    3.99 
  -8  -3  -3   27.46    3.30 
   8  -3   3   21.89    4.82 
   8  -3   3   25.98    3.55 
  -8   3  -3   23.97    4.40 
   8   3   3   15.99    3.97 
  -8   3  -3   22.88    3.55 
   8   3   3   22.22    2.74 
   9  -3   3    7.16    3.63 
   9  -3   3    7.60    4.24 
  -9  -3  -3    5.37    2.88 
   9  -3   3    9.88    3.30 
  -9  -3  -3    5.99    2.16 
   9   3   3    8.17    2.80 
  -9   3  -3   11.86    3.07 
  -9   3  -3   12.06    4.31 
  -9   3  -3    8.25    3.12 
  10  -3   3   33.66    5.39 
  10  -3   3   37.85    5.03 
  10  -3   3   38.56    6.77 
 -10  -3  -3   33.69    3.86 
 -10   3  -3   38.34    6.25 
  10   3   3   29.11    4.32 
 -10   3  -3   28.23    4.36 
  10  -4  -3   16.91    4.86 
  10  -4  -3   14.34    5.89 
 -10  -4   3   18.89    2.42 
  10  -4  -3   18.25    4.17 
  10   4  -3   18.40    3.77 
 -10   4   3   10.20    3.89 
  10   4  -3   13.22    3.26 
 -10   4   3    8.34    5.41 
   9  -4  -3   68.82    9.20 
   9  -4  -3   74.13    8.01 
  -9  -4   3   76.00    6.70 
   9  -4  -3   73.49    7.34 
   9  -4  -3   72.77    8.15 
  -9  -4   3   80.11    4.98 
  -9   4   3   84.14    6.91 
  -9   4   3   94.46    9.20 
   9   4  -3   78.94    6.59 
   8  -4  -3   41.32    5.14 
   8  -4  -3   36.22    5.47 
   8  -4  -3   33.13    4.62 
  -8  -4   3   34.86    3.53 
  -8  -4   3   35.95    4.40 
   8  -4  -3   36.18    4.70 
  -8  -4   3   39.11    3.18 
  -8   4   3   37.99    5.01 
  -8   4   3   44.19    5.85 
   8   4  -3   46.25    4.90 
  -8   4   3   40.87    4.88 
   8   4  -3   43.53    3.21 
   8   4  -3   39.13    4.12 
  -7  -4   3   53.37    3.99 
   7  -4  -3   60.86    4.93 
   7  -4  -3   50.03    5.63 
  -7  -4   3   50.49    3.55 
   7  -4  -3   48.83    6.62 
  -7  -4   3   57.66    3.50 
   7  -4  -3   58.42    5.12 
   7  -4  -3   50.97    5.54 
  -7  -4   3   50.80    4.40 
   7   4  -3   49.77    4.09 
  -7   4   3   46.07    5.90 
   7   4  -3   52.33    4.78 
  -7   4   3   63.30    4.66 
  -7   4   3   50.48    5.10 
  -7   4   3   49.31    4.91 
   7   4  -3   57.32    3.49 
   6  -4  -3   67.38    6.75 
   6  -4  -3   71.76    5.91 
   6  -4  -3   74.07    5.87 
   6  -4  -3   72.24    5.36 
  -6  -4   3   73.02    4.04 
  -6  -4   3   72.67    4.78 
  -6   4   3   66.28    5.25 
  -6   4   3   76.42    6.07 
  -6   4   3   64.57    4.72 
  -6   4   3   66.70    6.17 
  -6   4   3   67.70    5.42 
   6   4  -3   66.43    4.46 
   6   4  -3   66.43    4.03 
   6   4  -3   67.65    5.05 
  -5  -4   3   13.20    1.56 
   5  -4  -3   10.95    2.31 
   5  -4  -3    7.58    1.67 
  -5  -4   3   11.39    1.79 
   5  -4  -3   14.47    3.46 
   5  -4  -3   10.56    1.91 
   5  -4  -3    9.64    2.25 
  -5   4   3    4.68    1.72 
   5   4  -3    7.41    1.08 
  -5   4   3    7.55    1.56 
   5   4  -3    8.18    1.41 
  -5   4   3    7.73    2.51 
  -5   4   3    8.13    2.34 
  -5   4   3    6.67    1.86 
   5   4  -3    7.38    1.81 
  -4  -4   3   29.66    2.76 
   4  -4  -3   32.69    3.64 
  -4  -4   3   29.46    2.39 
   4  -4  -3   32.65    4.44 
  -4  -4   3   32.49    2.38 
   4  -4  -3   30.54    3.04 
   4  -4  -3   28.35    3.03 
   4  -4  -3   30.21    3.69 
  -4  -4   3   35.10    2.94 
  -4   4   3   31.16    3.37 
  -4   4   3   27.23    3.80 
  -4   4   3   34.11    3.32 
   4   4  -3   34.02    2.67 
  -4   4   3   31.29    3.97 
   4   4  -3   29.87    2.31 
   4   4  -3   32.76    3.09 
  -4   4   3   35.32    2.82 
   3  -4  -3   48.72    3.97 
   3  -4  -3   46.22    3.48 
   3  -4  -3   46.53    3.57 
  -3  -4   3   44.36    3.00 
   3  -4  -3   48.35    4.79 
  -3  -4   3   47.13    3.52 
  -3  -4   3   50.64    3.44 
   3  -4  -3   46.47    4.01 
  -3  -4   3   47.87    3.00 
  -3   4   3   44.14    4.26 
   3   4  -3   46.46    3.56 
   3   4  -3   44.59    2.95 
  -3   4   3   40.22    3.18 
  -3   4   3   40.22    3.59 
   3   4  -3   45.72    3.15 
  -3   4   3   41.87    4.11 
   3   4  -3   43.28    3.05 
  -3   4   3   40.70    3.67 
  -2  -4   3   34.05    3.04 
  -2  -4   3   36.56    3.45 
  -2  -4   3   35.66    2.80 
  -2  -4   3   35.22    2.77 
   2  -4  -3   34.61    3.96 
   2  -4  -3   36.15    3.41 
   2  -4  -3   34.16    3.15 
   2  -4  -3   40.77    3.68 
   2   4  -3   43.08    2.96 
  -2   4   3   42.81    3.99 
  -2   4   3   38.79    3.63 
  -2   4   3   44.67    3.11 
   2   4  -3   45.59    2.99 
   2   4  -3   45.39    3.14 
  -2   4   3   43.41    3.33 
   2   4  -3   44.38    2.86 
  -2   4   3   43.77    3.43 
   2   4  -3   45.86    3.36 
  -1  -4   3   99.07    5.72 
  -1  -4   3   97.59    5.03 
   1  -4  -3  100.52    6.22 
   1  -4  -3   98.31    5.32 
  -1  -4   3  100.18    5.27 
  -1  -4   3   99.33    5.15 
   1  -4  -3   97.39    5.33 
   1  -4  -3   99.69    5.53 
   1   4  -3   76.32    4.99 
   1   4  -3   76.09    4.89 
   1   4  -3   74.36    4.76 
  -1   4   3   73.67    5.22 
   1   4  -3   72.73    5.00 
  -1   4   3   78.55    5.21 
  -1   4   3   72.04    5.34 
   1   4  -3   77.12    5.31 
  -1   4   3   76.07    4.92 
  -1   4   3   72.37    5.66 
   0  -4  -3  244.97   12.33 
   0  -4   3  225.34   12.37 
   0  -4   3  222.90   11.92 
   0  -4   3  239.42   12.13 
   0  -4  -3  241.37   12.28 
   0  -4  -3  234.17   12.16 
   0  -4   3  240.14   12.00 
   0  -4  -3  237.35   12.56 
   0   4  -3  227.12   11.55 
   0   4  -3  228.88   12.05 
   0   4  -3  232.84   12.17 
   0   4   3  240.92   12.13 
   0   4  -3  229.94   12.01 
   0   4   3  227.42   12.27 
   0   4   3  231.74   12.53 
   0   4   3  230.76   11.83 
   0   4  -3  224.28   12.01 
   0   4   3  226.53   12.13 
   1  -4   3  127.95    6.97 
   1  -4   3  127.12    6.71 
  -1  -4  -3  122.22    7.45 
  -1  -4  -3  120.60    7.02 
   1  -4   3  132.22    7.14 
   1  -4   3  133.18    7.74 
   1  -4   3  125.98    7.22 
  -1  -4  -3  133.12    7.34 
  -1  -4  -3  132.74    7.11 
   1   4   3  119.26    6.89 
   1   4   3  126.00    7.62 
   1   4   3  121.94    7.05 
  -1   4  -3  124.06    7.04 
   1   4   3  123.11    7.14 
  -1   4  -3  122.01    7.02 
  -1   4  -3  108.63    7.13 
  -1   4  -3  124.97    7.39 
  -1   4  -3  124.93    6.57 
   1   4   3  118.67    6.90 
  -2  -4  -3   23.59    2.51 
   2  -4   3   23.27    2.84 
   2  -4   3   24.22    3.24 
   2  -4   3   23.79    2.54 
  -2  -4  -3   24.39    3.14 
  -2  -4  -3   23.34    2.42 
   2  -4   3   23.30    2.33 
   2  -4   3   22.40    2.73 
  -2  -4  -3   26.05    2.91 
   2   4   3   28.88    2.63 
   2   4   3   26.19    2.58 
   2   4   3   27.16    2.68 
  -2   4  -3   29.84    3.28 
   2   4   3   25.97    2.39 
  -2   4  -3   30.71    2.24 
  -2   4  -3   25.35    2.55 
  -2   4  -3   23.56    2.90 
   2   4   3   24.50    3.33 
  -2   4  -3   29.43    2.86 
   3  -4   3   59.19    5.32 
  -3  -4  -3   63.93    4.31 
   3  -4   3   59.06    3.71 
   3  -4   3   59.83    4.23 
  -3  -4  -3   60.70    3.91 
   3  -4   3   61.34    4.37 
   3  -4   3   61.84    4.06 
  -3  -4  -3   63.42    4.29 
  -3  -4  -3   58.59    3.79 
   3   4   3   47.08    3.55 
   3   4   3   44.98    3.77 
  -3   4  -3   45.70    4.02 
   3   4   3   48.65    3.82 
   3   4   3   53.06    4.68 
  -3   4  -3   46.90    4.39 
   3   4   3   44.09    3.50 
  -3   4  -3   47.45    3.35 
  -3   4  -3   45.07    4.42 
  -3   4  -3   44.90    3.77 
   4  -4   3   18.29    3.43 
   4  -4   3    9.96    2.21 
   4  -4   3   16.43    2.12 
  -4  -4  -3   15.53    2.21 
  -4  -4  -3   17.79    2.53 
   4  -4   3   21.79    2.95 
   4  -4   3   20.11    2.50 
  -4  -4  -3   16.46    2.20 
  -4  -4  -3   17.37    2.16 
   4   4   3   18.90    2.11 
  -4   4  -3   18.51    3.00 
  -4   4  -3   19.11    2.11 
   4   4   3   22.40    3.21 
  -4   4  -3   19.28    2.73 
  -4   4  -3   20.15    2.68 
   4   4   3   18.94    2.65 
   4   4   3   18.00    2.25 
  -4   4  -3   13.05    2.55 
   5  -4   3    7.76    3.01 
  -5  -4  -3    6.14    1.69 
   5  -4   3    6.58    2.34 
   5  -4   3    6.60    2.17 
  -5  -4  -3    8.10    1.86 
  -5  -4  -3    7.20    2.28 
   5  -4   3    7.26    1.80 
   5  -4   3    6.95    1.78 
  -5  -4  -3    8.11    1.57 
  -5   4  -3    5.67    2.23 
   5   4   3    5.34    1.37 
   5   4   3    6.72    1.72 
   5   4   3    7.92    2.59 
  -5   4  -3    6.90    1.56 
  -5   4  -3    4.89    1.61 
  -6  -4  -3  109.57    6.67 
   6  -4   3  104.72    7.53 
   6  -4   3   97.17    6.92 
  -6  -4  -3  104.84    6.18 
  -6  -4  -3   97.77    6.58 
   6  -4   3  102.44    8.66 
   6  -4   3  109.09    6.73 
   6   4   3  103.87    7.71 
  -6   4  -3  103.53    7.25 
  -6   4  -3  103.05    7.90 
   6   4   3  100.08    6.16 
   6   4   3  102.50    6.84 
  -6   4  -3   96.93    6.19 
  -7  -4  -3   10.64    2.48 
  -7  -4  -3   14.09    2.73 
   7  -4   3   16.14    3.88 
   7  -4   3   13.85    2.98 
   7  -4   3   15.67    2.96 
   7  -4   3   12.58    3.51 
  -7  -4  -3   13.36    2.18 
  -7  -4  -3   13.86    3.25 
   7  -4   3   11.14    4.04 
  -7   4  -3   12.89    3.28 
   7   4   3   14.32    2.29 
  -7   4  -3   14.67    3.15 
   7   4   3   18.88    4.26 
  -7   4  -3   12.52    2.42 
  -8  -4  -3   33.61    3.85 
   8  -4   3   34.99    5.31 
  -8  -4  -3   31.87    4.03 
   8  -4   3   28.43    6.10 
   8  -4   3   29.99    4.19 
   8   4   3   30.09    5.71 
  -8   4  -3   40.64    5.87 
   8   4   3   41.11    4.31 
  -8   4  -3   42.44    5.71 
  -9  -4  -3   66.04    5.72 
   9  -4   3   68.38    8.61 
   9  -4   3   85.96   10.50 
   9  -4   3   68.13    7.60 
  -9   4  -3   69.08    9.44 
  -9   4  -3   74.13    7.71 
  -9  -5   3    5.89    1.93 
   9  -5  -3   10.06    6.60 
   9  -5  -3    9.29    5.63 
   9  -5  -3   16.35    4.70 
  -9   5   3   -0.77    5.26 
  -9   5   3    0.88    3.65 
  -8  -5   3    3.93    1.58 
   8  -5  -3    1.18    5.15 
   8  -5  -3    1.96    3.40 
   8  -5  -3    4.77    4.23 
  -8  -5   3    2.27    3.21 
  -8   5   3   -1.80    2.63 
  -8   5   3   -1.54    4.27 
  -7  -5   3   31.16    3.21 
   7  -5  -3   34.45    5.64 
   7  -5  -3   41.56    4.75 
   7  -5  -3   31.66    4.66 
  -7  -5   3   33.47    3.03 
   7   5  -3   30.67    4.11 
  -7   5   3   36.70    4.44 
  -7   5   3   28.58    4.97 
   7   5  -3   35.54    3.07 
   7   5  -3   33.80    4.00 
  -7   5   3   42.37    5.78 
   6  -5  -3   33.83    4.61 
  -6  -5   3   28.96    3.46 
   6  -5  -3   31.78    5.52 
   6  -5  -3   34.46    4.64 
   6  -5  -3   33.18    3.97 
   6  -5  -3   30.04    3.76 
  -6  -5   3   37.13    4.36 
   6   5  -3   28.97    3.08 
   6   5  -3   33.33    3.74 
  -6   5   3   31.77    4.08 
   6   5  -3   32.31    4.35 
  -6   5   3   28.35    3.52 
  -6   5   3   35.20    4.82 
   5  -5  -3   46.67    4.37 
   5  -5  -3   44.13    5.19 
  -5  -5   3   40.14    3.63 
  -5  -5   3   43.77    4.39 
   5  -5  -3   42.26    5.21 
  -5  -5   3   39.41    3.31 
  -5  -5   3   44.28    3.21 
   5  -5  -3   49.70    6.62 
   5   5  -3   40.79    2.99 
  -5   5   3   44.49    5.93 
   5   5  -3   46.57    4.43 
   5   5  -3   43.13    3.82 
  -5   5   3   32.80    4.62 
  -5   5   3   43.70    4.08 
   5   5  -3   43.12    3.21 
  -5   5   3   44.35    4.65 
  -4  -5   3   42.37    3.14 
  -4  -5   3   42.23    3.27 
  -4  -5   3   42.39    3.84 
   4  -5  -3   40.46    4.75 
   4  -5  -3   45.05    4.21 
   4  -5  -3   43.41    3.88 
  -4  -5   3   43.61    3.96 
   4  -5  -3   33.06    4.75 
  -4   5   3   38.88    4.47 
   4   5  -3   37.96    3.04 
   4   5  -3   41.27    4.27 
  -4   5   3   31.82    3.44 
   4   5  -3   33.99    3.75 
   4   5  -3   36.43    3.04 
   4   5  -3   40.61    3.57 
  -4   5   3   36.17    4.49 
  -4   5   3   32.79    4.46 
  -4   5   3   36.38    4.20 
   3  -5  -3   67.41    5.39 
  -3  -5   3   64.74    4.99 
   3  -5  -3   66.20    5.55 
   3  -5  -3   63.86    5.17 
  -3  -5   3   71.83    5.18 
  -3  -5   3   64.30    4.48 
   3  -5  -3   63.44    5.02 
  -3  -5   3   66.88    4.46 
   3  -5  -3   66.05    6.48 
  -3   5   3   65.82    5.31 
   3   5  -3   73.96    5.35 
   3   5  -3   73.38    4.82 
  -3   5   3   69.35    5.26 
  -3   5   3   71.21    5.95 
  -3   5   3   68.02    4.72 
  -3   5   3   67.09    6.00 
   3   5  -3   78.36    4.77 
   3   5  -3   70.37    4.42 
   3   5  -3   73.87    4.58 
  -2  -5   3   51.21    3.87 
   2  -5  -3   56.76    4.62 
   2  -5  -3   56.46    5.74 
   2  -5  -3   52.45    4.46 
   2  -5  -3   50.82    4.78 
  -2  -5   3   48.45    3.80 
  -2  -5   3   49.71    4.29 
  -2  -5   3   51.56    4.78 
   2  -5  -3   54.72    4.30 
  -2   5   3   53.36    4.10 
   2   5  -3   57.90    3.89 
  -2   5   3   53.34    4.62 
  -2   5   3   56.79    5.51 
   2   5  -3   52.08    4.62 
   2   5  -3   57.23    4.15 
   2   5  -3   55.85    3.96 
  -2   5   3   51.21    4.71 
  -2   5   3   57.73    4.49 
   2   5  -3   53.72    4.12 
  -1  -5   3    3.26    1.39 
   1  -5  -3    4.52    1.70 
   1  -5  -3    4.40    1.76 
  -1  -5   3    2.76    1.41 
  -1  -5   3    3.20    2.28 
  -1  -5   3    3.67    1.73 
   1  -5  -3    3.23    2.73 
   1  -5  -3    3.59    2.01 
  -1   5   3    2.18    1.44 
  -1   5   3    0.14    1.30 
   1   5  -3    2.62    1.39 
   1   5  -3    2.88    1.58 
  -1   5   3    5.29    2.25 
  -1   5   3    5.10    1.63 
   1   5  -3    1.92    1.41 
   1   5  -3    3.54    1.94 
   1   5  -3    2.35    1.23 
  -1   5   3    2.88    1.77 
   0  -5  -3   31.74    4.34 
   0  -5   3   28.20    3.32 
   0  -5   3   25.96    2.87 
   0  -5   3   25.86    3.03 
   0  -5  -3   26.11    3.06 
   0  -5   3   28.69    3.69 
   0  -5  -3   24.32    3.14 
   0   5  -3   28.07    3.06 
   0   5  -3   28.02    2.98 
   0   5   3   31.69    3.51 
   0   5  -3   24.99    3.22 
   0   5   3   24.46    2.91 
   0   5  -3   30.27    3.86 
   0   5   3   25.65    3.12 
   0   5  -3   28.58    2.71 
   0   5   3   36.25    4.26 
  -1  -5  -3   54.79    4.40 
  -1  -5  -3   59.64    4.69 
   1  -5   3   57.99    4.62 
   1  -5   3   59.20    4.42 
   1  -5   3   68.35    5.98 
  -1  -5  -3   63.04    5.57 
   1  -5   3   61.78    4.75 
   1   5   3   58.43    4.38 
  -1   5  -3   61.17    4.91 
   1   5   3   64.67    5.59 
   1   5   3   68.97    4.80 
   1   5   3   70.02    4.65 
  -1   5  -3   61.35    4.60 
  -1   5  -3   66.92    5.41 
  -1   5  -3   67.75    4.16 
   2  -5   3   27.52    3.00 
  -2  -5  -3   30.39    3.20 
  -2  -5  -3   33.61    3.84 
  -2  -5  -3   29.71    3.24 
   2  -5   3   26.17    4.14 
   2  -5   3   32.40    3.31 
  -2  -5  -3   37.14    4.18 
  -2   5  -3   24.42    2.74 
  -2   5  -3   23.73    3.45 
   2   5   3   23.03    2.87 
   2   5   3   21.73    2.95 
   2   5   3   26.05    3.27 
  -2   5  -3   25.91    3.23 
   3  -5   3   13.28    3.53 
  -3  -5  -3   16.32    2.91 
   3  -5   3   15.37    2.77 
   3  -5   3   20.55    2.85 
  -3  -5  -3   20.72    2.71 
   3  -5   3   15.03    2.32 
  -3  -5  -3   16.19    2.29 
  -3   5  -3   30.12    4.05 
   3   5   3   24.58    3.34 
   3   5   3   25.65    3.11 
  -3   5  -3   29.23    3.65 
  -3   5  -3   21.13    3.36 
   3   5   3   29.24    3.95 
   3   5   3   20.45    2.69 
   3   5   3   23.45    2.78 
   4  -5   3  134.04    8.33 
  -4  -5  -3  125.05    7.67 
   4  -5   3  123.05    9.48 
   4  -5   3  125.50    7.43 
  -4  -5  -3  130.29    7.86 
   4  -5   3  123.46    7.90 
   4  -5   3  124.71    8.29 
  -4  -5  -3  128.24    7.36 
  -4   5  -3  123.92    8.18 
  -4   5  -3  125.09    7.06 
   4   5   3  122.20    8.68 
   4   5   3  122.51    7.16 
   4   5   3  122.38    7.88 
  -4   5  -3  126.96    8.63 
  -4   5  -3  128.13    8.77 
   4   5   3  125.69    7.94 
   4   5   3  118.51    7.26 
   5  -5   3   23.39    3.58 
  -5  -5  -3   20.97    3.70 
  -5  -5  -3   26.77    3.14 
   5  -5   3   22.47    4.81 
  -5  -5  -3   22.31    3.02 
   5  -5   3   23.36    3.23 
  -5  -5  -3   23.85    3.23 
   5  -5   3   24.40    3.52 
   5   5   3   31.03    3.26 
   5   5   3   35.55    4.50 
  -5   5  -3   32.47    3.85 
  -5   5  -3   31.25    3.46 
  -5   5  -3   21.95    3.90 
  -5   5  -3   27.35    3.70 
   5   5   3   30.33    4.15 
  -6  -5  -3   18.33    2.50 
   6  -5   3   19.75    3.22 
   6  -5   3   25.47    4.17 
   6  -5   3   16.49    2.98 
   6  -5   3   26.49    5.36 
  -6  -5  -3   19.16    2.97 
  -6  -5  -3   23.01    3.34 
  -6   5  -3   19.56    2.90 
  -6   5  -3   17.41    4.40 
  -6   5  -3   18.50    3.48 
   6   5   3   17.38    2.42 
   6   5   3   22.16    4.76 
  -7  -5  -3   59.51    5.79 
   7  -5   3   41.28    5.61 
  -7  -5  -3   48.84    4.62 
   7  -5   3   51.02    6.03 
   7  -5   3   51.18    7.47 
  -7   5  -3   53.61    6.65 
  -7   5  -3   62.05    6.76 
   7   5   3   56.18    4.85 
   8  -5   3    5.37    3.70 
  -8  -5  -3    0.60    2.22 
   8  -5   3    5.03    4.16 
   8  -5   3   11.68    6.06 
  -8   5  -3   10.32    5.21 
  -8   5  -3    2.47    3.52 
   7  -6  -3    1.35    6.11 
   7  -6  -3    2.23    4.08 
  -7  -6   3    0.44    1.69 
   7  -6  -3   -2.08    3.44 
  -7   6   3    5.86    4.93 
  -7   6   3    4.64    3.45 
   6  -6  -3   29.72    6.81 
   6  -6  -3   41.07    5.43 
   6  -6  -3   47.37    5.61 
  -6  -6   3   36.29    3.67 
  -6   6   3   42.39    6.12 
  -6   6   3   39.59    5.11 
   5  -6  -3   13.30    5.13 
  -5  -6   3   17.21    3.02 
   5  -6  -3   14.67    3.49 
  -5  -6   3   12.66    2.32 
   5  -6  -3   10.35    2.84 
  -5  -6   3   13.72    3.40 
  -5  -6   3   14.41    2.11 
   5   6  -3   12.27    2.17 
   5   6  -3   10.81    3.35 
   5   6  -3   12.37    2.00 
  -5   6   3   13.24    3.58 
  -5   6   3   12.28    3.80 
   4  -6  -3   -1.84    3.62 
  -4  -6   3   -0.31    1.80 
  -4  -6   3   -0.24    1.54 
   4  -6  -3   -1.24    2.47 
   4  -6  -3   -1.33    2.40 
   4  -6  -3   -0.88    2.27 
  -4  -6   3    0.22    2.56 
  -4  -6   3    2.01    2.86 
  -4   6   3   -2.70    4.10 
  -4   6   3    1.14    2.36 
  -4   6   3    0.12    2.89 
   4   6  -3    3.33    2.93 
   4   6  -3    3.07    2.38 
   4   6  -3    1.09    2.39 
   4   6  -3    0.19    1.67 
   4   6  -3    1.97    1.66 
  -3  -6   3   43.25    5.23 
   3  -6  -3   35.91    5.35 
   3  -6  -3   44.39    4.89 
  -3  -6   3   45.39    4.10 
   3  -6  -3   47.90    5.35 
  -3  -6   3   36.08    4.13 
  -3  -6   3   44.32    5.37 
  -3   6   3   52.48    4.78 
  -3   6   3   64.86    5.55 
   3   6  -3   51.96    4.16 
  -3   6   3   63.17    7.51 
  -3   6   3   51.13    5.74 
   3   6  -3   58.85    5.04 
   3   6  -3   48.44    5.61 
   3   6  -3   49.80    4.80 
   3   6  -3   52.75    4.49 
  -2  -6   3    6.09    3.02 
  -2  -6   3    5.07    2.57 
  -2  -6   3    6.00    1.80 
  -2  -6   3    5.01    1.98 
   2  -6  -3    4.55    4.06 
   2  -6  -3    2.83    2.90 
   2  -6  -3    7.85    2.74 
   2  -6  -3    3.66    2.15 
   2   6  -3    4.05    2.26 
  -2   6   3    2.07    2.61 
   2   6  -3    4.58    2.06 
  -2   6   3    5.16    2.00 
   2   6  -3    4.94    1.81 
   2   6  -3    7.42    3.03 
  -2   6   3    2.25    2.42 
  -2   6   3    6.53    3.79 
   2   6  -3    3.99    2.23 
  -2   6   3    5.15    2.53 
  -1  -6   3   26.74    3.69 
   1  -6  -3   33.07    3.92 
  -1  -6   3   33.22    4.61 
   1  -6  -3   28.79    4.17 
   1  -6  -3   34.39    5.20 
  -1  -6   3   35.69    3.81 
  -1  -6   3   34.34    4.01 
  -1   6   3   30.88    4.10 
   1   6  -3   33.78    3.79 
   1   6  -3   38.05    3.86 
  -1   6   3   32.68    4.54 
  -1   6   3   38.74    5.08 
   1   6  -3   29.35    4.18 
  -1   6   3   36.19    4.30 
   1   6  -3   31.98    3.79 
   1   6  -3   36.14    3.94 
  -1   6   3   29.44    3.97 
   0  -6   3   58.57    5.35 
   0  -6   3   59.14    4.82 
   0  -6   3   54.29    6.25 
   0  -6  -3   56.84    5.25 
   0  -6   3   62.34    4.97 
   0  -6  -3   60.47    4.97 
   0  -6  -3   58.26    6.49 
   0   6  -3   53.51    4.97 
   0   6   3   49.44    4.75 
   0   6  -3   54.33    4.82 
   0   6  -3   56.90    5.16 
   0   6   3   54.31    6.78 
   0   6   3   54.98    5.47 
   0   6  -3   59.33    6.01 
   0   6  -3   48.37    4.45 
   0   6   3   52.68    4.86 
   1  -6   3   34.95    4.50 
   1  -6   3   34.22    4.01 
   1  -6   3   24.90    4.49 
  -1  -6  -3   34.40    4.68 
  -1  -6  -3   36.66    4.76 
   1  -6   3   30.20    3.94 
  -1  -6  -3   32.74    4.25 
  -1  -6  -3   33.81    3.84 
  -1   6  -3   27.32    3.39 
  -1   6  -3   19.48    3.96 
   1   6   3   22.78    3.10 
   1   6   3   19.77    2.73 
   1   6   3   16.46    4.04 
  -1   6  -3   20.97    3.04 
   1   6   3   16.68    3.14 
  -1   6  -3   23.61    3.67 
  -2  -6  -3    2.92    2.25 
  -2  -6  -3    6.85    3.05 
  -2  -6  -3    3.93    1.94 
   2  -6   3    3.49    3.80 
   2  -6   3    5.67    2.50 
   2  -6   3    2.99    2.17 
  -2   6  -3    7.44    2.07 
   2   6   3    9.68    2.30 
  -2   6  -3    9.71    2.56 
   2   6   3    9.84    2.63 
   2   6   3    5.12    3.39 
  -2   6  -3    8.68    3.55 
   2   6   3   10.76    2.43 
  -2   6  -3    9.38    3.09 
  -3  -6  -3   72.64    6.26 
   3  -6   3   72.45    6.25 
  -3  -6  -3   71.48    5.42 
   3  -6   3   72.64    6.35 
  -3  -6  -3   67.97    6.46 
  -3   6  -3   67.81    5.17 
  -3   6  -3   66.07    6.38 
  -3   6  -3   71.42    7.56 
   3   6   3   73.49    5.43 
   3   6   3   68.47    5.29 
   3   6   3   69.21    7.81 
  -3   6  -3   67.08    6.22 
  -4  -6  -3   -0.36    2.87 
   4  -6   3    0.99    2.74 
  -4  -6  -3    0.82    1.87 
  -4  -6  -3    2.10    2.64 
   4  -6   3    3.71    4.62 
   4  -6   3    0.83    2.21 
   4   6   3    2.13    1.86 
   4   6   3   -0.22    1.83 
  -4   6  -3   -0.37    1.84 
  -4   6  -3   -0.76    2.44 
  -4   6  -3    3.16    4.12 
  -4   6  -3    0.90    3.16 
   4   6   3   -2.65    3.89 
   5  -6   3   23.81    6.38 
   5  -6   3   18.65    3.39 
   5  -6   3   20.43    4.30 
  -5  -6  -3   17.42    3.43 
  -5  -6  -3   22.31    3.03 
  -5   6  -3   16.70    2.91 
   5   6   3   18.27    2.84 
   5   6   3   16.74    2.50 
   5   6   3   19.94    5.35 
  -5   6  -3   12.74    3.50 
  -5   6  -3   17.51    4.56 
  -6  -6  -3   18.87    2.84 
   6  -6   3   19.51    6.81 
   6  -6   3   21.12    5.22 
  -6  -6  -3   17.95    3.91 
   6  -6   3   19.43    3.79 
  -6   6  -3   11.96    5.11 
   6   6   3   11.55    2.99 
  -6   6  -3   10.76    4.24 
   7  -6   3   12.99    6.99 
   7  -6   3   22.68    4.45 
   7  -6   3   16.87    5.22 
  -7  -6  -3   18.45    3.15 
  -7   6  -3   26.39    6.59 
  -7   6  -3   19.02    4.91 
  -5  -7   3   18.84    3.02 
   5  -7  -3   15.00    4.43 
   5  -7  -3   18.26    3.94 
   5  -7  -3   24.47    7.46 
  -5   7   3   27.28    5.11 
  -5   7   3   21.21    5.80 
   5   7  -3   17.16    2.91 
  -4  -7   3   54.67    5.36 
   4  -7  -3   42.11    7.56 
   4  -7  -3   53.82    7.27 
   4  -7  -3   51.32    6.90 
  -4   7   3   65.59    7.59 
   4   7  -3   67.01    5.39 
  -4   7   3   65.03    8.66 
   3  -7  -3   16.79    3.51 
  -3  -7   3   18.38    4.50 
  -3  -7   3   10.92    2.80 
   3  -7  -3    6.55    6.18 
  -3   7   3   11.67    4.28 
   3   7  -3   13.06    2.93 
   3   7  -3   12.72    3.16 
  -3   7   3   14.06    3.89 
  -2  -7   3    7.26    4.48 
  -2  -7   3    3.51    2.48 
   2  -7  -3    1.22    4.53 
   2  -7  -3    4.67    3.73 
   2  -7  -3   -0.84    2.81 
   2   7  -3    0.27    2.75 
  -2   7   3    0.97    3.34 
   2   7  -3    3.08    2.56 
  -2   7   3    0.04    3.09 
  -1  -7   3    8.09    4.44 
   1  -7  -3    9.59    4.96 
  -1  -7   3    7.44    2.63 
   1  -7  -3   10.20    2.84 
  -1   7   3    5.57    3.42 
   1   7  -3    7.92    3.02 
  -1   7   3    1.32    5.21 
  -1   7   3    3.70    3.03 
   1   7  -3    4.40    4.47 
   1   7  -3    7.61    3.25 
   1   7  -3    8.44    2.84 
   0  -7   3    9.67    3.15 
   0  -7  -3   12.62    5.13 
   0  -7   3   10.37    3.08 
   0  -7  -3   15.85    3.22 
   0  -7   3    8.52    5.07 
   0  -7  -3    9.50    3.73 
   0   7   3   16.04    5.75 
   0   7  -3   12.56    3.51 
   0   7  -3   16.52    3.37 
   0   7  -3   12.13    4.68 
   0   7   3   16.41    3.80 
   0   7  -3   12.13    3.07 
   0   7   3   16.65    3.33 
  -1  -7  -3    6.75    2.82 
  -1  -7  -3    4.68    3.58 
   1  -7   3    7.94    3.03 
   1  -7   3    7.65    2.89 
  -1  -7  -3    9.69    4.37 
  -1   7  -3   10.65    2.84 
  -1   7  -3   20.08    3.59 
   1   7   3   12.62    3.33 
  -1   7  -3   15.23    3.83 
   1   7   3   14.14    5.63 
  -1   7  -3   12.43    5.38 
   2  -7   3   22.36    4.23 
  -2  -7  -3   18.56    3.47 
   2  -7   3   24.51    6.33 
   2  -7   3   26.03    4.14 
  -2   7  -3   24.62    4.08 
   2   7   3   26.38    6.66 
   2   7   3   26.34    4.00 
   2   7   3   32.47    4.12 
  -2   7  -3   25.04    4.59 
  -2   7  -3   27.51    3.70 
  -2   7  -3   37.09    6.35 
   3  -7   3   10.59    6.46 
   3  -7   3   10.83    3.54 
  -3  -7  -3    8.36    2.88 
  -3  -7  -3   11.99    4.53 
   3  -7   3   12.07    3.99 
  -3   7  -3   11.84    4.27 
  -3   7  -3    2.18    4.05 
   3   7   3    8.75    3.02 
   3   7   3   11.98    3.12 
  -4  -7  -3   62.11    7.88 
  -4  -7  -3   52.18    5.79 
   4  -7   3   56.49    6.62 
   4  -7   3   47.97    8.58 
   4  -7   3   44.51    5.80 
   4   7   3   48.43    5.65 
  -4   7  -3   53.51    6.73 
  -4   7  -3   53.48    6.27 
   4   7   3   60.55    6.10 
  11   0  -4   12.68    4.12 
 -11   0   4   12.41    2.69 
 -11   0   4    9.51    3.68 
  11   0  -4   12.02    3.03 
  11   0  -4   15.15    3.55 
  10   0  -4    0.38    2.29 
 -10   0   4    5.60    2.00 
  10   0  -4   -0.44    2.01 
 -10   0   4    4.99    2.64 
 -10   0   4    2.03    1.50 
  10   0  -4    2.94    1.98 
  10   0  -4    3.24    2.82 
   9   0  -4  123.66    8.36 
  -9   0   4  129.40    7.55 
   9   0  -4  127.50    7.47 
  -9   0   4  132.43    7.27 
   9   0  -4  128.02    7.77 
   9   0  -4  128.80    7.38 
   9   0  -4  133.68    7.77 
  -9   0   4  136.84    8.21 
   8   0  -4    2.45    1.27 
   8   0  -4    1.87    1.85 
  -8   0   4    2.42    1.22 
  -8   0   4    1.49    1.56 
  -8   0   4    1.84    0.99 
   8   0  -4    1.42    1.36 
   8   0  -4    3.94    1.11 
   8   0  -4    2.39    1.24 
  -7   0   4   45.16    2.94 
  -7   0   4   43.18    3.09 
   7   0  -4   43.25    2.99 
   7   0  -4   43.21    3.10 
  -7   0   4   49.98    3.63 
   7   0  -4   42.05    3.79 
   7   0  -4   45.67    3.45 
   7   0  -4   46.23    3.32 
   6   0  -4    5.59    1.09 
   6   0  -4    3.60    1.36 
  -6   0   4    6.32    1.30 
  -6   0   4    5.21    0.92 
   6   0  -4    5.20    1.05 
   6   0  -4    3.89    1.04 
  -6   0   4    5.28    0.87 
  -5   0   4   70.20    3.92 
   5   0  -4   70.38    4.05 
   5   0  -4   70.18    3.85 
   5   0  -4   69.37    3.96 
   5   0  -4   71.71    4.23 
  -5   0   4   68.76    4.07 
   5   0  -4   68.94    3.87 
  -5   0   4   70.32    4.13 
   4   0  -4  302.71   14.67 
  -4   0   4  293.32   14.79 
   4   0  -4  308.02   14.49 
   4   0  -4  302.38   14.81 
  -4   0   4  310.12   14.84 
  -4   0   4  297.95   14.57 
   4   0  -4  306.02   14.67 
   4   0  -4  299.01   14.87 
  -4   0   4  314.23   14.72 
  -3   0   4  331.33   16.23 
  -3   0   4  334.53   16.14 
   3   0  -4  336.59   16.19 
  -3   0   4  349.64   16.50 
   3   0  -4  336.48   16.24 
   3   0  -4  342.93   16.53 
   3   0  -4  344.58   16.09 
   3   0  -4  351.69   16.49 
   2   0  -4  233.09   11.20 
   2   0  -4  241.84   11.40 
   2   0  -4  231.57   11.14 
   2   0  -4  236.13   11.42 
  -2   0   4  232.48   11.18 
  -2   0   4  246.95   11.39 
  -2   0   4  229.62   11.19 
   2   0  -4  231.70   11.20 
   1   0  -4  282.69   13.64 
   1   0  -4  297.92   13.98 
  -1   0   4  277.79   13.60 
  -1   0   4  292.85   14.00 
  -1   0   4  289.99   13.69 
   1   0  -4  298.35   13.65 
  -1   0   4  292.94   13.96 
   1   0  -4  288.19   13.99 
   0   0  -4  184.58    9.58 
   0   0   4  200.86    9.59 
   0   0  -4  196.33    9.58 
   0   0  -4  197.37    9.33 
   0   0   4  202.48    9.61 
   0   0   4  187.73    9.38 
   0   0   4  198.67    9.27 
   0   0  -4  204.42    9.40 
   1   0   4   15.04    1.10 
  -1   0  -4   14.60    1.16 
  -1   0  -4   15.28    1.08 
  -1   0  -4   15.40    1.12 
  -2   0  -4   47.28    2.71 
   2   0   4   48.87    2.77 
   2   0   4   48.42    2.75 
   2   0   4   46.89    2.79 
  -2   0  -4   46.12    2.77 
  -2   0  -4   46.81    2.73 
   3   0   4    9.55    1.32 
  -3   0  -4   12.03    1.22 
  -3   0  -4   11.23    1.25 
   3   0   4   10.55    1.26 
  -3   0  -4   10.52    1.43 
   3   0   4   11.76    1.23 
  -4   0  -4  357.89   18.25 
   4   0   4  364.75   18.16 
   4   0   4  378.27   18.31 
   4   0   4  387.64   18.67 
  -4   0  -4  391.41   18.64 
  -4   0  -4  377.98   18.63 
  -5   0  -4  263.91   14.03 
  -5   0  -4  285.02   14.25 
   5   0   4  278.19   13.86 
   5   0   4  290.17   14.12 
   5   0   4  283.40   14.26 
  -5   0  -4  282.86   14.21 
  -6   0  -4   29.64    2.97 
   6   0   4   28.82    2.64 
   6   0   4   28.92    2.82 
  -6   0  -4   30.65    2.58 
   6   0   4   30.40    2.63 
  -6   0  -4   28.97    2.64 
   6   0   4   26.00    2.77 
   7   0   4   40.03    3.44 
   7   0   4   41.60    3.77 
   7   0   4   41.86    3.66 
  -7   0  -4   42.41    3.46 
  -7   0  -4   42.03    3.94 
  -7   0  -4   42.47    3.40 
   8   0   4   13.50    2.93 
   8   0   4   16.99    2.65 
  -8   0  -4   16.40    2.92 
   8   0   4   19.46    2.85 
   8   0   4   19.33    2.64 
  -8   0  -4   19.97    2.57 
  -8   0  -4   20.87    2.56 
  -9   0  -4   20.75    3.57 
  -9   0  -4   18.26    2.85 
   9   0   4   22.55    3.74 
   9   0   4   24.27    3.51 
  -9   0  -4   21.37    2.93 
   9   0   4   18.72    2.80 
   9   0   4   18.44    3.57 
  10   0   4    0.89    2.76 
 -10   0  -4   -0.93    2.19 
 -10   0  -4    1.14    2.30 
  10   0   4   -3.37    3.29 
  10   0   4    4.50    3.98 
  10   0   4    1.98    2.31 
  11   0   4    0.62    3.02 
 -11   0  -4   -4.27    2.96 
 -11   0  -4   -1.82    4.71 
  11   0   4    1.32    4.64 
  11   0   4   -0.97    3.85 
  11  -1  -4   54.40    6.26 
 -11  -1   4   57.76    4.95 
  11  -1  -4   54.23    6.06 
  11  -1  -4   62.22    6.97 
 -11   1   4   38.52    5.24 
  11   1  -4   54.47    6.56 
 -11   1   4   50.74    6.21 
  11   1  -4   47.85    5.22 
  10  -1  -4  122.53    8.40 
  10  -1  -4  115.90    8.92 
 -10  -1   4  116.53    7.92 
  10  -1  -4  126.46    8.00 
 -10  -1   4  124.01    7.30 
 -10  -1   4  121.04    6.99 
 -10   1   4  115.45    8.70 
  10   1  -4  122.35    7.70 
 -10   1   4  125.77    7.73 
  10   1  -4  118.07    8.34 
  10   1  -4  131.76    7.65 
  10   1  -4  124.70    7.66 
  10   1  -4  129.32    7.73 
 -10   1   4  118.50    7.35 
   9  -1  -4   28.68    4.01 
   9  -1  -4   33.91    3.80 
  -9  -1   4   38.77    3.95 
   9  -1  -4   36.75    3.82 
  -9  -1   4   38.61    2.92 
   9  -1  -4   34.50    4.27 
  -9  -1   4   37.51    3.17 
   9  -1  -4   32.51    3.31 
   9   1  -4   33.35    3.41 
   9   1  -4   33.69    4.01 
   9   1  -4   28.49    3.39 
   9   1  -4   31.50    3.36 
  -9   1   4   33.10    4.61 
  -9   1   4   31.52    3.57 
  -9   1   4   29.49    3.26 
   9   1  -4   29.25    3.55 
  -8  -1   4    7.70    1.66 
  -8  -1   4    5.08    1.14 
   8  -1  -4    3.26    2.18 
   8  -1  -4    6.70    1.59 
  -8  -1   4    5.50    1.31 
   8  -1  -4    6.63    1.86 
   8  -1  -4    5.66    1.30 
   8   1  -4    4.33    1.27 
  -8   1   4    5.96    1.37 
   8   1  -4    6.73    1.35 
  -8   1   4    7.01    2.12 
   8   1  -4    5.32    1.49 
   8   1  -4    3.30    1.66 
  -8   1   4    6.63    1.65 
   7  -1  -4   19.66    2.45 
   7  -1  -4   17.43    2.69 
   7  -1  -4   22.45    2.17 
  -7  -1   4   22.81    2.02 
  -7  -1   4   20.66    1.83 
   7  -1  -4   21.07    2.59 
   7  -1  -4   23.31    2.77 
  -7  -1   4   23.03    2.44 
  -7   1   4   20.74    2.42 
   7   1  -4   22.94    2.03 
   7   1  -4   21.82    1.98 
   7   1  -4   21.76    2.18 
  -7   1   4   21.66    2.56 
   7   1  -4   21.84    2.37 
   7   1  -4   20.73    2.51 
  -7   1   4   28.44    3.01 
   6  -1  -4   18.88    2.14 
   6  -1  -4   21.28    2.14 
  -6  -1   4   21.32    1.85 
  -6  -1   4   20.43    1.62 
   6  -1  -4   21.76    2.30 
   6  -1  -4   22.48    2.67 
   6  -1  -4   20.45    1.86 
  -6   1   4   16.19    1.95 
   6   1  -4   19.49    1.63 
   6   1  -4   18.91    1.95 
   6   1  -4   18.61    1.60 
  -6   1   4   17.20    1.84 
   6   1  -4   15.87    1.66 
  -6   1   4   15.87    2.12 
   6   1  -4   17.09    1.95 
  -6   1   4   18.40    2.03 
   5  -1  -4   12.79    1.82 
   5  -1  -4    9.26    1.35 
   5  -1  -4   11.60    1.67 
   5  -1  -4   10.39    1.44 
   5  -1  -4   13.60    1.44 
  -5  -1   4   12.48    1.13 
  -5   1   4   12.78    1.43 
  -5   1   4   14.00    1.80 
  -5   1   4   12.54    1.51 
   5   1  -4   13.87    1.53 
   5   1  -4   12.45    1.19 
   5   1  -4   12.70    1.12 
   5   1  -4   12.06    1.11 
  -5   1   4   13.85    1.76 
   5   1  -4   11.73    1.40 
  -5   1   4   12.04    1.44 
   4  -1  -4   55.67    3.25 
   4  -1  -4   55.65    3.29 
  -4  -1   4   51.92    2.69 
  -4  -1   4   56.82    2.77 
   4  -1  -4   55.40    3.13 
   4  -1  -4   53.29    3.18 
   4  -1  -4   55.27    3.56 
  -4   1   4   52.57    3.34 
  -4   1   4   51.21    3.12 
   4   1  -4   50.76    2.78 
   4   1  -4   48.75    2.82 
   4   1  -4   50.73    2.78 
  -4   1   4   54.50    3.38 
  -4   1   4   54.67    3.21 
  -4   1   4   52.10    3.08 
   4   1  -4   49.28    3.05 
   4   1  -4   52.79    2.75 
   3  -1  -4  367.32   18.87 
  -3  -1   4  354.01   18.16 
   3  -1  -4  358.64   18.64 
   3  -1  -4  379.96   18.72 
  -3  -1   4  386.10   18.20 
   3  -1  -4  375.34   19.09 
   3  -1  -4  348.69   19.11 
  -3   1   4  417.06   19.17 
  -3   1   4  412.24   18.88 
   3   1  -4  403.28   18.72 
  -3   1   4  405.84   18.82 
  -3   1   4  408.17   19.14 
  -3   1   4  398.39   18.63 
   3   1  -4  412.15   18.62 
   3   1  -4  442.86   18.74 
   2  -1  -4  590.81   27.80 
   2  -1  -4  585.74   27.92 
   2  -1  -4  551.79   28.46 
   2  -1  -4  579.96   27.73 
   2  -1  -4  582.21   28.43 
  -2   1   4  589.89   28.43 
  -2   1   4  620.16   28.50 
  -2   1   4  609.15   27.72 
  -2   1   4  578.02   27.88 
  -2   1   4  602.67   27.81 
   1  -1  -4  272.46   13.43 
   1  -1  -4  265.12   13.14 
   1  -1  -4  288.48   13.42 
   1  -1  -4  280.05   13.28 
   1  -1  -4  272.60   13.07 
  -1  -1   4  279.49   12.81 
  -1  -1   4  284.64   13.18 
  -1   1   4  266.50   13.43 
  -1   1   4  265.58   13.27 
   1   1  -4  267.00   12.83 
  -1   1   4  261.03   13.13 
   1   1  -4  264.35   13.16 
  -1   1   4  278.62   13.39 
  -1   1   4  281.94   13.07 
   0  -1  -4   11.05    1.13 
   0  -1   4   10.22    0.85 
   0  -1   4   11.56    0.88 
   0  -1  -4   10.28    1.00 
   0  -1  -4   12.38    1.01 
   0  -1  -4   11.58    0.93 
   0   1   4    9.28    1.00 
   0   1  -4    7.66    0.86 
   0   1   4    8.14    1.09 
   0   1   4    8.13    0.85 
   0   1  -4    8.16    0.77 
   0   1  -4    8.21    0.49 
  -1  -1  -4   34.25    2.23 
  -1  -1  -4   32.71    2.20 
   1  -1   4   35.14    2.29 
  -1  -1  -4   33.11    2.29 
  -1  -1  -4   33.07    2.16 
   1  -1   4   32.81    2.15 
   1  -1   4   34.33    2.22 
   1   1   4   38.80    2.29 
  -1   1  -4   43.05    1.97 
  -1   1  -4   41.32    2.28 
   1   1   4   41.56    2.24 
   1   1   4   43.51    2.45 
  -1   1  -4   42.36    2.38 
   1   1   4   41.40    2.23 
  -2  -1  -4    6.59    0.87 
  -2  -1  -4    6.50    0.85 
   2  -1   4    6.09    0.90 
   2  -1   4    5.71    0.92 
  -2  -1  -4    3.74    0.72 
   2  -1   4    6.11    0.83 
  -2  -1  -4    5.13    0.82 
   2  -1   4    6.00    0.72 
  -2   1  -4    4.02    0.80 
   2   1   4    3.15    0.76 
  -2   1  -4    4.91    0.72 
   2   1   4    4.35    0.72 
  -2   1  -4    5.30    0.84 
   2   1   4    3.54    0.59 
   3  -1   4  144.00    7.84 
  -3  -1  -4  150.10    8.10 
  -3  -1  -4  148.61    7.92 
  -3  -1  -4  150.98    8.11 
   3  -1   4  158.02    8.20 
   3  -1   4  155.97    8.33 
   3  -1   4  156.02    8.14 
  -3  -1  -4  152.81    8.02 
   3   1   4  163.07    8.16 
   3   1   4  164.27    8.11 
   3   1   4  169.32    8.25 
  -3   1  -4  170.63    8.31 
  -3   1  -4  172.52    8.34 
  -3   1  -4  165.71    8.22 
   4  -1   4   57.96    3.49 
  -4  -1  -4   58.87    3.67 
   4  -1   4   57.91    3.62 
  -4  -1  -4   58.06    3.50 
  -4  -1  -4   56.49    3.53 
   4  -1   4   60.03    3.92 
   4  -1   4   61.35    3.79 
  -4  -1  -4   61.11    3.60 
  -4   1  -4   61.55    3.69 
  -4   1  -4   59.56    3.76 
   4   1   4   59.45    3.67 
  -4   1  -4   58.23    3.92 
   4   1   4   56.61    3.54 
   4   1   4   62.43    3.84 
   5  -1   4   42.84    3.51 
  -5  -1  -4   40.73    3.10 
   5  -1   4   45.65    3.20 
   5  -1   4   40.78    3.33 
   5  -1   4   44.39    3.67 
   5  -1   4   41.44    3.11 
  -5  -1  -4   43.37    3.28 
  -5  -1  -4   40.17    3.10 
   5   1   4   55.97    3.60 
  -5   1  -4   53.77    3.47 
   5   1   4   49.57    3.31 
  -5   1  -4   51.43    3.78 
   5   1   4   53.62    3.30 
  -5   1  -4   53.27    3.31 
  -6  -1  -4  148.50    8.11 
   6  -1   4  155.43    8.33 
  -6  -1  -4  145.56    8.16 
   6  -1   4  155.35    8.06 
   6  -1   4  144.07    8.74 
   6  -1   4  158.49    8.55 
  -6  -1  -4  157.60    8.24 
   6  -1   4  156.44    8.26 
   6   1   4  139.52    8.21 
  -6   1  -4  147.73    8.59 
  -6   1  -4  136.46    8.26 
   6   1   4  142.78    8.14 
   6   1   4  153.56    8.43 
   7  -1   4  105.58    7.43 
  -7  -1  -4  107.65    6.73 
   7  -1   4  109.25    7.09 
   7  -1   4  108.93    6.68 
  -7  -1  -4  112.47    6.89 
  -7  -1  -4  114.74    6.71 
   7  -1   4  113.60    7.05 
  -7   1  -4  112.04    7.28 
  -7   1  -4  117.61    6.95 
   7   1   4  122.14    7.41 
   7   1   4  119.35    6.78 
  -7   1  -4  124.25    6.81 
  -8  -1  -4   73.84    5.09 
   8  -1   4   78.32    5.34 
  -8  -1  -4   78.99    5.56 
  -8  -1  -4   79.21    5.30 
   8  -1   4   77.52    5.73 
   8  -1   4   66.90    6.12 
   8  -1   4   74.28    5.71 
   8   1   4   73.34    5.40 
   8   1   4   66.19    5.07 
  -8   1  -4   64.41    5.93 
  -8   1  -4   71.15    5.38 
  -8   1  -4   69.19    5.23 
   8   1   4   69.59    5.93 
   9  -1   4   12.79    2.61 
   9  -1   4   11.09    3.45 
  -9  -1  -4   11.58    3.07 
   9  -1   4    9.40    2.72 
  -9  -1  -4   14.22    2.63 
  -9  -1  -4    9.60    2.23 
   9  -1   4   13.27    3.26 
   9   1   4    8.75    2.21 
  -9   1  -4    9.08    2.66 
  -9   1  -4   11.61    2.51 
   9   1   4   10.28    3.23 
   9   1   4    8.59    2.42 
 -10  -1  -4    8.33    3.80 
  10  -1   4    4.74    3.82 
  10  -1   4    3.82    3.65 
  10  -1   4    4.23    3.48 
  10  -1   4    6.59    2.85 
 -10  -1  -4    4.24    2.52 
 -10   1  -4    0.87    3.59 
 -10   1  -4    5.97    2.71 
  10   1   4    8.38    2.89 
 -10   1  -4    4.82    2.78 
  10   1   4    6.53    3.19 
  10   1   4    4.67    3.55 
  10   1   4    7.62    4.30 
  11  -2  -4   12.40    4.31 
 -11  -2   4   17.33    2.57 
  11  -2  -4    8.22    3.29 
  11  -2  -4   13.58    5.25 
  11   2  -4   14.70    3.42 
 -11   2   4   21.33    5.18 
  11   2  -4   14.57    3.95 
 -11   2   4   15.14    3.31 
  10  -2  -4    6.23    2.64 
 -10  -2   4    3.48    2.36 
  10  -2  -4    2.85    3.88 
 -10  -2   4    6.57    1.85 
 -10  -2   4    2.11    1.41 
  10  -2  -4    5.32    3.04 
  10  -2  -4    5.45    3.06 
 -10  -2   4    4.97    2.55 
  10   2  -4    7.38    2.74 
  10   2  -4    6.52    2.72 
 -10   2   4    7.68    2.31 
  10   2  -4    9.09    2.62 
  10   2  -4    6.85    2.20 
 -10   2   4    5.59    2.36 
 -10   2   4   13.41    3.99 
  10   2  -4    8.21    2.52 
   9  -2  -4   40.76    5.06 
  -9  -2   4   36.07    3.11 
  -9  -2   4   38.75    3.55 
  -9  -2   4   37.82    3.81 
   9  -2  -4   36.71    4.81 
   9  -2  -4   44.15    4.47 
   9  -2  -4   39.09    4.39 
   9   2  -4   33.08    3.16 
  -9   2   4   40.19    5.27 
  -9   2   4   37.18    4.06 
   9   2  -4   39.36    3.78 
   9   2  -4   35.73    3.87 
   9   2  -4   34.82    3.93 
   9   2  -4   33.43    3.84 
  -8  -2   4   50.19    3.47 
   8  -2  -4   49.52    3.77 
   8  -2  -4   48.41    4.61 
  -8  -2   4   49.91    3.18 
  -8  -2   4   48.68    3.43 
   8  -2  -4   48.30    5.16 
   8  -2  -4   45.32    4.11 
   8   2  -4   45.14    3.85 
  -8   2   4   44.77    4.79 
   8   2  -4   38.62    3.63 
  -8   2   4   48.55    3.95 
   8   2  -4   44.87    3.25 
   8   2  -4   45.74    3.59 
  -8   2   4   48.40    4.06 
   8   2  -4   42.93    3.71 
   7  -2  -4   -1.48    1.17 
   7  -2  -4    1.06    1.53 
   7  -2  -4    1.09    1.47 
   7  -2  -4    0.48    2.01 
  -7  -2   4   -0.46    0.91 
  -7  -2   4    1.37    0.78 
  -7  -2   4    1.34    0.93 
   7  -2  -4   -0.22    1.01 
  -7  -2   4    1.23    0.70 
   7   2  -4    1.47    1.13 
  -7   2   4   -1.43    1.09 
  -7   2   4   -1.31    1.12 
   7   2  -4   -0.37    0.88 
  -7   2   4   -0.14    1.21 
   7   2  -4   -0.18    1.07 
   7   2  -4    0.97    1.07 
   7   2  -4   -0.03    0.69 
  -7   2   4    0.78    1.74 
  -6  -2   4   55.79    3.26 
   6  -2  -4   55.37    3.81 
   6  -2  -4   54.71    4.12 
  -6  -2   4   57.71    3.10 
   6  -2  -4   57.16    4.66 
  -6  -2   4   59.07    3.14 
   6  -2  -4   62.63    4.13 
   6  -2  -4   59.97    4.04 
   6   2  -4   53.89    3.41 
  -6   2   4   55.45    4.30 
  -6   2   4   52.88    4.28 
  -6   2   4   52.83    3.69 
   6   2  -4   49.46    3.68 
   6   2  -4   57.64    3.30 
  -6   2   4   51.98    3.79 
  -6   2   4   52.16    3.90 
   5  -2  -4  148.66    7.82 
  -5  -2   4  142.98    7.18 
   5  -2  -4  142.94    8.05 
   5  -2  -4  137.12    7.69 
   5  -2  -4  136.13    8.27 
   5  -2  -4  150.21    7.97 
  -5  -2   4  132.42    7.16 
  -5  -2   4  140.35    7.15 
   5   2  -4  143.82    7.22 
  -5   2   4  153.17    7.96 
  -5   2   4  158.18    7.66 
   5   2  -4  151.22    7.29 
   5   2  -4  155.61    7.35 
  -5   2   4  141.00    8.08 
  -5   2   4  141.32    7.86 
  -5   2   4  146.13    8.09 
   4  -2  -4  215.96   10.56 
   4  -2  -4  222.15   10.59 
   4  -2  -4  209.85   10.89 
  -4  -2   4  215.29    9.72 
   4  -2  -4  207.04   10.69 
  -4  -2   4  220.14    9.89 
  -4  -2   4  213.70    9.80 
   4  -2  -4  209.61   10.35 
  -4   2   4  191.71   10.16 
   4   2  -4  202.84   10.01 
  -4   2   4  197.55   10.63 
   4   2  -4  186.67    9.90 
  -4   2   4  195.94   10.54 
   4   2  -4  193.49    9.83 
  -4   2   4  196.74   10.67 
  -4   2   4  186.62   10.52 
   3  -2  -4  123.20    6.94 
  -3  -2   4  122.70    6.39 
   3  -2  -4  114.83    7.18 
  -3  -2   4  123.55    6.35 
   3  -2  -4  125.14    6.82 
  -3  -2   4  128.69    6.32 
  -3  -2   4  126.07    6.38 
   3  -2  -4  121.05    6.97 
   3  -2  -4  132.91    7.14 
  -3   2   4  139.80    7.09 
  -3   2   4  140.11    7.26 
  -3   2   4  132.55    7.01 
   3   2  -4  140.05    6.43 
   3   2  -4  144.28    6.53 
  -3   2   4  139.61    6.78 
   3   2  -4  132.69    6.42 
   3   2  -4  134.68    6.23 
  -3   2   4  137.31    7.17 
   2  -2  -4   38.51    2.51 
  -2  -2   4   35.07    1.96 
  -2  -2   4   34.52    1.90 
   2  -2  -4   33.96    2.54 
   2  -2  -4   34.88    2.33 
   2  -2  -4   37.12    2.84 
   2  -2  -4   37.70    2.36 
  -2   2   4   32.37    2.36 
   2   2  -4   32.87    2.01 
  -2   2   4   31.53    2.30 
   2   2  -4   30.71    1.86 
  -2   2   4   33.13    2.59 
   2   2  -4   33.87    1.94 
  -2   2   4   35.05    2.65 
   2   2  -4   31.48    1.93 
  -1  -2   4   80.86    4.15 
  -1  -2   4   81.06    4.29 
   1  -2  -4   85.39    4.85 
   1  -2  -4   87.59    4.59 
  -1  -2   4   78.96    4.16 
  -1  -2   4   81.37    4.23 
   1  -2  -4   80.91    4.60 
   1  -2  -4   79.45    4.45 
   1   2  -4   82.13    4.23 
   1   2  -4   81.25    4.07 
  -1   2   4   76.60    4.43 
   1   2  -4   80.53    4.21 
  -1   2   4   80.34    4.60 
  -1   2   4   76.63    4.51 
  -1   2   4   80.14    4.74 
   1   2  -4   77.83    4.17 
   1   2  -4   79.98    4.24 
  -1   2   4   78.56    4.33 
   0  -2   4  186.44    9.98 
   0  -2  -4  189.69   10.14 
   0  -2  -4  185.50   10.09 
   0  -2   4  188.30    9.90 
   0  -2   4  195.30    9.78 
   0  -2  -4  195.87   10.10 
   0  -2   4  189.95    9.95 
   0   2   4  195.57   10.21 
   0   2  -4  208.54    9.89 
   0   2  -4  214.35   10.00 
   0   2  -4  210.86    9.88 
   0   2   4  201.06   10.18 
   0   2   4  202.83   10.08 
   0   2  -4  206.27    9.98 
   0   2   4  204.12   10.02 
   0   2  -4  216.31    9.55 
   0   2   4  201.86    9.87 
   1  -2   4   35.77    2.38 
  -1  -2  -4   30.76    2.46 
  -1  -2  -4   32.65    2.35 
   1  -2   4   33.33    2.40 
  -1  -2  -4   30.37    2.37 
   1  -2   4   32.45    2.26 
  -1  -2  -4   30.66    2.27 
   1  -2   4   33.64    2.73 
   1  -2   4   31.31    2.01 
   1   2   4   41.96    2.81 
   1   2   4   41.72    2.42 
   1   2   4   38.24    2.46 
  -1   2  -4   38.75    2.54 
  -1   2  -4   39.17    2.36 
   1   2   4   38.83    2.44 
   1   2   4   39.44    2.34 
  -1   2  -4   39.87    2.00 
  -1   2  -4   38.06    2.40 
   2  -2   4   71.03    4.28 
  -2  -2  -4   72.85    3.91 
   2  -2   4   70.81    3.44 
  -2  -2  -4   71.65    3.76 
   2  -2   4   72.13    3.77 
  -2  -2  -4   68.53    3.71 
  -2  -2  -4   72.05    3.88 
   2  -2   4   71.75    3.95 
   2  -2   4   71.78    3.88 
  -2   2  -4   55.19    3.87 
   2   2   4   51.15    3.84 
  -2   2  -4   54.95    3.75 
   2   2   4   54.50    3.55 
  -2   2  -4   58.06    3.69 
   2   2   4   56.77    3.73 
   2   2   4   57.05    3.58 
  -2   2  -4   55.18    3.30 
   3  -2   4  285.87   15.48 
  -3  -2  -4  301.19   15.22 
   3  -2   4  292.26   14.71 
   3  -2   4  297.75   15.09 
  -3  -2  -4  294.95   15.01 
   3  -2   4  295.50   15.32 
   3  -2   4  291.27   15.47 
  -3  -2  -4  294.29   15.24 
  -3  -2  -4  299.39   14.98 
   3   2   4  328.33   15.33 
  -3   2  -4  316.82   15.38 
  -3   2  -4  320.93   15.42 
   3   2   4  318.51   15.19 
  -3   2  -4  312.69   14.70 
  -3   2  -4  317.72   15.47 
   3   2   4  326.60   15.40 
  -4  -2  -4   80.73    4.37 
  -4  -2  -4   73.76    4.34 
   4  -2   4   72.92    4.80 
   4  -2   4   73.37    4.39 
   4  -2   4   74.90    4.21 
  -4  -2  -4   76.33    4.41 
   4  -2   4   71.61    5.12 
  -4  -2  -4   72.20    4.24 
   4  -2   4   71.67    4.70 
   4   2   4   66.29    4.65 
  -4   2  -4   66.99    4.80 
  -4   2  -4   68.33    4.04 
  -4   2  -4   70.00    4.55 
   4   2   4   68.89    4.39 
   4   2   4   69.25    4.17 
   5  -2   4  109.27    6.14 
  -5  -2  -4  105.01    5.75 
   5  -2   4  106.82    5.94 
  -5  -2  -4  110.97    5.91 
  -5  -2  -4  109.41    5.94 
   5  -2   4  105.73    6.33 
  -5  -2  -4  109.89    5.91 
   5  -2   4  105.18    6.77 
   5  -2   4  111.22    5.85 
   5   2   4   88.11    5.86 
  -5   2  -4   92.28    6.37 
   5   2   4   86.13    6.16 
   5   2   4   83.51    5.57 
  -5   2  -4   94.58    6.10 
  -6  -2  -4   87.42    5.48 
  -6  -2  -4   82.00    5.42 
  -6  -2  -4   89.58    5.54 
   6  -2   4   85.47    5.94 
   6  -2   4   82.28    5.36 
  -6  -2  -4   86.88    5.29 
   6  -2   4   90.22    6.54 
   6  -2   4   85.18    5.48 
   6  -2   4   83.98    5.72 
   6   2   4   91.29    5.64 
  -6   2  -4   90.62    5.48 
   6   2   4   95.67    6.05 
  -6   2  -4   91.11    5.77 
  -6   2  -4   88.53    6.24 
   6   2   4   86.47    5.26 
  -7  -2  -4   14.49    2.31 
   7  -2   4   10.66    2.45 
  -7  -2  -4   12.76    1.88 
   7  -2   4   12.57    2.52 
   7  -2   4    6.48    2.75 
   7  -2   4   12.46    2.27 
  -7  -2  -4    9.89    2.06 
   7   2   4    9.49    2.58 
  -7   2  -4    9.95    2.78 
   7   2   4    7.85    1.69 
   7   2   4    6.84    1.87 
  -7   2  -4    5.62    1.84 
  -7   2  -4   10.54    2.00 
  -8  -2  -4   43.79    4.55 
  -8  -2  -4   52.74    4.64 
   8  -2   4   55.06    5.18 
  -8  -2  -4   55.53    4.96 
   8  -2   4   51.08    5.35 
  -8  -2  -4   49.51    4.04 
   8  -2   4   53.06    4.42 
   8  -2   4   52.26    4.64 
   8  -2   4   45.59    5.98 
   8   2   4   54.05    4.61 
  -8   2  -4   45.16    4.36 
  -8   2  -4   46.18    4.69 
   8   2   4   48.09    4.89 
   8   2   4   43.08    5.46 
  -9  -2  -4    5.09    2.12 
   9  -2   4    6.42    3.51 
   9  -2   4    8.96    3.26 
   9  -2   4   12.23    2.98 
  -9  -2  -4    4.35    2.85 
   9  -2   4   16.36    4.67 
  -9   2  -4   15.41    3.86 
   9   2   4    7.05    2.42 
   9   2   4   15.78    3.98 
  -9   2  -4    4.95    2.59 
  10  -2   4   16.99    4.58 
  10  -2   4   21.89    5.24 
 -10  -2  -4   18.99    4.25 
  10  -2   4   15.33    3.70 
 -10  -2  -4   18.19    3.11 
  10   2   4   18.64    3.52 
 -10   2  -4   20.13    3.96 
 -10   2  -4   12.47    3.47 
  10   2   4   22.29    3.96 
 -10   2  -4   17.83    5.24 
  10  -3  -4   24.61    4.24 
 -10  -3   4   25.79    3.20 
  10  -3  -4   26.02    4.64 
 -10  -3   4   22.24    3.54 
  10  -3  -4   26.54    5.45 
  10   3  -4   29.44    3.43 
  10   3  -4   31.28    3.72 
 -10   3   4   29.63    3.85 
 -10   3   4   28.01    5.52 
  -9  -3   4   32.27    2.92 
   9  -3  -4   30.01    5.20 
  -9  -3   4   29.40    3.51 
   9  -3  -4   40.81    4.70 
  -9  -3   4   29.87    3.35 
  -9  -3   4   35.56    2.91 
   9  -3  -4   28.16    3.86 
   9  -3  -4   41.48    5.58 
  -9   3   4   32.74    5.01 
   9   3  -4   32.13    4.23 
  -9   3   4   40.47    4.62 
   9   3  -4   39.68    3.22 
   9   3  -4   39.15    3.85 
  -9   3   4   29.91    3.69 
   9   3  -4   38.72    4.02 
   9   3  -4   29.52    3.88 
  -8  -3   4   12.94    1.99 
  -8  -3   4   11.52    1.38 
  -8  -3   4   11.34    1.41 
   8  -3  -4    9.14    2.40 
   8  -3  -4   10.28    2.67 
   8  -3  -4   11.52    2.87 
   8  -3  -4    9.48    3.30 
   8   3  -4    8.82    1.77 
  -8   3   4    8.86    2.06 
   8   3  -4    7.12    2.04 
  -8   3   4    7.64    2.18 
  -8   3   4    6.86    3.20 
  -8   3   4    7.32    2.03 
   8   3  -4   10.05    1.99 
   8   3  -4    9.31    1.47 
   7  -3  -4   14.83    2.68 
   7  -3  -4   18.27    2.61 
   7  -3  -4   18.00    2.89 
   7  -3  -4   16.10    3.50 
  -7  -3   4   17.56    1.71 
  -7  -3   4   17.63    2.38 
   7   3  -4   18.63    2.15 
   7   3  -4   18.71    2.19 
  -7   3   4   19.77    2.41 
  -7   3   4   17.60    3.27 
   7   3  -4   19.02    1.74 
  -7   3   4   22.55    3.10 
  -7   3   4   15.89    2.54 
  -6  -3   4   -0.05    0.59 
   6  -3  -4   -1.41    1.92 
   6  -3  -4    0.03    1.19 
   6  -3  -4    0.87    1.46 
   6  -3  -4   -0.23    1.23 
   6  -3  -4    0.54    1.73 
  -6   3   4    1.22    1.25 
  -6   3   4    1.03    1.18 
  -6   3   4   -0.72    1.77 
   6   3  -4    0.17    1.15 
   6   3  -4    1.27    0.58 
  -6   3   4    1.26    2.01 
   6   3  -4    2.19    0.91 
   5  -3  -4  125.78    6.68 
  -5  -3   4  119.28    5.85 
   5  -3  -4  114.28    7.64 
   5  -3  -4  122.34    6.66 
   5  -3  -4  118.42    7.01 
  -5  -3   4  123.62    5.80 
  -5  -3   4  122.76    6.03 
  -5   3   4  108.32    7.07 
   5   3  -4  105.77    6.00 
  -5   3   4  108.14    6.67 
   5   3  -4  107.56    5.79 
  -5   3   4  108.36    7.09 
  -5   3   4  104.93    6.68 
  -5   3   4  106.37    6.26 
   5   3  -4  110.03    6.13 
  -4  -3   4   78.14    4.35 
   4  -3  -4   80.39    5.69 
   4  -3  -4   84.20    5.26 
   4  -3  -4   80.71    5.21 
   4  -3  -4   74.09    4.79 
  -4  -3   4   74.20    4.16 
   4  -3  -4   76.81    4.84 
  -4  -3   4   79.41    4.13 
   4   3  -4   83.94    4.36 
  -4   3   4   80.83    4.99 
   4   3  -4   78.55    4.14 
  -4   3   4   82.25    5.47 
  -4   3   4   71.73    5.23 
  -4   3   4   78.08    5.00 
   4   3  -4   83.47    4.49 
  -4   3   4   80.43    4.66 
   3  -3  -4   96.28    5.95 
  -3  -3   4   96.87    5.41 
   3  -3  -4   97.66    6.19 
   3  -3  -4   91.27    5.81 
   3  -3  -4   97.23    6.60 
   3  -3  -4   97.71    6.16 
  -3  -3   4   94.09    5.47 
   3   3  -4  115.75    5.69 
  -3   3   4  117.80    6.23 
   3   3  -4  115.09    5.47 
  -3   3   4  119.31    6.50 
  -3   3   4  106.63    6.09 
   3   3  -4  113.89    5.41 
   3   3  -4  115.68    5.61 
   2  -3  -4  467.04   23.47 
   2  -3  -4  467.83   23.34 
  -2  -3   4  470.57   22.94 
   2  -3  -4  435.96   22.72 
  -2  -3   4  464.37   22.89 
   2  -3  -4  475.66   23.38 
  -2  -3   4  461.33   22.45 
   2  -3  -4  458.68   23.00 
  -2  -3   4  469.02   22.60 
   2   3  -4  489.19   22.58 
   2   3  -4  474.95   22.42 
  -2   3   4  485.38   23.45 
  -2   3   4  497.11   22.74 
   2   3  -4  496.53   23.03 
  -2   3   4  457.92   23.01 
   2   3  -4  475.23   22.91 
  -2   3   4  456.72   23.31 
  -2   3   4  487.63   23.28 
   1  -3  -4   48.88    4.06 
   1  -3  -4   54.58    3.80 
  -1  -3   4   55.11    3.42 
  -1  -3   4   53.49    3.24 
  -1  -3   4   59.19    3.75 
   1  -3  -4   57.43    3.63 
  -1  -3   4   58.90    3.40 
   1  -3  -4   57.01    3.73 
   1  -3  -4   56.69    3.57 
   1   3  -4   56.13    3.45 
   1   3  -4   57.63    3.31 
  -1   3   4   57.14    3.74 
  -1   3   4   58.47    4.17 
  -1   3   4   53.02    3.73 
  -1   3   4   57.14    3.49 
   1   3  -4   58.52    3.22 
  -1   3   4   54.11    3.56 
   1   3  -4   58.35    3.36 
   1   3  -4   58.00    3.58 
   0  -3   4   85.35    5.01 
   0  -3  -4   86.76    4.78 
   0  -3   4   91.39    4.70 
   0  -3   4   90.02    4.71 
   0  -3  -4   83.39    5.21 
   0  -3   4   88.90    4.57 
   0  -3  -4   86.12    4.98 
   0  -3  -4   82.03    4.80 
   0   3  -4   78.56    4.55 
   0   3  -4   80.50    4.79 
   0   3   4   77.97    4.77 
   0   3  -4   74.50    4.52 
   0   3   4   73.84    4.77 
   0   3  -4   77.53    4.26 
   0   3   4   76.79    5.12 
   0   3  -4   75.86    4.65 
   0   3   4   76.40    4.66 
   0   3   4   75.47    4.58 
  -1  -3  -4   96.51    5.77 
   1  -3   4   98.65    5.62 
   1  -3   4   94.38    5.50 
  -1  -3  -4   91.87    5.60 
   1  -3   4   93.75    5.66 
   1  -3   4   94.67    5.94 
   1  -3   4   95.93    5.25 
  -1  -3  -4   97.36    5.92 
  -1  -3  -4   96.32    5.63 
   1   3   4  110.52    5.60 
  -1   3  -4  104.21    5.63 
  -1   3  -4  108.62    5.87 
   1   3   4  100.30    5.56 
   1   3   4  104.00    5.69 
   1   3   4  104.69    6.16 
  -1   3  -4  106.40    5.17 
  -1   3  -4   99.88    5.79 
   1   3   4  101.64    5.74 
  -1   3  -4  104.68    5.68 
   2  -3   4   14.76    2.01 
   2  -3   4   15.50    1.59 
  -2  -3  -4   13.96    1.76 
   2  -3   4   14.91    1.77 
  -2  -3  -4   11.58    1.75 
   2  -3   4   13.55    2.12 
  -2  -3  -4   17.39    1.80 
  -2   3  -4   21.53    2.36 
   2   3   4   21.14    1.93 
  -2   3  -4   20.10    2.13 
  -2   3  -4   18.79    2.30 
  -2   3  -4   20.60    1.51 
   2   3   4   19.92    1.78 
   2   3   4   19.02    2.40 
  -3  -3  -4  125.66    6.83 
  -3  -3  -4  123.40    6.68 
   3  -3   4  130.15    6.92 
   3  -3   4  116.82    6.32 
  -3  -3  -4  126.18    6.65 
   3  -3   4  119.41    7.02 
   3  -3   4  124.48    6.75 
   3  -3   4  129.43    7.60 
  -3  -3  -4  125.89    6.76 
  -3   3  -4  108.45    7.02 
   3   3   4  112.00    6.48 
   3   3   4  113.93    6.40 
  -3   3  -4  124.09    6.82 
  -3   3  -4  115.03    6.86 
   3   3   4  118.27    6.76 
  -3   3  -4  114.43    6.18 
   3   3   4  115.54    7.13 
   4  -3   4   33.49    4.03 
   4  -3   4   33.12    2.96 
  -4  -3  -4   35.94    3.04 
   4  -3   4   32.62    3.32 
  -4  -3  -4   37.83    2.92 
   4  -3   4   35.18    2.74 
  -4  -3  -4   35.94    2.74 
   4  -3   4   33.14    3.14 
  -4  -3  -4   34.85    3.12 
   4   3   4   36.20    2.76 
   4   3   4   40.03    3.73 
   4   3   4   37.09    2.97 
  -4   3  -4   36.33    3.07 
  -4   3  -4   40.64    3.84 
  -4   3  -4   38.32    2.62 
  -4   3  -4   36.80    3.39 
  -5  -3  -4   62.96    4.37 
   5  -3   4   63.21    4.86 
   5  -3   4   62.62    5.14 
   5  -3   4   57.51    5.88 
   5  -3   4   67.64    4.49 
  -5  -3  -4   62.24    4.57 
   5  -3   4   64.16    4.70 
  -5  -3  -4   63.50    4.60 
  -5  -3  -4   66.13    4.78 
  -5   3  -4   73.48    4.83 
   5   3   4   78.26    5.39 
   5   3   4   79.10    4.90 
   5   3   4   80.44    4.48 
  -5   3  -4   78.21    5.69 
  -5   3  -4   77.84    4.35 
  -5   3  -4   75.33    5.20 
   6  -3   4  158.81   10.17 
   6  -3   4  161.87    8.85 
   6  -3   4  162.43    8.60 
   6  -3   4  168.60    9.09 
  -6  -3  -4  168.45    9.02 
  -6  -3  -4  160.78    8.73 
  -6  -3  -4  164.02    8.58 
   6  -3   4  158.00    9.42 
   6   3   4  141.08    8.32 
  -6   3  -4  147.18    8.29 
  -6   3  -4  132.11    9.33 
  -6   3  -4  135.47    8.97 
   6   3   4  133.28    9.28 
   6   3   4  140.69    8.75 
  -7  -3  -4   43.45    4.12 
   7  -3   4   40.92    4.97 
  -7  -3  -4   26.83    3.60 
   7  -3   4   40.51    4.33 
  -7  -3  -4   38.18    3.33 
  -7  -3  -4   37.47    4.06 
   7  -3   4   38.58    4.30 
   7  -3   4   31.25    4.80 
  -7   3  -4   25.08    4.16 
   7   3   4   20.66    4.04 
   7   3   4   29.06    4.08 
   7   3   4   26.25    3.26 
  -7   3  -4   27.80    3.84 
  -7   3  -4   29.68    4.25 
  -8  -3  -4   45.42    4.98 
   8  -3   4   34.41    5.49 
   8  -3   4   41.85    4.93 
   8  -3   4   42.74    5.81 
  -8  -3  -4   47.35    4.05 
  -8  -3  -4   41.98    5.03 
   8  -3   4   41.16    4.95 
   8   3   4   38.96    5.21 
  -8   3  -4   43.08    5.90 
  -8   3  -4   46.27    5.14 
   8   3   4   44.06    4.27 
  -9  -3  -4   11.32    3.29 
   9  -3   4    9.44    4.94 
   9  -3   4    8.41    3.18 
   9  -3   4    6.13    3.83 
  -9  -3  -4    7.52    2.27 
  -9   3  -4    5.58    2.83 
  -9   3  -4    7.85    3.35 
   9   3   4    7.84    2.80 
   9   3   4    5.59    2.73 
  -9   3  -4   11.67    4.66 
 -10  -3  -4    8.25    2.88 
  10  -3   4   12.42    5.77 
  10  -3   4    6.07    3.97 
  10  -3   4   15.03    4.93 
  10   3   4    6.19    3.50 
 -10   3  -4   13.64    3.96 
 -10   3  -4   20.23    5.91 
 -10  -4   4    4.51    1.66 
  10  -4  -4    3.80    4.67 
  10  -4  -4    1.74    4.01 
  10  -4  -4   -4.86    5.70 
 -10   4   4    2.51    3.22 
 -10   4   4    0.92    5.37 
  10   4  -4   -0.10    2.75 
  10   4  -4    3.58    2.99 
   9  -4  -4   32.95    5.29 
   9  -4  -4   25.49    4.65 
   9  -4  -4   25.64    4.41 
  -9  -4   4   23.79    2.70 
   9  -4  -4   33.68    6.01 
  -9  -4   4   28.44    2.70 
  -9   4   4   26.43    5.37 
   9   4  -4   19.13    3.03 
  -9   4   4   26.01    3.85 
   9   4  -4   18.88    3.40 
   8  -4  -4   36.11    4.83 
  -8  -4   4   29.18    2.50 
   8  -4  -4   29.60    5.65 
   8  -4  -4   24.77    3.91 
  -8  -4   4   31.49    3.91 
   8  -4  -4   26.48    3.79 
  -8  -4   4   24.11    2.55 
   8   4  -4   28.97    3.49 
   8   4  -4   32.46    4.12 
  -8   4   4   34.70    4.96 
  -8   4   4   36.83    4.97 
  -8   4   4   28.97    3.63 
   8   4  -4   31.20    2.62 
  -7  -4   4   44.07    3.99 
  -7  -4   4   47.21    2.89 
   7  -4  -4   50.70    4.79 
   7  -4  -4   58.94    6.86 
   7  -4  -4   48.68    5.18 
   7  -4  -4   51.33    5.61 
  -7  -4   4   46.53    3.02 
   7  -4  -4   42.77    4.57 
   7   4  -4   41.90    2.92 
  -7   4   4   40.59    4.04 
   7   4  -4   41.13    3.49 
  -7   4   4   40.98    4.45 
   7   4  -4   39.12    4.00 
  -7   4   4   29.82    4.54 
  -7   4   4   38.79    4.71 
  -6  -4   4   65.93    4.54 
   6  -4  -4   70.94    5.99 
   6  -4  -4   70.46    5.21 
   6  -4  -4   62.30    6.33 
  -6  -4   4   67.03    3.87 
   6  -4  -4   69.31    5.55 
  -6   4   4   72.23    5.46 
   6   4  -4   62.66    4.67 
  -6   4   4   71.36    6.05 
  -6   4   4   70.72    6.15 
   6   4  -4   70.71    4.36 
  -6   4   4   70.90    4.84 
   6   4  -4   70.63    3.93 
  -6   4   4   64.33    5.22 
   5  -4  -4   41.20    4.38 
  -5  -4   4   42.04    2.46 
  -5  -4   4   44.27    2.72 
  -5  -4   4   37.98    2.48 
   5  -4  -4   44.06    3.70 
   5  -4  -4   48.74    5.28 
   5  -4  -4   39.47    4.16 
  -5  -4   4   46.39    3.25 
   5  -4  -4   42.43    3.54 
   5   4  -4   30.94    2.76 
  -5   4   4   26.81    3.68 
  -5   4   4   28.21    3.86 
  -5   4   4   27.17    3.45 
  -5   4   4   28.48    3.05 
   5   4  -4   33.68    3.16 
  -5   4   4   29.78    3.82 
   5   4  -4   28.72    2.29 
  -4  -4   4  228.94   11.96 
  -4  -4   4  236.56   12.04 
  -4  -4   4  235.50   12.13 
   4  -4  -4  244.79   12.87 
   4  -4  -4  237.19   12.96 
   4  -4  -4  218.68   12.47 
   4  -4  -4  233.84   13.60 
   4  -4  -4  233.89   13.10 
  -4   4   4  257.22   12.39 
  -4   4   4  249.28   13.02 
   4   4  -4  249.98   11.79 
   4   4  -4  246.86   12.31 
   4   4  -4  245.88   12.05 
  -4   4   4  247.10   13.40 
   4   4  -4  242.93   12.27 
  -4   4   4  240.86   12.94 
  -4   4   4  253.84   13.29 
  -3  -4   4   24.42    2.46 
  -3  -4   4   24.95    2.06 
   3  -4  -4   22.15    2.71 
  -3  -4   4   26.39    1.99 
   3  -4  -4   30.59    3.12 
   3  -4  -4   24.65    2.68 
   3  -4  -4   23.03    2.82 
   3  -4  -4   29.80    3.86 
  -3  -4   4   25.10    2.59 
  -3   4   4   16.57    2.18 
   3   4  -4   19.18    2.07 
  -3   4   4   20.89    2.88 
  -3   4   4   20.00    2.66 
   3   4  -4   18.45    2.02 
   3   4  -4   17.01    2.35 
  -3   4   4   17.87    2.83 
  -3   4   4   22.05    3.17 
  -2  -4   4   29.95    2.70 
  -2  -4   4   30.69    2.45 
   2  -4  -4   31.82    3.01 
  -2  -4   4   28.78    3.17 
   2  -4  -4   29.60    3.31 
  -2  -4   4   29.60    2.53 
   2  -4  -4   32.88    3.13 
   2  -4  -4   30.72    2.91 
   2  -4  -4   28.83    3.85 
   2   4  -4   32.66    2.75 
  -2   4   4   36.59    3.13 
  -2   4   4   34.22    2.82 
  -2   4   4   33.51    3.41 
  -2   4   4   37.37    3.85 
   2   4  -4   36.50    2.54 
   2   4  -4   37.40    2.71 
   2   4  -4   37.49    3.10 
   2   4  -4   34.90    2.56 
  -2   4   4   34.83    3.09 
  -1  -4   4  142.19    7.98 
   1  -4  -4  151.80    8.53 
   1  -4  -4  142.22    8.05 
   1  -4  -4  143.11    8.84 
   1  -4  -4  147.17    8.23 
  -1  -4   4  145.16    7.98 
   1  -4  -4  132.76    8.22 
  -1  -4   4  137.47    7.79 
  -1  -4   4  146.68    8.39 
  -1   4   4  153.81    7.99 
   1   4  -4  147.83    7.90 
   1   4  -4  150.78    8.18 
  -1   4   4  154.52    8.44 
   1   4  -4  153.27    7.99 
  -1   4   4  151.21    8.20 
   1   4  -4  156.78    7.69 
   1   4  -4  152.15    8.03 
  -1   4   4  153.14    8.37 
   0  -4   4   24.04    2.25 
   0  -4   4   24.88    2.50 
   0  -4  -4   24.06    3.04 
   0  -4  -4   25.81    3.00 
   0  -4  -4   25.01    2.57 
   0  -4   4   25.20    3.14 
   0  -4   4   23.31    2.47 
   0  -4  -4   22.88    2.53 
   0   4  -4   22.47    2.55 
   0   4   4   21.78    2.31 
   0   4  -4   24.19    2.32 
   0   4  -4   25.15    2.36 
   0   4   4   23.31    2.61 
   0   4  -4   27.29    2.88 
   0   4   4   24.69    3.15 
   0   4   4   27.61    2.74 
   0   4   4   27.79    2.53 
   0   4  -4   23.34    2.04 
  -1  -4  -4   57.95    4.10 
   1  -4   4   58.98    3.93 
  -1  -4  -4   56.17    4.43 
  -1  -4  -4   60.41    4.11 
   1  -4   4   57.82    4.87 
   1  -4   4   59.32    3.76 
   1  -4   4   54.70    4.16 
   1  -4   4   59.33    4.22 
  -1  -4  -4   57.39    4.64 
  -1   4  -4   62.63    4.56 
  -1   4  -4   64.18    4.13 
  -1   4  -4   62.20    3.63 
   1   4   4   65.38    4.07 
   1   4   4   61.55    4.24 
   1   4   4   62.47    4.27 
  -1   4  -4   62.02    4.07 
   1   4   4   64.47    4.94 
   1   4   4   64.96    4.10 
  -1   4  -4   59.84    4.44 
   2  -4   4   69.40    4.78 
  -2  -4  -4   71.69    4.58 
  -2  -4  -4   63.97    4.86 
  -2  -4  -4   69.63    4.83 
   2  -4   4   68.02    4.22 
   2  -4   4   69.74    5.52 
   2  -4   4   73.24    4.56 
  -2  -4  -4   74.16    4.62 
   2  -4   4   73.74    4.83 
  -2   4  -4   76.32    5.16 
  -2   4  -4   70.66    4.95 
   2   4   4   66.71    5.36 
  -2   4  -4   71.23    4.60 
   2   4   4   65.13    4.37 
  -2   4  -4   67.98    4.70 
   2   4   4   68.54    4.48 
  -2   4  -4   67.19    4.02 
   2   4   4   70.03    4.56 
   2   4   4   69.61    4.71 
   3  -4   4   37.09    3.03 
   3  -4   4   38.35    4.50 
   3  -4   4   33.33    3.59 
  -3  -4  -4   35.72    3.54 
  -3  -4  -4   35.26    3.14 
  -3  -4  -4   42.43    3.43 
   3  -4   4   35.88    3.73 
  -3  -4  -4   39.42    3.69 
  -3   4  -4   37.13    3.63 
  -3   4  -4   39.55    3.34 
   3   4   4   42.79    3.12 
   3   4   4   53.04    4.56 
  -3   4  -4   46.43    2.92 
   3   4   4   43.84    3.52 
   3   4   4   38.68    3.40 
  -3   4  -4   42.94    4.15 
   3   4   4   41.95    3.12 
  -3   4  -4   39.54    3.86 
  -4  -4  -4   23.27    3.01 
   4  -4   4   24.24    3.42 
   4  -4   4   26.63    4.05 
  -4  -4  -4   20.94    2.84 
   4  -4   4   25.34    2.95 
   4  -4   4   25.62    2.71 
  -4  -4  -4   24.73    3.28 
   4  -4   4   22.72    2.96 
  -4  -4  -4   24.99    2.58 
   4   4   4   22.62    2.93 
  -4   4  -4   28.07    3.49 
  -4   4  -4   20.45    2.22 
  -4   4  -4   19.69    3.33 
   4   4   4   22.04    2.44 
   4   4   4   19.97    3.26 
   4   4   4   17.74    2.13 
  -4   4  -4   21.61    2.92 
   5  -4   4  134.97    9.60 
  -5  -4  -4  138.25    7.87 
   5  -4   4  129.03    7.67 
   5  -4   4  138.68    8.09 
  -5  -4  -4  136.07    7.62 
  -5  -4  -4  134.37    7.97 
   5  -4   4  131.41    8.25 
   5   4   4  137.58    8.93 
   5   4   4  136.75    7.62 
  -5   4  -4  134.01    8.96 
  -5   4  -4  129.34    8.06 
   5   4   4  131.87    8.11 
  -5   4  -4  138.78    7.42 
  -5   4  -4  127.05    8.43 
   6  -4   4   17.40    3.21 
  -6  -4  -4   20.83    3.32 
  -6  -4  -4   18.40    2.32 
   6  -4   4   21.22    3.25 
   6  -4   4   17.88    4.28 
  -6  -4  -4   18.61    2.74 
  -6  -4  -4   15.56    2.68 
   6  -4   4   19.21    2.71 
   6   4   4   15.56    2.22 
  -6   4  -4   12.00    2.12 
  -6   4  -4   14.42    3.08 
  -6   4  -4   17.01    3.60 
   6   4   4   18.28    3.91 
   6   4   4   17.70    2.74 
   7  -4   4    4.55    2.24 
   7  -4   4    6.75    3.97 
  -7  -4  -4    4.34    2.40 
  -7  -4  -4    4.37    1.66 
  -7  -4  -4    4.97    2.48 
   7  -4   4    0.19    2.84 
  -7   4  -4    4.50    3.36 
  -7   4  -4    5.40    2.68 
   7   4   4    3.58    3.92 
  -7   4  -4    8.19    2.46 
   7   4   4    3.60    1.84 
   8  -4   4   42.20    5.72 
   8  -4   4   38.35    4.58 
  -8  -4  -4   38.82    5.35 
  -8  -4  -4   41.73    4.08 
   8  -4   4   31.09    6.04 
  -8   4  -4   30.63    4.47 
  -8   4  -4   26.06    5.14 
   8   4   4   32.90    4.42 
   8   4   4   29.85    6.01 
   9  -4   4    7.64    6.17 
   9  -4   4   15.14    5.07 
   9  -4   4   11.78    4.01 
  -9  -4  -4   11.93    2.86 
  -9   4  -4   15.85    5.80 
  -9   4  -4    9.49    3.70 
   9  -5  -4   13.53    6.60 
   9  -5  -4    6.99    4.01 
   9  -5  -4   10.15    5.40 
  -9   5   4    8.06    3.76 
   9   5  -4    6.30    3.52 
  -9   5   4    2.74    5.77 
   8  -5  -4   45.26    5.33 
   8  -5  -4   39.18    6.87 
   8  -5  -4   42.58    5.91 
  -8   5   4   33.85    4.51 
  -8   5   4   43.37    6.52 
   7  -5  -4   15.42    3.98 
   7  -5  -4   14.69    3.41 
  -7  -5   4   19.91    2.31 
  -7  -5   4   17.56    2.06 
   7  -5  -4   15.81    5.06 
  -7  -5   4   17.97    3.21 
  -7   5   4   17.62    3.92 
  -7   5   4   17.80    4.40 
   7   5  -4   21.12    2.97 
   7   5  -4   21.77    2.34 
   7   5  -4   27.14    3.77 
  -7   5   4   17.39    3.23 
   6  -5  -4   12.32    3.46 
   6  -5  -4    7.95    2.60 
  -6  -5   4    7.93    1.36 
  -6  -5   4    9.02    1.74 
   6  -5  -4    3.59    4.14 
   6  -5  -4    7.72    3.04 
  -6  -5   4    4.66    1.47 
  -6  -5   4   10.22    2.47 
   6   5  -4    5.31    2.12 
  -6   5   4    4.54    2.24 
  -6   5   4    8.29    3.73 
   6   5  -4    5.33    1.86 
   6   5  -4    6.15    1.35 
   5  -5  -4   24.82    3.52 
   5  -5  -4   29.50    4.13 
  -5  -5   4   31.92    2.60 
   5  -5  -4   25.75    3.29 
  -5  -5   4   31.26    3.69 
   5  -5  -4   31.99    5.15 
  -5  -5   4   25.90    3.00 
  -5   5   4   32.39    4.14 
   5   5  -4   26.94    2.69 
   5   5  -4   28.18    2.41 
   5   5  -4   35.49    3.83 
   5   5  -4   32.40    3.28 
  -5   5   4   35.89    4.68 
  -5   5   4   29.39    4.29 
  -5   5   4   27.02    3.56 
   4  -5  -4   23.23    3.43 
  -4  -5   4   20.80    2.64 
   4  -5  -4   25.51    3.32 
  -4  -5   4   20.16    2.71 
   4  -5  -4   19.40    4.24 
  -4  -5   4   19.50    2.33 
   4  -5  -4   18.18    2.66 
  -4  -5   4   22.42    2.38 
  -4   5   4   26.52    3.99 
   4   5  -4   22.87    2.39 
   4   5  -4   22.83    2.81 
   4   5  -4   19.95    2.60 
  -4   5   4   24.26    3.37 
  -4   5   4   21.46    2.91 
   4   5  -4   20.89    2.79 
  -4   5   4   18.99    3.48 
   4   5  -4   17.52    2.23 
  -3  -5   4   17.74    2.35 
   3  -5  -4   17.89    2.75 
  -3  -5   4   20.10    2.42 
  -3  -5   4   19.80    2.50 
   3  -5  -4   22.45    2.92 
  -3  -5   4   16.70    2.70 
   3  -5  -4   18.19    2.92 
   3  -5  -4   22.22    3.36 
   3  -5  -4   17.64    3.81 
   3   5  -4   13.22    2.42 
  -3   5   4   15.65    3.45 
  -3   5   4   13.33    2.55 
  -3   5   4   16.82    2.38 
  -3   5   4   12.07    2.67 
  -3   5   4   13.48    3.23 
   3   5  -4   14.32    2.16 
   3   5  -4   18.11    2.27 
   3   5  -4   12.45    1.94 
   3   5  -4   15.03    2.16 
   2  -5  -4  121.93    9.06 
   2  -5  -4  128.77    7.85 
   2  -5  -4  125.09    8.10 
  -2  -5   4  130.80    7.52 
  -2  -5   4  123.95    7.40 
  -2  -5   4  133.90    8.21 
  -2  -5   4  127.89    7.70 
   2  -5  -4  130.96    8.45 
   2  -5  -4  129.28    8.09 
   2   5  -4  139.31    7.52 
  -2   5   4  141.48    8.48 
   2   5  -4  136.96    7.72 
   2   5  -4  140.29    7.73 
   2   5  -4  145.22    7.54 
  -2   5   4  141.64    7.76 
   2   5  -4  143.85    8.16 
  -2   5   4  140.33    8.91 
  -2   5   4  132.04    8.21 
  -2   5   4  134.70    8.07 
   1  -5  -4   51.72    5.45 
  -1  -5   4   49.74    3.69 
  -1  -5   4   41.52    4.85 
  -1  -5   4   51.51    4.10 
   1  -5  -4   46.05    4.18 
   1  -5  -4   52.44    4.72 
  -1  -5   4   52.49    3.92 
   1  -5  -4   49.65    4.16 
  -1   5   4   47.72    4.13 
   1   5  -4   49.87    4.49 
  -1   5   4   48.81    3.94 
   1   5  -4   49.03    4.12 
  -1   5   4   51.36    4.38 
   1   5  -4   56.10    3.75 
  -1   5   4   49.37    5.29 
   1   5  -4   49.91    3.86 
  -1   5   4   45.48    4.46 
   1   5  -4   47.50    3.70 
   0  -5   4   53.33    4.05 
   0  -5   4   51.25    5.30 
   0  -5   4   51.04    4.26 
   0  -5  -4   45.33    4.13 
   0  -5  -4   49.01    4.20 
   0  -5  -4   51.29    5.26 
   0  -5   4   46.07    3.83 
   0   5  -4   49.42    3.93 
   0   5  -4   53.33    4.40 
   0   5   4   54.70    4.10 
   0   5   4   54.78    5.21 
   0   5   4   49.38    4.44 
   0   5  -4   50.12    3.95 
   0   5  -4   60.53    4.88 
   0   5  -4   50.09    3.61 
   0   5   4   53.82    4.08 
   1  -5   4   59.53    4.84 
  -1  -5  -4   63.36    4.51 
   1  -5   4   57.38    4.58 
  -1  -5  -4   61.78    4.74 
  -1  -5  -4   58.19    5.34 
   1  -5   4   68.38    5.75 
   1  -5   4   59.10    4.37 
  -1   5  -4   60.91    4.74 
  -1   5  -4   54.97    4.28 
  -1   5  -4   60.42    5.22 
  -1   5  -4   55.80    4.43 
   1   5   4   54.95    5.50 
   1   5   4   58.89    4.30 
   1   5   4   58.67    4.44 
  -1   5  -4   57.76    3.87 
   1   5   4   54.92    4.49 
  -2  -5  -4   13.97    2.33 
  -2  -5  -4   14.91    2.80 
   2  -5   4   14.52    2.12 
   2  -5   4   15.81    2.48 
   2  -5   4   14.51    2.37 
   2  -5   4   19.48    3.75 
   2   5   4   16.00    2.28 
  -2   5  -4   14.73    2.92 
  -2   5  -4   19.25    2.81 
   2   5   4   15.67    3.26 
  -2   5  -4   19.05    2.19 
   2   5   4   18.72    2.38 
  -2   5  -4   19.52    3.09 
  -3  -5  -4   30.93    3.59 
   3  -5   4   25.30    3.22 
   3  -5   4   28.14    3.67 
  -3  -5  -4   30.50    4.10 
   3  -5   4   30.53    3.75 
   3  -5   4   25.16    4.42 
  -3  -5  -4   28.36    3.31 
  -3   5  -4   38.45    4.14 
  -3   5  -4   34.15    4.70 
   3   5   4   33.87    3.22 
   3   5   4   37.38    3.36 
   3   5   4   34.73    4.43 
  -3   5  -4   38.16    2.97 
   3   5   4   39.74    3.77 
  -3   5  -4   37.26    4.45 
   4  -5   4   13.78    2.87 
   4  -5   4    8.97    2.19 
   4  -5   4   12.81    2.25 
  -4  -5  -4   12.44    2.41 
  -4  -5  -4   11.99    2.12 
   4  -5   4   15.64    3.03 
  -4  -5  -4   12.59    2.85 
  -4  -5  -4   10.93    2.56 
   4  -5   4   12.01    3.85 
   4   5   4   14.17    2.06 
  -4   5  -4   13.76    2.01 
   4   5   4   13.28    2.14 
  -4   5  -4   16.38    2.74 
   4   5   4   17.46    3.68 
   4   5   4   13.38    2.55 
  -4   5  -4   12.15    2.76 
  -4   5  -4   11.99    3.10 
   4   5   4   15.44    2.75 
  -5  -5  -4   12.47    2.16 
  -5  -5  -4   17.46    2.85 
   5  -5   4   11.55    2.92 
   5  -5   4   15.59    4.35 
  -5  -5  -4   13.24    2.83 
   5  -5   4   10.47    2.38 
   5   5   4   14.18    4.07 
   5   5   4   12.52    2.20 
  -5   5  -4    9.34    2.62 
  -5   5  -4    9.72    3.03 
  -5   5  -4   12.99    2.24 
  -5   5  -4   11.89    3.09 
   6  -5   4   60.79    5.57 
  -6  -5  -4   56.20    4.81 
   6  -5   4   59.23    6.60 
   6  -5   4   60.86    7.59 
  -6  -5  -4   53.91    5.77 
  -6  -5  -4   61.87    5.68 
   6  -5   4   62.50    6.11 
  -6   5  -4   63.37    7.09 
   6   5   4   73.84    8.59 
  -6   5  -4   57.44    6.28 
  -6   5  -4   58.91    5.02 
   6   5   4   57.16    4.78 
   7  -5   4   27.81    4.26 
  -7  -5  -4   25.98    3.23 
  -7  -5  -4   39.98    5.33 
   7  -5   4   28.81    5.23 
   7  -5   4   30.95    6.42 
   7   5   4   18.79    3.01 
  -7   5  -4   24.27    4.45 
  -7   5  -4   21.88    5.11 
   8  -5   4   28.43    4.72 
   8  -5   4   18.84    7.23 
   8  -5   4   27.22    5.39 
  -8  -5  -4   23.29    3.34 
  -8   5  -4   27.44    6.08 
  -8   5  -4   28.26    5.21 
   7  -6  -4   34.36    7.78 
  -7  -6   4   26.33    3.25 
   7  -6  -4   29.36    5.33 
   7  -6  -4   30.46    4.94 
  -7   6   4   26.10    4.97 
  -7   6   4   32.93    6.11 
   6  -6  -4   42.27    6.96 
  -6  -6   4   36.08    4.37 
   6  -6  -4   39.95    4.83 
  -6  -6   4   29.53    3.35 
   6  -6  -4   33.51    5.27 
  -6   6   4   23.43    5.15 
  -6   6   4   37.19    4.94 
  -5  -6   4   25.96    3.52 
  -5  -6   4   32.27    3.99 
   5  -6  -4   27.57    4.00 
  -5  -6   4   33.48    4.47 
  -5  -6   4   30.99    3.31 
   5  -6  -4   40.18    5.09 
   5  -6  -4   28.69    5.71 
   5   6  -4   29.19    3.31 
  -5   6   4   30.38    5.16 
   5   6  -4   30.00    3.97 
  -5   6   4   34.39    4.53 
   5   6  -4   29.46    3.12 
   5   6  -4   31.58    4.12 
   4  -6  -4   21.60    5.07 
  -4  -6   4   29.47    3.40 
  -4  -6   4   27.28    3.18 
  -4  -6   4   30.50    3.60 
   4  -6  -4   31.08    4.00 
  -4  -6   4   30.95    3.68 
   4  -6  -4   24.45    3.51 
   4  -6  -4   19.84    3.46 
   4   6  -4   27.61    3.42 
   4   6  -4   25.64    3.25 
  -4   6   4   22.31    4.41 
   4   6  -4   26.78    3.75 
  -4   6   4   23.75    3.51 
   4   6  -4   25.21    3.36 
   4   6  -4   23.02    3.30 
  -3  -6   4   50.13    4.17 
  -3  -6   4   53.68    4.25 
   3  -6  -4   59.84    5.56 
   3  -6  -4   50.85    5.17 
   3  -6  -4   39.97    5.93 
  -3  -6   4   40.02    5.09 
  -3  -6   4   48.73    5.47 
   3   6  -4   43.18    4.61 
   3   6  -4   57.04    5.65 
   3   6  -4   43.17    4.74 
  -3   6   4   56.43    7.45 
  -3   6   4   51.97    5.26 
   3   6  -4   51.52    4.30 
  -3   6   4   50.54    5.76 
   3   6  -4   46.35    4.08 
  -2  -6   4    1.77    3.08 
  -2  -6   4    4.02    2.54 
   2  -6  -4    1.94    2.52 
  -2  -6   4    1.00    1.65 
   2  -6  -4   -3.99    3.42 
  -2  -6   4    1.35    1.74 
   2  -6  -4    2.27    1.97 
   2   6  -4   -2.57    2.49 
  -2   6   4    0.00    2.55 
  -2   6   4   -0.34    2.04 
   2   6  -4   -0.07    1.82 
  -2   6   4    1.41    2.13 
   2   6  -4    1.36    1.99 
   2   6  -4    2.12    1.96 
  -2   6   4    4.64    3.82 
  -2   6   4    6.30    2.75 
   2   6  -4    3.16    1.76 
   1  -6  -4   46.45    4.82 
  -1  -6   4   43.87    4.36 
  -1  -6   4   48.86    6.51 
   1  -6  -4   51.78    5.34 
  -1  -6   4   48.09    4.35 
   1  -6  -4   47.15    6.38 
  -1  -6   4   43.06    5.13 
  -1   6   4   48.23    6.71 
  -1   6   4   58.12    5.09 
   1   6  -4   58.60    5.87 
   1   6  -4   49.72    4.72 
   1   6  -4   53.93    4.36 
  -1   6   4   52.38    5.29 
  -1   6   4   51.70    5.27 
   1   6  -4   54.23    4.96 
  -1   6   4   50.22    4.77 
   1   6  -4   55.22    4.58 
   0  -6  -4   20.75    3.21 
   0  -6  -4   18.71    3.83 
   0  -6   4   16.71    3.13 
   0  -6  -4   18.76    2.86 
   0  -6   4   16.94    2.59 
   0  -6   4   15.71    2.60 
   0  -6   4   10.78    3.57 
   0   6   4   16.01    2.94 
   0   6   4   19.31    4.36 
   0   6  -4   15.35    2.78 
   0   6  -4   13.71    2.89 
   0   6  -4   15.15    3.45 
   0   6   4   16.19    2.69 
   0   6   4   21.47    3.35 
   0   6  -4   13.04    2.23 
   0   6  -4   14.25    2.55 
   1  -6   4   27.19    3.83 
  -1  -6  -4   34.67    4.13 
   1  -6   4   28.73    3.99 
   1  -6   4   31.18    5.00 
   1  -6   4   36.11    4.12 
  -1  -6  -4   33.87    4.47 
  -1  -6  -4   28.01    3.59 
   1   6   4   28.61    3.66 
  -1   6  -4   28.44    4.26 
   1   6   4   23.49    3.07 
   1   6   4   28.49    3.51 
  -1   6  -4   25.47    3.23 
  -1   6  -4   27.52    3.44 
   1   6   4   22.15    4.54 
  -1   6  -4   19.28    3.41 
  -2  -6  -4   57.26    6.15 
   2  -6   4   55.87    5.44 
   2  -6   4   54.92    5.28 
   2  -6   4   58.95    7.74 
  -2  -6  -4   52.36    5.04 
  -2  -6  -4   50.38    5.62 
  -2   6  -4   60.62    5.48 
  -2   6  -4   62.48    6.92 
  -2   6  -4   63.99    4.48 
   2   6   4   64.46    5.17 
   2   6   4   64.60    5.17 
  -2   6  -4   64.63    6.01 
   2   6   4   60.09    6.99 
   3  -6   4   14.97    2.73 
  -3  -6  -4   12.87    2.53 
   3  -6   4   15.25    3.21 
  -3  -6  -4    9.92    3.47 
  -3  -6  -4   13.57    3.09 
   3  -6   4   11.92    3.33 
   3   6   4   15.22    2.54 
   3   6   4   13.38    2.44 
   3   6   4   13.93    4.28 
  -3   6  -4   18.13    4.21 
  -3   6  -4   13.09    2.34 
  -3   6  -4   13.51    3.42 
  -3   6  -4   10.10    2.77 
   4  -6   4   31.75    3.65 
   4  -6   4   26.81    5.90 
   4  -6   4   28.62    4.30 
  -4  -6  -4   28.08    4.06 
  -4  -6  -4   39.19    5.37 
  -4  -6  -4   23.70    3.12 
   4   6   4   29.52    4.01 
   4   6   4   27.27    5.53 
   4   6   4   23.86    3.07 
  -4   6  -4   31.24    5.07 
  -4   6  -4   26.31    4.67 
  -4   6  -4   20.26    3.70 
  -4   6  -4   31.15    3.87 
   5  -6   4   13.28    3.07 
  -5  -6  -4    8.48    3.37 
   5  -6   4   16.69    4.36 
   5  -6   4    9.26    5.51 
  -5  -6  -4   13.78    2.62 
  -5   6  -4   13.41    4.42 
   5   6   4   10.84    5.88 
  -5   6  -4   10.83    2.81 
   5   6   4   11.20    2.60 
  -5   6  -4   18.82    4.22 
   6  -6   4    9.38    3.26 
   6  -6   4    6.35    6.72 
  -6  -6  -4    9.75    2.64 
   6  -6   4   11.09    4.31 
  -6  -6  -4    8.74    3.76 
  -6   6  -4   13.74    5.37 
  -6   6  -4    9.44    4.15 
   6   6   4    4.80    2.83 
   5  -7  -4   17.42    4.14 
  -5  -7   4   17.36    2.76 
   5  -7  -4   19.43    6.79 
   5  -7  -4   13.87    4.21 
  -5   7   4    9.76    4.22 
  -5   7   4   18.64    6.13 
   5   7  -4   16.78    2.77 
   4  -7  -4   32.27    4.94 
  -4  -7   4   33.12    4.53 
   4  -7  -4   34.69    7.47 
   4  -7  -4   34.48    4.81 
  -4   7   4   28.58    4.57 
   4   7  -4   33.19    4.54 
  -4   7   4   33.71    5.59 
   3  -7  -4   15.04    3.66 
   3  -7  -4   24.44    6.68 
  -3  -7   4   21.99    5.31 
  -3  -7   4   17.21    2.97 
  -3   7   4   17.06    4.60 
   3   7  -4   28.23    3.67 
  -3   7   4   22.89    3.96 
   3   7  -4   23.86    3.51 
  -2  -7   4   12.87    2.93 
   2  -7  -4    1.29    4.21 
   2  -7  -4   13.76    5.43 
  -2  -7   4   13.78    4.92 
   2  -7  -4   13.84    3.68 
   2   7  -4   15.28    3.45 
  -2   7   4   19.37    3.77 
   2   7  -4   16.76    3.42 
  -2   7   4   12.13    4.05 
   2   7  -4   20.14    3.19 
   1  -7  -4   23.76    5.73 
  -1  -7   4   15.04    3.07 
  -1  -7   4   16.59    5.20 
   1  -7  -4   16.22    4.81 
   1  -7  -4   14.44    3.27 
  -1   7   4   14.59    3.97 
   1   7  -4   16.45    3.24 
  -1   7   4   12.41    5.93 
  -1   7   4   20.92    3.73 
   1   7  -4   13.76    3.67 
   1   7  -4   18.98    4.80 
   1   7  -4   16.06    3.27 
   0  -7  -4   31.57    5.93 
   0  -7   4   31.94    6.25 
   0  -7   4   38.23    5.00 
   0  -7  -4   31.08    4.32 
   0   7   4   30.06    4.41 
   0   7  -4   31.50    4.15 
   0   7   4   25.10    6.35 
   0   7  -4   38.05    5.86 
   0   7  -4   29.20    4.55 
   0   7   4   26.67    3.92 
   0   7  -4   40.03    5.13 
   1  -7   4   24.84    4.51 
   1  -7   4   24.98    6.16 
   1  -7   4   26.76    4.22 
  -1  -7  -4   23.96    3.99 
  -1  -7  -4   24.65    4.36 
  -1  -7  -4   23.06    5.39 
  -1   7  -4   25.65    4.45 
  -1   7  -4   26.23    3.58 
  -1   7  -4   39.38    6.01 
   1   7   4   29.49    3.81 
   1   7   4   30.86    4.36 
  -1   7  -4   32.06    4.33 
   1   7   4   31.15    6.24 
   2  -7   4    2.71    5.40 
   2  -7   4   -1.75    3.01 
  -2  -7  -4    0.18    4.21 
  -2  -7  -4    4.08    2.62 
   2  -7   4    1.82    3.41 
   2   7   4   -2.30    5.58 
  -2   7  -4   -1.26    3.20 
  -2   7  -4    1.19    3.68 
  -2   7  -4   -1.82    2.52 
   2   7   4    6.45    2.84 
  -2   7  -4   -4.48    4.89 
  -3  -7  -4   14.52    4.72 
   3  -7   4   10.99    3.64 
  -3  -7  -4    9.07    3.12 
   3  -7   4   12.28    6.57 
  -3   7  -4   16.03    4.48 
  -3   7  -4   13.01    4.00 
   3   7   4   17.04    3.37 
   3   7   4   15.62    3.23 
   4  -7   4   16.19    4.26 
   4  -7   4   12.53    7.41 
  -4  -7  -4   16.53    3.37 
   4  -7   4   21.37    3.98 
   4   7   4    8.78    3.30 
   4   7   4   11.61    3.17 
  -4   7  -4    8.83    4.39 
  -4   7  -4   16.39    5.11 
  11   0  -5    7.01    3.66 
  11   0  -5    7.02    2.70 
 -11   0   5    3.70    2.20 
  10   0  -5    0.66    2.08 
 -10   0   5    2.95    1.74 
  10   0  -5    0.48    2.62 
  10   0  -5    2.60    2.21 
  10   0  -5   -3.46    1.82 
 -10   0   5    1.37    2.47 
 -10   0   5    1.13    1.29 
   9   0  -5    7.02    1.97 
  -9   0   5    6.40    2.20 
   9   0  -5    7.99    1.98 
   9   0  -5    7.88    1.84 
  -9   0   5    7.27    1.49 
   9   0  -5    8.04    1.66 
  -8   0   5   94.84    5.53 
  -8   0   5   93.64    5.28 
   8   0  -5   94.39    5.38 
   8   0  -5   91.79    5.51 
   8   0  -5   95.12    5.82 
  -8   0   5   89.91    5.87 
   8   0  -5   91.82    5.71 
   8   0  -5   93.50    6.14 
   7   0  -5   48.73    3.46 
   7   0  -5   46.56    3.12 
  -7   0   5   50.01    3.65 
  -7   0   5   51.02    3.09 
   7   0  -5   54.37    3.62 
   7   0  -5   49.73    3.27 
   7   0  -5   46.28    3.81 
  -7   0   5   47.02    3.29 
   6   0  -5   21.11    2.04 
   6   0  -5   19.40    1.68 
  -6   0   5   19.32    1.76 
   6   0  -5   17.21    2.23 
  -6   0   5   20.27    1.61 
  -6   0   5   18.73    2.11 
   6   0  -5   22.13    1.85 
   5   0  -5  167.89    8.25 
  -5   0   5  163.44    8.39 
   5   0  -5  163.57    8.50 
   5   0  -5  160.16    8.45 
   5   0  -5  166.67    8.36 
  -5   0   5  176.23    8.59 
   5   0  -5  166.47    8.49 
  -5   0   5  164.73    8.40 
  -4   0   5  185.30    9.10 
   4   0  -5  180.36    9.18 
  -4   0   5  183.12    9.06 
   4   0  -5  187.66    9.17 
  -4   0   5  190.30    9.21 
   4   0  -5  184.13    9.23 
  -4   0   5  187.36    9.18 
   4   0  -5  179.22    9.16 
   4   0  -5  188.59    9.01 
   3   0  -5  113.64    5.64 
   3   0  -5  113.76    5.68 
  -3   0   5  109.31    5.62 
  -3   0   5  113.87    5.66 
   3   0  -5  109.69    5.56 
  -3   0   5  114.62    5.63 
   3   0  -5  112.32    5.67 
   3   0  -5  112.46    5.69 
   2   0  -5  119.78    5.81 
  -2   0   5  118.73    5.78 
  -2   0   5  115.73    5.72 
   2   0  -5  115.59    5.82 
   2   0  -5  117.26    5.73 
  -2   0   5  119.34    5.82 
   2   0  -5  115.37    5.77 
   2   0  -5  115.46    5.73 
  -1   0   5    3.80    0.45 
   1   0  -5    3.20    0.50 
   1   0  -5    3.11    0.49 
  -1   0   5    3.29    0.43 
  -1   0   5    3.56    0.55 
   1   0  -5    3.76    0.48 
   1   0  -5    3.94    0.47 
  -1   0   5    3.42    0.45 
   1   0  -5    2.75    0.39 
  -1   0   5    3.51    0.46 
   0   0  -5  234.96   11.41 
   0   0  -5  238.37   11.66 
   0   0   5  239.34   11.26 
   0   0  -5  243.36   11.34 
   0   0   5  231.22   11.66 
   0   0   5  240.72   11.42 
   0   0   5  238.15   11.64 
   0   0  -5  242.81   11.63 
  -1   0  -5   67.01    3.85 
  -1   0  -5   73.43    3.89 
   1   0   5   73.84    3.91 
  -1   0  -5   72.73    3.85 
   1   0   5   73.98    3.90 
   1   0   5   76.63    3.91 
  -2   0  -5   19.46    1.39 
  -2   0  -5   17.73    1.58 
   2   0   5   17.16    1.45 
   2   0   5   16.82    1.44 
   2   0   5   17.14    1.40 
  -2   0  -5   17.24    1.41 
  -3   0  -5  190.38   10.00 
   3   0   5  190.09   10.04 
  -3   0  -5  197.84   10.05 
   3   0   5  202.88    9.98 
   3   0   5  199.08   10.07 
  -3   0  -5  204.57   10.00 
  -4   0  -5  281.16   14.22 
   4   0   5  286.32   14.46 
   4   0   5  282.79   14.05 
  -4   0  -5  296.51   14.42 
   4   0   5  296.37   14.29 
  -4   0  -5  279.15   14.39 
   4   0   5  284.43   14.44 
   5   0   5  190.69    9.60 
   5   0   5  188.70    9.87 
  -5   0  -5  185.16    9.83 
  -5   0  -5  186.71    9.86 
   5   0   5  181.90    9.83 
  -5   0  -5  186.89    9.80 
  -6   0  -5    0.12    1.22 
  -6   0  -5    0.87    1.07 
   6   0   5    0.57    1.13 
   6   0   5   -0.01    0.91 
  -6   0  -5    0.55    0.86 
   6   0   5    1.59    1.29 
   6   0   5    0.23    1.19 
  -7   0  -5    3.93    1.51 
   7   0   5    4.17    1.44 
   7   0   5    4.81    1.87 
  -7   0  -5    4.04    1.93 
   7   0   5    4.01    1.56 
  -8   0  -5    0.55    1.52 
  -8   0  -5   -0.48    1.59 
   8   0   5    0.58    2.09 
  -8   0  -5   -1.02    1.83 
   8   0   5    1.25    2.22 
   8   0   5    0.96    1.52 
   8   0   5    0.53    1.93 
   9   0   5  100.37    7.57 
   9   0   5   92.93    6.48 
  -9   0  -5   91.02    6.53 
   9   0   5   83.82    7.26 
  -9   0  -5   94.32    6.52 
   9   0   5   88.87    7.05 
  -9   0  -5   95.97    7.41 
  10   0   5   12.40    4.14 
  10   0   5   12.67    3.87 
 -10   0  -5   11.81    4.19 
 -10   0  -5    4.87    2.73 
 -10   0  -5    8.02    3.22 
  10   0   5    7.08    3.88 
  10   0   5    9.75    2.88 
  11  -1  -5   11.76    3.43 
  11  -1  -5   15.53    4.67 
  11  -1  -5   11.50    3.56 
 -11  -1   5   17.05    2.57 
 -11   1   5   18.29    3.03 
  11   1  -5   17.70    3.35 
  11   1  -5   13.19    3.87 
 -11   1   5   16.90    4.35 
  10  -1  -5   27.50    4.32 
 -10  -1   5   27.54    2.83 
  10  -1  -5   28.56    3.70 
 -10  -1   5   29.88    3.48 
  10  -1  -5   31.58    4.28 
  10  -1  -5   26.87    3.51 
 -10  -1   5   32.78    3.35 
  10   1  -5   23.71    3.56 
  10   1  -5   24.26    3.08 
 -10   1   5   21.77    4.07 
 -10   1   5   23.46    2.96 
 -10   1   5   24.84    3.24 
  10   1  -5   24.98    2.91 
  10   1  -5   22.58    3.15 
  10   1  -5   24.62    3.03 
   9  -1  -5    3.71    1.62 
   9  -1  -5    5.30    2.17 
  -9  -1   5    6.13    1.43 
   9  -1  -5    4.53    2.58 
   9  -1  -5    3.32    1.90 
  -9  -1   5    5.50    1.95 
   9  -1  -5    7.81    2.23 
  -9   1   5    5.14    1.68 
  -9   1   5    4.49    1.43 
  -9   1   5    5.46    2.47 
   9   1  -5    5.39    1.89 
   9   1  -5    6.67    1.83 
   9   1  -5    3.95    1.62 
   9   1  -5    7.18    1.71 
   9   1  -5    6.23    2.23 
   8  -1  -5   11.39    2.52 
  -8  -1   5   13.87    1.90 
   8  -1  -5   11.46    2.12 
   8  -1  -5   12.59    1.79 
   8  -1  -5   12.09    1.98 
   8   1  -5    9.81    1.81 
  -8   1   5    7.95    2.26 
  -8   1   5   10.36    1.75 
   8   1  -5   10.60    1.62 
   8   1  -5    9.69    1.52 
  -8   1   5   10.65    1.55 
   8   1  -5    9.58    1.47 
   8   1  -5    7.57    1.93 
   7  -1  -5  123.68    7.17 
   7  -1  -5  126.99    7.22 
   7  -1  -5  122.73    7.49 
  -7  -1   5  128.68    6.89 
   7  -1  -5  124.35    7.78 
  -7  -1   5  124.99    6.95 
   7  -1  -5  127.73    7.41 
  -7   1   5  140.91    7.39 
   7   1  -5  137.36    7.01 
  -7   1   5  136.29    7.70 
   7   1  -5  135.64    6.96 
   7   1  -5  132.87    7.29 
   7   1  -5  139.74    7.00 
   7   1  -5  135.98    7.21 
  -7   1   5  143.29    7.47 
  -6  -1   5  134.82    7.59 
  -6  -1   5  156.71    7.70 
   6  -1  -5  150.32    8.02 
   6  -1  -5  151.96    8.27 
   6  -1  -5  155.62    8.04 
   6  -1  -5  154.29    8.15 
   6  -1  -5  151.74    8.52 
   6   1  -5  157.47    7.76 
  -6   1   5  158.85    8.19 
   6   1  -5  152.68    7.76 
   6   1  -5  152.39    8.00 
  -6   1   5  158.73    8.21 
   6   1  -5  134.61    7.57 
  -6   1   5  155.56    8.04 
  -6   1   5  161.18    8.05 
   6   1  -5  153.89    7.82 
  -6   1   5  153.24    8.28 
   5  -1  -5  247.57   12.34 
  -5  -1   5  270.82   12.09 
   5  -1  -5  265.73   12.49 
  -5  -1   5  250.61   12.02 
   5  -1  -5  252.55   12.62 
   5  -1  -5  261.06   12.35 
   5  -1  -5  260.15   12.69 
   5   1  -5  233.49   12.12 
   5   1  -5  228.95   11.81 
  -5   1   5  248.29   12.45 
  -5   1   5  241.62   12.45 
   5   1  -5  236.63   12.11 
   5   1  -5  241.39   12.20 
  -5   1   5  240.97   12.46 
  -5   1   5  247.05   12.25 
   5   1  -5  242.27   11.94 
  -5   1   5  245.22   12.51 
   4  -1  -5    6.23    1.06 
  -4  -1   5    6.15    0.73 
   4  -1  -5    4.80    1.24 
   4  -1  -5    4.29    0.90 
   4  -1  -5    6.71    0.92 
   4  -1  -5    6.29    1.08 
  -4   1   5    9.35    1.10 
   4   1  -5    6.47    0.65 
   4   1  -5    8.50    0.66 
  -4   1   5    7.11    1.19 
  -4   1   5    8.19    1.28 
   4   1  -5    7.69    0.65 
  -4   1   5    8.22    1.12 
   4   1  -5    8.22    0.81 
   4   1  -5    8.98    1.13 
  -4   1   5    7.69    1.06 
   3  -1  -5   17.44    1.34 
   3  -1  -5   16.52    1.77 
   3  -1  -5   17.67    1.48 
  -3   1   5   12.26    1.18 
  -3   1   5   12.70    1.26 
  -3   1   5   11.76    1.49 
  -3   1   5   11.39    1.46 
   3   1  -5   11.14    1.10 
  -3   1   5   12.63    1.27 
   2  -1  -5  363.09   16.73 
   2  -1  -5  371.73   17.19 
   2  -1  -5  359.54   16.95 
   2  -1  -5  382.54   17.15 
   2  -1  -5  367.96   16.84 
  -2   1   5  329.22   16.89 
   2   1  -5  315.32   16.72 
  -2   1   5  347.83   16.68 
  -2   1   5  352.86   17.10 
  -2   1   5  344.03   16.79 
   2   1  -5  342.29   16.49 
  -2   1   5  329.47   17.14 
   1  -1  -5    8.94    0.89 
   1  -1  -5   10.38    1.00 
  -1  -1   5   10.12    0.69 
   1  -1  -5   10.37    0.95 
   1  -1  -5    9.40    0.97 
   1   1  -5    8.58    0.66 
  -1   1   5    8.14    1.04 
  -1   1   5    7.31    0.86 
  -1   1   5    6.16    0.98 
  -1   1   5    7.19    0.84 
   1   1  -5    7.83    0.63 
  -1   1   5    7.90    0.95 
   1   1  -5    7.89    0.73 
   1   1  -5    7.26    0.52 
   0  -1  -5    3.14    0.70 
   0  -1   5    2.79    0.43 
   0  -1  -5    2.67    0.63 
   0  -1  -5    2.43    0.50 
   0  -1   5    2.39    0.49 
   0  -1  -5    2.42    0.57 
   0  -1   5    2.31    0.49 
   0   1   5    4.42    0.72 
   0   1   5    4.75    0.84 
   0   1   5    2.98    0.49 
   0   1   5    3.78    0.60 
   0   1   5    3.90    0.58 
   0   1  -5    4.71    0.59 
  -1  -1  -5  106.91    4.80 
  -1  -1  -5  101.80    4.72 
   1  -1   5  105.18    4.69 
   1  -1   5  105.83    4.73 
  -1  -1  -5  106.17    4.77 
   1   1   5   79.25    4.69 
  -1   1  -5   74.47    4.61 
   1   1   5   76.20    4.50 
   1   1   5   79.42    4.75 
  -1   1  -5   74.52    4.58 
   1   1   5   75.72    4.58 
  -1   1  -5   76.85    4.64 
   2  -1   5  610.02   31.12 
   2  -1   5  626.15   32.24 
  -2  -1  -5  622.83   31.28 
  -2  -1  -5  646.60   31.37 
  -2  -1  -5  622.45   32.11 
   2  -1   5  635.09   32.14 
  -2  -1  -5  615.12   32.11 
   2  -1   5  631.82   31.37 
   2   1   5  718.76   31.56 
   2   1   5  691.94   32.12 
  -2   1  -5  732.69   32.24 
   2   1   5  710.56   32.26 
  -2   1  -5  733.97   32.28 
  -2   1  -5  707.89   31.53 
  -3  -1  -5  170.23    8.38 
  -3  -1  -5  174.19    8.47 
   3  -1   5  174.06    8.52 
   3  -1   5  171.46    8.65 
   3  -1   5  179.56    8.51 
   3  -1   5  175.42    8.17 
  -3  -1  -5  177.29    8.32 
  -3  -1  -5  171.90    8.48 
  -3   1  -5  147.64    8.48 
   3   1   5  149.09    8.41 
   3   1   5  146.49    8.34 
   3   1   5  151.47    8.47 
  -3   1  -5  149.83    8.45 
  -3   1  -5  151.58    8.50 
   4  -1   5   84.90    5.00 
   4  -1   5   86.29    4.89 
   4  -1   5   82.87    4.67 
  -4  -1  -5   82.94    4.80 
  -4  -1  -5   83.43    4.78 
  -4  -1  -5   85.31    4.85 
  -4  -1  -5   84.12    4.92 
   4  -1   5   89.06    5.14 
  -4   1  -5   79.30    5.03 
   4   1   5   85.80    5.02 
  -4   1  -5   81.28    4.95 
   4   1   5   84.96    4.98 
   4   1   5   84.59    4.81 
  -4   1  -5   84.10    4.87 
   5  -1   5   94.94    5.84 
  -5  -1  -5  104.97    5.66 
  -5  -1  -5   99.22    5.56 
  -5  -1  -5   98.40    5.48 
   5  -1   5   98.05    5.58 
   5  -1   5  101.35    5.42 
  -5   1  -5   90.46    5.49 
  -5   1  -5   87.45    5.60 
  -5   1  -5   87.18    5.82 
   5   1   5   92.15    5.60 
   5   1   5   91.12    5.49 
   5   1   5   94.19    5.79 
  -6  -1  -5   42.88    3.44 
  -6  -1  -5   47.81    3.65 
   6  -1   5   48.54    3.94 
  -6  -1  -5   46.67    3.81 
   6  -1   5   46.50    3.58 
   6  -1   5   41.50    4.26 
   6  -1   5   46.17    4.01 
   6  -1   5   43.99    3.58 
   6   1   5   63.47    4.30 
  -6   1  -5   55.80    3.85 
   6   1   5   52.01    3.69 
  -6   1  -5   55.85    3.71 
  -6   1  -5   58.79    4.45 
   6   1   5   52.14    3.84 
   7  -1   5   -1.00    2.02 
   7  -1   5    0.98    1.62 
   7  -1   5    0.05    1.67 
   7  -1   5   -0.01    1.38 
   7  -1   5   -0.23    1.31 
  -7  -1  -5   -1.25    1.63 
  -7  -1  -5   -0.01    1.15 
  -7  -1  -5    0.04    1.33 
   7   1   5    0.67    1.29 
  -7   1  -5    0.92    1.49 
  -7   1  -5   -0.23    1.26 
  -7   1  -5    1.62    1.81 
   7   1   5    1.60    1.99 
   8  -1   5    5.10    2.70 
   8  -1   5    7.84    2.10 
   8  -1   5    4.93    2.42 
  -8  -1  -5    5.90    1.79 
  -8  -1  -5    5.46    2.29 
  -8  -1  -5    7.73    2.01 
  -8  -1  -5    7.06    1.96 
   8  -1   5    5.81    2.17 
   8  -1   5    2.80    1.84 
   8   1   5   -0.29    1.81 
  -8   1  -5    4.45    2.00 
   8   1   5    6.43    2.16 
   8   1   5    7.29    2.67 
   8   1   5    6.63    1.89 
  -8   1  -5    6.27    2.75 
  -8   1  -5    7.14    2.16 
   9  -1   5    6.83    3.36 
  -9  -1  -5    9.49    2.93 
   9  -1   5    6.39    3.21 
  -9  -1  -5    5.83    2.50 
  -9  -1  -5    6.27    2.04 
   9  -1   5    8.69    2.39 
   9  -1   5   12.92    3.71 
   9   1   5    8.58    2.57 
  -9   1  -5    9.37    2.46 
   9   1   5    3.36    3.26 
   9   1   5    8.20    2.27 
  -9   1  -5    3.95    2.15 
  -9   1  -5    8.35    3.60 
 -10  -1  -5   34.88    4.93 
  10  -1   5   35.48    4.88 
  10  -1   5   38.93    5.98 
  10  -1   5   39.71    5.46 
  10  -1   5   36.76    5.10 
 -10  -1  -5   35.92    5.38 
  10   1   5   50.55    5.31 
  10   1   5   41.85    5.35 
 -10   1  -5   41.97    5.97 
  10   1   5   50.79    6.38 
  10   1   5   39.35    4.82 
 -10   1  -5   41.42    5.31 
  11  -2  -5    4.65    3.30 
  11  -2  -5   10.91    4.11 
  11  -2  -5    5.68    4.71 
 -11  -2   5    9.58    2.17 
 -11   2   5    4.92    2.85 
  11   2  -5    6.19    3.32 
  11   2  -5    2.11    2.74 
 -11   2   5   -7.57    4.34 
  10  -2  -5    5.75    2.90 
  10  -2  -5    0.31    2.57 
 -10  -2   5    2.46    2.10 
  10  -2  -5    3.88    2.82 
 -10  -2   5    0.27    1.34 
  10  -2  -5    0.13    3.33 
 -10  -2   5    4.01    1.65 
  10   2  -5   -1.11    2.35 
  10   2  -5    2.48    1.76 
  10   2  -5    2.00    2.12 
  10   2  -5    0.82    2.20 
 -10   2   5    2.98    2.15 
  10   2  -5    1.19    2.18 
 -10   2   5   -1.84    3.33 
   9  -2  -5   34.20    4.65 
   9  -2  -5   31.41    4.31 
  -9  -2   5   38.26    2.87 
   9  -2  -5   37.04    4.28 
  -9  -2   5   37.38    3.48 
   9  -2  -5   38.96    4.69 
  -9  -2   5   34.61    3.32 
   9   2  -5   29.81    3.00 
   9   2  -5   30.61    3.48 
   9   2  -5   30.67    3.49 
  -9   2   5   32.38    4.30 
  -9   2   5   35.98    3.90 
   9   2  -5   38.00    3.86 
   9   2  -5   34.67    3.77 
   8  -2  -5   26.67    3.04 
   8  -2  -5   29.94    4.03 
   8  -2  -5   35.54    3.83 
  -8  -2   5   30.29    2.71 
   8  -2  -5   34.61    3.98 
  -8  -2   5   31.05    2.41 
   8  -2  -5   29.44    3.50 
   8   2  -5   31.18    2.91 
   8   2  -5   34.27    3.26 
   8   2  -5   31.49    2.82 
  -8   2   5   34.37    3.38 
  -8   2   5   27.59    3.72 
  -8   2   5   33.77    3.43 
   8   2  -5   29.29    2.98 
   8   2  -5   29.55    2.46 
   7  -2  -5   45.87    4.01 
   7  -2  -5   45.53    4.63 
   7  -2  -5   45.93    3.77 
  -7  -2   5   48.52    2.74 
   7  -2  -5   44.56    3.44 
   7  -2  -5   44.92    3.95 
  -7  -2   5   42.60    2.65 
  -7   2   5   46.22    3.67 
   7   2  -5   45.13    3.08 
  -7   2   5   48.85    3.67 
   7   2  -5   43.02    3.06 
  -7   2   5   40.27    4.36 
   7   2  -5   43.56    2.81 
   7   2  -5   46.52    2.98 
  -7   2   5   45.60    4.19 
   7   2  -5   45.93    3.50 
  -6  -2   5    5.29    0.68 
  -6  -2   5    4.93    0.87 
   6  -2  -5    4.83    1.47 
  -6  -2   5    5.17    0.90 
   6  -2  -5    4.42    1.34 
   6  -2  -5    4.31    1.91 
   6  -2  -5    4.94    1.43 
   6  -2  -5    5.59    1.16 
  -6  -2   5    5.03    0.63 
  -6   2   5    4.93    1.26 
  -6   2   5    2.63    1.14 
  -6   2   5    3.07    1.21 
   6   2  -5    3.04    1.11 
   6   2  -5    3.18    0.87 
  -6   2   5    2.87    1.61 
   6   2  -5    3.73    0.90 
   6   2  -5    3.62    0.70 
  -6   2   5    5.93    1.57 
   6   2  -5    3.49    0.78 
   5  -2  -5  123.50    6.80 
   5  -2  -5  124.10    6.97 
   5  -2  -5  120.38    7.05 
   5  -2  -5  119.64    6.78 
  -5  -2   5  122.06    6.08 
   5  -2  -5  121.77    7.39 
  -5  -2   5  124.94    6.05 
  -5   2   5  130.88    7.21 
  -5   2   5  123.77    6.65 
   5   2  -5  116.77    6.60 
  -5   2   5  122.16    6.88 
  -5   2   5  130.70    7.25 
   5   2  -5  121.89    6.05 
  -5   2   5  124.80    6.92 
   5   2  -5  133.53    6.26 
  -4  -2   5  277.86   12.68 
   4  -2  -5  277.26   13.45 
   4  -2  -5  272.55   13.67 
   4  -2  -5  272.78   13.62 
  -4  -2   5  267.11   12.71 
   4  -2  -5  265.61   13.93 
   4  -2  -5  268.72   13.86 
  -4   2   5  269.56   13.74 
  -4   2   5  265.16   13.69 
  -4   2   5  274.96   13.82 
  -4   2   5  274.75   13.34 
   4   2  -5  280.32   13.10 
   4   2  -5  256.34   13.01 
  -4   2   5  265.43   13.73 
   3  -2  -5  245.99   11.90 
   3  -2  -5  251.36   12.06 
   3  -2  -5  230.98   11.62 
  -3  -2   5  254.10   11.01 
  -3  -2   5  240.35   11.02 
   3  -2  -5  242.27   11.86 
   3  -2  -5  245.14   12.20 
  -3   2   5  221.43   11.50 
   3   2  -5  235.11   11.34 
   3   2  -5  219.53   11.27 
  -3   2   5  218.61   11.83 
   3   2  -5  219.60   11.00 
  -3   2   5  227.87   11.96 
  -3   2   5  231.52   11.95 
  -3   2   5  229.90   11.90 
  -2  -2   5    6.52    0.60 
   2  -2  -5    5.97    1.35 
  -2  -2   5    6.42    0.78 
   2  -2  -5    7.24    1.09 
   2  -2  -5    7.02    1.10 
  -2  -2   5    6.83    0.70 
   2  -2  -5    6.58    1.00 
   2  -2  -5    7.94    1.28 
   2   2  -5    8.42    0.69 
   2   2  -5    7.20    0.81 
  -2   2   5    6.29    1.23 
  -2   2   5    6.69    1.04 
  -2   2   5    6.57    1.00 
   2   2  -5    8.14    0.82 
  -2   2   5    8.55    1.12 
   2   2  -5    7.71    0.73 
  -2   2   5    6.50    1.18 
  -1  -2   5   71.04    3.82 
   1  -2  -5   70.05    4.42 
  -1  -2   5   69.22    3.89 
   1  -2  -5   69.50    4.07 
   1  -2  -5   69.99    4.23 
  -1  -2   5   71.75    3.77 
   1  -2  -5   67.42    4.13 
   1  -2  -5   69.88    4.03 
  -1  -2   5   68.49    3.72 
   1   2  -5   74.76    3.81 
   1   2  -5   72.37    3.83 
   1   2  -5   74.08    3.62 
  -1   2   5   69.78    3.95 
  -1   2   5   75.36    4.28 
   1   2  -5   71.70    3.77 
  -1   2   5   77.22    4.11 
  -1   2   5   74.08    4.47 
  -1   2   5   73.22    4.17 
   0  -2  -5   16.32    2.07 
   0  -2   5   15.85    1.91 
   0   2   5   25.51    1.98 
   0   2  -5   28.20    1.81 
   0   2  -5   28.52    1.89 
   0   2   5   28.78    2.42 
   0   2   5   25.70    1.85 
   0   2   5   28.73    2.04 
   1  -2   5  148.18    7.18 
  -1  -2  -5  141.43    7.38 
  -1  -2  -5  140.39    7.30 
   1  -2   5  148.84    7.50 
   1  -2   5  146.10    7.20 
   1  -2   5  147.43    6.77 
   1  -2   5  142.06    7.32 
  -1  -2  -5  143.18    7.28 
  -1  -2  -5  144.87    7.32 
   1   2   5  137.71    7.17 
  -1   2  -5  134.78    7.23 
  -1   2  -5  134.99    6.68 
  -1   2  -5  129.10    7.20 
  -1   2  -5  141.19    7.22 
   1   2   5  130.78    7.11 
   1   2   5  130.04    7.45 
   1   2   5  129.96    7.31 
   1   2   5  127.48    7.16 
   2  -2   5  102.45    6.01 
   2  -2   5  107.67    5.61 
  -2  -2  -5  102.03    5.57 
  -2  -2  -5  109.34    5.63 
   2  -2   5  107.46    5.63 
   2  -2   5  101.35    5.16 
  -2  -2  -5   98.45    5.60 
  -2  -2  -5  109.07    5.70 
   2  -2   5   99.93    5.74 
   2   2   5  100.14    5.43 
  -2   2  -5   95.46    5.73 
  -2   2  -5  100.60    5.12 
   2   2   5   97.07    5.49 
  -2   2  -5  102.31    5.62 
  -2   2  -5  101.51    5.69 
   2   2   5   99.93    5.67 
   2   2   5  104.66    5.91 
   3  -2   5  147.14    7.84 
  -3  -2  -5  145.59    7.81 
   3  -2   5  147.45    8.34 
  -3  -2  -5  139.35    7.76 
   3  -2   5  141.95    7.38 
   3  -2   5  145.74    8.07 
   3  -2   5  135.51    7.76 
  -3  -2  -5  142.33    7.74 
  -3  -2  -5  142.62    7.74 
   3   2   5  157.48    7.77 
   3   2   5  157.50    8.12 
  -3   2  -5  147.58    7.98 
  -3   2  -5  149.52    7.37 
  -3   2  -5  157.96    8.17 
   3   2   5  151.70    7.93 
   4  -2   5  302.01   15.61 
  -4  -2  -5  330.42   15.57 
   4  -2   5  322.48   16.01 
   4  -2   5  322.28   15.04 
  -4  -2  -5  334.05   15.40 
  -4  -2  -5  319.91   15.47 
   4  -2   5  323.38   15.42 
   4  -2   5  320.36   15.89 
  -4  -2  -5  317.16   15.24 
  -4   2  -5  272.49   15.48 
  -4   2  -5  290.39   14.94 
   4   2   5  293.73   15.53 
   4   2   5  285.97   15.57 
  -4   2  -5  293.43   15.68 
   4   2   5  279.87   15.31 
  -5  -2  -5   81.40    5.16 
  -5  -2  -5   77.78    5.28 
   5  -2   5   79.95    5.30 
   5  -2   5   75.53    5.66 
  -5  -2  -5   78.18    5.30 
   5  -2   5   84.87    5.55 
  -5  -2  -5   86.42    5.37 
   5  -2   5   77.05    5.94 
   5  -2   5   78.34    5.12 
  -5   2  -5   99.35    5.44 
  -5   2  -5  103.28    6.15 
   5   2   5  103.22    5.98 
   5   2   5  103.91    5.62 
  -5   2  -5  106.38    5.78 
   5   2   5   97.39    5.25 
  -6  -2  -5   18.53    2.47 
  -6  -2  -5   18.96    2.33 
   6  -2   5   17.38    2.31 
  -6  -2  -5   14.46    2.07 
   6  -2   5   20.35    3.29 
   6  -2   5   23.86    3.04 
  -6  -2  -5   16.66    2.29 
   6  -2   5   18.98    2.60 
   6  -2   5   17.41    2.45 
   6   2   5   23.52    3.04 
   6   2   5   21.51    2.94 
  -6   2  -5   22.47    2.59 
  -6   2  -5   23.30    3.13 
   6   2   5   19.46    2.40 
  -6   2  -5   21.83    2.93 
   7  -2   5   19.99    2.91 
  -7  -2  -5   16.91    2.54 
  -7  -2  -5   14.98    2.35 
   7  -2   5   13.06    2.61 
   7  -2   5   17.09    2.45 
   7  -2   5   16.05    3.56 
  -7  -2  -5   15.90    2.07 
   7   2   5    9.25    1.87 
  -7   2  -5    9.88    2.94 
  -7   2  -5    9.17    1.90 
   7   2   5   10.46    2.74 
  -7   2  -5    8.83    2.13 
   8  -2   5   27.82    3.32 
  -8  -2  -5   21.89    3.18 
   8  -2   5   21.24    3.50 
  -8  -2  -5   20.11    2.97 
   8  -2   5   26.18    3.65 
   8  -2   5   17.79    4.27 
  -8  -2  -5   21.97    3.08 
   8   2   5   21.00    2.84 
   8   2   5   24.90    3.17 
  -8   2  -5   20.76    3.26 
  -8   2  -5   17.87    2.69 
   8   2   5   16.29    3.69 
  -8   2  -5   15.49    3.36 
   9  -2   5   48.32    5.51 
   9  -2   5   51.09    6.25 
  -9  -2  -5   46.95    4.75 
  -9  -2  -5   42.17    5.59 
   9  -2   5   45.28    6.30 
   9  -2   5   58.39    5.45 
  -9  -2  -5   51.07    5.60 
  -9   2  -5   40.36    5.27 
   9   2   5   48.34    5.81 
   9   2   5   45.13    5.01 
  -9   2  -5   39.68    5.38 
 -10  -2  -5   11.45    4.38 
 -10  -2  -5   17.11    3.16 
  10  -2   5   17.27    3.84 
  10  -2   5   13.35    4.12 
  10  -2   5   19.50    5.82 
 -10   2  -5   15.94    5.21 
  10   2   5   12.74    3.55 
  10   2   5   14.05    3.80 
 -10  -3   5    2.47    1.42 
  10  -3  -5   -1.52    3.22 
  10  -3  -5    3.49    4.52 
  10  -3  -5    1.34    3.66 
  10  -3  -5    2.43    2.96 
  10   3  -5    1.75    2.39 
  10   3  -5    2.48    2.50 
 -10   3   5    0.58    2.44 
  -9  -3   5   18.65    1.88 
  -9  -3   5   21.93    2.54 
   9  -3  -5   25.64    3.89 
   9  -3  -5   16.94    3.59 
   9  -3  -5   21.01    3.46 
  -9  -3   5   22.29    2.12 
  -9  -3   5   23.66    3.01 
   9  -3  -5   14.21    4.28 
   9   3  -5   16.18    2.37 
   9   3  -5   15.93    2.32 
   9   3  -5   15.22    2.66 
   9   3  -5   13.81    1.88 
  -9   3   5   16.28    3.00 
  -9   3   5   14.05    4.17 
  -9   3   5   13.31    2.93 
   8  -3  -5   47.95    6.14 
   8  -3  -5   52.36    5.20 
  -8  -3   5   47.56    3.54 
   8  -3  -5   47.46    4.88 
   8  -3  -5   45.38    5.27 
  -8  -3   5   50.81    3.83 
  -8  -3   5   51.02    3.08 
  -8  -3   5   47.19    3.03 
   8   3  -5   53.07    3.36 
  -8   3   5   49.49    4.35 
  -8   3   5   56.62    6.25 
   8   3  -5   53.39    4.38 
   8   3  -5   60.11    4.36 
   8   3  -5   58.39    3.71 
  -8   3   5   62.48    5.74 
   8   3  -5   54.69    3.71 
  -8   3   5   62.81    4.78 
  -8   3   5   49.87    4.64 
  -7  -3   5   42.26    2.93 
  -7  -3   5   45.09    3.19 
   7  -3  -5   45.42    4.04 
   7  -3  -5   45.46    4.39 
   7  -3  -5   43.41    4.57 
  -7  -3   5   41.70    2.60 
  -7  -3   5   48.34    2.63 
   7  -3  -5   47.60    5.43 
   7   3  -5   45.08    3.81 
   7   3  -5   51.36    3.17 
  -7   3   5   47.62    4.12 
   7   3  -5   43.88    3.42 
  -7   3   5   52.54    5.10 
  -7   3   5   45.62    3.99 
   6  -3  -5  147.46    8.45 
  -6  -3   5  135.62    6.89 
  -6  -3   5  130.79    6.85 
   6  -3  -5  147.36    8.29 
   6  -3  -5  145.70    9.02 
   6  -3  -5  132.66    7.91 
  -6  -3   5  134.03    7.05 
  -6  -3   5  144.09    6.87 
  -6   3   5  136.31    7.63 
   6   3  -5  147.01    7.25 
  -6   3   5  135.22    8.02 
   6   3  -5  140.96    7.22 
  -6   3   5  143.19    8.62 
   6   3  -5  131.33    6.98 
  -6   3   5  138.62    8.13 
   5  -3  -5   49.84    4.06 
   5  -3  -5   51.58    4.71 
   5  -3  -5   47.88    3.52 
  -5  -3   5   46.18    2.84 
   5  -3  -5   44.29    3.57 
  -5  -3   5   45.64    2.62 
  -5  -3   5   47.79    2.49 
  -5  -3   5   45.24    2.51 
   5   3  -5   49.61    2.92 
  -5   3   5   46.48    3.72 
  -5   3   5   46.59    3.33 
  -5   3   5   43.70    4.14 
   5   3  -5   45.31    2.57 
  -5   3   5   44.37    4.18 
  -5   3   5   45.32    3.63 
   5   3  -5   48.42    2.81 
   4  -3  -5   13.70    2.47 
  -4  -3   5   15.68    1.32 
   4  -3  -5   17.30    2.13 
   4  -3  -5   14.46    2.16 
  -4  -3   5   16.86    1.22 
  -4  -3   5   16.54    1.56 
   4  -3  -5   15.64    2.05 
  -4  -3   5   16.77    1.40 
   4  -3  -5   12.85    1.95 
   4   3  -5   21.08    1.27 
   4   3  -5   23.01    1.71 
  -4   3   5   22.45    2.89 
  -4   3   5   21.28    2.41 
   4   3  -5   20.86    1.53 
  -4   3   5   22.03    2.10 
  -4   3   5   20.37    2.29 
  -4   3   5   21.35    2.69 
   3  -3  -5  105.28    5.90 
  -3  -3   5   99.51    4.84 
  -3  -3   5  106.25    4.89 
   3  -3  -5  102.65    5.80 
   3  -3  -5   94.33    6.10 
  -3  -3   5   99.42    4.97 
   3  -3  -5  102.95    5.53 
  -3   3   5   89.91    5.92 
  -3   3   5   86.56    5.50 
   3   3  -5   89.76    5.00 
  -3   3   5   89.22    5.60 
   3   3  -5   92.05    4.98 
   3   3  -5   84.38    4.83 
  -3   3   5   91.81    5.26 
   3   3  -5   87.94    4.78 
  -3   3   5   85.42    5.68 
   2  -3  -5   10.51    1.85 
   2  -3  -5   10.15    1.61 
   2  -3  -5    8.59    1.81 
  -2  -3   5   11.12    1.34 
  -2  -3   5    8.85    1.11 
  -2  -3   5    8.78    1.34 
  -2  -3   5    9.74    1.21 
   2  -3  -5    7.98    1.38 
   2  -3  -5   10.59    1.55 
  -2   3   5   16.55    1.71 
  -2   3   5   16.37    2.18 
   2   3  -5   12.30    1.49 
   2   3  -5   14.04    1.31 
  -2   3   5   15.27    1.90 
   2   3  -5   14.39    1.22 
  -2   3   5   11.46    1.78 
   2   3  -5   14.94    1.43 
  -2   3   5   14.13    1.77 
   1  -3  -5   61.57    4.75 
   1  -3  -5   68.71    4.53 
   1  -3  -5   63.43    4.32 
  -1  -3   5   64.46    4.29 
  -1  -3   5   63.98    3.88 
  -1  -3   5   66.38    4.00 
   1  -3  -5   68.19    4.29 
   1  -3  -5   66.12    4.22 
  -1  -3   5   67.12    4.06 
  -1   3   5   73.08    4.19 
   1   3  -5   77.34    3.84 
  -1   3   5   76.50    4.90 
  -1   3   5   72.19    4.51 
   1   3  -5   73.67    4.00 
   1   3  -5   77.01    4.05 
   1   3  -5   70.85    4.12 
  -1   3   5   77.24    4.51 
   1   3  -5   76.04    4.23 
  -1   3   5   76.18    4.34 
   0  -3   5  159.15    8.39 
   0  -3   5  156.20    8.03 
   0  -3  -5  159.24    8.41 
   0  -3   5  158.64    8.07 
   0  -3  -5  156.65    8.34 
   0  -3  -5  160.51    8.65 
   0  -3  -5  160.64    8.34 
   0  -3   5  159.60    8.20 
   0   3  -5  151.46    8.11 
   0   3  -5  152.51    8.15 
   0   3  -5  155.01    7.67 
   0   3   5  148.54    8.26 
   0   3   5  156.93    8.26 
   0   3   5  162.62    8.76 
   0   3   5  153.91    8.41 
   0   3  -5  153.28    8.11 
   0   3  -5  148.08    8.10 
   0   3   5  149.88    8.08 
   1  -3   5   37.12    2.88 
   1  -3   5   37.19    3.28 
   1  -3   5   39.34    2.85 
  -1  -3  -5   39.51    3.25 
   1  -3   5   37.48    2.67 
  -1  -3  -5   36.80    2.79 
  -1  -3  -5   37.85    2.85 
  -1  -3  -5   36.92    2.95 
   1  -3   5   37.86    2.43 
  -1   3  -5   40.85    3.12 
   1   3   5   44.34    3.59 
   1   3   5   39.55    2.90 
   1   3   5   36.87    2.87 
  -1   3  -5   39.63    2.32 
   1   3   5   39.28    2.76 
  -1   3  -5   41.15    2.73 
  -1   3  -5   38.52    2.99 
  -1   3  -5   37.81    2.77 
  -2  -3  -5  194.40    9.84 
  -2  -3  -5  194.66    9.85 
   2  -3   5  199.36    9.74 
   2  -3   5  193.31    9.68 
   2  -3   5  186.96    9.17 
  -2  -3  -5  186.71    9.72 
   2  -3   5  191.31    9.94 
   2  -3   5  184.49   10.20 
  -2  -3  -5  191.26    9.71 
  -2   3  -5  171.10    9.82 
   2   3   5  179.26    9.57 
   2   3   5  187.12    9.87 
   2   3   5  172.66    9.44 
  -2   3  -5  179.30    9.03 
  -2   3  -5  179.35    9.78 
   2   3   5  172.87    9.54 
   2   3   5  175.42   10.04 
  -2   3  -5  181.48    9.72 
   3  -3   5  197.72   11.39 
  -3  -3  -5  213.23   11.40 
   3  -3   5  204.10   10.96 
  -3  -3  -5  209.32   11.44 
  -3  -3  -5  195.89   11.42 
  -3  -3  -5  200.23   11.46 
   3  -3   5  211.15   12.15 
   3  -3   5  213.45   11.53 
   3  -3   5  201.42   11.75 
  -3   3  -5  236.59   11.97 
  -3   3  -5  245.22   11.86 
  -3   3  -5  239.61   11.67 
   3   3   5  234.62   11.70 
   3   3   5  232.07   11.18 
   3   3   5  243.61   12.05 
   3   3   5  244.26   11.48 
  -3   3  -5  248.81   10.95 
  -4  -3  -5   41.03    3.37 
   4  -3   5   36.76    4.42 
   4  -3   5   37.33    2.90 
   4  -3   5   39.08    3.28 
  -4  -3  -5   41.15    3.27 
  -4  -3  -5   37.24    3.02 
   4  -3   5   36.96    3.24 
  -4  -3  -5   40.47    3.43 
   4  -3   5   40.24    3.73 
   4   3   5   42.18    3.35 
  -4   3  -5   40.64    3.36 
  -4   3  -5   39.40    4.00 
  -4   3  -5   40.30    3.66 
   4   3   5   44.58    3.11 
   4   3   5   40.81    3.92 
  -4   3  -5   45.25    2.83 
   5  -3   5  101.65    7.47 
  -5  -3  -5   96.57    6.01 
  -5  -3  -5  100.63    6.14 
   5  -3   5  101.59    6.20 
  -5  -3  -5  100.36    5.90 
   5  -3   5   99.75    5.85 
  -5  -3  -5   93.82    6.29 
   5  -3   5   96.26    6.72 
   5  -3   5   99.53    6.40 
   5   3   5  105.02    7.06 
  -5   3  -5   94.50    6.86 
  -5   3  -5   98.82    6.53 
   5   3   5  101.67    5.88 
  -5   3  -5  104.88    5.70 
   5   3   5  100.26    6.28 
   6  -3   5   50.47    4.33 
   6  -3   5   53.39    4.27 
   6  -3   5   49.04    4.64 
   6  -3   5   53.84    5.11 
  -6  -3  -5   53.01    3.94 
  -6  -3  -5   48.75    4.23 
  -6  -3  -5   54.94    4.56 
  -6   3  -5   61.51    4.20 
  -6   3  -5   52.21    5.48 
  -6   3  -5   56.66    5.29 
   6   3   5   56.78    4.59 
   6   3   5   55.24    4.00 
   7  -3   5   16.08    2.96 
   7  -3   5   16.52    3.13 
  -7  -3  -5   13.40    3.06 
   7  -3   5   15.37    2.63 
  -7  -3  -5   13.77    2.63 
  -7  -3  -5   12.58    2.65 
   7  -3   5   14.49    4.10 
   7  -3   5   14.35    3.04 
  -7  -3  -5   10.06    1.95 
  -7   3  -5   14.46    2.82 
   7   3   5    8.16    3.19 
  -7   3  -5    8.35    3.35 
   7   3   5   12.90    2.73 
   7   3   5    7.90    1.99 
   8  -3   5   17.80    3.17 
   8  -3   5   17.95    4.63 
   8  -3   5   18.63    3.71 
   8  -3   5   15.52    4.16 
  -8  -3  -5   17.46    2.56 
  -8  -3  -5   20.24    3.46 
   8   3   5   15.81    2.66 
   8   3   5   14.60    4.52 
  -8   3  -5   20.45    3.60 
  -8   3  -5   23.43    4.63 
  -8   3  -5   18.15    2.88 
  -9  -3  -5    7.88    2.34 
  -9  -3  -5   14.64    3.59 
   9  -3   5   10.84    4.27 
   9  -3   5    5.21    3.18 
   9  -3   5    5.94    5.05 
   9   3   5    6.83    2.89 
  -9   3  -5   12.27    4.87 
   9   3   5    8.02    3.18 
  -9   3  -5   11.06    3.49 
  10  -4  -5   45.07    6.61 
  10  -4  -5   47.00    5.83 
  10  -4  -5   39.11    7.57 
 -10   4   5   40.48    6.81 
  10   4  -5   33.40    4.45 
 -10   4   5   33.02    4.99 
   9  -4  -5   20.90    4.61 
   9  -4  -5   18.19    5.42 
   9  -4  -5   16.07    3.95 
   9  -4  -5   13.51    4.46 
  -9  -4   5   15.71    2.79 
   9   4  -5   20.16    2.68 
   9   4  -5   15.50    3.06 
  -9   4   5   20.44    5.03 
  -9   4   5   17.11    3.49 
   9   4  -5   19.65    2.44 
   8  -4  -5   13.51    4.17 
  -8  -4   5   15.12    2.33 
   8  -4  -5   16.10    3.87 
  -8  -4   5   16.84    1.89 
   8  -4  -5   12.47    3.10 
   8   4  -5   11.53    2.65 
  -8   4   5    9.82    3.71 
  -8   4   5   12.05    2.77 
  -8   4   5   16.95    3.34 
   8   4  -5   15.56    2.49 
   8   4  -5   15.60    2.14 
  -7  -4   5   10.06    1.33 
  -7  -4   5   12.22    1.86 
  -7  -4   5    7.51    1.42 
   7  -4  -5   10.18    2.46 
   7  -4  -5   12.94    3.91 
   7  -4  -5    7.37    2.96 
   7  -4  -5   12.53    3.05 
   7  -4  -5   11.13    2.62 
  -7   4   5   11.53    2.40 
  -7   4   5    6.35    2.49 
  -7   4   5    9.05    3.17 
  -7   4   5   -0.01    2.85 
   7   4  -5   10.28    1.62 
  -7   4   5   13.85    2.52 
   7   4  -5   10.03    1.25 
   6  -4  -5    4.59    2.59 
   6  -4  -5    6.47    1.96 
   6  -4  -5    9.47    3.55 
  -6  -4   5    4.97    1.46 
   6  -4  -5    5.86    2.40 
  -6  -4   5    4.36    1.08 
  -6  -4   5    5.45    0.85 
  -6  -4   5    4.42    0.93 
  -6   4   5    4.77    1.94 
   6   4  -5    5.71    1.50 
  -6   4   5    7.97    2.32 
  -6   4   5    5.30    2.39 
   6   4  -5    6.61    0.92 
  -6   4   5   -0.19    2.26 
   6   4  -5    4.92    1.33 
  -6   4   5    4.82    1.56 
   5  -4  -5   84.37    5.90 
   5  -4  -5   77.87    5.29 
  -5  -4   5   82.34    4.17 
   5  -4  -5   71.35    6.21 
   5  -4  -5   73.78    5.81 
  -5  -4   5   82.88    4.66 
   5  -4  -5   72.87    5.24 
   5   4  -5   74.09    4.18 
  -5   4   5   65.14    5.95 
   5   4  -5   79.56    4.57 
   5   4  -5   79.24    4.70 
  -5   4   5   75.59    5.44 
  -5   4   5   77.64    4.98 
  -5   4   5   78.57    5.62 
  -5   4   5   74.81    6.16 
   4  -4  -5   60.64    5.75 
  -4  -4   5   63.65    3.97 
   4  -4  -5   62.86    4.45 
   4  -4  -5   60.79    4.88 
  -4  -4   5   57.53    3.73 
  -4  -4   5   65.95    3.59 
   4  -4  -5   60.88    4.54 
  -4  -4   5   55.66    3.51 
   4  -4  -5   61.02    4.98 
   4   4  -5   64.54    3.57 
   4   4  -5   63.45    3.86 
  -4   4   5   67.33    4.65 
  -4   4   5   62.17    5.23 
   4   4  -5   64.94    4.08 
   4   4  -5   61.87    3.53 
  -4   4   5   65.08    5.38 
  -4   4   5   60.85    4.71 
  -4   4   5   63.87    4.20 
  -3  -4   5   80.70    4.79 
   3  -4  -5   84.87    5.55 
   3  -4  -5   81.99    5.14 
  -3  -4   5   75.77    4.53 
   3  -4  -5   84.41    5.50 
   3  -4  -5   81.35    5.29 
   3  -4  -5   83.68    6.24 
  -3  -4   5   82.15    4.55 
  -3   4   5   76.99    5.21 
  -3   4   5   74.29    5.81 
   3   4  -5   78.14    4.56 
   3   4  -5   85.95    4.95 
  -3   4   5   82.14    5.45 
  -3   4   5   77.66    5.47 
   3   4  -5   76.39    4.45 
   3   4  -5   82.52    4.72 
  -3   4   5   75.08    4.84 
   2  -4  -5   87.32    5.63 
  -2  -4   5   78.91    4.73 
   2  -4  -5   85.77    5.17 
  -2  -4   5   85.66    4.67 
   2  -4  -5   90.16    5.42 
  -2  -4   5   81.64    5.20 
   2  -4  -5   84.16    6.07 
  -2  -4   5   81.01    4.51 
   2  -4  -5   87.14    5.16 
   2   4  -5   78.01    4.58 
   2   4  -5   70.56    4.50 
   2   4  -5   76.32    4.73 
  -2   4   5   75.34    5.23 
  -2   4   5   69.58    5.41 
  -2   4   5   73.24    5.03 
   2   4  -5   78.27    4.94 
  -2   4   5   74.18    5.56 
  -2   4   5   75.89    4.86 
   2   4  -5   77.37    4.64 
  -1  -4   5   33.87    2.92 
   1  -4  -5   31.41    4.05 
  -1  -4   5   29.73    2.61 
   1  -4  -5   33.36    3.13 
   1  -4  -5   27.52    3.15 
  -1  -4   5   34.14    2.84 
   1  -4  -5   30.79    3.15 
   1  -4  -5   35.99    3.55 
  -1  -4   5   31.43    3.53 
   1   4  -5   41.51    3.30 
  -1   4   5   46.45    3.34 
  -1   4   5   43.52    3.10 
  -1   4   5   47.44    3.50 
   1   4  -5   44.93    2.92 
   1   4  -5   43.22    2.93 
  -1   4   5   45.15    4.07 
   1   4  -5   44.03    3.21 
   1   4  -5   45.25    2.72 
  -1   4   5   43.06    3.65 
   0  -4  -5    8.17    1.53 
   0  -4   5   10.35    1.66 
   0  -4  -5    8.01    1.56 
   0  -4  -5    9.83    1.94 
   0  -4   5   13.03    1.75 
   0  -4   5    9.68    1.58 
   0  -4  -5   11.43    2.43 
   0  -4   5   10.99    2.19 
   0   4   5   10.61    1.56 
   0   4  -5   10.12    1.53 
   0   4  -5    9.10    1.40 
   0   4  -5   10.72    1.29 
   0   4   5   11.07    1.70 
   0   4  -5   10.49    1.87 
   0   4   5   11.46    2.01 
   0   4  -5    9.09    1.66 
   0   4   5   11.14    1.78 
   1  -4   5   56.38    4.05 
   1  -4   5   59.42    4.71 
   1  -4   5   58.07    3.78 
  -1  -4  -5   63.72    4.77 
   1  -4   5   53.12    3.98 
   1  -4   5   59.50    3.59 
  -1  -4  -5   55.65    4.42 
  -1  -4  -5   58.55    4.06 
  -1  -4  -5   59.49    4.07 
   1   4   5   53.84    4.05 
   1   4   5   56.87    4.87 
  -1   4  -5   55.80    3.81 
   1   4   5   54.38    4.06 
  -1   4  -5   49.60    4.04 
  -1   4  -5   56.51    4.39 
   1   4   5   55.14    3.83 
   1   4   5   58.82    3.96 
  -1   4  -5   57.11    3.39 
  -1   4  -5   53.94    3.91 
   2  -4   5    8.58    1.81 
  -2  -4  -5    8.44    2.02 
  -2  -4  -5    6.53    1.40 
   2  -4   5    8.61    1.61 
   2  -4   5    8.38    1.71 
  -2  -4  -5    7.59    1.53 
  -2  -4  -5    8.74    2.07 
   2  -4   5    8.04    2.16 
   2  -4   5    7.73    1.35 
  -2   4  -5   10.71    1.59 
  -2   4  -5   12.72    2.31 
   2   4   5   14.88    1.90 
   2   4   5   11.71    1.86 
  -2   4  -5   13.49    1.53 
   2   4   5   12.62    1.97 
   2   4   5    8.99    1.60 
  -2   4  -5   12.71    2.07 
   2   4   5   15.49    2.73 
  -2   4  -5   12.25    2.01 
   3  -4   5    3.47    1.39 
  -3  -4  -5    3.55    1.29 
   3  -4   5    4.91    2.42 
   3  -4   5    5.15    1.80 
  -3  -4  -5    3.46    1.35 
   3  -4   5    3.98    1.62 
  -3  -4  -5    7.37    1.82 
   3  -4   5    4.72    1.22 
  -3  -4  -5    6.78    1.85 
   3   4   5    0.37    2.10 
  -3   4  -5    1.73    1.68 
  -3   4  -5    2.59    1.23 
  -3   4  -5    1.12    0.79 
  -3   4  -5    1.90    1.52 
   3   4   5    1.18    1.15 
   3   4   5    0.57    1.29 
   3   4   5    1.89    1.01 
   3   4   5   -0.43    1.41 
   4  -4   5  103.35    7.21 
   4  -4   5  104.56    7.85 
   4  -4   5  110.11    6.76 
  -4  -4  -5  108.14    6.73 
  -4  -4  -5  110.89    6.72 
  -4  -4  -5  116.57    7.28 
   4  -4   5  104.42    6.78 
  -4  -4  -5  106.27    6.49 
   4  -4   5  106.45    6.31 
  -4   4  -5  113.47    7.12 
  -4   4  -5  108.07    6.72 
  -4   4  -5  105.83    7.27 
  -4   4  -5  118.83    6.12 
   4   4   5  119.72    7.97 
   4   4   5  109.65    6.21 
   4   4   5  114.50    6.45 
   5  -4   5   20.66    2.53 
   5  -4   5   19.84    2.95 
   5  -4   5   15.61    2.88 
  -5  -4  -5   20.55    2.84 
   5  -4   5   25.62    4.60 
   5  -4   5   16.07    2.45 
  -5  -4  -5   18.87    2.76 
  -5  -4  -5   21.46    2.67 
  -5   4  -5   21.48    2.95 
   5   4   5   23.48    4.01 
   5   4   5   20.23    2.50 
  -5   4  -5   19.66    3.50 
  -5   4  -5   23.23    2.63 
   5   4   5   22.76    2.87 
  -6  -4  -5   31.26    4.14 
   6  -4   5   27.89    3.30 
  -6  -4  -5   31.46    3.98 
   6  -4   5   31.02    5.39 
   6  -4   5   19.94    3.78 
   6  -4   5   26.56    3.91 
  -6  -4  -5   29.28    3.55 
  -6  -4  -5   25.67    3.22 
  -6   4  -5   38.32    4.66 
   6   4   5   36.57    4.25 
   6   4   5   35.83    4.96 
   6   4   5   35.70    3.47 
  -6   4  -5   29.62    4.24 
  -6   4  -5   34.42    3.51 
   7  -4   5   36.77    4.72 
   7  -4   5   29.46    4.35 
  -7  -4  -5   36.93    4.07 
  -7  -4  -5   31.73    3.68 
  -7  -4  -5   32.23    3.90 
   7  -4   5   39.27    6.05 
   7   4   5   30.60    3.91 
  -7   4  -5   34.44    4.33 
  -7   4  -5   41.26    4.54 
   7   4   5   35.93    5.91 
  -7   4  -5   29.05    4.69 
  -8  -4  -5    1.68    3.02 
  -8  -4  -5    4.98    2.10 
   8  -4   5    7.90    4.22 
   8  -4   5    5.96    3.01 
   8  -4   5    6.30    4.92 
   8   4   5    0.06    2.23 
  -8   4  -5   -0.31    4.13 
  -8   4  -5    6.97    3.35 
   9  -4   5   11.08    6.60 
   9  -4   5    8.64    4.71 
   9  -4   5    7.44    4.06 
  -9  -4  -5   10.57    2.83 
  -9   4  -5   13.59    5.70 
  -9   4  -5   11.92    4.15 
   9  -5  -5   16.74    4.67 
   9  -5  -5   26.75    5.87 
   9  -5  -5   21.25    7.12 
   9   5  -5   12.83    3.84 
  -9   5   5   16.84    5.90 
  -9   5   5   14.11    3.77 
   8  -5  -5   15.83    4.45 
   8  -5  -5   14.78    5.41 
  -8  -5   5   18.69    3.04 
   8  -5  -5   16.16    3.90 
   8   5  -5   24.27    2.95 
  -8   5   5   22.93    5.68 
  -8   5   5   16.70    3.43 
  -7  -5   5   35.84    2.55 
   7  -5  -5   32.27    6.23 
  -7  -5   5   33.33    2.61 
  -7  -5   5   36.09    4.25 
   7  -5  -5   32.04    4.70 
   7  -5  -5   30.91    4.12 
   7  -5  -5   39.75    5.77 
  -7  -5   5   36.90    3.24 
  -7   5   5   30.09    5.04 
   7   5  -5   42.21    3.88 
  -7   5   5   32.89    4.57 
  -7   5   5   31.52    4.00 
   7   5  -5   37.77    2.80 
   6  -5  -5   59.86    6.33 
   6  -5  -5   58.78    5.53 
  -6  -5   5   56.58    4.77 
   6  -5  -5   60.30    7.41 
  -6  -5   5   60.80    3.90 
   6  -5  -5   68.49    6.80 
  -6  -5   5   63.90    3.74 
   6   5  -5   62.37    4.79 
   6   5  -5   64.75    3.92 
  -6   5   5   64.55    6.80 
  -6   5   5   63.04    5.73 
   6   5  -5   67.72    4.59 
   5  -5  -5   31.11    3.85 
  -5  -5   5   28.31    3.43 
   5  -5  -5   34.50    4.62 
   5  -5  -5   23.42    3.10 
   5  -5  -5   24.10    4.27 
   5  -5  -5   29.19    3.91 
  -5   5   5   14.17    3.84 
   5   5  -5   20.04    2.08 
  -5   5   5   15.39    2.79 
  -5   5   5   18.35    3.70 
   5   5  -5   17.06    2.44 
  -5   5   5   19.85    2.69 
   5   5  -5   19.44    2.28 
   5   5  -5   17.60    2.00 
   4  -5  -5    2.95    1.80 
   4  -5  -5    2.51    3.19 
  -4  -5   5    4.00    1.76 
   4  -5  -5    2.09    2.29 
  -4  -5   5    3.05    1.14 
  -4  -5   5    3.32    1.75 
   4  -5  -5    1.95    2.08 
  -4   5   5    1.55    1.77 
   4   5  -5    1.77    1.66 
  -4   5   5    3.52    1.73 
   4   5  -5    2.62    1.51 
  -4   5   5    2.85    2.89 
   4   5  -5    1.54    1.82 
  -4   5   5    0.95    2.06 
   4   5  -5    1.73    1.14 
  -4   5   5    4.42    2.23 
  -3  -5   5   73.46    4.75 
  -3  -5   5   76.44    4.89 
   3  -5  -5   77.83    5.78 
   3  -5  -5   74.31    5.84 
   3  -5  -5   75.96    5.79 
   3  -5  -5   80.47    6.99 
  -3  -5   5   85.91    5.66 
   3  -5  -5   75.56    6.29 
  -3  -5   5   77.49    5.32 
  -3   5   5   83.71    6.11 
  -3   5   5   81.21    5.81 
   3   5  -5   84.31    4.84 
   3   5  -5   83.17    5.57 
  -3   5   5   80.21    5.27 
   3   5  -5   80.44    5.05 
  -3   5   5   84.36    6.72 
   3   5  -5   81.81    5.15 
   3   5  -5   79.67    5.18 
  -2  -5   5   26.58    3.02 
   2  -5  -5   19.47    3.91 
  -2  -5   5   19.78    2.54 
   2  -5  -5   26.31    3.33 
   2  -5  -5   16.09    2.44 
  -2  -5   5   22.15    2.34 
   2  -5  -5   22.31    2.89 
  -2  -5   5   19.71    3.11 
   2  -5  -5   29.42    3.57 
   2   5  -5   18.29    2.16 
  -2   5   5   16.46    2.32 
   2   5  -5   17.01    2.62 
  -2   5   5   13.34    2.38 
  -2   5   5   16.63    2.95 
  -2   5   5   24.74    3.67 
   2   5  -5   19.83    2.44 
   2   5  -5   19.32    2.54 
  -2   5   5   16.21    2.52 
   2   5  -5   17.14    2.46 
  -1  -5   5   14.19    2.17 
  -1  -5   5   13.89    1.93 
   1  -5  -5   13.57    2.23 
   1  -5  -5   17.50    3.46 
  -1  -5   5   15.69    3.11 
   1  -5  -5   18.11    2.78 
  -1  -5   5   15.81    2.16 
   1  -5  -5   16.97    2.89 
  -1   5   5   17.59    2.65 
   1   5  -5   20.86    2.35 
  -1   5   5   21.34    2.59 
   1   5  -5   23.31    2.93 
   1   5  -5   16.34    2.14 
   1   5  -5   19.88    2.75 
   1   5  -5   18.78    2.48 
  -1   5   5   20.02    2.50 
  -1   5   5   17.07    3.36 
  -1   5   5   20.95    2.80 
   0  -5   5   93.50    5.91 
   0  -5   5   90.48    6.81 
   0  -5  -5   89.89    5.79 
   0  -5  -5   90.44    5.97 
   0  -5   5   90.15    5.45 
   0  -5  -5   95.78    6.95 
   0  -5   5   90.49    5.70 
   0   5   5   80.46    6.72 
   0   5   5   81.56    5.98 
   0   5   5   86.03    5.64 
   0   5  -5   84.35    5.08 
   0   5   5   84.45    6.03 
   0   5   5   79.00    5.58 
   0   5  -5   86.92    5.51 
   0   5  -5   81.65    6.03 
   0   5  -5   82.13    5.47 
   0   5  -5   76.75    5.76 
   1  -5   5   33.51    3.81 
   1  -5   5   29.96    3.84 
   1  -5   5   38.89    4.88 
  -1  -5  -5   37.22    3.72 
   1  -5   5   31.73    3.34 
  -1  -5  -5   31.55    4.45 
  -1   5  -5   37.96    3.99 
  -1   5  -5   37.49    2.89 
  -1   5  -5   37.68    3.53 
  -1   5  -5   41.65    4.32 
   1   5   5   28.09    3.99 
  -1   5  -5   35.59    3.47 
   1   5   5   42.60    3.66 
   1   5   5   40.69    3.44 
   2  -5   5   57.34    4.44 
  -2  -5  -5   60.28    5.04 
   2  -5   5   61.12    6.02 
   2  -5   5   60.71    4.70 
   2  -5   5   61.09    4.03 
  -2  -5  -5   65.68    4.47 
  -2  -5  -5   60.59    4.56 
   2   5   5   49.87    4.32 
  -2   5  -5   46.04    3.54 
  -2   5  -5   47.83    4.81 
   2   5   5   45.46    5.71 
   2   5   5   46.49    4.11 
  -2   5  -5   48.33    4.42 
  -2   5  -5   49.29    5.06 
   2   5   5   46.22    4.15 
  -3  -5  -5  130.51    8.03 
   3  -5   5  116.66    9.08 
   3  -5   5  122.13    7.24 
   3  -5   5  119.83    7.67 
  -3  -5  -5  126.36    8.03 
   3  -5   5  117.16    8.08 
  -3  -5  -5  121.22    7.54 
  -3   5  -5  129.63    8.43 
   3   5   5  132.43    9.15 
  -3   5  -5  126.76    8.11 
  -3   5  -5  132.13    8.50 
   3   5   5  131.01    7.47 
   3   5   5  129.84    7.77 
   3   5   5  130.17    7.45 
  -3   5  -5  132.76    6.95 
  -4  -5  -5    9.50    1.92 
   4  -5   5   15.18    4.29 
   4  -5   5   12.09    2.20 
  -4  -5  -5   11.51    2.52 
   4  -5   5    6.20    2.37 
  -4  -5  -5   10.04    2.98 
   4  -5   5   11.04    2.41 
   4  -5   5   11.98    3.08 
   4   5   5   13.76    2.67 
   4   5   5    7.93    3.38 
   4   5   5   11.35    1.92 
  -4   5  -5    6.63    2.74 
  -4   5  -5    9.89    2.27 
  -4   5  -5    7.77    2.74 
   4   5   5    8.91    2.47 
   4   5   5   10.79    2.16 
  -4   5  -5    8.91    1.81 
  -5  -5  -5    7.41    2.82 
   5  -5   5   12.72    4.64 
   5  -5   5    9.19    3.12 
   5  -5   5   10.23    2.30 
  -5  -5  -5    8.87    2.07 
  -5   5  -5   10.35    3.14 
   5   5   5   11.01    2.22 
  -5   5  -5   12.12    2.16 
   5   5   5   11.43    3.94 
  -5   5  -5    8.73    3.26 
  -6  -5  -5   16.79    3.39 
   6  -5   5   18.14    3.10 
   6  -5   5   15.37    3.86 
  -6  -5  -5   13.39    2.50 
  -6  -5  -5   20.38    3.52 
   6  -5   5   17.62    5.53 
   6   5   5   19.04    2.82 
  -6   5  -5   21.13    4.43 
   6   5   5   21.22    5.74 
  -6   5  -5   18.96    3.89 
  -6   5  -5   16.02    2.72 
  -7  -5  -5    1.92    2.20 
   7  -5   5    6.51    3.15 
   7  -5   5    4.53    4.00 
   7  -5   5    0.98    5.56 
  -7  -5  -5    9.19    3.35 
  -7   5  -5    2.35    4.36 
   7   5   5    3.99    2.39 
  -7   5  -5    7.71    3.69 
   8  -5   5   13.15    6.68 
   8  -5   5   22.95    4.61 
  -8  -5  -5   17.50    3.26 
   8  -5   5   17.16    5.47 
  -8   5  -5   21.09    6.08 
  -8   5  -5   22.90    5.27 
   7  -6  -5    4.98    4.10 
  -7  -6   5    5.47    1.55 
   7  -6  -5    4.31    3.78 
   7  -6  -5    8.81    5.96 
  -7   6   5    6.22    3.46 
  -7   6   5    3.63    4.78 
   6  -6  -5    1.46    5.26 
   6  -6  -5    7.64    3.18 
  -6  -6   5    0.79    2.93 
  -6  -6   5    4.77    1.58 
   6  -6  -5    2.52    3.32 
  -6   6   5    5.65    3.22 
  -6   6   5    7.19    4.54 
  -5  -6   5   30.40    3.31 
  -5  -6   5   25.64    3.04 
   5  -6  -5   23.61    4.01 
  -5  -6   5   25.04    3.61 
   5  -6  -5   29.54    4.64 
   5  -6  -5   20.52    5.38 
  -5   6   5   32.55    4.24 
   5   6  -5   26.12    3.57 
  -5   6   5   28.83    4.78 
   5   6  -5   28.30    2.97 
   5   6  -5   24.22    3.21 
   5   6  -5   28.58    3.70 
   5   6  -5   26.87    3.63 
   4  -6  -5   18.30    3.27 
   4  -6  -5   18.89    3.36 
   4  -6  -5   25.53    4.12 
  -4  -6   5   18.11    2.30 
  -4  -6   5   18.09    3.39 
   4  -6  -5   13.75    4.15 
  -4  -6   5   19.35    2.30 
  -4  -6   5   16.45    3.12 
   4   6  -5   17.12    3.24 
   4   6  -5   17.17    2.90 
   4   6  -5   19.01    2.41 
   4   6  -5   17.07    2.35 
  -4   6   5   18.69    3.31 
   4   6  -5   20.52    3.05 
  -4   6   5   18.58    4.10 
  -3  -6   5   37.84    4.33 
  -3  -6   5   36.65    3.59 
  -3  -6   5   34.81    3.55 
   3  -6  -5   34.37    4.48 
   3  -6  -5   37.79    4.92 
   3  -6  -5   33.18    4.61 
   3  -6  -5   33.85    5.40 
   3   6  -5   32.92    3.52 
   3   6  -5   28.23    3.36 
  -3   6   5   32.67    5.49 
   3   6  -5   34.70    4.08 
   3   6  -5   30.28    3.97 
   3   6  -5   32.28    3.95 
  -3   6   5   32.00    4.49 
  -3   6   5   32.19    4.56 
   2  -6  -5   48.51    6.09 
  -2  -6   5   36.76    4.32 
  -2  -6   5   43.40    4.03 
  -2  -6   5   50.33    5.94 
   2  -6  -5   50.53    5.22 
   2  -6  -5   42.55    5.51 
  -2  -6   5   50.45    4.33 
   2   6  -5   43.73    4.21 
  -2   6   5   58.14    7.11 
   2   6  -5   47.23    4.42 
  -2   6   5   54.16    5.21 
   2   6  -5   51.65    4.71 
  -2   6   5   53.93    5.15 
   2   6  -5   51.92    5.35 
   2   6  -5   50.18    4.68 
  -2   6   5   48.29    5.13 
  -2   6   5   44.86    5.74 
   1  -6  -5   25.50    3.66 
   1  -6  -5   28.32    3.72 
  -1  -6   5   23.48    4.28 
  -1  -6   5   24.77    3.40 
   1  -6  -5   22.67    4.84 
  -1  -6   5   28.45    3.52 
  -1  -6   5   23.78    3.36 
  -1   6   5   27.88    4.72 
  -1   6   5   22.41    3.58 
  -1   6   5   27.54    3.44 
  -1   6   5   18.37    3.48 
   1   6  -5   24.51    3.12 
   1   6  -5   21.82    3.23 
   1   6  -5   24.99    3.75 
   1   6  -5   19.69    2.71 
   1   6  -5   26.39    3.19 
   0  -6   5   26.28    3.64 
   0  -6   5   26.16    4.64 
   0  -6   5   28.34    3.72 
   0  -6  -5   19.97    3.05 
   0  -6  -5   32.07    4.85 
   0  -6   5   29.23    3.64 
   0  -6  -5   32.66    3.84 
   0   6  -5   26.56    3.31 
   0   6   5   20.94    4.13 
   0   6  -5   21.63    3.39 
   0   6   5   16.85    2.79 
   0   6   5   23.65    3.38 
   0   6   5   24.36    3.54 
   0   6  -5   25.74    3.12 
   0   6  -5   21.19    2.92 
   1  -6   5   27.10    5.00 
  -1  -6  -5   32.25    4.10 
   1  -6   5   34.29    4.23 
  -1  -6  -5   32.55    4.70 
   1  -6   5   33.82    4.26 
  -1  -6  -5   34.66    4.20 
  -1   6  -5   34.10    4.19 
   1   6   5   41.30    5.42 
  -1   6  -5   33.97    4.25 
   1   6   5   34.66    4.13 
  -1   6  -5   37.74    4.75 
   1   6   5   33.84    4.27 
  -1   6  -5   33.72    3.50 
   2  -6   5   30.25    5.03 
  -2  -6  -5   23.33    3.42 
  -2  -6  -5   19.80    3.91 
  -2  -6  -5   21.56    2.91 
   2  -6   5   27.88    3.60 
   2  -6   5   24.74    3.26 
  -2   6  -5   15.88    3.01 
  -2   6  -5   21.81    2.57 
  -2   6  -5   18.64    3.60 
   2   6   5   20.67    3.03 
   2   6   5   12.90    4.41 
   2   6   5   18.33    2.93 
  -2   6  -5   22.86    4.28 
   3  -6   5   18.45    2.87 
  -3  -6  -5   18.38    2.96 
   3  -6   5   20.29    3.30 
  -3  -6  -5   23.53    4.04 
   3  -6   5   19.48    3.32 
  -3  -6  -5   17.03    3.18 
   3   6   5   16.37    2.85 
  -3   6  -5   17.87    3.93 
  -3   6  -5   13.51    2.36 
   3   6   5   15.51    2.73 
  -3   6  -5   13.60    4.17 
   3   6   5   12.85    4.73 
  -3   6  -5   15.54    3.24 
   4  -6   5   18.20    5.71 
   4  -6   5   13.86    3.65 
  -4  -6  -5   16.26    3.66 
  -4  -6  -5   15.64    2.92 
  -4  -6  -5   18.33    3.73 
   4  -6   5   15.61    2.95 
   4   6   5   23.16    3.20 
  -4   6  -5   20.73    4.10 
   4   6   5   20.94    2.92 
  -4   6  -5   18.60    3.72 
  -4   6  -5   21.04    2.77 
   4   6   5   25.41    5.95 
  -5  -6  -5   28.64    3.58 
   5  -6   5   27.74    5.01 
   5  -6   5   29.20    3.82 
   5  -6   5   27.30    6.88 
  -5  -6  -5   27.29    4.24 
  -5   6  -5   22.19    5.20 
   5   6   5   37.43    6.92 
  -5   6  -5   25.27    4.51 
   5   6   5   27.72    3.65 
  -5   6  -5   37.67    4.93 
   6  -6   5   17.28    7.16 
   6  -6   5   15.67    4.86 
  -6  -6  -5   16.85    3.11 
   6  -6   5   18.75    3.58 
  -6  -6  -5   13.67    4.28 
  -6   6  -5   14.29    4.63 
  -6   6  -5   26.47    5.95 
   6   6   5   14.79    3.39 
  -5  -7   5   11.06    2.52 
   5  -7  -5    6.30    3.92 
   5  -7  -5   10.55    4.35 
   5  -7  -5    9.11    7.23 
  -5   7   5   16.53    4.63 
  -5   7   5    6.60    5.02 
   5   7  -5   10.03    2.48 
  -4  -7   5   18.26    2.92 
   4  -7  -5   16.31    6.65 
   4  -7  -5   17.30    3.99 
   4  -7  -5   15.03    4.10 
   4   7  -5   17.61    2.96 
  -4   7   5   16.69    5.32 
  -4   7   5   16.07    4.44 
  -3  -7   5   11.92    2.60 
   3  -7  -5    4.96    3.32 
   3  -7  -5    9.63    5.59 
  -3   7   5   11.01    3.89 
   3   7  -5    6.64    2.74 
  -3   7   5    8.93    4.45 
   2  -7  -5    2.44    4.99 
  -2  -7   5    3.37    2.39 
   2  -7  -5    4.46    3.12 
  -2  -7   5    1.29    4.35 
  -2   7   5    3.76    3.17 
   2   7  -5   -0.98    2.78 
   2   7  -5    3.95    2.64 
   2   7  -5    4.00    3.03 
  -2   7   5    5.07    3.71 
   1  -7  -5    6.19    2.78 
   1  -7  -5   14.75    5.45 
  -1  -7   5    9.45    2.93 
   1  -7  -5    8.34    4.10 
  -1  -7   5   13.30    4.86 
  -1   7   5   12.11    3.36 
   1   7  -5   11.95    3.04 
  -1   7   5   13.85    3.79 
   1   7  -5    8.44    3.32 
   1   7  -5    8.60    3.08 
   0  -7  -5   44.46    6.86 
   0  -7   5   43.10    5.40 
   0  -7   5   35.74    6.47 
   0  -7  -5   45.68    5.63 
   0   7  -5   47.97    6.46 
   0   7  -5   45.49    5.32 
   0   7  -5   43.98    6.03 
   0   7   5   42.49    4.86 
   0   7   5   37.08    5.19 
   0   7  -5   45.45    5.79 
   0   7   5   48.43    7.31 
  -1  -7  -5   34.43    5.81 
   1  -7   5   26.82    3.97 
   1  -7   5   25.36    6.07 
  -1  -7  -5   26.42    3.69 
  -1   7  -5   35.70    4.50 
   1   7   5   26.39    3.92 
  -1   7  -5   27.50    5.77 
  -1   7  -5   35.93    4.90 
  -1   7  -5   30.42    3.76 
   1   7   5   37.39    7.17 
  -2  -7  -5   25.65    5.14 
   2  -7   5   29.63    6.91 
   2  -7   5   27.84    4.22 
  -2  -7  -5   27.31    4.07 
  -2   7  -5   18.64    4.52 
   2   7   5   22.56    3.85 
  -2   7  -5   27.85    6.06 
   2   7   5   18.30    6.19 
  -2   7  -5   30.45    3.55 
  -2   7  -5   27.81    4.54 
   2   7   5   21.80    3.84 
  -3  -7  -5    2.70    4.36 
  -3  -7  -5    7.76    3.02 
   3  -7   5   -0.49    6.02 
   3  -7   5    1.24    3.37 
  -3   7  -5   -1.26    3.93 
  -3   7  -5    3.44    2.87 
   3   7   5    2.15    2.80 
   3   7   5    3.53    2.86 
  -3   7  -5    0.37    3.61 
   4  -7   5   25.72    7.92 
  -4  -7  -5   26.74    5.07 
  -4  -7  -5   25.89    4.06 
   4  -7   5   25.59    5.10 
   4  -7   5   31.14    4.35 
  -4   7  -5   28.84    5.70 
  -4   7  -5   22.47    5.40 
   4   7   5   27.07    3.84 
   4   7   5   24.57    4.07 
  11   0  -6    3.84    3.51 
  11   0  -6    7.60    2.83 
 -11   0   6    8.75    2.30 
 -10   0   6   23.26    3.21 
  10   0  -6   21.00    2.60 
  10   0  -6   16.43    2.87 
  10   0  -6   16.94    2.97 
 -10   0   6   21.48    2.68 
 -10   0   6   22.10    3.44 
  10   0  -6   18.87    3.46 
  10   0  -6   20.64    2.72 
   9   0  -6  166.57    9.10 
   9   0  -6  171.87    9.12 
  -9   0   6  167.21    9.20 
   9   0  -6  172.00    9.56 
   9   0  -6  165.46    9.53 
  -9   0   6  171.95    9.70 
   9   0  -6  168.91    9.80 
  -9   0   6  171.59    8.96 
   8   0  -6  159.91    8.82 
  -8   0   6  161.71    8.93 
   8   0  -6  159.38    9.01 
   8   0  -6  164.25    8.55 
   8   0  -6  166.08    8.52 
  -8   0   6  165.10    8.63 
  -8   0   6  159.90    8.40 
   8   0  -6  151.04    8.78 
  -7   0   6  148.10    7.79 
   7   0  -6  149.44    7.69 
   7   0  -6  145.15    8.08 
   7   0  -6  136.32    7.99 
  -7   0   6  147.43    7.96 
  -7   0   6  150.64    7.64 
   7   0  -6  145.39    7.98 
   7   0  -6  152.23    7.69 
   6   0  -6   76.18    4.07 
  -6   0   6   72.09    4.11 
   6   0  -6   72.82    4.07 
   6   0  -6   73.56    4.19 
  -6   0   6   71.84    3.98 
  -6   0   6   69.49    4.47 
   6   0  -6   71.14    4.37 
   6   0  -6   71.21    4.47 
   5   0  -6   18.87    1.81 
  -5   0   6   19.30    1.87 
  -5   0   6   19.97    1.53 
   5   0  -6   19.72    1.57 
   5   0  -6   19.05    1.56 
   5   0  -6   19.51    1.93 
  -5   0   6   19.54    1.78 
   5   0  -6   19.32    1.48 
   4   0  -6   39.08    2.22 
   4   0  -6   38.98    2.53 
   4   0  -6   37.22    2.44 
  -4   0   6   38.98    2.35 
  -4   0   6   37.39    2.40 
   4   0  -6   37.25    2.26 
   4   0  -6   37.09    2.27 
  -4   0   6   39.26    2.22 
   3   0  -6  117.98    5.93 
   3   0  -6  119.93    6.03 
   3   0  -6  121.24    6.02 
  -3   0   6  126.57    5.98 
   3   0  -6  122.16    6.01 
  -3   0   6  116.68    5.99 
   3   0  -6  114.97    6.01 
  -3   0   6  117.55    5.98 
   2   0  -6   47.03    2.51 
   2   0  -6   44.26    2.45 
   2   0  -6   47.24    2.45 
  -2   0   6   38.76    2.40 
   2   0  -6   45.83    2.52 
  -2   0   6   47.43    2.61 
  -2   0   6   44.72    2.42 
   2   0  -6   46.66    2.47 
  -2   0   6   47.70    2.42 
   1   0  -6  453.68   21.23 
   1   0  -6  449.66   21.28 
  -1   0   6  471.15   21.88 
  -1   0   6  464.85   21.81 
  -1   0   6  450.70   21.20 
   1   0  -6  452.87   21.83 
   1   0  -6  440.00   21.27 
  -1   0   6  458.01   21.36 
  -1   0   6  441.29   21.20 
   1   0  -6  445.08   21.81 
   0   0  -6  858.38   41.07 
   0   0   6  863.22   41.08 
   0   0   6  842.83   40.02 
   0   0  -6  879.21   39.95 
   0   0  -6  848.90   41.09 
   0   0   6  846.34   39.92 
   0   0  -6  866.17   40.02 
   0   0   6  846.11   41.11 
   1   0   6  169.20    8.83 
  -1   0  -6  182.21    8.73 
  -1   0  -6  175.84    8.81 
  -1   0  -6  172.08    8.83 
   1   0   6  174.66    8.72 
   1   0   6  181.76    8.85 
  -2   0  -6   89.89    4.97 
  -2   0  -6   95.17    5.08 
  -2   0  -6   88.31    4.99 
   2   0   6   94.91    5.07 
   2   0   6   94.01    5.02 
   2   0   6   94.37    5.03 
   3   0   6    1.42    0.75 
  -3   0  -6    1.12    0.60 
   3   0   6    0.96    0.63 
   3   0   6    0.94    0.67 
  -3   0  -6    1.12    0.64 
  -3   0  -6    0.29    0.76 
   4   0   6   13.46    1.81 
   4   0   6   13.46    1.65 
   4   0   6   13.41    1.81 
  -4   0  -6   12.32    1.60 
  -4   0  -6   13.18    1.78 
  -4   0  -6   12.63    1.54 
   5   0   6   21.57    2.16 
  -5   0  -6   24.52    2.28 
  -5   0  -6   19.52    2.20 
  -5   0  -6   22.35    2.64 
   5   0   6   23.02    2.30 
  -6   0  -6    0.71    1.32 
   6   0   6    1.96    1.20 
   6   0   6    1.88    1.49 
  -6   0  -6    1.68    1.09 
  -6   0  -6    2.32    1.12 
   6   0   6    1.19    1.31 
   6   0   6    2.29    1.16 
  -7   0  -6    2.89    1.52 
   7   0   6    2.66    1.58 
  -7   0  -6    2.01    1.41 
   7   0   6    3.04    1.53 
  -7   0  -6    2.79    1.70 
   7   0   6    3.64    1.92 
  -8   0  -6   65.56    5.68 
  -8   0  -6   62.62    4.96 
   8   0   6   69.85    5.98 
   8   0   6   65.53    4.90 
   8   0   6   63.19    5.33 
  -8   0  -6   62.31    4.90 
   9   0   6   53.51    5.12 
   9   0   6   59.57    6.46 
  -9   0  -6   60.56    6.32 
  -9   0  -6   48.46    5.02 
  -9   0  -6   59.51    5.29 
   9   0   6   50.73    6.27 
 -10   0  -6   69.10    6.45 
 -10   0  -6   69.22    8.19 
  10   0   6   69.44    7.52 
  10   0   6   70.14    6.28 
  10   0   6   66.50    8.62 
  10   0   6   80.27    7.82 
 -11  -1   6   34.09    3.82 
  11  -1  -6   32.54    4.47 
  11  -1  -6   31.46    5.13 
  11  -1  -6   26.86    4.06 
 -11   1   6   24.09    4.87 
  11   1  -6   24.75    4.04 
  11   1  -6   32.29    3.96 
 -11   1   6   27.86    3.60 
 -10  -1   6   33.65    4.35 
  10  -1  -6   29.73    3.91 
 -10  -1   6   28.66    3.19 
  10  -1  -6   28.85    3.39 
  10  -1  -6   25.89    3.47 
  10  -1  -6   24.98    4.35 
 -10   1   6   33.57    4.28 
  10   1  -6   33.99    3.71 
 -10   1   6   36.27    3.92 
  10   1  -6   36.72    4.50 
  10   1  -6   35.31    4.10 
  10   1  -6   34.71    3.82 
 -10   1   6   35.24    3.43 
   9  -1  -6   47.05    5.23 
   9  -1  -6   44.87    4.64 
   9  -1  -6   47.07    4.25 
   9  -1  -6   48.34    4.55 
   9  -1  -6   41.45    3.89 
  -9  -1   6   47.46    3.53 
  -9   1   6   51.58    3.88 
  -9   1   6   52.91    5.03 
   9   1  -6   52.62    4.37 
  -9   1   6   57.17    4.24 
   9   1  -6   56.46    4.50 
   9   1  -6   55.15    3.86 
   9   1  -6   53.52    3.90 
   9   1  -6   59.84    3.88 
   8  -1  -6   18.41    3.01 
  -8  -1   6   19.62    1.97 
   8  -1  -6   16.35    2.07 
  -8  -1   6   15.24    2.00 
   8  -1  -6   14.68    2.19 
   8  -1  -6   17.90    2.54 
   8  -1  -6   18.31    2.76 
  -8  -1   6   18.30    1.71 
   8   1  -6   21.18    2.66 
   8   1  -6   19.77    2.25 
   8   1  -6   20.87    2.11 
  -8   1   6   21.88    2.56 
   8   1  -6   20.52    2.16 
  -8   1   6   19.11    2.79 
   8   1  -6   19.61    2.32 
   7  -1  -6   71.63    5.13 
  -7  -1   6   73.33    3.80 
   7  -1  -6   70.73    4.56 
  -7  -1   6   67.11    3.66 
   7  -1  -6   72.02    4.19 
   7  -1  -6   76.05    4.49 
   7  -1  -6   71.85    4.59 
   7   1  -6   60.83    3.86 
   7   1  -6   66.32    3.88 
  -7   1   6   64.72    4.34 
   7   1  -6   64.15    3.90 
  -7   1   6   63.89    4.14 
   7   1  -6   67.68    4.21 
  -7   1   6   66.73    4.74 
  -7   1   6   57.71    4.31 
   7   1  -6   63.91    4.32 
  -6  -1   6  222.55   10.39 
   6  -1  -6  207.64   10.99 
   6  -1  -6  213.62   10.80 
   6  -1  -6  207.05   10.83 
   6  -1  -6  202.14   11.12 
   6  -1  -6  209.75   10.72 
  -6   1   6  217.08   10.90 
  -6   1   6  212.64   10.80 
   6   1  -6  215.24   10.46 
   6   1  -6  214.43   10.38 
   6   1  -6  179.70   10.16 
  -6   1   6  211.36   10.88 
  -6   1   6  216.05   10.73 
  -6   1   6  218.59   11.04 
   6   1  -6  208.63   10.48 
   6   1  -6  216.96   10.71 
   5  -1  -6    6.09    1.08 
  -5  -1   6    6.45    0.75 
   5  -1  -6    7.58    1.21 
   5  -1  -6    6.47    1.55 
   5  -1  -6    6.39    1.08 
  -5   1   6    4.19    1.17 
   5   1  -6    4.44    0.80 
  -5   1   6    3.76    1.13 
   5   1  -6    4.63    0.87 
  -5   1   6    5.41    1.00 
  -5   1   6    4.10    0.93 
  -5   1   6    3.67    0.94 
   5   1  -6    4.29    0.60 
   5   1  -6    4.29    0.58 
   5   1  -6    4.54    0.65 
   4  -1  -6   21.97    1.88 
   4  -1  -6   21.00    1.65 
   4  -1  -6   20.08    2.22 
   4  -1  -6   20.69    1.78 
   4  -1  -6   19.86    1.82 
  -4   1   6   19.99    1.71 
  -4   1   6   19.54    1.62 
  -4   1   6   22.95    2.04 
   4   1  -6   21.01    1.16 
  -4   1   6   20.05    1.99 
   4   1  -6   18.37    1.15 
   4   1  -6   22.48    1.67 
  -4   1   6   21.62    1.72 
   3  -1  -6   17.26    1.79 
  -3   1   6   10.58    1.23 
  -3   1   6   11.63    1.20 
   3   1  -6   11.26    1.06 
  -3   1   6   10.54    1.12 
  -3   1   6   11.08    1.36 
  -3   1   6   10.80    1.51 
  -2  -1   6  646.23   29.11 
   2  -1  -6  621.69   29.72 
   2  -1  -6  639.57   29.63 
   2  -1  -6  664.35   30.38 
   2  -1  -6  652.79   30.32 
   2  -1  -6  637.18   29.57 
  -2  -1   6  678.79   29.91 
  -2  -1   6  617.79   29.90 
  -2   1   6  600.02   30.33 
  -2   1   6  600.00   29.75 
  -2   1   6  597.17   29.49 
   2   1  -6  640.94   29.93 
   2   1  -6  594.97   29.94 
   2   1  -6  636.50   29.08 
   2   1  -6  615.50   29.29 
  -2   1   6  601.40   29.59 
   2   1  -6  601.69   29.08 
  -2   1   6  634.17   30.28 
  -1  -1   6  130.45    6.32 
   1  -1  -6  127.01    6.55 
  -1  -1   6  124.72    6.14 
   1  -1  -6  121.60    6.34 
   1  -1  -6  130.73    6.52 
   1  -1  -6  122.09    6.50 
   1  -1  -6  127.10    6.60 
  -1   1   6  128.87    6.34 
  -1   1   6  122.47    6.46 
   1   1  -6  126.98    5.96 
   1   1  -6  124.78    6.20 
   1   1  -6  127.55    6.29 
  -1   1   6  120.37    6.63 
  -1   1   6  131.45    6.48 
   1   1  -6  127.16    6.26 
  -1   1   6  133.00    6.60 
   0  -1  -6   19.40    1.67 
   0  -1   6   19.23    1.47 
   0  -1   6   18.19    1.35 
   0  -1   6   18.02    1.39 
   0  -1  -6   18.40    1.46 
   0  -1  -6   17.97    1.60 
   0  -1  -6   18.99    1.54 
   0   1   6   22.70    1.62 
   0   1   6   22.86    1.50 
   0   1   6   23.20    1.60 
   0   1   6   23.30    1.49 
   0   1  -6   21.50    1.49 
   0   1  -6   23.46    1.40 
   0   1   6   22.87    1.83 
   0   1  -6   22.62    1.57 
   1  -1   6  169.44    9.12 
  -1  -1  -6  178.37    9.07 
  -1  -1  -6  174.15    8.97 
   1  -1   6  184.12    8.93 
  -1  -1  -6  176.72    8.96 
  -1  -1  -6  170.09    9.09 
   1  -1   6  176.99    9.02 
  -1   1  -6  178.99    9.07 
  -1   1  -6  190.22    9.04 
   1   1   6  185.13    9.15 
   1   1   6  178.70    9.15 
  -1   1  -6  187.04    9.06 
   1   1   6  186.31    9.07 
  -2  -1  -6  169.41    8.22 
  -2  -1  -6  169.31    8.26 
  -2  -1  -6  163.01    8.24 
  -2  -1  -6  170.56    8.15 
   2  -1   6  170.85    8.25 
   2  -1   6  159.47    7.79 
   2  -1   6  166.42    8.38 
   2  -1   6  167.20    8.21 
   2   1   6  158.23    8.30 
  -2   1  -6  148.03    8.25 
   2   1   6  152.02    8.16 
  -2   1  -6  145.84    8.19 
   2   1   6  146.29    8.25 
  -2   1  -6  151.41    8.19 
  -3  -1  -6   87.76    5.20 
  -3  -1  -6   89.28    5.17 
  -3  -1  -6   87.61    5.14 
   3  -1   6   84.97    4.87 
   3  -1   6   88.71    5.25 
   3  -1   6   87.14    5.16 
   3  -1   6   89.21    5.33 
  -3  -1  -6   93.95    5.14 
  -3   1  -6  100.99    5.46 
  -3   1  -6   99.35    5.33 
   3   1   6   93.66    5.14 
  -3   1  -6  101.80    5.25 
   3   1   6  105.20    5.46 
   3   1   6  100.26    5.31 
  -4  -1  -6   48.00    3.16 
  -4  -1  -6   43.25    3.19 
  -4  -1  -6   45.98    3.14 
   4  -1   6   45.37    3.18 
   4  -1   6   48.11    3.03 
  -4  -1  -6   49.19    3.15 
   4  -1   6   48.28    3.40 
   4  -1   6   50.38    3.34 
   4   1   6   42.03    3.19 
   4   1   6   44.96    3.11 
  -4   1  -6   45.99    3.14 
   4   1   6   44.72    3.34 
  -4   1  -6   47.69    3.33 
  -4   1  -6   47.49    3.56 
   5  -1   6   17.63    2.06 
  -5  -1  -6   20.25    2.41 
  -5  -1  -6   18.76    2.12 
   5  -1   6   18.85    2.56 
  -5  -1  -6   19.65    2.18 
   5  -1   6   19.17    2.27 
   5  -1   6   18.74    2.54 
  -5  -1  -6   19.10    2.13 
  -5   1  -6   22.08    2.46 
   5   1   6   21.32    2.34 
   5   1   6   23.22    2.38 
  -5   1  -6   21.77    2.15 
  -5   1  -6   23.77    2.95 
   5   1   6   22.55    2.64 
  -6  -1  -6   51.11    3.84 
  -6  -1  -6   48.32    3.41 
   6  -1   6   46.68    3.46 
  -6  -1  -6   45.93    3.53 
   6  -1   6   46.34    3.57 
   6  -1   6   47.19    3.92 
   6  -1   6   48.81    4.01 
   6  -1   6   41.84    4.25 
  -6   1  -6   40.76    4.07 
   6   1   6   37.93    3.88 
   6   1   6   35.95    3.36 
  -6   1  -6   40.46    3.48 
  -6   1  -6   38.74    3.60 
  -7  -1  -6  100.50    6.39 
  -7  -1  -6  100.36    6.75 
   7  -1   6  104.88    7.00 
   7  -1   6  100.62    7.37 
   7  -1   6  104.34    6.37 
   7  -1   6  104.60    6.82 
  -7  -1  -6  102.45    6.55 
  -7   1  -6  112.25    6.66 
  -7   1  -6  112.78    7.26 
   7   1   6  109.48    7.11 
  -7   1  -6  106.22    6.69 
   8  -1   6   17.82    3.20 
  -8  -1  -6   14.89    2.46 
   8  -1   6   11.93    3.27 
  -8  -1  -6   12.07    2.25 
  -8  -1  -6   12.25    2.75 
   8  -1   6   17.29    2.62 
   8  -1   6   13.03    3.11 
   8   1   6   16.57    2.84 
  -8   1  -6   19.16    2.77 
  -8   1  -6   16.97    2.52 
   8   1   6   17.14    2.50 
   8   1   6   16.12    3.35 
  -9  -1  -6    5.82    3.14 
  -9  -1  -6    2.37    2.39 
   9  -1   6    4.72    3.54 
  -9  -1  -6    7.54    2.42 
   9  -1   6    7.99    2.93 
   9  -1   6    7.91    2.59 
   9  -1   6    3.51    3.18 
   9   1   6    7.97    2.51 
   9   1   6    2.68    2.64 
   9   1   6    3.89    3.79 
  -9   1  -6    2.93    2.44 
  -9   1  -6    6.24    3.51 
 -10  -1  -6   24.92    3.63 
 -10  -1  -6   27.09    5.01 
  10  -1   6   20.08    4.40 
  10  -1   6   21.55    5.21 
  10  -1   6   25.77    4.07 
  10   1   6   23.85    4.71 
 -10   1  -6   27.06    4.27 
 -10   1  -6   27.22    4.18 
  10   1   6   33.80    4.87 
 -10   1  -6   24.06    5.13 
  10   1   6   33.11    4.10 
  11  -2  -6    6.53    3.70 
 -11  -2   6    5.30    1.79 
  11  -2  -6    1.00    4.64 
  11  -2  -6    4.01    3.19 
 -11   2   6    3.54    4.47 
  11   2  -6    4.01    2.66 
 -11   2   6   -0.36    2.56 
  11   2  -6    3.80    2.94 
  10  -2  -6   16.25    3.09 
 -10  -2   6   15.66    1.81 
  10  -2  -6   18.24    3.47 
  10  -2  -6   13.47    3.21 
 -10  -2   6   14.07    1.64 
 -10  -2   6   14.97    2.43 
 -10   2   6   13.75    3.91 
 -10   2   6   12.52    2.77 
  10   2  -6   13.20    2.68 
  10   2  -6   13.07    2.18 
  10   2  -6   18.54    2.61 
 -10   2   6   13.97    2.65 
  10   2  -6   13.84    2.53 
  10   2  -6   14.95    2.75 
  -9  -2   6   69.17    4.02 
   9  -2  -6   66.34    5.65 
   9  -2  -6   71.12    5.71 
  -9  -2   6   66.81    4.45 
  -9  -2   6   60.00    3.87 
   9  -2  -6   61.86    6.83 
   9  -2  -6   71.02    5.85 
  -9   2   6   71.64    5.31 
   9   2  -6   68.74    4.68 
   9   2  -6   74.71    4.90 
  -9   2   6   74.81    6.67 
   9   2  -6   69.70    4.39 
   9   2  -6   73.52    5.26 
   9   2  -6   78.06    4.68 
  -8  -2   6  111.39    5.77 
  -8  -2   6  115.67    6.06 
   8  -2  -6  126.06    7.48 
   8  -2  -6  123.07    6.89 
   8  -2  -6  114.00    8.08 
  -8  -2   6  121.53    6.18 
  -8  -2   6  129.62    5.90 
   8  -2  -6  123.41    7.26 
   8  -2  -6  131.59    7.26 
  -8   2   6  104.18    6.92 
  -8   2   6  104.87    6.80 
   8   2  -6  104.86    6.08 
   8   2  -6  105.81    6.24 
   8   2  -6  107.97    6.23 
   8   2  -6   98.62    6.11 
  -8   2   6  108.54    7.76 
   7  -2  -6   70.98    5.36 
  -7  -2   6   73.39    4.16 
  -7  -2   6   75.08    4.24 
   7  -2  -6   71.20    5.11 
   7  -2  -6   83.00    5.35 
   7  -2  -6   72.81    6.02 
   7  -2  -6   71.18    4.89 
   7   2  -6   83.92    4.34 
  -7   2   6   78.96    5.56 
   7   2  -6   79.73    4.35 
  -7   2   6   76.51    5.01 
  -7   2   6   78.36    5.07 
   7   2  -6   82.13    4.24 
   7   2  -6   80.44    4.89 
  -7   2   6   82.42    5.87 
   6  -2  -6   15.68    2.20 
  -6  -2   6   15.40    1.30 
  -6  -2   6   12.66    1.21 
   6  -2  -6   12.58    1.76 
   6  -2  -6   12.94    2.01 
   6  -2  -6   15.83    1.94 
   6  -2  -6   14.53    2.66 
  -6   2   6   16.25    1.97 
   6   2  -6   13.26    1.86 
   6   2  -6   14.12    1.27 
  -6   2   6   11.86    2.20 
  -6   2   6   15.36    1.93 
  -6   2   6   15.76    1.99 
   6   2  -6   13.00    1.16 
  -6   2   6   14.13    2.21 
   5  -2  -6  105.38    5.86 
   5  -2  -6   98.77    5.58 
   5  -2  -6  101.25    5.73 
   5  -2  -6   97.36    5.49 
   5  -2  -6  106.23    6.32 
  -5   2   6   90.10    5.82 
   5   2  -6   88.84    4.70 
  -5   2   6   90.99    5.52 
  -5   2   6   90.65    5.56 
  -5   2   6   90.46    5.81 
   5   2  -6   98.23    4.76 
   5   2  -6   90.04    5.23 
  -5   2   6   96.04    5.34 
   4  -2  -6   56.91    3.67 
   4  -2  -6   54.74    3.62 
   4  -2  -6   57.34    3.84 
   4  -2  -6   57.20    4.25 
   4  -2  -6   58.10    3.83 
  -4   2   6   52.18    3.94 
   4   2  -6   55.90    3.37 
  -4   2   6   56.69    3.71 
  -4   2   6   61.16    3.53 
  -4   2   6   58.82    4.04 
  -4   2   6   59.59    3.69 
   3  -2  -6  172.62    8.77 
   3  -2  -6  163.93    8.93 
   3  -2  -6  164.24    8.73 
   3  -2  -6  163.49    8.45 
   3  -2  -6  164.81    8.61 
  -3   2   6  165.67    8.68 
  -3   2   6  170.05    8.39 
  -3   2   6  158.36    8.79 
   3   2  -6  172.07    7.97 
  -3   2   6  165.97    8.70 
   3   2  -6  154.20    7.93 
  -3   2   6  159.29    8.59 
   2  -2  -6    5.59    1.47 
   2  -2  -6    6.21    1.17 
  -2  -2   6    6.35    0.70 
  -2  -2   6    5.69    0.53 
   2  -2  -6    4.72    0.92 
   2  -2  -6    5.93    1.24 
   2  -2  -6    5.31    0.92 
  -2  -2   6    5.44    0.69 
  -2   2   6    8.50    1.07 
  -2   2   6    6.79    1.01 
  -2   2   6    8.08    1.38 
  -2   2   6    8.56    1.36 
   1  -2  -6  143.29    7.78 
   1  -2  -6  140.54    7.92 
   1  -2  -6  143.55    8.12 
  -1  -2   6  140.43    7.55 
   1  -2  -6  146.84    8.01 
  -1  -2   6  146.97    7.48 
  -1  -2   6  148.25    7.67 
  -1  -2   6  145.28    7.65 
   1  -2  -6  142.24    7.91 
  -1   2   6  162.63    7.97 
   1   2  -6  159.75    7.66 
  -1   2   6  154.75    7.75 
  -1   2   6  157.26    8.08 
   1   2  -6  163.82    7.67 
  -1   2   6  163.75    8.04 
  -1   2   6  155.04    8.23 
   1   2  -6  164.47    7.32 
   1   2  -6  165.68    7.62 
   0  -2   6  483.75   23.08 
   0  -2  -6  473.24   23.59 
   0  -2  -6  490.42   23.66 
   0  -2  -6  498.94   23.32 
   0  -2   6  502.80   22.87 
   0  -2  -6  480.06   23.20 
   0  -2   6  483.77   23.48 
   0  -2   6  495.46   23.37 
   0   2   6  475.13   23.01 
   0   2   6  470.21   23.54 
   0   2  -6  495.96   22.49 
   0   2   6  482.82   23.43 
   0   2   6  458.57   23.04 
   0   2   6  470.35   23.68 
   0   2  -6  457.66   23.41 
   0   2  -6  475.21   22.94 
   0   2  -6  494.93   23.43 
  -1  -2  -6  200.18   10.37 
   1  -2   6  206.79   10.26 
  -1  -2  -6  207.89   10.37 
  -1  -2  -6  212.26   10.41 
   1  -2   6  203.67    9.70 
  -1  -2  -6  202.57   10.41 
   1  -2   6  210.98   10.18 
   1  -2   6  207.11   10.43 
   1  -2   6  194.41   10.44 
   1   2   6  201.26   10.17 
  -1   2  -6  204.04   10.37 
   1   2   6  195.57   10.15 
   1   2   6  208.86   10.62 
   1   2   6  198.07   10.31 
  -1   2  -6  198.91   10.28 
   1   2   6  193.25   10.42 
  -1   2  -6  207.88    9.65 
  -2  -2  -6   77.16    4.39 
  -2  -2  -6   75.21    4.37 
   2  -2   6   79.96    4.25 
   2  -2   6   77.09    4.48 
   2  -2   6   76.55    3.80 
   2  -2   6   83.45    4.41 
  -2  -2  -6   75.23    4.26 
   2  -2   6   75.40    4.69 
  -2  -2  -6   78.55    4.32 
   2   2   6   66.03    4.06 
  -2   2  -6   69.51    4.48 
   2   2   6   64.19    4.51 
  -2   2  -6   65.73    3.73 
  -2   2  -6   67.39    4.31 
   2   2   6   66.75    4.32 
   2   2   6   65.21    4.11 
   3  -2   6    0.42    0.82 
   3  -2   6    0.29    1.28 
  -3  -2  -6    0.46    0.73 
  -3  -2  -6   -0.03    0.79 
  -3  -2  -6   -0.60    0.62 
   3  -2   6   -0.15    0.54 
   3  -2   6    0.41    0.89 
   3   2   6    1.24    1.13 
  -3   2  -6    2.16    0.68 
  -3   2  -6    1.67    0.96 
   3   2   6    2.05    0.83 
  -3   2  -6    1.66    1.03 
  -4  -2  -6   10.77    1.70 
  -4  -2  -6    9.97    1.55 
   4  -2   6    8.05    1.99 
   4  -2   6    8.55    1.32 
   4  -2   6    7.42    1.55 
  -4  -2  -6    8.04    1.42 
   4  -2   6    8.99    1.57 
  -4  -2  -6    9.00    1.32 
  -4   2  -6   10.59    2.04 
  -4   2  -6    9.94    1.49 
   4   2   6    8.32    1.28 
   4   2   6    9.39    1.86 
   4   2   6   10.59    1.63 
  -4   2  -6   11.00    1.74 
  -5  -2  -6   96.18    5.75 
  -5  -2  -6   89.32    5.73 
  -5  -2  -6   92.66    5.53 
   5  -2   6   92.40    5.67 
   5  -2   6   87.50    6.34 
   5  -2   6   90.84    6.08 
   5  -2   6   95.37    5.95 
  -5  -2  -6   89.88    5.70 
   5  -2   6   87.14    5.43 
  -5   2  -6   91.12    6.20 
   5   2   6   95.76    5.52 
  -5   2  -6  100.72    6.02 
   5   2   6  102.32    5.92 
  -5   2  -6   94.66    5.71 
   5   2   6   95.74    6.26 
  -6  -2  -6    3.16    1.38 
   6  -2   6    3.23    1.46 
   6  -2   6    3.09    2.11 
   6  -2   6    5.74    1.92 
   6  -2   6    3.88    1.47 
   6  -2   6    4.06    2.47 
  -6  -2  -6    4.81    1.79 
  -6  -2  -6    3.47    1.54 
  -6   2  -6    4.21    1.66 
   6   2   6    4.02    1.45 
  -6   2  -6    0.98    1.75 
   6   2   6    3.14    2.17 
  -6   2  -6    4.71    1.55 
  -7  -2  -6    8.88    2.18 
   7  -2   6    9.82    2.60 
   7  -2   6    5.09    2.28 
   7  -2   6    9.68    2.16 
  -7  -2  -6    9.92    2.44 
   7  -2   6   10.54    3.07 
  -7  -2  -6   10.31    2.01 
   7   2   6   13.78    3.20 
  -7   2  -6    8.06    1.84 
   7   2   6   10.80    2.11 
  -7   2  -6   13.61    2.56 
  -8  -2  -6   23.25    3.30 
   8  -2   6   20.88    3.74 
  -8  -2  -6   22.36    3.42 
   8  -2   6   23.97    4.21 
  -8  -2  -6   24.80    3.34 
   8  -2   6   22.61    3.15 
   8  -2   6   19.68    3.47 
   8   2   6   23.13    2.94 
  -8   2  -6   24.75    4.05 
   8   2   6   32.26    4.10 
   8   2   6   28.78    4.23 
  -8   2  -6   29.03    3.59 
  -9  -2  -6  126.93    7.88 
   9  -2   6  118.60    9.10 
  -9  -2  -6  123.52    8.65 
  -9  -2  -6  126.44    8.44 
   9  -2   6  109.63   10.17 
   9  -2   6  133.64    8.28 
  -9   2  -6  106.56    8.24 
  -9   2  -6  106.70    9.49 
   9   2   6  106.04    7.90 
   9   2   6  114.15   10.19 
  -9   2  -6  110.01    8.23 
 -10  -2  -6    9.55    2.98 
 -10  -2  -6    0.57    4.03 
  10  -2   6    3.16    5.20 
  10  -2   6    7.42    3.60 
  10  -2   6    8.83    4.34 
 -10   2  -6    3.65    3.45 
  10   2   6    9.67    3.26 
  10   2   6   10.66    3.94 
 -10   2  -6   14.15    5.26 
  10  -3  -6   17.99    5.10 
  10  -3  -6   18.48    4.30 
 -10  -3   6   17.68    2.72 
  10  -3  -6   11.75    3.66 
  10  -3  -6   18.44    4.41 
  10   3  -6   24.47    3.54 
  10   3  -6   23.21    2.70 
  10   3  -6   22.27    2.63 
 -10   3   6   23.37    3.65 
 -10   3   6   20.66    5.01 
   9  -3  -6   33.67    4.40 
   9  -3  -6   32.52    5.20 
  -9  -3   6   32.40    3.17 
  -9  -3   6   28.86    3.05 
   9  -3  -6   21.99    3.45 
   9  -3  -6   23.14    3.87 
   9   3  -6   25.68    3.22 
  -9   3   6   27.46    3.64 
   9   3  -6   31.79    3.10 
   9   3  -6   27.77    3.69 
  -9   3   6   25.56    4.39 
   9   3  -6   25.40    2.96 
  -9   3   6   29.18    4.10 
   9   3  -6   25.16    2.61 
   8  -3  -6    2.61    2.22 
  -8  -3   6    2.55    1.22 
   8  -3  -6    0.72    2.47 
   8  -3  -6   -1.62    1.62 
   8  -3  -6    4.66    3.19 
   8  -3  -6    1.09    1.90 
  -8  -3   6   -0.42    1.21 
  -8   3   6   -0.97    1.53 
  -8   3   6   -0.78    1.81 
  -8   3   6    0.65    1.74 
   8   3  -6    0.93    1.12 
   8   3  -6    2.06    1.56 
   8   3  -6    0.80    0.90 
  -8   3   6    0.78    2.62 
   8   3  -6    1.99    1.17 
   8   3  -6    1.05    1.32 
  -8   3   6   -1.85    2.73 
  -7  -3   6  117.07    6.14 
   7  -3  -6  114.62    7.38 
   7  -3  -6  122.16    7.68 
   7  -3  -6  111.28    7.76 
   7  -3  -6  127.57    8.71 
  -7  -3   6  117.56    6.06 
  -7   3   6  121.43    7.41 
  -7   3   6  120.69    7.63 
  -7   3   6  121.14    8.03 
   7   3  -6  126.36    6.33 
   7   3  -6  119.77    7.00 
   7   3  -6  120.22    6.15 
   6  -3  -6   52.14    4.13 
  -6  -3   6   54.20    2.97 
   6  -3  -6   53.31    4.44 
   6  -3  -6   65.08    4.78 
   6  -3  -6   55.73    5.34 
  -6  -3   6   52.59    2.83 
  -6   3   6   45.15    3.97 
  -6   3   6   53.81    4.86 
   6   3  -6   50.26    3.01 
  -6   3   6   53.95    4.16 
   6   3  -6   48.88    2.83 
   5  -3  -6   26.36    2.67 
   5  -3  -6   27.10    2.83 
   5  -3  -6   20.81    3.12 
  -5  -3   6   23.07    1.69 
   5  -3  -6   26.71    3.10 
  -5  -3   6   25.26    1.57 
   5  -3  -6   26.53    3.16 
  -5   3   6   22.86    2.69 
  -5   3   6   22.65    3.03 
   5   3  -6   25.92    1.51 
  -5   3   6   27.07    2.54 
   5   3  -6   25.53    1.73 
  -5   3   6   30.54    3.58 
  -5   3   6   26.45    2.86 
   4  -3  -6   43.33    3.31 
   4  -3  -6   45.85    3.36 
   4  -3  -6   46.67    4.23 
  -4  -3   6   45.04    2.39 
  -4  -3   6   42.90    2.50 
   4  -3  -6   44.85    3.61 
   4  -3  -6   42.21    3.67 
   4   3  -6   40.48    2.34 
  -4   3   6   44.65    3.15 
  -4   3   6   40.15    3.42 
  -4   3   6   45.01    3.93 
  -4   3   6   42.23    3.86 
   4   3  -6   45.64    2.56 
  -4   3   6   43.12    3.35 
  -3  -3   6  118.07    5.84 
  -3  -3   6  106.36    5.77 
   3  -3  -6  109.59    6.73 
   3  -3  -6  111.56    6.77 
  -3  -3   6  113.14    5.85 
   3  -3  -6  112.47    6.55 
   3  -3  -6  107.62    7.12 
   3  -3  -6  114.60    6.45 
  -3   3   6  123.69    7.12 
  -3   3   6  118.24    6.64 
   3   3  -6  125.22    6.00 
   3   3  -6  120.73    5.80 
  -3   3   6  115.34    6.79 
   3   3  -6  121.85    5.92 
  -3   3   6  117.23    6.35 
  -3   3   6  119.72    6.70 
   3   3  -6  115.61    5.88 
   2  -3  -6   32.73    2.48 
   2  -3  -6   33.77    2.65 
   2  -3  -6   33.06    3.14 
   2  -3  -6   34.37    2.50 
  -2   3   6   22.14    2.28 
  -2   3   6   24.25    2.45 
   2   3  -6   25.21    2.01 
   2   3  -6   24.29    1.82 
   2   3  -6   23.97    1.99 
  -2   3   6   22.44    2.69 
  -2   3   6   27.48    2.96 
   2   3  -6   22.51    1.77 
   1  -3  -6  177.31    9.05 
   1  -3  -6  174.43    9.20 
   1  -3  -6  177.51    8.89 
   1  -3  -6  176.39    9.15 
  -1  -3   6  176.52    8.75 
  -1  -3   6  171.76    8.58 
  -1  -3   6  176.13    8.57 
  -1  -3   6  170.60    8.84 
   1  -3  -6  164.46    9.30 
  -1   3   6  167.95    9.11 
  -1   3   6  167.06    8.98 
   1   3  -6  161.79    8.29 
   1   3  -6  165.84    8.64 
  -1   3   6  166.98    9.13 
  -1   3   6  163.12    9.44 
  -1   3   6  157.38    8.71 
   1   3  -6  167.66    8.65 
   1   3  -6  166.51    8.65 
   0  -3   6   18.67    1.86 
   0  -3   6   17.62    1.79 
   0  -3  -6   18.64    1.98 
   0  -3   6   17.65    1.62 
   0  -3   6   18.99    2.21 
   0  -3  -6   19.90    2.53 
   0  -3  -6   18.52    1.93 
   0  -3  -6   16.61    2.21 
   0   3  -6   15.28    1.57 
   0   3   6   16.18    1.85 
   0   3   6   16.12    1.94 
   0   3   6   15.32    2.03 
   0   3  -6   16.37    2.00 
   0   3  -6   17.21    1.29 
   0   3  -6   16.68    1.74 
   0   3   6   15.94    1.83 
   0   3   6   17.47    2.41 
   1  -3   6   61.98    4.02 
  -1  -3  -6   63.86    4.03 
  -1  -3  -6   61.15    4.24 
   1  -3   6   63.91    3.79 
   1  -3   6   64.66    4.47 
   1  -3   6   63.34    3.47 
  -1  -3  -6   62.68    3.99 
   1   3   6   64.83    3.91 
   1   3   6   60.66    4.01 
   1   3   6   61.18    4.02 
  -1   3  -6   61.65    4.16 
   1   3   6   63.67    4.54 
  -1   3  -6   59.40    3.29 
  -1   3  -6   58.96    3.92 
  -1   3  -6   64.98    4.06 
  -2  -3  -6  206.10   11.07 
   2  -3   6  220.60   11.54 
  -2  -3  -6  220.32   11.11 
   2  -3   6  221.55   10.96 
  -2  -3  -6  210.10   11.02 
   2  -3   6  223.27   10.91 
   2  -3   6  214.42   10.35 
   2  -3   6  206.99   11.16 
  -2  -3  -6  216.08   11.01 
  -2   3  -6  205.56   10.96 
  -2   3  -6  208.07   10.22 
  -2   3  -6  212.51   11.10 
  -2   3  -6  204.89   11.15 
   2   3   6  200.90   10.71 
   2   3   6  208.74   10.84 
   2   3   6  208.46   11.40 
   2   3   6  194.94   10.81 
   2   3   6  207.73   11.14 
   3  -3   6    7.64    1.55 
  -3  -3  -6   10.39    1.55 
   3  -3   6    8.67    1.20 
   3  -3   6   10.13    2.34 
   3  -3   6    7.11    1.34 
   3  -3   6    9.64    1.63 
  -3  -3  -6    7.23    1.62 
  -3  -3  -6    7.96    1.44 
  -3  -3  -6    8.30    1.60 
  -3   3  -6    6.15    1.48 
   3   3   6    4.96    1.81 
   3   3   6    7.48    1.59 
  -3   3  -6    5.33    1.25 
   3   3   6    5.12    1.12 
  -3   3  -6    7.61    2.00 
   3   3   6    6.02    1.22 
  -3   3  -6    6.22    1.01 
   4  -3   6   94.09    6.09 
   4  -3   6   93.13    5.66 
   4  -3   6   98.25    7.30 
  -4  -3  -6  102.42    6.25 
  -4  -3  -6   95.18    6.08 
  -4  -3  -6   94.05    5.92 
   4  -3   6   96.86    6.57 
   4  -3   6   95.84    6.30 
  -4  -3  -6   99.87    6.36 
   4   3   6  114.05    6.03 
   4   3   6  108.89    6.97 
  -4   3  -6  107.09    6.50 
  -4   3  -6  114.08    6.92 
  -4   3  -6  113.91    5.64 
   4   3   6  114.65    6.43 
   5  -3   6   44.74    3.38 
  -5  -3  -6   40.28    3.35 
  -5  -3  -6   41.91    3.69 
   5  -3   6   41.48    5.36 
   5  -3   6   38.03    3.83 
   5  -3   6   41.75    3.61 
   5  -3   6   39.45    4.19 
  -5  -3  -6   40.03    3.66 
  -5   3  -6   34.13    3.85 
  -5   3  -6   45.05    3.23 
  -5   3  -6   40.59    4.45 
   5   3   6   35.59    4.58 
   5   3   6   37.58    3.24 
   6  -3   6   12.21    2.76 
   6  -3   6   13.21    2.55 
   6  -3   6   19.33    4.16 
  -6  -3  -6   17.37    2.66 
   6  -3   6   15.62    2.31 
   6  -3   6   15.35    2.44 
  -6  -3  -6   13.33    1.97 
  -6  -3  -6   14.76    2.44 
  -6   3  -6    9.06    2.33 
   6   3   6    9.99    3.16 
  -6   3  -6   13.07    2.30 
   6   3   6    8.97    1.79 
  -6   3  -6    8.49    2.75 
   7  -3   6   59.57    5.42 
   7  -3   6   69.58    6.11 
  -7  -3  -6   61.25    4.83 
  -7  -3  -6   63.08    5.47 
   7  -3   6   67.38    7.52 
   7  -3   6   67.98    6.35 
  -7  -3  -6   62.25    5.86 
  -7   3  -6   73.66    6.08 
  -7   3  -6   87.45    7.08 
   7   3   6   72.88    7.36 
   7   3   6   79.45    5.32 
   8  -3   6   59.26    6.94 
  -8  -3  -6   60.60    6.51 
   8  -3   6   46.34    5.67 
   8  -3   6   64.14    7.93 
  -8  -3  -6   67.51    5.90 
  -8  -3  -6   60.82    4.97 
  -8   3  -6   52.31    6.98 
   8   3   6   53.06    5.22 
  -8   3  -6   62.89    5.76 
  -8   3  -6   54.32    6.00 
   8   3   6   46.64    6.67 
  -9  -3  -6   10.47    2.63 
   9  -3   6    8.89    3.74 
  -9  -3  -6   14.62    3.68 
   9  -3   6    6.89    5.53 
   9  -3   6   12.04    4.27 
  -9   3  -6   12.53    4.70 
  -9   3  -6   11.46    3.79 
   9   3   6   11.09    3.28 
  10  -4  -6   34.13    7.11 
  10  -4  -6   32.88    6.14 
  10  -4  -6   24.88    5.28 
  10   4  -6   21.00    3.67 
 -10   4   6   20.86    3.78 
 -10   4   6   20.84    5.96 
   9  -4  -6   21.57    4.41 
   9  -4  -6   26.09    4.33 
   9  -4  -6   19.23    4.64 
   9  -4  -6   23.64    5.63 
   9   4  -6   14.87    2.93 
  -9   4   6   14.85    3.70 
   9   4  -6   10.21    2.07 
  -9   4   6   11.88    2.94 
  -9   4   6   11.32    4.84 
   8  -4  -6   85.76    7.04 
  -8  -4   6   88.05    5.04 
   8  -4  -6   89.30    8.70 
   8  -4  -6   95.37    8.99 
   8  -4  -6   79.39    7.90 
  -8  -4   6   90.29    5.33 
  -8   4   6   91.57    6.76 
  -8   4   6   96.21    8.11 
   8   4  -6   90.74    6.45 
  -8   4   6   95.65    7.31 
   8   4  -6   99.77    5.46 
   7  -4  -6   24.30    3.62 
  -7  -4   6   30.71    2.55 
   7  -4  -6   23.46    4.42 
   7  -4  -6   26.97    3.61 
  -7  -4   6   27.20    2.13 
   7  -4  -6   23.80    3.98 
   7   4  -6   21.28    1.89 
  -7   4   6   21.00    3.04 
  -7   4   6   24.03    3.47 
   7   4  -6   19.55    2.37 
  -7   4   6   21.75    3.18 
  -7   4   6   19.85    3.95 
   6  -4  -6   24.08    3.50 
  -6  -4   6   23.40    2.04 
   6  -4  -6   20.64    3.13 
  -6  -4   6   20.11    2.60 
   6  -4  -6   24.97    4.15 
   6  -4  -6   25.84    3.51 
   6   4  -6   30.19    1.90 
  -6   4   6   34.54    4.15 
  -6   4   6   27.61    3.47 
  -6   4   6   25.48    4.09 
   6   4  -6   31.44    2.53 
   6   4  -6   33.83    2.41 
   5  -4  -6   54.61    4.83 
  -5  -4   6   53.71    2.65 
  -5  -4   6   51.07    2.90 
   5  -4  -6   53.60    4.27 
   5  -4  -6   50.06    4.58 
  -5  -4   6   48.51    2.65 
  -5   4   6   38.59    3.65 
  -5   4   6   48.21    5.09 
   5   4  -6   42.69    2.74 
  -5   4   6   44.01    4.90 
  -5   4   6   45.79    4.36 
  -5   4   6   41.68    4.10 
   5   4  -6   46.87    3.12 
   5   4  -6   47.58    3.25 
   4  -4  -6   13.57    2.20 
   4  -4  -6   15.80    2.55 
   4  -4  -6   14.11    3.16 
   4  -4  -6   12.38    2.06 
   4  -4  -6   17.35    2.75 
  -4  -4   6   13.79    1.40 
   4   4  -6   15.01    1.75 
  -4   4   6   13.44    2.77 
  -4   4   6   13.68    2.74 
  -4   4   6   16.57    2.53 
   4   4  -6   15.84    1.85 
  -4   4   6   11.72    1.95 
  -4   4   6   13.50    1.83 
   4   4  -6   15.27    1.42 
   4   4  -6   14.70    1.48 
  -3  -4   6    0.38    0.74 
   3  -4  -6   -1.45    1.21 
  -3  -4   6    0.43    1.05 
   3  -4  -6    0.56    1.22 
   3  -4  -6    0.87    1.63 
   3  -4  -6   -0.81    1.72 
   3  -4  -6    0.47    1.32 
   3   4  -6    0.86    0.66 
   3   4  -6    0.69    0.90 
   3   4  -6    1.77    0.96 
  -3   4   6    1.48    1.07 
   3   4  -6    2.00    1.03 
  -3   4   6    1.00    1.25 
  -3   4   6    4.49    2.08 
   3   4  -6    2.44    0.81 
  -3   4   6    3.48    1.86 
  -3   4   6    1.11    1.24 
   2  -4  -6   74.66    4.87 
   2  -4  -6   76.49    4.99 
  -2  -4   6   80.15    4.95 
  -2  -4   6   77.70    4.50 
   2  -4  -6   76.43    5.08 
  -2  -4   6   80.14    4.44 
   2  -4  -6   79.36    5.45 
   2  -4  -6   75.09    5.87 
  -2  -4   6   75.82    4.23 
  -2   4   6   65.41    4.78 
   2   4  -6   73.12    4.37 
   2   4  -6   66.03    4.44 
   2   4  -6   73.04    4.27 
   2   4  -6   70.53    4.59 
  -2   4   6   70.24    4.65 
  -2   4   6   66.46    5.18 
  -2   4   6   75.50    5.12 
   2   4  -6   72.41    4.49 
  -2   4   6   70.02    5.59 
   1  -4  -6   72.39    5.13 
   1  -4  -6   78.88    5.46 
   1  -4  -6   77.01    5.15 
   1  -4  -6   72.50    5.88 
  -1  -4   6   75.74    4.77 
  -1  -4   6   81.29    5.36 
  -1  -4   6   73.72    4.56 
  -1  -4   6   72.36    4.76 
   1  -4  -6   78.66    5.10 
   1   4  -6   79.18    4.70 
   1   4  -6   81.19    4.93 
  -1   4   6   87.17    5.15 
   1   4  -6   85.47    5.02 
  -1   4   6   82.80    5.01 
  -1   4   6   79.15    5.91 
  -1   4   6   83.49    5.35 
   1   4  -6   85.06    4.76 
   1   4  -6   82.35    4.45 
  -1   4   6   79.77    5.41 
   0  -4  -6  191.68   10.29 
   0  -4  -6  185.81   10.11 
   0  -4  -6  186.10   10.07 
   0  -4  -6  184.47   10.44 
   0  -4   6  196.48    9.73 
   0  -4   6  183.19    9.87 
   0  -4   6  186.05   10.19 
   0  -4   6  184.34    9.64 
   0   4   6  181.08    9.92 
   0   4  -6  175.73    9.85 
   0   4   6  177.34    9.75 
   0   4  -6  185.71    9.81 
   0   4   6  177.11    9.99 
   0   4   6  190.29   10.20 
   0   4  -6  181.36    9.71 
   0   4   6  183.75   10.72 
   0   4  -6  181.63    9.86 
   0   4  -6  186.77    9.20 
  -1  -4  -6   94.06    6.15 
   1  -4   6   87.52    5.55 
   1  -4   6   91.07    5.32 
  -1  -4  -6   90.59    5.67 
  -1  -4  -6   94.73    5.62 
   1  -4   6   97.36    5.05 
   1  -4   6   91.64    6.28 
   1  -4   6   91.25    5.56 
  -1  -4  -6   95.76    5.99 
  -1   4  -6   86.95    5.71 
   1   4   6   84.09    5.69 
  -1   4  -6   91.69    4.84 
  -1   4  -6   82.65    5.44 
   1   4   6   86.33    6.24 
   1   4   6   85.55    5.41 
  -1   4  -6   88.61    5.71 
   1   4   6   89.61    5.54 
   1   4   6   86.14    5.51 
  -1   4  -6   85.66    5.35 
   2  -4   6   12.94    1.95 
  -2  -4  -6   17.56    2.22 
  -2  -4  -6   16.92    2.27 
   2  -4   6   15.57    2.77 
   2  -4   6   17.08    2.30 
   2  -4   6   15.01    1.93 
  -2  -4  -6   13.10    2.22 
  -2  -4  -6   14.92    2.48 
   2  -4   6   13.52    1.62 
  -2   4  -6   13.78    2.47 
  -2   4  -6   12.82    1.91 
   2   4   6   10.32    1.81 
  -2   4  -6   11.83    1.55 
   2   4   6   14.89    2.87 
   2   4   6   12.11    2.07 
   2   4   6   14.79    2.01 
  -2   4  -6   11.52    1.99 
   2   4   6   13.31    1.84 
  -3  -4  -6   53.74    4.09 
   3  -4   6   43.72    4.27 
   3  -4   6   48.38    3.87 
   3  -4   6   49.81    5.27 
  -3  -4  -6   51.56    4.25 
  -3  -4  -6   51.34    3.83 
   3  -4   6   52.48    3.51 
   3   4   6   54.68    5.35 
  -3   4  -6   54.67    3.30 
   3   4   6   48.06    3.67 
  -3   4  -6   50.10    4.25 
   3   4   6   50.62    3.75 
  -3   4  -6   48.38    4.46 
   4  -4   6    3.61    1.35 
  -4  -4  -6    2.74    1.30 
   4  -4   6    4.25    1.64 
   4  -4   6    2.21    1.58 
  -4  -4  -6    3.48    1.81 
  -4  -4  -6    3.14    1.74 
   4  -4   6    3.41    2.93 
  -4   4  -6    3.20    1.63 
   4   4   6    3.01    1.33 
  -4   4  -6    1.09    1.99 
  -4   4  -6    3.97    1.98 
   4   4   6    2.93    2.55 
  -4   4  -6    3.73    1.23 
   5  -4   6   10.12    2.41 
   5  -4   6   13.12    2.17 
   5  -4   6   12.51    2.50 
  -5  -4  -6    7.54    2.51 
  -5  -4  -6   11.38    1.87 
  -5  -4  -6    9.69    2.42 
   5  -4   6   11.74    2.89 
   5   4   6   13.33    1.96 
  -5   4  -6   14.51    1.96 
  -5   4  -6   12.01    2.52 
  -5   4  -6   19.01    3.32 
   5   4   6   14.84    3.65 
  -6  -4  -6   21.13    3.26 
   6  -4   6   20.56    2.86 
  -6  -4  -6   18.24    2.47 
  -6  -4  -6   17.45    3.01 
   6  -4   6   16.68    3.35 
   6  -4   6   16.59    3.18 
   6  -4   6   15.60    4.22 
   6   4   6   18.04    2.60 
  -6   4  -6   22.69    2.67 
  -6   4  -6   19.68    3.97 
   6   4   6   23.15    4.68 
  -6   4  -6   15.20    3.00 
  -7  -4  -6   46.16    4.99 
   7  -4   6   38.95    5.06 
  -7  -4  -6   37.57    4.17 
  -7  -4  -6   45.01    5.34 
   7  -4   6   45.64    6.82 
   7  -4   6   42.82    5.12 
  -7   4  -6   50.20    6.89 
  -7   4  -6   46.29    5.93 
   7   4   6   43.29    4.40 
   7   4   6   50.61    6.75 
  -8  -4  -6   19.67    3.99 
   8  -4   6   22.97    3.93 
   8  -4   6   21.24    4.82 
   8  -4   6   14.51    5.48 
  -8  -4  -6   20.63    3.11 
  -8   4  -6   28.51    4.54 
  -8   4  -6   19.22    4.95 
   8   4   6   19.85    3.43 
   9  -5  -6   -1.88    4.10 
   9  -5  -6    4.02    6.54 
   9  -5  -6    1.88    4.40 
  -9   5   6   10.33    5.97 
  -9   5   6   -0.37    2.91 
   9   5  -6   -0.26    3.07 
   8  -5  -6    5.50    3.41 
   8  -5  -6    1.94    3.53 
   8  -5  -6    8.37    5.44 
  -8   5   6    1.89    3.76 
  -8   5   6    3.11    2.92 
   8   5  -6    1.08    1.94 
  -8   5   6    1.29    4.55 
  -7  -5   6   40.37    3.09 
   7  -5  -6   32.95    4.68 
  -7  -5   6   36.61    3.78 
   7  -5  -6   41.14    6.44 
   7  -5  -6   46.65    6.06 
   7  -5  -6   35.33    4.39 
   7   5  -6   42.35    3.70 
  -7   5   6   44.96    5.28 
  -7   5   6   41.17    5.56 
   7   5  -6   41.45    3.83 
  -7   5   6   39.73    5.02 
   7   5  -6   42.72    2.91 
   6  -5  -6   52.39    6.05 
  -6  -5   6   31.84    2.30 
  -6  -5   6   34.45    3.53 
  -6  -5   6   35.87    2.85 
   6  -5  -6   34.39    4.64 
   6  -5  -6   41.76    5.04 
  -6  -5   6   33.77    2.29 
   6  -5  -6   43.50    5.85 
  -6   5   6   35.70    4.57 
   6   5  -6   35.27    3.35 
   6   5  -6   34.23    2.59 
  -6   5   6   35.53    5.17 
   5  -5  -6   15.42    4.12 
  -5  -5   6   16.59    1.89 
   5  -5  -6   14.59    3.13 
   5  -5  -6   12.72    3.33 
  -5  -5   6   18.44    2.36 
  -5  -5   6   12.94    1.90 
   5  -5  -6   18.20    3.13 
   5  -5  -6   15.92    2.79 
  -5   5   6   21.71    4.17 
  -5   5   6   18.31    2.84 
   5   5  -6   19.27    1.90 
  -5   5   6   19.59    2.72 
   5   5  -6   22.27    2.39 
  -5   5   6   14.89    3.32 
   5   5  -6   24.12    2.88 
   4  -5  -6  116.83    8.84 
   4  -5  -6  105.29    7.91 
  -4  -5   6  122.17    6.50 
   4  -5  -6  115.84    7.26 
  -4  -5   6  119.41    6.13 
  -4  -5   6  122.13    6.59 
   4   5  -6  109.23    6.69 
   4   5  -6  107.45    6.09 
  -4   5   6  103.71    7.57 
   4   5  -6  112.35    6.50 
  -4   5   6   99.78    7.94 
   4   5  -6  108.57    6.61 
  -4   5   6  105.36    8.43 
  -4   5   6  108.41    7.37 
   4   5  -6  105.56    6.04 
  -4   5   6  114.26    6.92 
  -3  -5   6    9.20    2.01 
   3  -5  -6    6.67    1.93 
  -3  -5   6   10.58    1.66 
   3  -5  -6   10.20    2.46 
   3  -5  -6    9.91    3.13 
   3  -5  -6   13.43    2.91 
  -3  -5   6    7.09    2.23 
  -3  -5   6   10.87    1.54 
  -3   5   6   14.15    2.34 
  -3   5   6   12.41    3.18 
   3   5  -6   16.00    2.19 
   3   5  -6   16.70    2.37 
   3   5  -6   20.62    2.61 
   3   5  -6   17.53    2.06 
   3   5  -6   17.35    2.02 
  -3   5   6   13.68    1.99 
  -3   5   6   19.92    3.05 
  -2  -5   6  127.89    7.89 
  -2  -5   6  125.81    6.79 
   2  -5  -6  130.09    7.81 
  -2  -5   6  128.97    7.13 
   2  -5  -6  127.73    7.66 
   2  -5  -6  128.03    8.78 
   2  -5  -6  136.05    8.29 
  -2  -5   6  127.68    7.00 
   2   5  -6  117.42    6.89 
   2   5  -6  109.74    6.94 
   2   5  -6  118.28    6.73 
  -2   5   6  114.24    7.22 
  -2   5   6  120.87    8.72 
   2   5  -6  120.00    7.24 
  -2   5   6  113.92    7.43 
  -2   5   6  113.68    8.23 
   2   5  -6  115.69    7.00 
  -2   5   6  116.37    7.69 
   1  -5  -6   62.70    5.74 
  -1  -5   6   64.99    4.85 
  -1  -5   6   64.05    4.45 
   1  -5  -6   62.16    5.03 
   1  -5  -6   69.13    6.30 
  -1  -5   6   65.54    4.71 
  -1  -5   6   64.34    5.65 
   1  -5  -6   68.42    5.20 
   1   5  -6   67.42    4.90 
  -1   5   6   64.78    5.58 
  -1   5   6   72.29    5.03 
  -1   5   6   76.86    5.51 
  -1   5   6   71.09    6.01 
   1   5  -6   70.44    4.65 
   1   5  -6   74.36    5.33 
  -1   5   6   72.58    4.98 
   1   5  -6   74.74    4.70 
   0  -5   6    0.57    1.64 
   0  -5  -6    1.09    1.53 
   0  -5   6    0.74    1.27 
   0  -5  -6    2.98    2.31 
   0  -5   6    2.67    1.43 
   0  -5   6    3.54    2.27 
   0  -5  -6    0.55    2.18 
   0   5   6    0.18    1.87 
   0   5  -6    1.59    1.61 
   0   5   6    2.95    1.67 
   0   5  -6    1.88    1.12 
   0   5  -6    2.68    1.41 
   0   5   6    1.78    1.47 
   0   5   6   -0.72    2.27 
   0   5  -6    1.40    1.38 
   0   5  -6    1.15    1.92 
  -1  -5  -6    7.99    2.06 
   1  -5   6    5.02    1.71 
   1  -5   6    5.96    2.21 
  -1  -5  -6    9.05    2.72 
   1  -5   6   10.89    2.91 
  -1  -5  -6    6.85    1.75 
   1   5   6    6.82    3.26 
   1   5   6    5.10    1.68 
  -1   5  -6    9.06    1.86 
   1   5   6    7.73    1.97 
  -1   5  -6    9.13    2.38 
  -1   5  -6    9.64    2.11 
   1   5   6    9.22    1.94 
  -2  -5  -6   73.78    5.49 
   2  -5   6   73.15    5.64 
   2  -5   6   73.74    4.87 
  -2  -5  -6   80.04    6.18 
   2  -5   6   76.02    7.01 
  -2  -5  -6   75.21    5.34 
  -2   5  -6   76.87    4.57 
   2   5   6   74.94    5.35 
  -2   5  -6   76.53    5.59 
  -2   5  -6   82.43    6.16 
   2   5   6   74.86    6.98 
   2   5   6   76.42    5.25 
  -2   5  -6   81.07    6.01 
  -3  -5  -6   53.16    4.64 
   3  -5   6   49.97    6.32 
   3  -5   6   60.05    4.92 
  -3  -5  -6   51.46    5.21 
  -3  -5  -6   52.39    4.30 
   3  -5   6   54.39    4.53 
   3  -5   6   49.05    3.91 
  -3   5  -6   40.75    4.63 
  -3   5  -6   39.59    4.82 
   3   5   6   46.77    4.04 
   3   5   6   52.66    6.46 
   3   5   6   50.91    4.08 
  -3   5  -6   45.18    3.49 
   4  -5   6   37.91    5.71 
   4  -5   6   34.37    3.62 
  -4  -5  -6   30.06    4.51 
  -4  -5  -6   35.61    4.48 
  -4  -5  -6   38.76    3.88 
   4  -5   6   35.70    4.83 
   4  -5   6   41.12    4.33 
  -4  -5  -6   37.01    4.65 
  -4   5  -6   38.44    3.41 
   4   5   6   40.79    3.81 
   4   5   6   35.28    3.39 
  -4   5  -6   36.20    4.92 
  -4   5  -6   37.20    4.85 
  -4   5  -6   27.46    3.67 
   4   5   6   42.68    5.63 
   5  -5   6   47.21    4.49 
  -5  -5  -6   42.56    4.23 
  -5  -5  -6   48.60    5.38 
   5  -5   6   48.37    5.79 
  -5  -5  -6   45.97    5.00 
   5  -5   6   46.63    6.41 
   5   5   6   43.10    4.36 
   5   5   6   47.17    6.36 
  -5   5  -6   44.47    4.10 
  -5   5  -6   38.15    5.27 
  -5   5  -6   45.24    5.80 
   6  -5   6   17.73    3.24 
  -6  -5  -6   18.75    3.58 
  -6  -5  -6   15.44    2.64 
   6  -5   6   13.51    3.96 
  -6  -5  -6   13.60    3.66 
   6  -5   6   11.79    5.34 
  -6   5  -6   22.98    4.62 
  -6   5  -6   22.92    4.27 
   6   5   6   23.53    6.26 
  -6   5  -6   21.49    3.00 
   6   5   6   22.19    3.12 
   7  -5   6   17.88    6.86 
   7  -5   6   13.25    4.32 
  -7  -5  -6   21.75    4.16 
  -7  -5  -6   14.39    2.84 
   7  -5   6   16.04    3.79 
  -7   5  -6   12.90    4.40 
   7   5   6   12.89    2.92 
  -7   5  -6   10.88    5.05 
   7  -6  -6   18.97    6.64 
   7  -6  -6   23.41    4.69 
   7  -6  -6   15.31    4.98 
  -7   6   6   10.69    3.65 
  -7   6   6    7.84    5.62 
   6  -6  -6    5.79    5.34 
   6  -6  -6   13.40    3.84 
   6  -6  -6    6.32    3.81 
  -6   6   6   18.64    3.90 
  -6   6   6   17.61    4.95 
   5  -6  -6   37.80    6.47 
   5  -6  -6   46.09    6.27 
  -5  -6   6   52.80    3.87 
  -5  -6   6   50.84    4.54 
   5  -6  -6   46.13    6.05 
  -5   6   6   53.04    6.16 
   5   6  -6   61.47    5.71 
   5   6  -6   62.93    5.18 
  -5   6   6   62.07    7.46 
   5   6  -6   51.56    3.90 
   5   6  -6   59.99    5.00 
   5   6  -6   58.54    3.85 
   4  -6  -6    3.02    2.81 
  -4  -6   6    2.23    1.49 
   4  -6  -6    4.45    2.53 
   4  -6  -6    2.54    4.26 
  -4  -6   6   -3.84    2.39 
   4   6  -6    0.40    2.20 
   4   6  -6    0.70    1.52 
  -4   6   6    4.39    3.26 
   4   6  -6    0.16    2.38 
   4   6  -6    1.53    2.07 
   4   6  -6    0.77    1.57 
  -4   6   6    1.64    2.59 
   3  -6  -6   49.44    6.01 
  -3  -6   6   51.69    4.24 
   3  -6  -6   56.37    5.53 
  -3  -6   6   59.94    4.56 
  -3  -6   6   55.36    5.99 
   3  -6  -6   61.81    5.90 
   3  -6  -6   60.20    7.76 
   3   6  -6   55.54    4.74 
   3   6  -6   61.35    4.50 
   3   6  -6   63.17    5.42 
   3   6  -6   56.75    4.86 
  -3   6   6   57.15    6.91 
  -3   6   6   61.38    6.46 
  -3   6   6   56.60    5.66 
   3   6  -6   59.98    4.89 
  -2  -6   6   26.85    4.14 
   2  -6  -6   25.12    4.80 
  -2  -6   6   31.68    3.39 
  -2  -6   6   26.26    3.47 
   2  -6  -6   27.45    3.68 
  -2  -6   6   26.35    3.57 
  -2   6   6   26.49    3.99 
  -2   6   6   26.85    3.70 
   2   6  -6   32.62    3.65 
   2   6  -6   29.49    3.87 
   2   6  -6   31.13    3.94 
   2   6  -6   33.16    3.95 
   2   6  -6   30.05    3.54 
  -2   6   6   29.46    5.39 
  -1  -6   6   18.88    3.21 
  -1  -6   6   14.71    3.85 
   1  -6  -6   17.45    4.34 
  -1  -6   6   15.99    2.57 
   1  -6  -6   13.86    2.80 
  -1  -6   6   14.25    2.49 
   1  -6  -6   17.81    3.05 
  -1   6   6   22.97    3.27 
  -1   6   6   15.59    3.25 
   1   6  -6   19.66    3.45 
   1   6  -6   21.54    2.81 
   1   6  -6   18.52    3.03 
   1   6  -6   25.21    3.25 
   1   6  -6   17.76    2.63 
  -1   6   6   19.38    4.53 
   0  -6   6   23.42    2.97 
   0  -6  -6   26.89    4.73 
   0  -6  -6   29.94    4.15 
   0  -6   6   27.09    3.78 
   0  -6   6   26.03    3.41 
   0  -6   6   22.30    4.42 
   0  -6  -6   26.30    3.65 
   0   6   6   29.89    5.06 
   0   6  -6   29.69    3.88 
   0   6  -6   34.45    3.36 
   0   6   6   24.48    3.54 
   0   6  -6   27.18    3.67 
   0   6   6   28.31    3.96 
   1  -6   6   24.73    4.64 
  -1  -6  -6   23.84    4.33 
  -1  -6  -6   20.47    3.45 
   1  -6   6   23.84    3.16 
  -1  -6  -6   22.67    3.13 
  -1   6  -6   21.78    2.63 
   1   6   6   18.26    4.30 
  -1   6  -6   18.50    3.02 
   1   6   6   17.48    3.06 
  -1   6  -6   25.89    3.71 
   1   6   6   20.79    3.16 
  -1   6  -6   24.75    4.12 
  -2  -6  -6   25.61    3.87 
  -2  -6  -6   23.55    4.02 
  -2  -6  -6   20.53    3.06 
   2  -6   6   20.82    3.33 
   2  -6   6   17.72    4.86 
   2  -6   6   20.90    3.21 
  -2   6  -6   23.34    4.30 
   2   6   6   13.51    4.79 
  -2   6  -6   20.24    3.19 
   2   6   6   13.90    2.92 
   2   6   6   22.79    3.23 
  -2   6  -6   25.03    3.17 
  -2   6  -6   15.82    3.57 
  -3  -6  -6   25.64    3.96 
  -3  -6  -6   35.79    4.30 
   3  -6   6   29.08    3.64 
   3  -6   6   38.41    4.17 
   3  -6   6   22.74    6.02 
  -3  -6  -6   29.04    4.44 
   3  -6   6   33.17    4.51 
  -3   6  -6   24.90    4.43 
  -3   6  -6   34.36    4.36 
  -3   6  -6   40.07    3.69 
   3   6   6   35.81    4.28 
   3   6   6   36.69    5.85 
   3   6   6   39.24    4.12 
  -4  -6  -6   13.84    2.72 
   4  -6   6    9.62    5.35 
  -4  -6  -6   13.42    3.75 
  -4  -6  -6   16.83    3.59 
   4  -6   6   15.67    4.02 
  -4   6  -6    8.19    2.32 
   4   6   6   11.43    2.37 
  -4   6  -6   11.11    3.58 
   4   6   6    4.04    5.56 
  -4   6  -6    9.43    4.12 
   4   6   6    8.38    2.70 
   5  -6   6    2.05    3.72 
  -5  -6  -6    7.17    2.67 
   5  -6   6    6.21    2.75 
   5  -6   6   10.45    6.15 
  -5   6  -6   13.47    4.60 
   5   6   6    3.45    2.53 
  -5   6  -6    9.10    4.24 
  -5   6  -6    2.14    2.87 
   6  -6   6   32.50    8.01 
  -6  -6  -6   50.83    5.59 
  -6  -6  -6   52.33    6.06 
   6  -6   6   52.22    6.39 
   6  -6   6   43.74    6.87 
  -6   6  -6   53.05    7.61 
  -6   6  -6   48.46    6.37 
   6   6   6   60.03    6.03 
  -5  -7   6   30.41    4.02 
   5  -7  -6   24.23    5.39 
   5  -7  -6   21.54    7.40 
   5  -7  -6   19.99    4.57 
  -5   7   6   20.08    4.44 
   5   7  -6   29.51    3.85 
  -5   7   6   25.05    6.09 
   4  -7  -6   43.06    5.45 
   4  -7  -6   39.94    7.30 
  -4  -7   6   38.31    4.61 
   4  -7  -6   44.77    5.98 
  -4   7   6   48.95    6.59 
  -4   7   6   51.17    7.23 
   4   7  -6   54.71    4.94 
   3  -7  -6   11.27    4.12 
   3  -7  -6   17.34    6.01 
  -3  -7   6   17.11    2.88 
   3   7  -6   16.55    3.13 
  -3   7   6   13.47    3.80 
   3   7  -6   16.95    3.55 
  -3   7   6   19.76    5.01 
  -2  -7   6   13.16    2.74 
  -2  -7   6   13.74    4.87 
   2  -7  -6    8.59    5.28 
   2  -7  -6   10.04    3.52 
   2   7  -6    5.71    3.04 
   2   7  -6    7.71    2.75 
  -2   7   6    9.08    3.66 
  -2   7   6    5.79    4.24 
   2   7  -6    4.73    3.06 
  -1  -7   6    4.90    5.16 
   1  -7  -6    3.54    4.11 
   1  -7  -6    2.78    4.88 
   1  -7  -6    9.11    2.81 
  -1  -7   6    2.16    2.57 
  -1   7   6    0.94    3.18 
  -1   7   6   19.24    4.35 
   1   7  -6    6.53    3.35 
   1   7  -6   10.72    3.06 
   1   7  -6   10.18    3.17 
   0  -7   6    8.09    5.21 
   0  -7  -6   14.76    5.25 
   0  -7  -6    7.61    4.33 
   0  -7   6   15.82    3.23 
   0  -7  -6   13.47    3.47 
   0   7  -6   11.58    3.58 
   0   7   6    9.27    2.97 
   0   7   6   11.68    3.63 
   0   7  -6   10.88    2.82 
   0   7  -6   12.74    3.42 
  -1  -7  -6   22.75    5.03 
  -1  -7  -6   20.02    3.79 
   1  -7   6   16.40    3.63 
   1  -7   6   24.23    6.13 
   1   7   6   17.82    3.85 
   1   7   6   18.54    3.53 
  -1   7  -6   19.26    4.51 
  -1   7  -6   19.79    3.74 
   1   7   6   14.01    6.32 
  -1   7  -6   21.73    3.10 
   2  -7   6   -0.29    3.07 
  -2  -7  -6    3.88    2.95 
  -2  -7  -6    4.86    4.48 
   2  -7   6    1.30    5.79 
   2   7   6   -0.67    2.69 
  -2   7  -6    2.83    3.34 
  -2   7  -6    1.43    3.72 
   2   7   6   -2.86    2.64 
   2   7   6    8.62    6.35 
  -2   7  -6    2.65    2.77 
   3  -7   6   15.09    3.97 
  -3  -7  -6   15.69    5.00 
  -3  -7  -6   21.58    3.90 
   3  -7   6   14.83    6.90 
   3   7   6   18.35    3.72 
   3   7   6   18.01    3.48 
  -3   7  -6   16.73    5.01 
  -3   7  -6   18.63    4.45 
  11   0  -7   22.48    4.29 
  11   0  -7   23.54    3.71 
 -11   0   7   26.64    3.01 
  10   0  -7    1.39    2.05 
 -10   0   7    2.16    1.32 
  10   0  -7   -0.12    1.69 
 -10   0   7    0.93    1.64 
  10   0  -7    3.20    1.65 
 -10   0   7   -0.57    2.60 
  10   0  -7    0.32    2.56 
  10   0  -7    2.69    2.20 
   9   0  -7    7.68    2.04 
   9   0  -7    7.21    1.73 
  -9   0   7    5.60    1.25 
   9   0  -7    7.13    1.48 
   9   0  -7    5.96    2.29 
   9   0  -7    5.72    1.82 
  -9   0   7    5.27    1.53 
  -9   0   7    9.16    2.39 
  -8   0   7  178.10    9.13 
   8   0  -7  176.33    9.04 
  -8   0   7  170.01    9.35 
   8   0  -7  170.28    9.57 
   8   0  -7  168.81    9.41 
   8   0  -7  170.37    9.35 
  -8   0   7  174.02    8.91 
   8   0  -7  174.67    8.96 
   7   0  -7    0.99    1.38 
   7   0  -7    0.84    0.77 
   7   0  -7    0.55    0.82 
   7   0  -7    0.76    0.83 
   7   0  -7   -0.15    1.11 
  -7   0   7    0.62    0.67 
  -7   0   7    0.12    1.19 
  -7   0   7    0.57    0.82 
   6   0  -7   55.99    3.74 
   6   0  -7   59.39    3.39 
  -6   0   7   62.01    3.93 
   6   0  -7   60.27    3.95 
  -6   0   7   58.72    3.69 
  -6   0   7   59.30    3.45 
   6   0  -7   56.24    3.50 
   6   0  -7   59.86    3.44 
   5   0  -7    4.63    1.17 
  -5   0   7    5.58    0.92 
   5   0  -7    4.91    0.86 
  -5   0   7    3.94    0.87 
  -5   0   7    5.16    1.03 
   5   0  -7    4.77    0.95 
  -5   0   7    4.88    0.76 
   5   0  -7    5.05    0.84 
   5   0  -7    5.54    0.78 
   4   0  -7  323.36   15.35 
   4   0  -7  312.36   15.53 
  -4   0   7  324.28   15.46 
   4   0  -7  332.00   15.71 
  -4   0   7  330.08   15.68 
  -4   0   7  321.01   15.53 
   4   0  -7  315.12   15.74 
   4   0  -7  320.17   15.49 
  -3   0   7  312.47   15.03 
   3   0  -7  324.85   15.28 
   3   0  -7  316.35   14.95 
  -3   0   7  310.58   14.98 
   3   0  -7  312.34   15.28 
   3   0  -7  311.08   14.98 
  -3   0   7  317.95   15.21 
   3   0  -7  305.74   15.00 
  -2   0   7   93.26    4.84 
   2   0  -7   92.27    4.71 
  -2   0   7   92.30    4.64 
  -2   0   7   89.62    4.59 
   2   0  -7   96.19    4.74 
  -2   0   7   91.32    4.75 
   2   0  -7   90.60    4.73 
  -2   0   7   92.54    4.68 
   2   0  -7   92.52    4.65 
   2   0  -7   93.25    4.72 
  -1   0   7  190.08    9.14 
   1   0  -7  188.45    9.00 
   1   0  -7  188.68    9.14 
   1   0  -7  185.63    9.00 
  -1   0   7  185.22    9.08 
  -1   0   7  181.28    8.82 
  -1   0   7  185.79    9.20 
   1   0  -7  179.53    8.85 
  -1   0   7  179.44    8.88 
   0   0  -7  122.23    6.32 
   0   0  -7  119.37    6.38 
   0   0  -7  122.53    6.36 
   0   0  -7  125.06    6.26 
   0   0   7  129.18    6.44 
   0   0   7  130.80    6.39 
   0   0   7  124.59    6.37 
   0   0   7  128.05    6.10 
  -1   0  -7  274.81   13.71 
   1   0   7  279.71   13.97 
   1   0   7  287.05   13.76 
   1   0   7  280.71   14.00 
  -1   0  -7  279.46   13.97 
  -1   0  -7  294.24   13.98 
   2   0   7  124.27    6.72 
  -2   0  -7  131.74    6.74 
  -2   0  -7  127.35    6.72 
   2   0   7  128.80    6.74 
   2   0   7  123.87    6.72 
  -2   0  -7  129.10    6.68 
   3   0   7   25.74    2.16 
  -3   0  -7   25.88    2.25 
  -3   0  -7   28.59    2.21 
   3   0   7   29.49    2.33 
  -3   0  -7   27.72    2.14 
   3   0   7   27.37    2.23 
  -4   0  -7   33.79    2.84 
   4   0   7   34.83    2.74 
   4   0   7   32.15    2.68 
   4   0   7   33.41    2.72 
  -4   0  -7   35.07    2.63 
  -4   0  -7   31.08    2.63 
   5   0   7  295.35   15.08 
  -5   0  -7  299.98   15.44 
   5   0   7  316.16   15.67 
  -5   0  -7  305.06   15.56 
   5   0   7  310.63   15.52 
  -5   0  -7  299.98   15.54 
  -6   0  -7   44.72    3.74 
   6   0   7   44.62    3.83 
   6   0   7   51.56    4.26 
   6   0   7   48.81    3.62 
  -6   0  -7   46.15    4.01 
  -6   0  -7   49.42    3.71 
   7   0   7   34.46    3.40 
   7   0   7   35.81    4.49 
  -7   0  -7   34.50    3.55 
  -7   0  -7   29.78    3.36 
  -7   0  -7   37.19    4.02 
   7   0   7   36.06    3.77 
   8   0   7   49.83    5.53 
  -8   0  -7   43.76    4.35 
  -8   0  -7   40.93    4.26 
   8   0   7   43.97    4.25 
   8   0   7   41.14    4.67 
  -8   0  -7   39.48    5.24 
   9   0   7   15.12    4.02 
  -9   0  -7   12.11    3.68 
   9   0   7   15.08    3.56 
  -9   0  -7   12.40    2.88 
   9   0   7   12.74    2.83 
   9   0   7   16.88    3.90 
  -9   0  -7   15.68    3.38 
 -10   0  -7    2.40    4.08 
  10   0   7    2.76    4.11 
 -10   0  -7    3.95    2.99 
  10   0   7   -3.00    3.41 
  10   0   7   -1.83    2.87 
  11  -1  -7   80.42    7.86 
 -11  -1   7   70.46    5.00 
  11  -1  -7   62.65    6.49 
  11   1  -7   69.27    6.59 
 -11   1   7   64.98    5.74 
  11   1  -7   76.59    6.24 
  10  -1  -7   82.59    7.31 
  10  -1  -7   88.17    6.55 
 -10  -1   7   69.47    4.91 
  10  -1  -7   84.48    6.47 
 -10  -1   7   76.86    5.76 
  10  -1  -7   81.52    5.95 
  10   1  -7   81.54    5.43 
 -10   1   7   83.35    7.10 
 -10   1   7   78.82    5.36 
 -10   1   7   83.72    5.80 
  10   1  -7   80.80    5.48 
  10   1  -7   85.97    6.16 
  10   1  -7   84.23    5.38 
   9  -1  -7    5.71    2.17 
   9  -1  -7    6.84    2.01 
  -9  -1   7    3.93    1.73 
  -9  -1   7    6.92    1.37 
   9  -1  -7    6.90    2.19 
   9  -1  -7    7.76    1.82 
   9  -1  -7    7.04    2.59 
   9   1  -7    7.75    1.65 
   9   1  -7    8.78    1.67 
  -9   1   7    9.08    1.89 
   9   1  -7    9.45    2.13 
  -9   1   7    7.51    2.67 
  -9   1   7    8.66    1.62 
   9   1  -7   10.91    1.64 
   9   1  -7    9.15    2.04 
   8  -1  -7   -0.64    1.85 
   8  -1  -7   -0.36    1.42 
   8  -1  -7   -0.17    1.49 
   8  -1  -7    1.46    1.13 
  -8  -1   7   -0.04    0.81 
  -8  -1   7    0.52    0.72 
   8  -1  -7    1.07    1.33 
  -8   1   7    3.09    1.28 
   8   1  -7    1.68    1.38 
   8   1  -7    2.07    0.98 
   8   1  -7    1.32    1.45 
   8   1  -7    2.54    1.02 
   8   1  -7    0.94    1.02 
  -8   1   7    2.93    1.93 
  -7  -1   7    3.41    0.67 
   7  -1  -7    2.69    1.69 
   7  -1  -7    3.37    1.31 
   7  -1  -7    5.49    1.19 
   7  -1  -7    4.98    1.37 
  -7  -1   7    4.40    0.81 
   7  -1  -7    4.15    1.41 
   7   1  -7    6.53    1.01 
  -7   1   7    5.41    1.45 
   7   1  -7    5.84    1.31 
   7   1  -7    6.26    1.41 
  -7   1   7    6.23    1.83 
   7   1  -7    6.25    0.96 
   7   1  -7    6.34    1.01 
  -7   1   7    4.26    1.20 
  -7   1   7    4.93    1.12 
   6  -1  -7   54.00    3.60 
   6  -1  -7   54.37    3.28 
  -6  -1   7   49.29    2.55 
   6  -1  -7   50.36    3.51 
   6  -1  -7   55.33    4.08 
  -6  -1   7   53.22    2.95 
   6  -1  -7   54.21    3.46 
  -6  -1   7   57.56    2.66 
  -6   1   7   46.85    3.18 
   6   1  -7   48.28    2.97 
  -6   1   7   48.49    3.59 
  -6   1   7   47.75    3.30 
   6   1  -7   47.90    2.78 
   6   1  -7   46.24    2.82 
   6   1  -7   42.00    2.70 
  -6   1   7   47.83    3.29 
   6   1  -7   46.05    3.28 
  -6   1   7   44.85    3.63 
  -5  -1   7   27.11    1.65 
   5  -1  -7   23.90    2.29 
   5  -1  -7   22.53    1.99 
   5  -1  -7   20.56    2.22 
   5  -1  -7   24.13    2.26 
   5  -1  -7   23.81    2.71 
   5   1  -7   31.02    1.62 
  -5   1   7   33.35    2.61 
   5   1  -7   26.93    1.63 
   5   1  -7   30.64    2.18 
  -5   1   7   30.45    2.17 
  -5   1   7   34.48    2.28 
  -5   1   7   29.44    2.59 
   4  -1  -7   72.71    4.17 
   4  -1  -7   68.65    4.24 
   4  -1  -7   72.52    4.29 
   4  -1  -7   71.65    4.49 
   4  -1  -7   70.66    4.19 
  -4   1   7   79.03    4.24 
  -4   1   7   75.52    4.23 
   4   1  -7   75.43    4.05
[truncated: 442,566 more chars]
